# Supplementary material
Source: MDPI journal article supplement (https://www.mdpi.com/2071-1050/12/24/10641)
Supplement: s1 [file s1]

Archive with 8 entries (8 files):
- 1040089_SupplementaryMaterial/Hueppe_etal_data.csv
- 1040089_SupplementaryMaterial/Hueppe_etal_Figure S1.pdf
- 1040089_SupplementaryMaterial/Hueppe_etal_Table S1.pdf
- 1040089_SupplementaryMaterial/Hueppe_etal_Table S2.pdf
- 1040089_SupplementaryMaterial/Hueppe_etal_Table S3.pdf
- 1040089_SupplementaryMaterial/Hueppe_etal_Table S4.pdf
- 1040089_SupplementaryMaterial/Hueppe_etal_Table S5.docx
- 1040089_SupplementaryMaterial/Hueppe_etal_Table S5.pdf
