# Supplementary material
Source: MDPI journal article supplement (https://www.mdpi.com/2071-1050/12/24/10641)
Supplement: s1 [file s1]

**Table S5.** Regression coefficients of models: **(a)** socio-economic class explaining farm structure, grassland management and vegetation characteristics (only target variables with socio-economic parameters remaining in model are shown), **(b)** socio-economic class and farm structure data explaining vegetation characteristics and **(c)** socio-economic class and grassland management explaining vegetation characteristics. P = part-time business, E = with agricultural education. Significant ( $P \leq 0.05$ ) effects are shown in bold. Missing values representing parameters not remaining in model after model validation.

| <b>(a) Socio-economic class</b>                                        |             |                |                       |               |             |               |                      |                    |                |                            |           |                |
|------------------------------------------------------------------------|-------------|----------------|-----------------------|---------------|-------------|---------------|----------------------|--------------------|----------------|----------------------------|-----------|----------------|
| Coefficients                                                           |             | Farm structure |                       |               |             |               | Grassland management |                    |                | Vegetation characteristics |           |                |
|                                                                        |             | Grassland area | Proportion horse area | Purchase      | Horses (LU) | Labour        | Mineral fertiliser   | Organic fertiliser | Reseeding      | alpha-HNV                  | gamma-HNV | Sørensen index |
|                                                                        | (Intercept) | 3.023          | 2.434                 | -1.402        | 3.586       | 1.145         | 0.681                | -3.328             | 6.801          | -1.352                     | 2.5       | 0.5487         |
| Income type                                                            | P           | <b>-0.860</b>  | -0.547                | -             | -1.189      | <b>-0.926</b> | -                    | -                  | -              | -                          | -         | -              |
| Education                                                              | E           | <b>0.475</b>   | <b>-2.470</b>         | <b>-1.482</b> | -           | -0.196        | 1.753                | 1.775              | <b>-14.364</b> | -0.658                     | -0.640    | -0.184         |
| I x E                                                                  | P x E       | -              | <b>2.651</b>          | -             | -           | -             | -                    | -                  | -              | -                          | -         | -              |
| <b>(b) Socio-economic class + farm structure data</b>                  |             |                |                       |               |             |               |                      |                    |                |                            |           |                |
| Coefficients                                                           |             | YS Forbs       | alpha-FSR             | beta-FSR      | gamma-FSR   | alpha-HNV     | beta-HNV             | gamma-HNV          | alpha-WR       | beta-WR                    | gamma-WR  | Sørensen index |
|                                                                        | (Intercept) | <b>-1.449</b>  | 2.105                 | <b>1.962</b>  | 2.646       | -2.386        | 0.595                | 1.311              | 3.006          | 2.073                      | 5.164     | 0.549          |
| Income type                                                            | P           | -              | -                     | -             | -           | -             | -                    | -                  | -              | -                          | -         | -              |
| Education                                                              | E           | -              | -                     | -             | -           | -             | -                    | -                  | -              | -                          | -         | -0.182         |
| IxE                                                                    | P x E       | -              | -                     | -             | -           | -             | -                    | -                  | -              | -                          | -         | -              |
| Grassland area                                                         |             | -              | 0.001                 | -             | 0.001       | -             | -                    | 0.011              | -              | -                          | 0.006     | -              |
| Proportion horse area                                                  |             | <b>0.360</b>   | 0.186                 | -             | 0.196       | 1.385         | 0.614                | 1.519              | 0.005          | -                          | -         | -              |
| Purchase                                                               |             | -              | -                     | -             | -           | -             | -                    | -                  | -              | -                          | -         | -              |
| Horses (LU)                                                            |             | <b>0.003</b>   | -                     | -             | -           | -0.016        | -                    | -0.015             | -              | -                          | -         | -              |
| Labour                                                                 |             | <b>-0.065</b>  | -                     | <b>0.029</b>  | -           | -             | -                    | -                  | -              | 0.072                      | -         | -              |
| <b>(c) Socio-economic class + fertilisation + grassland management</b> |             |                |                       |               |             |               |                      |                    |                |                            |           |                |
| Coefficients                                                           |             | YS Forbs       | alpha-FSR             |               |             | alpha-HNV     |                      |                    | alpha-WR       |                            |           | Sørensen index |
|                                                                        | (Intercept) | <b>-0.861</b>  | 2.434                 |               |             | -0.680        |                      |                    | 3.274          |                            |           | 0.486          |
| Income type                                                            | P           | -              | -                     |               |             | -             |                      |                    | -              |                            |           | -              |
| Education                                                              | E           | -              | -                     |               |             | -             |                      |                    | -              |                            |           | -0.147         |
| I x E                                                                  | P x E       | -              | -                     |               |             | -             |                      |                    | -              |                            |           | -              |
| Fertilisation                                                          | Yes         | -              | -                     |               |             | -             |                      |                    | -              |                            |           | -              |
| Collecting dung                                                        | Yes         | <b>0.276</b>   | -0.196                |               |             | -             |                      |                    | -0.734         |                            |           | -              |
| Harrowing                                                              | Yes         | -              | -                     |               |             | -             |                      |                    | -              |                            |           | 0.205          |
| Reseeding                                                              | Yes         | <b>-0.236</b>  | -0.087                |               |             | -0.654        |                      |                    | -              |                            |           | -              |
| Rolling                                                                | Yes         | -              | -                     |               |             | -             |                      |                    | 0.860          |                            |           | -              |
| Herbicides                                                             | Yes         | <b>-0.264</b>  | -0.125                |               |             | -             |                      |                    | -              |                            |           | -              |
| Topping                                                                | Yes         | <b>-0.199</b>  | -                     |               |             | -0.597        |                      |                    | -              |                            |           | -0.210         |
| Topping + cutting removal                                              | Yes         | -              | -0.131                |               |             | -0.893        |                      |                    | -              |                            |           | -              |
| Mowing                                                                 | Yes         | <b>-0.334</b>  | -0.144                |               |             | -0.347        |                      |                    | -0.555         |                            |           | -              |
