# Supplementary material
Source: MDPI journal article supplement (https://www.mdpi.com/2071-1050/12/24/10641)
Supplement: s1 [file s1]

8     **Supplementary Material Table S4.** Species list according to variable 'Weeds and Ruderals' (WR).

**Species 'Weeds and Ruderals' (WR)**

---

Aegopodium podagraria  
Capsella bursa pastoris  
Chenopodium album  
Colchicum automale  
Conium maculatum  
Equisetum arvense  
Equisetum palustre  
Glechoma hederacea  
Persicaria amphibia  
Persicaria bistorta  
Persicaria lapathifolia  
Persicaria maculosa  
Plantago major  
Ranunculus acris  
Ranunculus arvensis  
Ranunculus bulbosus  
Ranunculus ficaria  
Ranunculus flammula  
Ranunculus lingua  
Ranunculus repens  
Rumex crispus  
Rumex obtusifolius  
Senecio jacobaea  
Senecio vulgaris  
Stellaria media  
Urtica dioica

---
