# Supplementary material
Source: MDPI journal article supplement (https://www.mdpi.com/2071-1050/12/24/10641)
Supplement: s1 [file s1 › 1040089_SupplementaryMaterial/Hueppe_etal_data.csv]

farm_ID	paddock_ID	sample_ID	class	F_type	F_Educ	F_agri_area	F_GL	F_horsesLU	F_horse_area	F_prop_GL	F_prop_horse	F_labour	F_purchase	P_org_fertiliser	P_min_fertiliser	P_harrow	P_roll	P_topp	P_topp_removed	P_excrements	P_herbi	P_reseed	P_mow	YS_non-leg	YS_leg	YS_Forbs	paddock_SR_non-leg	paddock_SR_leg	alpha_FSR	farm_SR_non-leg	farm_SR_leg	gamma-FSR	beta-FSR	alpha_hnv	beta_hnv	gamma_hnv	gamma_WR	alpha_WR	beta_WR	Sorensen	S_species_a	S_species_b	S_species_c	patch	Achillea.millefolium	Achillea.nobilis	Acinos.arvensis	Aegopodium.podagraria	Agrimonia.eupatoria
2013_01	2013_01_01	2013_01_01_1_1	FWE	F	WE	40	30	10.2	26	0.75	0.65	1.5	0	NA	NA	1	0	0	0	0	0	0	1	20.625	27.5	48.125	7	1	8	13	4	17	7.5	1	3	4	6	4	2	0.857142857	1	1	6	grazed	0	0	0	0	0
2013_01	2013_01_01	2013_01_01_1_2	FWE	F	WE	40	30	10.2	26	0.75	0.65	1.5	0	NA	NA	1	0	0	0	0	0	0	1	20.625	27.5	48.125	7	1	8	13	4	17	7.5	1	3	4	6	4	2	0.857142857	1	1	6	avoided	0	0	0	0	0
2013_01	2013_01_01	2013_01_01_2_1	FWE	F	WE	40	30	10.2	26	0.75	0.65	1.5	0	NA	NA	1	0	0	0	0	0	0	1	20.625	27.5	48.125	7	1	8	13	4	17	7.5	1	3	4	6	4	2	0.857142857	1	1	6	grazed	0	0	0	0	0
2013_01	2013_01_01	2013_01_01_2_2	FWE	F	WE	40	30	10.2	26	0.75	0.65	1.5	0	NA	NA	1	0	0	0	0	0	0	1	20.625	27.5	48.125	7	1	8	13	4	17	7.5	1	3	4	6	4	2	0.857142857	1	1	6	avoided	0	0	0	0	0
2013_01	2013_01_01	2013_01_01_3_1	FWE	F	WE	40	30	10.2	26	0.75	0.65	1.5	0	NA	NA	1	0	0	0	0	0	0	1	20.625	27.5	48.125	7	1	8	13	4	17	7.5	1	3	4	6	4	2	0.857142857	1	1	6	grazed	0	0	0	0	0
2013_01	2013_01_01	2013_01_01_3_2	FWE	F	WE	40	30	10.2	26	0.75	0.65	1.5	0	NA	NA	1	0	0	0	0	0	0	1	20.625	27.5	48.125	7	1	8	13	4	17	7.5	1	3	4	6	4	2	0.857142857	1	1	6	avoided	0	0	0	0	0
2013_01	2013_01_01	2013_01_01_4_1	FWE	F	WE	40	30	10.2	26	0.75	0.65	1.5	0	NA	NA	1	0	0	0	0	0	0	1	20.625	27.5	48.125	7	1	8	13	4	17	7.5	1	3	4	6	4	2	0.857142857	1	1	6	grazed	0	0	0	0	0
2013_01	2013_01_01	2013_01_01_4_2	FWE	F	WE	40	30	10.2	26	0.75	0.65	1.5	0	NA	NA	1	0	0	0	0	0	0	1	20.625	27.5	48.125	7	1	8	13	4	17	7.5	1	3	4	6	4	2	0.857142857	1	1	6	avoided	0	0	0	0	0
2013_01	2013_01_02	2013_01_02_1_1	FWE	F	WE	40	30	10.2	26	0.75	0.65	1.5	0	NA	NA	1	0	0	0	0	0	0	1	24.375	13.75	38.125	8	4	12	13	4	17	7.5	4	0	4	6	3	3	0.857142857	1	2	9	grazed	0	0	0	0	0
2013_01	2013_01_02	2013_01_02_1_2	FWE	F	WE	40	30	10.2	26	0.75	0.65	1.5	0	NA	NA	1	0	0	0	0	0	0	1	24.375	13.75	38.125	8	4	12	13	4	17	7.5	4	0	4	6	3	3	0.857142857	1	2	9	avoided	0	0	0	0	0
2013_01	2013_01_02	2013_01_02_2_1	FWE	F	WE	40	30	10.2	26	0.75	0.65	1.5	0	NA	NA	1	0	0	0	0	0	0	1	24.375	13.75	38.125	8	4	12	13	4	17	7.5	4	0	4	6	3	3	0.857142857	1	2	9	grazed	0	0	0	0	0
2013_01	2013_01_02	2013_01_02_2_2	FWE	F	WE	40	30	10.2	26	0.75	0.65	1.5	0	NA	NA	1	0	0	0	0	0	0	1	24.375	13.75	38.125	8	4	12	13	4	17	7.5	4	0	4	6	3	3	0.857142857	1	2	9	avoided	0	0	0	0	0
2013_01	2013_01_02	2013_01_02_3_1	FWE	F	WE	40	30	10.2	26	0.75	0.65	1.5	0	NA	NA	1	0	0	0	0	0	0	1	24.375	13.75	38.125	8	4	12	13	4	17	7.5	4	0	4	6	3	3	0.857142857	1	2	9	grazed	0	0	0	0	0
2013_01	2013_01_02	2013_01_02_3_2	FWE	F	WE	40	30	10.2	26	0.75	0.65	1.5	0	NA	NA	1	0	0	0	0	0	0	1	24.375	13.75	38.125	8	4	12	13	4	17	7.5	4	0	4	6	3	3	0.857142857	1	2	9	avoided	0	0	0	0	0
2013_01	2013_01_02	2013_01_02_4_1	FWE	F	WE	40	30	10.2	26	0.75	0.65	1.5	0	NA	NA	1	0	0	0	0	0	0	1	24.375	13.75	38.125	8	4	12	13	4	17	7.5	4	0	4	6	3	3	0.857142857	1	2	9	grazed	0	0	0	0	0
2013_01	2013_01_02	2013_01_02_4_2	FWE	F	WE	40	30	10.2	26	0.75	0.65	1.5	0	NA	NA	1	0	0	0	0	0	0	1	24.375	13.75	38.125	8	4	12	13	4	17	7.5	4	0	4	6	3	3	0.857142857	1	2	9	avoided	0	0	0	0	0
2013_01	2013_01_03	2013_01_03_1_1	FWE	F	WE	40	30	10.2	26	0.75	0.65	1.5	0	NA	NA	1	0	0	0	0	0	0	1	10.625	21.5	32.125	8	2	10	13	4	17	7.5	2	2	4	6	4	2	0.888888889	1	1	8	grazed	0	0	0	0	0
2013_01	2013_01_03	2013_01_03_1_2	FWE	F	WE	40	30	10.2	26	0.75	0.65	1.5	0	NA	NA	1	0	0	0	0	0	0	1	10.625	21.5	32.125	8	2	10	13	4	17	7.5	2	2	4	6	4	2	0.888888889	1	1	8	avoided	0	0	0	0	0
2013_01	2013_01_03	2013_01_03_2_1	FWE	F	WE	40	30	10.2	26	0.75	0.65	1.5	0	NA	NA	1	0	0	0	0	0	0	1	10.625	21.5	32.125	8	2	10	13	4	17	7.5	2	2	4	6	4	2	0.888888889	1	1	8	grazed	1	0	0	0	0
2013_01	2013_01_03	2013_01_03_2_2	FWE	F	WE	40	30	10.2	26	0.75	0.65	1.5	0	NA	NA	1	0	0	0	0	0	0	1	10.625	21.5	32.125	8	2	10	13	4	17	7.5	2	2	4	6	4	2	0.888888889	1	1	8	avoided	1	0	0	0	0
2013_01	2013_01_03	2013_01_03_3_1	FWE	F	WE	40	30	10.2	26	0.75	0.65	1.5	0	NA	NA	1	0	0	0	0	0	0	1	10.625	21.5	32.125	8	2	10	13	4	17	7.5	2	2	4	6	4	2	0.888888889	1	1	8	grazed	1	0	0	0	0
2013_01	2013_01_03	2013_01_03_3_2	FWE	F	WE	40	30	10.2	26	0.75	0.65	1.5	0	NA	NA	1	0	0	0	0	0	0	1	10.625	21.5	32.125	8	2	10	13	4	17	7.5	2	2	4	6	4	2	0.888888889	1	1	8	avoided	0	0	0	0	0
2013_01	2013_01_03	2013_01_03_4_1	FWE	F	WE	40	30	10.2	26	0.75	0.65	1.5	0	NA	NA	1	0	0	0	0	0	0	1	10.625	21.5	32.125	8	2	10	13	4	17	7.5	2	2	4	6	4	2	0.888888889	1	1	8	grazed	0	0	0	0	0
2013_01	2013_01_03	2013_01_03_4_2	FWE	F	WE	40	30	10.2	26	0.75	0.65	1.5	0	NA	NA	1	0	0	0	0	0	0	1	10.625	21.5	32.125	8	2	10	13	4	17	7.5	2	2	4	6	4	2	0.888888889	1	1	8	avoided	1	0	0	0	0
2013_01	2013_01_04	2013_01_04_1_1	FWE	F	WE	40	30	10.2	26	0.75	0.65	1.5	0	NA	NA	1	0	0	0	0	0	0	0	24.375	18.125	42.5	6	2	8	13	4	17	7.5	2	2	4	6	2	4	0.769230769	2	1	5	grazed	1	0	0	0	0
2013_01	2013_01_04	2013_01_04_1_2	FWE	F	WE	40	30	10.2	26	0.75	0.65	1.5	0	NA	NA	1	0	0	0	0	0	0	0	24.375	18.125	42.5	6	2	8	13	4	17	7.5	2	2	4	6	2	4	0.769230769	2	1	5	avoided	1	0	0	0	0
2013_01	2013_01_04	2013_01_04_2_1	FWE	F	WE	40	30	10.2	26	0.75	0.65	1.5	0	NA	NA	1	0	0	0	0	0	0	0	24.375	18.125	42.5	6	2	8	13	4	17	7.5	2	2	4	6	2	4	0.769230769	2	1	5	grazed	0	0	0	0	0
2013_01	2013_01_04	2013_01_04_2_2	FWE	F	WE	40	30	10.2	26	0.75	0.65	1.5	0	NA	NA	1	0	0	0	0	0	0	0	24.375	18.125	42.5	6	2	8	13	4	17	7.5	2	2	4	6	2	4	0.769230769	2	1	5	avoided	1	0	0	0	0
2013_01	2013_01_04	2013_01_04_3_1	FWE	F	WE	40	30	10.2	26	0.75	0.65	1.5	0	NA	NA	1	0	0	0	0	0	0	0	24.375	18.125	42.5	6	2	8	13	4	17	7.5	2	2	4	6	2	4	0.769230769	2	1	5	grazed	1	0	0	0	0
2013_01	2013_01_04	2013_01_04_3_2	FWE	F	WE	40	30	10.2	26	0.75	0.65	1.5	0	NA	NA	1	0	0	0	0	0	0	0	24.375	18.125	42.5	6	2	8	13	4	17	7.5	2	2	4	6	2	4	0.769230769	2	1	5	avoided	1	0	0	0	0
2013_01	2013_01_04	2013_01_04_4_1	FWE	F	WE	40	30	10.2	26	0.75	0.65	1.5	0	NA	NA	1	0	0	0	0	0	0	0	24.375	18.125	42.5	6	2	8	13	4	17	7.5	2	2	4	6	2	4	0.769230769	2	1	5	grazed	1	0	0	0	0
2013_01	2013_01_04	2013_01_04_4_2	FWE	F	WE	40	30	10.2	26	0.75	0.65	1.5	0	NA	NA	1	0	0	0	0	0	0	0	24.375	18.125	42.5	6	2	8	13	4	17	7.5	2	2	4	6	2	4	0.769230769	2	1	5	avoided	0	0	0	0	0
2013_03	2013_03_01	2013_03_01_1_1	PE	P	E	11	6.2	33	11	0.563636364	1	0.9	20	0	1	1	1	1	0	0	0	0	0	39.125	13.375	52.5	12	2	14	16	2	18	9.5	1	0	1	5	3	2	0.727272727	2	4	8	grazed	1	0	0	0	0
2013_03	2013_03_01	2013_03_01_1_2	PE	P	E	11	6.2	33	11	0.563636364	1	0.9	20	0	1	1	1	1	0	0	0	0	0	39.125	13.375	52.5	12	2	14	16	2	18	9.5	1	0	1	5	3	2	0.727272727	2	4	8	avoided	1	0	0	0	0
2013_03	2013_03_01	2013_03_01_2_1	PE	P	E	11	6.2	33	11	0.563636364	1	0.9	20	0	1	1	1	1	0	0	0	0	0	39.125	13.375	52.5	12	2	14	16	2	18	9.5	1	0	1	5	3	2	0.727272727	2	4	8	grazed	1	0	0	0	0
2013_03	2013_03_01	2013_03_01_2_2	PE	P	E	11	6.2	33	11	0.563636364	1	0.9	20	0	1	1	1	1	0	0	0	0	0	39.125	13.375	52.5	12	2	14	16	2	18	9.5	1	0	1	5	3	2	0.727272727	2	4	8	avoided	0	0	0	0	0
2013_03	2013_03_01	2013_03_01_3_1	PE	P	E	11	6.2	33	11	0.563636364	1	0.9	20	0	1	1	1	1	0	0	0	0	0	39.125	13.375	52.5	12	2	14	16	2	18	9.5	1	0	1	5	3	2	0.727272727	2	4	8	grazed	1	0	0	0	0
2013_03	2013_03_01	2013_03_01_3_2	PE	P	E	11	6.2	33	11	0.563636364	1	0.9	20	0	1	1	1	1	0	0	0	0	0	39.125	13.375	52.5	12	2	14	16	2	18	9.5	1	0	1	5	3	2	0.727272727	2	4	8	avoided	0	0	0	0	0
2013_03	2013_03_01	2013_03_01_4_1	PE	P	E	11	6.2	33	11	0.563636364	1	0.9	20	0	1	1	1	1	0	0	0	0	0	39.125	13.375	52.5	12	2	14	16	2	18	9.5	1	0	1	5	3	2	0.727272727	2	4	8	grazed	0	0	0	0	0
2013_03	2013_03_01	2013_03_01_4_2	PE	P	E	11	6.2	33	11	0.563636364	1	0.9	20	0	1	1	1	1	0	0	0	0	0	39.125	13.375	52.5	12	2	14	16	2	18	9.5	1	0	1	5	3	2	0.727272727	2	4	8	avoided	0	0	0	0	0
2013_03	2013_03_02	2013_03_02_1_1	PE	P	E	11	6.2	33	11	0.563636364	1	0.9	20	0	1	1	1	1	0	0	0	0	0	10	0	10	10	0	10	16	2	18	9.5	1	0	1	5	4	1	0.571428571	3	3	4	grazed	0	0	0	0	0
2013_03	2013_03_02	2013_03_02_1_2	PE	P	E	11	6.2	33	11	0.563636364	1	0.9	20	0	1	1	1	1	0	0	0	0	0	10	0	10	10	0	10	16	2	18	9.5	1	0	1	5	4	1	0.571428571	3	3	4	avoided	0	0	0	0	0
2013_03	2013_03_02	2013_03_02_2_1	PE	P	E	11	6.2	33	11	0.563636364	1	0.9	20	0	1	1	1	1	0	0	0	0	0	10	0	10	10	0	10	16	2	18	9.5	1	0	1	5	4	1	0.571428571	3	3	4	grazed	0	0	0	0	0
2013_03	2013_03_02	2013_03_02_2_2	PE	P	E	11	6.2	33	11	0.563636364	1	0.9	20	0	1	1	1	1	0	0	0	0	0	10	0	10	10	0	10	16	2	18	9.5	1	0	1	5	4	1	0.571428571	3	3	4	avoided	0	0	0	0	0
2013_03	2013_03_02	2013_03_02_3_1	PE	P	E	11	6.2	33	11	0.563636364	1	0.9	20	0	1	1	1	1	0	0	0	0	0	10	0	10	10	0	10	16	2	18	9.5	1	0	1	5	4	1	0.571428571	3	3	4	grazed	0	0	0	0	0
2013_03	2013_03_02	2013_03_02_3_2	PE	P	E	11	6.2	33	11	0.563636364	1	0.9	20	0	1	1	1	1	0	0	0	0	0	10	0	10	10	0	10	16	2	18	9.5	1	0	1	5	4	1	0.571428571	3	3	4	avoided	0	0	0	0	0
2013_03	2013_03_02	2013_03_02_4_1	PE	P	E	11	6.2	33	11	0.563636364	1	0.9	20	0	1	1	1	1	0	0	0	0	0	10	0	10	10	0	10	16	2	18	9.5	1	0	1	5	4	1	0.571428571	3	3	4	grazed	0	0	0	0	0
2013_03	2013_03_02	2013_03_02_4_2	PE	P	E	11	6.2	33	11	0.563636364	1	0.9	20	0	1	1	1	1	0	0	0	0	0	10	0	10	10	0	10	16	2	18	9.5	1	0	1	5	4	1	0.571428571	3	3	4	avoided	0	0	0	0	0
2013_03	2013_03_03	2013_03_03_1_1	PE	P	E	11	6.2	33	11	0.563636364	1	0.9	20	1	1	1	1	1	0	0	0	0	1	1.125	0	1.125	5	0	5	16	2	18	9.5	0	1	1	5	2	3	0.571428571	1	2	2	grazed	0	0	0	0	0
2013_03	2013_03_03	2013_03_03_1_2	PE	P	E	11	6.2	33	11	0.563636364	1	0.9	20	1	1	1	1	1	0	0	0	0	1	1.125	0	1.125	5	0	5	16	2	18	9.5	0	1	1	5	2	3	0.571428571	1	2	2	avoided	0	0	0	0	0
2013_03	2013_03_03	2013_03_03_2_1	PE	P	E	11	6.2	33	11	0.563636364	1	0.9	20	1	1	1	1	1	0	0	0	0	1	1.125	0	1.125	5	0	5	16	2	18	9.5	0	1	1	5	2	3	0.571428571	1	2	2	grazed	0	0	0	0	0
2013_03	2013_03_03	2013_03_03_2_2	PE	P	E	11	6.2	33	11	0.563636364	1	0.9	20	1	1	1	1	1	0	0	0	0	1	1.125	0	1.125	5	0	5	16	2	18	9.5	0	1	1	5	2	3	0.571428571	1	2	2	avoided	0	0	0	0	0
2013_03	2013_03_03	2013_03_03_3_1	PE	P	E	11	6.2	33	11	0.563636364	1	0.9	20	1	1	1	1	1	0	0	0	0	1	1.125	0	1.125	5	0	5	16	2	18	9.5	0	1	1	5	2	3	0.571428571	1	2	2	grazed	0	0	0	0	0
2013_03	2013_03_03	2013_03_03_3_2	PE	P	E	11	6.2	33	11	0.563636364	1	0.9	20	1	1	1	1	1	0	0	0	0	1	1.125	0	1.125	5	0	5	16	2	18	9.5	0	1	1	5	2	3	0.571428571	1	2	2	avoided	0	0	0	0	0
2013_03	2013_03_03	2013_03_03_4_1	PE	P	E	11	6.2	33	11	0.563636364	1	0.9	20	1	1	1	1	1	0	0	0	0	1	1.125	0	1.125	5	0	5	16	2	18	9.5	0	1	1	5	2	3	0.571428571	1	2	2	grazed	0	0	0	0	0
2013_03	2013_03_03	2013_03_03_4_2	PE	P	E	11	6.2	33	11	0.563636364	1	0.9	20	1	1	1	1	1	0	0	0	0	1	1.125	0	1.125	5	0	5	16	2	18	9.5	0	1	1	5	2	3	0.571428571	1	2	2	avoided	0	0	0	0	0
2013_03	2013_03_04	2013_03_04_1_1	PE	P	E	11	6.2	33	11	0.563636364	1	0.9	20	1	1	1	1	1	0	0	0	0	1	6	0	6	5	0	5	16	2	18	9.5	1	0	1	5	1	4	0.571428571	1	2	2	grazed	0	0	0	0	0
2013_03	2013_03_04	2013_03_04_1_2	PE	P	E	11	6.2	33	11	0.563636364	1	0.9	20	1	1	1	1	1	0	0	0	0	1	6	0	6	5	0	5	16	2	18	9.5	1	0	1	5	1	4	0.571428571	1	2	2	avoided	0	0	0	0	0
2013_03	2013_03_04	2013_03_04_2_1	PE	P	E	11	6.2	33	11	0.563636364	1	0.9	20	1	1	1	1	1	0	0	0	0	1	6	0	6	5	0	5	16	2	18	9.5	1	0	1	5	1	4	0.571428571	1	2	2	grazed	0	0	0	0	0
2013_03	2013_03_04	2013_03_04_2_2	PE	P	E	11	6.2	33	11	0.563636364	1	0.9	20	1	1	1	1	1	0	0	0	0	1	6	0	6	5	0	5	16	2	18	9.5	1	0	1	5	1	4	0.571428571	1	2	2	avoided	0	0	0	0	0
2013_03	2013_03_04	2013_03_04_3_1	PE	P	E	11	6.2	33	11	0.563636364	1	0.9	20	1	1	1	1	1	0	0	0	0	1	6	0	6	5	0	5	16	2	18	9.5	1	0	1	5	1	4	0.571428571	1	2	2	grazed	0	0	0	0	0
2013_03	2013_03_04	2013_03_04_3_2	PE	P	E	11	6.2	33	11	0.563636364	1	0.9	20	1	1	1	1	1	0	0	0	0	1	6	0	6	5	0	5	16	2	18	9.5	1	0	1	5	1	4	0.571428571	1	2	2	avoided	0	0	0	0	0
2013_03	2013_03_04	2013_03_04_4_1	PE	P	E	11	6.2	33	11	0.563636364	1	0.9	20	1	1	1	1	1	0	0	0	0	1	6	0	6	5	0	5	16	2	18	9.5	1	0	1	5	1	4	0.571428571	1	2	2	grazed	0	0	0	0	0
2013_03	2013_03_04	2013_03_04_4_2	PE	P	E	11	6.2	33	11	0.563636364	1	0.9	20	1	1	1	1	1	0	0	0	0	1	6	0	6	5	0	5	16	2	18	9.5	1	0	1	5	1	4	0.571428571	1	2	2	avoided	0	0	0	0	0
2013_04	2013_04_01	2013_04_01_1_1	FWE	F	WE	9.34	9.34	14.38	9.34	1	1	3	24.8	0	1	1	0	1	0	0	0	0	0	18.5	0.375	18.875	17	1	18	22	1	23	12.25	2	1	3	6	6	0	0.615384615	2	8	8	grazed	0	0	0	0	0
2013_04	2013_04_01	2013_04_01_1_2	FWE	F	WE	9.34	9.34	14.38	9.34	1	1	3	24.8	0	1	1	0	1	0	0	0	0	0	18.5	0.375	18.875	17	1	18	22	1	23	12.25	2	1	3	6	6	0	0.615384615	2	8	8	avoided	0	0	0	0	0
2013_04	2013_04_01	2013_04_01_2_1	FWE	F	WE	9.34	9.34	14.38	9.34	1	1	3	24.8	0	1	1	0	1	0	0	0	0	0	18.5	0.375	18.875	17	1	18	22	1	23	12.25	2	1	3	6	6	0	0.615384615	2	8	8	grazed	0	0	0	0	0
2013_04	2013_04_01	2013_04_01_2_2	FWE	F	WE	9.34	9.34	14.38	9.34	1	1	3	24.8	0	1	1	0	1	0	0	0	0	0	18.5	0.375	18.875	17	1	18	22	1	23	12.25	2	1	3	6	6	0	0.615384615	2	8	8	avoided	0	0	0	0	0
2013_04	2013_04_01	2013_04_01_3_1	FWE	F	WE	9.34	9.34	14.38	9.34	1	1	3	24.8	0	1	1	0	1	0	0	0	0	0	18.5	0.375	18.875	17	1	18	22	1	23	12.25	2	1	3	6	6	0	0.615384615	2	8	8	grazed	0	0	0	0	0
2013_04	2013_04_01	2013_04_01_3_2	FWE	F	WE	9.34	9.34	14.38	9.34	1	1	3	24.8	0	1	1	0	1	0	0	0	0	0	18.5	0.375	18.875	17	1	18	22	1	23	12.25	2	1	3	6	6	0	0.615384615	2	8	8	avoided	0	0	0	0	0
2013_04	2013_04_01	2013_04_01_4_1	FWE	F	WE	9.34	9.34	14.38	9.34	1	1	3	24.8	0	1	1	0	1	0	0	0	0	0	18.5	0.375	18.875	17	1	18	22	1	23	12.25	2	1	3	6	6	0	0.615384615	2	8	8	grazed	0	0	0	0	0
2013_04	2013_04_01	2013_04_01_4_2	FWE	F	WE	9.34	9.34	14.38	9.34	1	1	3	24.8	0	1	1	0	1	0	0	0	0	0	18.5	0.375	18.875	17	1	18	22	1	23	12.25	2	1	3	6	6	0	0.615384615	2	8	8	avoided	0	0	0	0	0
2013_04	2013_04_02	2013_04_02_1_1	FWE	F	WE	9.34	9.34	14.38	9.34	1	1	3	24.8	0	1	1	0	1	0	0	0	0	0	0.375	0.4375	0.8125	10	1	11	22	1	23	12.25	1	2	3	6	4	2	0.625	4	2	5	grazed	0	0	0	0	0
2013_04	2013_04_02	2013_04_02_1_2	FWE	F	WE	9.34	9.34	14.38	9.34	1	1	3	24.8	0	1	1	0	1	0	0	0	0	0	0.375	0.4375	0.8125	10	1	11	22	1	23	12.25	1	2	3	6	4	2	0.625	4	2	5	avoided	0	0	0	0	0
2013_04	2013_04_02	2013_04_02_2_1	FWE	F	WE	9.34	9.34	14.38	9.34	1	1	3	24.8	0	1	1	0	1	0	0	0	0	0	0.375	0.4375	0.8125	10	1	11	22	1	23	12.25	1	2	3	6	4	2	0.625	4	2	5	grazed	0	0	0	0	0
2013_04	2013_04_02	2013_04_02_2_2	FWE	F	WE	9.34	9.34	14.38	9.34	1	1	3	24.8	0	1	1	0	1	0	0	0	0	0	0.375	0.4375	0.8125	10	1	11	22	1	23	12.25	1	2	3	6	4	2	0.625	4	2	5	avoided	0	0	0	0	0
2013_04	2013_04_02	2013_04_02_3_1	FWE	F	WE	9.34	9.34	14.38	9.34	1	1	3	24.8	0	1	1	0	1	0	0	0	0	0	0.375	0.4375	0.8125	10	1	11	22	1	23	12.25	1	2	3	6	4	2	0.625	4	2	5	grazed	0	0	0	0	0
2013_04	2013_04_02	2013_04_02_3_2	FWE	F	WE	9.34	9.34	14.38	9.34	1	1	3	24.8	0	1	1	0	1	0	0	0	0	0	0.375	0.4375	0.8125	10	1	11	22	1	23	12.25	1	2	3	6	4	2	0.625	4	2	5	avoided	0	0	0	0	0
2013_04	2013_04_02	2013_04_02_4_1	FWE	F	WE	9.34	9.34	14.38	9.34	1	1	3	24.8	0	1	1	0	1	0	0	0	0	0	0.375	0.4375	0.8125	10	1	11	22	1	23	12.25	1	2	3	6	4	2	0.625	4	2	5	grazed	0	0	0	0	0
2013_04	2013_04_02	2013_04_02_4_2	FWE	F	WE	9.34	9.34	14.38	9.34	1	1	3	24.8	0	1	1	0	1	0	0	0	0	0	0.375	0.4375	0.8125	10	1	11	22	1	23	12.25	1	2	3	6	4	2	0.625	4	2	5	avoided	0	0	0	0	0
2013_04	2013_04_03	2013_04_03_1_1	FWE	F	WE	9.34	9.34	14.38	9.34	1	1	3	24.8	0	1	1	0	1	0	0	0	1	1	12.375	0	12.375	8	0	8	22	1	23	12.25	2	1	3	6	2	4	0.4	2	4	2	grazed	0	0	0	0	0
2013_04	2013_04_03	2013_04_03_1_2	FWE	F	WE	9.34	9.34	14.38	9.34	1	1	3	24.8	0	1	1	0	1	0	0	0	1	1	12.375	0	12.375	8	0	8	22	1	23	12.25	2	1	3	6	2	4	0.4	2	4	2	avoided	0	0	0	0	0
2013_04	2013_04_03	2013_04_03_2_1	FWE	F	WE	9.34	9.34	14.38	9.34	1	1	3	24.8	0	1	1	0	1	0	0	0	1	1	12.375	0	12.375	8	0	8	22	1	23	12.25	2	1	3	6	2	4	0.4	2	4	2	grazed	0	0	0	0	0
2013_04	2013_04_03	2013_04_03_2_2	FWE	F	WE	9.34	9.34	14.38	9.34	1	1	3	24.8	0	1	1	0	1	0	0	0	1	1	12.375	0	12.375	8	0	8	22	1	23	12.25	2	1	3	6	2	4	0.4	2	4	2	avoided	0	0	0	0	0
2013_04	2013_04_03	2013_04_03_3_1	FWE	F	WE	9.34	9.34	14.38	9.34	1	1	3	24.8	0	1	1	0	1	0	0	0	1	1	12.375	0	12.375	8	0	8	22	1	23	12.25	2	1	3	6	2	4	0.4	2	4	2	grazed	0	0	0	0	0
2013_04	2013_04_03	2013_04_03_3_2	FWE	F	WE	9.34	9.34	14.38	9.34	1	1	3	24.8	0	1	1	0	1	0	0	0	1	1	12.375	0	12.375	8	0	8	22	1	23	12.25	2	1	3	6	2	4	0.4	2	4	2	avoided	0	0	0	0	0
2013_04	2013_04_03	2013_04_03_4_1	FWE	F	WE	9.34	9.34	14.38	9.34	1	1	3	24.8	0	1	1	0	1	0	0	0	1	1	12.375	0	12.375	8	0	8	22	1	23	12.25	2	1	3	6	2	4	0.4	2	4	2	grazed	0	0	0	0	0
2013_04	2013_04_03	2013_04_03_4_2	FWE	F	WE	9.34	9.34	14.38	9.34	1	1	3	24.8	0	1	1	0	1	0	0	0	1	1	12.375	0	12.375	8	0	8	22	1	23	12.25	2	1	3	6	2	4	0.4	2	4	2	avoided	0	0	0	0	0
2013_04	2013_04_04	2013_04_04_1_1	FWE	F	WE	9.34	9.34	14.38	9.34	1	1	3	24.8	0	1	1	0	1	0	0	0	1	1	0	0	0	6	0	6	22	1	23	12.25	0	3	3	6	1	5	0.5	2	2	2	grazed	0	0	0	0	0
2013_04	2013_04_04	2013_04_04_1_2	FWE	F	WE	9.34	9.34	14.38	9.34	1	1	3	24.8	0	1	1	0	1	0	0	0	1	1	0	0	0	6	0	6	22	1	23	12.25	0	3	3	6	1	5	0.5	2	2	2	avoided	0	0	0	0	0
2013_04	2013_04_04	2013_04_04_2_1	FWE	F	WE	9.34	9.34	14.38	9.34	1	1	3	24.8	0	1	1	0	1	0	0	0	1	1	0	0	0	6	0	6	22	1	23	12.25	0	3	3	6	1	5	0.5	2	2	2	grazed	0	0	0	0	0
2013_04	2013_04_04	2013_04_04_2_2	FWE	F	WE	9.34	9.34	14.38	9.34	1	1	3	24.8	0	1	1	0	1	0	0	0	1	1	0	0	0	6	0	6	22	1	23	12.25	0	3	3	6	1	5	0.5	2	2	2	avoided	0	0	0	0	0
2013_04	2013_04_04	2013_04_04_3_1	FWE	F	WE	9.34	9.34	14.38	9.34	1	1	3	24.8	0	1	1	0	1	0	0	0	1	1	0	0	0	6	0	6	22	1	23	12.25	0	3	3	6	1	5	0.5	2	2	2	grazed	0	0	0	0	0
2013_04	2013_04_04	2013_04_04_3_2	FWE	F	WE	9.34	9.34	14.38	9.34	1	1	3	24.8	0	1	1	0	1	0	0	0	1	1	0	0	0	6	0	6	22	1	23	12.25	0	3	3	6	1	5	0.5	2	2	2	avoided	0	0	0	0	0
2013_04	2013_04_04	2013_04_04_4_1	FWE	F	WE	9.34	9.34	14.38	9.34	1	1	3	24.8	0	1	1	0	1	0	0	0	1	1	0	0	0	6	0	6	22	1	23	12.25	0	3	3	6	1	5	0.5	2	2	2	grazed	0	0	0	0	0
2013_04	2013_04_04	2013_04_04_4_2	FWE	F	WE	9.34	9.34	14.38	9.34	1	1	3	24.8	0	1	1	0	1	0	0	0	1	1	0	0	0	6	0	6	22	1	23	12.25	0	3	3	6	1	5	0.5	2	2	2	avoided	0	0	0	0	0
2013_05	2013_05_01	2013_05_01_1_1	FWE	F	WE	55	55	44	55	1	1	2	0	1	0	1	1	1	0	0	0	1	0	44.625	10.375	55	19	2	21	22	2	24	5	0	0	0	6	6	0	0.833333333	4	2	15	grazed	1	0	0	0	0
2013_05	2013_05_01	2013_05_01_1_2	FWE	F	WE	55	55	44	55	1	1	2	0	1	0	1	1	1	0	0	0	1	0	44.625	10.375	55	19	2	21	22	2	24	5	0	0	0	6	6	0	0.833333333	4	2	15	avoided	1	0	0	0	0
2013_05	2013_05_01	2013_05_01_2_1	FWE	F	WE	55	55	44	55	1	1	2	0	1	0	1	1	1	0	0	0	1	0	44.625	10.375	55	19	2	21	22	2	24	5	0	0	0	6	6	0	0.833333333	4	2	15	grazed	1	0	0	0	0
2013_05	2013_05_01	2013_05_01_2_2	FWE	F	WE	55	55	44	55	1	1	2	0	1	0	1	1	1	0	0	0	1	0	44.625	10.375	55	19	2	21	22	2	24	5	0	0	0	6	6	0	0.833333333	4	2	15	avoided	1	0	0	0	0
2013_05	2013_05_01	2013_05_01_3_1	FWE	F	WE	55	55	44	55	1	1	2	0	1	0	1	1	1	0	0	0	1	0	44.625	10.375	55	19	2	21	22	2	24	5	0	0	0	6	6	0	0.833333333	4	2	15	grazed	0	0	0	0	0
2013_05	2013_05_01	2013_05_01_3_2	FWE	F	WE	55	55	44	55	1	1	2	0	1	0	1	1	1	0	0	0	1	0	44.625	10.375	55	19	2	21	22	2	24	5	0	0	0	6	6	0	0.833333333	4	2	15	avoided	1	0	0	0	0
2013_05	2013_05_01	2013_05_01_4_1	FWE	F	WE	55	55	44	55	1	1	2	0	1	0	1	1	1	0	0	0	1	0	44.625	10.375	55	19	2	21	22	2	24	5	0	0	0	6	6	0	0.833333333	4	2	15	grazed	0	0	0	0	0
2013_05	2013_05_01	2013_05_01_4_2	FWE	F	WE	55	55	44	55	1	1	2	0	1	0	1	1	1	0	0	0	1	0	44.625	10.375	55	19	2	21	22	2	24	5	0	0	0	6	6	0	0.833333333	4	2	15	avoided	0	0	0	0	0
2013_05	2013_05_02	2013_05_02_1_1	FWE	F	WE	55	55	44	55	1	1	2	0	1	0	1	1	1	0	0	0	1	0	37.25	15.875	53.125	16	2	18	22	2	24	5	0	0	0	6	5	1	0.838709677	4	1	13	grazed	0	0	0	0	0
2013_05	2013_05_02	2013_05_02_1_2	FWE	F	WE	55	55	44	55	1	1	2	0	1	0	1	1	1	0	0	0	1	0	37.25	15.875	53.125	16	2	18	22	2	24	5	0	0	0	6	5	1	0.838709677	4	1	13	avoided	1	0	0	0	0
2013_05	2013_05_02	2013_05_02_2_1	FWE	F	WE	55	55	44	55	1	1	2	0	1	0	1	1	1	0	0	0	1	0	37.25	15.875	53.125	16	2	18	22	2	24	5	0	0	0	6	5	1	0.838709677	4	1	13	grazed	1	0	0	0	0
2013_05	2013_05_02	2013_05_02_2_2	FWE	F	WE	55	55	44	55	1	1	2	0	1	0	1	1	1	0	0	0	1	0	37.25	15.875	53.125	16	2	18	22	2	24	5	0	0	0	6	5	1	0.838709677	4	1	13	avoided	1	0	0	0	0
2013_05	2013_05_02	2013_05_02_3_1	FWE	F	WE	55	55	44	55	1	1	2	0	1	0	1	1	1	0	0	0	1	0	37.25	15.875	53.125	16	2	18	22	2	24	5	0	0	0	6	5	1	0.838709677	4	1	13	grazed	0	0	0	0	0
2013_05	2013_05_02	2013_05_02_3_2	FWE	F	WE	55	55	44	55	1	1	2	0	1	0	1	1	1	0	0	0	1	0	37.25	15.875	53.125	16	2	18	22	2	24	5	0	0	0	6	5	1	0.838709677	4	1	13	avoided	0	0	0	0	0
2013_05	2013_05_02	2013_05_02_4_1	FWE	F	WE	55	55	44	55	1	1	2	0	1	0	1	1	1	0	0	0	1	0	37.25	15.875	53.125	16	2	18	22	2	24	5	0	0	0	6	5	1	0.838709677	4	1	13	grazed	1	0	0	0	0
2013_05	2013_05_02	2013_05_02_4_2	FWE	F	WE	55	55	44	55	1	1	2	0	1	0	1	1	1	0	0	0	1	0	37.25	15.875	53.125	16	2	18	22	2	24	5	0	0	0	6	5	1	0.838709677	4	1	13	avoided	1	0	0	0	0
2013_05	2013_05_03	2013_05_03_1_1	FWE	F	WE	55	55	44	55	1	1	2	0	1	0	1	1	1	0	0	0	1	1	34.125	12.125	46.25	17	2	19	22	2	24	5	0	0	0	6	6	0	0.8125	1	5	13	grazed	0	0	0	0	0
2013_05	2013_05_03	2013_05_03_1_2	FWE	F	WE	55	55	44	55	1	1	2	0	1	0	1	1	1	0	0	0	1	1	34.125	12.125	46.25	17	2	19	22	2	24	5	0	0	0	6	6	0	0.8125	1	5	13	avoided	0	0	0	0	0
2013_05	2013_05_03	2013_05_03_2_1	FWE	F	WE	55	55	44	55	1	1	2	0	1	0	1	1	1	0	0	0	1	1	34.125	12.125	46.25	17	2	19	22	2	24	5	0	0	0	6	6	0	0.8125	1	5	13	grazed	0	0	0	0	0
2013_05	2013_05_03	2013_05_03_2_2	FWE	F	WE	55	55	44	55	1	1	2	0	1	0	1	1	1	0	0	0	1	1	34.125	12.125	46.25	17	2	19	22	2	24	5	0	0	0	6	6	0	0.8125	1	5	13	avoided	1	0	0	0	0
2013_05	2013_05_03	2013_05_03_3_1	FWE	F	WE	55	55	44	55	1	1	2	0	1	0	1	1	1	0	0	0	1	1	34.125	12.125	46.25	17	2	19	22	2	24	5	0	0	0	6	6	0	0.8125	1	5	13	grazed	1	0	0	0	0
2013_05	2013_05_03	2013_05_03_3_2	FWE	F	WE	55	55	44	55	1	1	2	0	1	0	1	1	1	0	0	0	1	1	34.125	12.125	46.25	17	2	19	22	2	24	5	0	0	0	6	6	0	0.8125	1	5	13	avoided	1	0	0	0	0
2013_05	2013_05_03	2013_05_03_4_1	FWE	F	WE	55	55	44	55	1	1	2	0	1	0	1	1	1	0	0	0	1	1	34.125	12.125	46.25	17	2	19	22	2	24	5	0	0	0	6	6	0	0.8125	1	5	13	grazed	0	0	0	0	0
2013_05	2013_05_03	2013_05_03_4_2	FWE	F	WE	55	55	44	55	1	1	2	0	1	0	1	1	1	0	0	0	1	1	34.125	12.125	46.25	17	2	19	22	2	24	5	0	0	0	6	6	0	0.8125	1	5	13	avoided	0	0	0	0	0
2013_05	2013_05_04	2013_05_04_1_1	FWE	F	WE	55	55	44	55	1	1	2	0	1	0	1	1	1	0	0	0	1	1	47.25	10.875	58.125	16	2	18	22	2	24	5	0	0	0	6	4	2	0.75862069	2	5	11	grazed	0	0	0	0	0
2013_05	2013_05_04	2013_05_04_1_2	FWE	F	WE	55	55	44	55	1	1	2	0	1	0	1	1	1	0	0	0	1	1	47.25	10.875	58.125	16	2	18	22	2	24	5	0	0	0	6	4	2	0.75862069	2	5	11	avoided	0	0	0	0	0
2013_05	2013_05_04	2013_05_04_2_1	FWE	F	WE	55	55	44	55	1	1	2	0	1	0	1	1	1	0	0	0	1	1	47.25	10.875	58.125	16	2	18	22	2	24	5	0	0	0	6	4	2	0.75862069	2	5	11	grazed	0	0	0	0	0
2013_05	2013_05_04	2013_05_04_2_2	FWE	F	WE	55	55	44	55	1	1	2	0	1	0	1	1	1	0	0	0	1	1	47.25	10.875	58.125	16	2	18	22	2	24	5	0	0	0	6	4	2	0.75862069	2	5	11	avoided	0	0	0	0	0
2013_05	2013_05_04	2013_05_04_3_1	FWE	F	WE	55	55	44	55	1	1	2	0	1	0	1	1	1	0	0	0	1	1	47.25	10.875	58.125	16	2	18	22	2	24	5	0	0	0	6	4	2	0.75862069	2	5	11	grazed	0	0	0	0	0
2013_05	2013_05_04	2013_05_04_3_2	FWE	F	WE	55	55	44	55	1	1	2	0	1	0	1	1	1	0	0	0	1	1	47.25	10.875	58.125	16	2	18	22	2	24	5	0	0	0	6	4	2	0.75862069	2	5	11	avoided	0	0	0	0	0
2013_05	2013_05_04	2013_05_04_4_1	FWE	F	WE	55	55	44	55	1	1	2	0	1	0	1	1	1	0	0	0	1	1	47.25	10.875	58.125	16	2	18	22	2	24	5	0	0	0	6	4	2	0.75862069	2	5	11	grazed	0	0	0	0	0
2013_05	2013_05_04	2013_05_04_4_2	FWE	F	WE	55	55	44	55	1	1	2	0	1	0	1	1	1	0	0	0	1	1	47.25	10.875	58.125	16	2	18	22	2	24	5	0	0	0	6	4	2	0.75862069	2	5	11	avoided	0	0	0	0	0
2013_06	2013_06_01	2013_06_01_1_1	FE	F	E	40	20	62.9	40	0.5	1	1.5	20	0	1	1	1	1	0	0	0	1	0	24.375	24.375	48.75	9	1	10	17	2	19	8.25	1	3	4	7	5	2	0.571428571	2	4	4	grazed	0	0	0	0	0
2013_06	2013_06_01	2013_06_01_1_2	FE	F	E	40	20	62.9	40	0.5	1	1.5	20	0	1	1	1	1	0	0	0	1	0	24.375	24.375	48.75	9	1	10	17	2	19	8.25	1	3	4	7	5	2	0.571428571	2	4	4	avoided	0	0	0	0	0
2013_06	2013_06_01	2013_06_01_2_1	FE	F	E	40	20	62.9	40	0.5	1	1.5	20	0	1	1	1	1	0	0	0	1	0	24.375	24.375	48.75	9	1	10	17	2	19	8.25	1	3	4	7	5	2	0.571428571	2	4	4	grazed	0	0	0	0	0
2013_06	2013_06_01	2013_06_01_2_2	FE	F	E	40	20	62.9	40	0.5	1	1.5	20	0	1	1	1	1	0	0	0	1	0	24.375	24.375	48.75	9	1	10	17	2	19	8.25	1	3	4	7	5	2	0.571428571	2	4	4	avoided	0	0	0	0	0
2013_06	2013_06_01	2013_06_01_3_1	FE	F	E	40	20	62.9	40	0.5	1	1.5	20	0	1	1	1	1	0	0	0	1	0	24.375	24.375	48.75	9	1	10	17	2	19	8.25	1	3	4	7	5	2	0.571428571	2	4	4	grazed	0	0	0	0	0
2013_06	2013_06_01	2013_06_01_3_2	FE	F	E	40	20	62.9	40	0.5	1	1.5	20	0	1	1	1	1	0	0	0	1	0	24.375	24.375	48.75	9	1	10	17	2	19	8.25	1	3	4	7	5	2	0.571428571	2	4	4	avoided	0	0	0	0	0
2013_06	2013_06_01	2013_06_01_4_1	FE	F	E	40	20	62.9	40	0.5	1	1.5	20	0	1	1	1	1	0	0	0	1	0	24.375	24.375	48.75	9	1	10	17	2	19	8.25	1	3	4	7	5	2	0.571428571	2	4	4	grazed	0	0	0	0	0
2013_06	2013_06_01	2013_06_01_4_2	FE	F	E	40	20	62.9	40	0.5	1	1.5	20	0	1	1	1	1	0	0	0	1	0	24.375	24.375	48.75	9	1	10	17	2	19	8.25	1	3	4	7	5	2	0.571428571	2	4	4	avoided	0	0	0	0	0
2013_06	2013_06_02	2013_06_02_1_1	FE	F	E	40	20	62.9	40	0.5	1	1.5	20	1	1	1	1	1	0	0	0	1	0	45	18.125	63.125	11	2	13	17	2	19	8.25	2	2	4	7	4	3	0.7	2	4	7	grazed	0	0	0	0	0
2013_06	2013_06_02	2013_06_02_1_2	FE	F	E	40	20	62.9	40	0.5	1	1.5	20	1	1	1	1	1	0	0	0	1	0	45	18.125	63.125	11	2	13	17	2	19	8.25	2	2	4	7	4	3	0.7	2	4	7	avoided	0	0	0	0	0
2013_06	2013_06_02	2013_06_02_2_1	FE	F	E	40	20	62.9	40	0.5	1	1.5	20	1	1	1	1	1	0	0	0	1	0	45	18.125	63.125	11	2	13	17	2	19	8.25	2	2	4	7	4	3	0.7	2	4	7	grazed	0	0	0	0	0
2013_06	2013_06_02	2013_06_02_2_2	FE	F	E	40	20	62.9	40	0.5	1	1.5	20	1	1	1	1	1	0	0	0	1	0	45	18.125	63.125	11	2	13	17	2	19	8.25	2	2	4	7	4	3	0.7	2	4	7	avoided	0	0	0	0	0
2013_06	2013_06_02	2013_06_02_3_1	FE	F	E	40	20	62.9	40	0.5	1	1.5	20	1	1	1	1	1	0	0	0	1	0	45	18.125	63.125	11	2	13	17	2	19	8.25	2	2	4	7	4	3	0.7	2	4	7	grazed	0	0	0	0	0
2013_06	2013_06_02	2013_06_02_3_2	FE	F	E	40	20	62.9	40	0.5	1	1.5	20	1	1	1	1	1	0	0	0	1	0	45	18.125	63.125	11	2	13	17	2	19	8.25	2	2	4	7	4	3	0.7	2	4	7	avoided	0	0	0	0	0
2013_06	2013_06_02	2013_06_02_4_1	FE	F	E	40	20	62.9	40	0.5	1	1.5	20	1	1	1	1	1	0	0	0	1	0	45	18.125	63.125	11	2	13	17	2	19	8.25	2	2	4	7	4	3	0.7	2	4	7	grazed	0	0	0	0	0
2013_06	2013_06_02	2013_06_02_4_2	FE	F	E	40	20	62.9	40	0.5	1	1.5	20	1	1	1	1	1	0	0	0	1	0	45	18.125	63.125	11	2	13	17	2	19	8.25	2	2	4	7	4	3	0.7	2	4	7	avoided	0	0	0	0	0
2013_06	2013_06_03	2013_06_03_1_1	FE	F	E	40	20	62.9	40	0.5	1	1.5	20	0	1	1	1	1	0	0	0	1	1	24.375	16.25	40.625	9	1	10	17	2	19	8.25	0	4	4	7	5	2	0.666666667	2	3	5	grazed	0	0	0	0	0
2013_06	2013_06_03	2013_06_03_1_2	FE	F	E	40	20	62.9	40	0.5	1	1.5	20	0	1	1	1	1	0	0	0	1	1	24.375	16.25	40.625	9	1	10	17	2	19	8.25	0	4	4	7	5	2	0.666666667	2	3	5	avoided	0	0	0	0	0
2013_06	2013_06_03	2013_06_03_2_1	FE	F	E	40	20	62.9	40	0.5	1	1.5	20	0	1	1	1	1	0	0	0	1	1	24.375	16.25	40.625	9	1	10	17	2	19	8.25	0	4	4	7	5	2	0.666666667	2	3	5	grazed	0	0	0	0	0
2013_06	2013_06_03	2013_06_03_2_2	FE	F	E	40	20	62.9	40	0.5	1	1.5	20	0	1	1	1	1	0	0	0	1	1	24.375	16.25	40.625	9	1	10	17	2	19	8.25	0	4	4	7	5	2	0.666666667	2	3	5	avoided	0	0	0	0	0
2013_06	2013_06_03	2013_06_03_3_1	FE	F	E	40	20	62.9	40	0.5	1	1.5	20	0	1	1	1	1	0	0	0	1	1	24.375	16.25	40.625	9	1	10	17	2	19	8.25	0	4	4	7	5	2	0.666666667	2	3	5	grazed	0	0	0	0	0
2013_06	2013_06_03	2013_06_03_3_2	FE	F	E	40	20	62.9	40	0.5	1	1.5	20	0	1	1	1	1	0	0	0	1	1	24.375	16.25	40.625	9	1	10	17	2	19	8.25	0	4	4	7	5	2	0.666666667	2	3	5	avoided	0	0	0	0	0
2013_06	2013_06_03	2013_06_03_4_1	FE	F	E	40	20	62.9	40	0.5	1	1.5	20	0	1	1	1	1	0	0	0	1	1	24.375	16.25	40.625	9	1	10	17	2	19	8.25	0	4	4	7	5	2	0.666666667	2	3	5	grazed	0	0	0	0	0
2013_06	2013_06_03	2013_06_03_4_2	FE	F	E	40	20	62.9	40	0.5	1	1.5	20	0	1	1	1	1	0	0	0	1	1	24.375	16.25	40.625	9	1	10	17	2	19	8.25	0	4	4	7	5	2	0.666666667	2	3	5	avoided	0	0	0	0	0
2013_06	2013_06_04	2013_06_04_1_1	FE	F	E	40	20	62.9	40	0.5	1	1.5	20	0	1	1	1	1	0	0	0	1	1	31.875	9.375	41.25	9	1	10	17	2	19	8.25	2	2	4	7	5	2	0.571428571	3	3	4	grazed	0	0	0	0	0
2013_06	2013_06_04	2013_06_04_1_2	FE	F	E	40	20	62.9	40	0.5	1	1.5	20	0	1	1	1	1	0	0	0	1	1	31.875	9.375	41.25	9	1	10	17	2	19	8.25	2	2	4	7	5	2	0.571428571	3	3	4	avoided	0	0	0	0	0
2013_06	2013_06_04	2013_06_04_2_1	FE	F	E	40	20	62.9	40	0.5	1	1.5	20	0	1	1	1	1	0	0	0	1	1	31.875	9.375	41.25	9	1	10	17	2	19	8.25	2	2	4	7	5	2	0.571428571	3	3	4	grazed	0	0	0	0	0
2013_06	2013_06_04	2013_06_04_2_2	FE	F	E	40	20	62.9	40	0.5	1	1.5	20	0	1	1	1	1	0	0	0	1	1	31.875	9.375	41.25	9	1	10	17	2	19	8.25	2	2	4	7	5	2	0.571428571	3	3	4	avoided	0	0	0	0	0
2013_06	2013_06_04	2013_06_04_3_1	FE	F	E	40	20	62.9	40	0.5	1	1.5	20	0	1	1	1	1	0	0	0	1	1	31.875	9.375	41.25	9	1	10	17	2	19	8.25	2	2	4	7	5	2	0.571428571	3	3	4	grazed	0	0	0	0	0
2013_06	2013_06_04	2013_06_04_3_2	FE	F	E	40	20	62.9	40	0.5	1	1.5	20	0	1	1	1	1	0	0	0	1	1	31.875	9.375	41.25	9	1	10	17	2	19	8.25	2	2	4	7	5	2	0.571428571	3	3	4	avoided	0	0	0	0	0
2013_06	2013_06_04	2013_06_04_4_1	FE	F	E	40	20	62.9	40	0.5	1	1.5	20	0	1	1	1	1	0	0	0	1	1	31.875	9.375	41.25	9	1	10	17	2	19	8.25	2	2	4	7	5	2	0.571428571	3	3	4	grazed	0	0	0	0	0
2013_06	2013_06_04	2013_06_04_4_2	FE	F	E	40	20	62.9	40	0.5	1	1.5	20	0	1	1	1	1	0	0	0	1	1	31.875	9.375	41.25	9	1	10	17	2	19	8.25	2	2	4	7	5	2	0.571428571	3	3	4	avoided	0	0	0	0	0
2013_08	2013_08_01	2013_08_01_1_1	FWE	F	WE	20	20	35.4	20	1	1	2.5	0	0	0	1	1	1	0	0	0	0	1	10.5	4.625	15.125	16	1	17	20	1	21	8.5	2	0	2	10	9	1	0.583333333	5	5	7	grazed	1	0	0	0	0
2013_08	2013_08_01	2013_08_01_1_2	FWE	F	WE	20	20	35.4	20	1	1	2.5	0	0	0	1	1	1	0	0	0	0	1	10.5	4.625	15.125	16	1	17	20	1	21	8.5	2	0	2	10	9	1	0.583333333	5	5	7	avoided	0	0	0	0	0
2013_08	2013_08_01	2013_08_01_2_1	FWE	F	WE	20	20	35.4	20	1	1	2.5	0	0	0	1	1	1	0	0	0	0	1	10.5	4.625	15.125	16	1	17	20	1	21	8.5	2	0	2	10	9	1	0.583333333	5	5	7	grazed	0	0	0	0	0
2013_08	2013_08_01	2013_08_01_2_2	FWE	F	WE	20	20	35.4	20	1	1	2.5	0	0	0	1	1	1	0	0	0	0	1	10.5	4.625	15.125	16	1	17	20	1	21	8.5	2	0	2	10	9	1	0.583333333	5	5	7	avoided	0	0	0	0	0
2013_08	2013_08_01	2013_08_01_3_1	FWE	F	WE	20	20	35.4	20	1	1	2.5	0	0	0	1	1	1	0	0	0	0	1	10.5	4.625	15.125	16	1	17	20	1	21	8.5	2	0	2	10	9	1	0.583333333	5	5	7	grazed	0	0	0	0	0
2013_08	2013_08_01	2013_08_01_3_2	FWE	F	WE	20	20	35.4	20	1	1	2.5	0	0	0	1	1	1	0	0	0	0	1	10.5	4.625	15.125	16	1	17	20	1	21	8.5	2	0	2	10	9	1	0.583333333	5	5	7	avoided	0	0	0	0	0
2013_08	2013_08_01	2013_08_01_4_1	FWE	F	WE	20	20	35.4	20	1	1	2.5	0	0	0	1	1	1	0	0	0	0	1	10.5	4.625	15.125	16	1	17	20	1	21	8.5	2	0	2	10	9	1	0.583333333	5	5	7	grazed	0	0	0	0	0
2013_08	2013_08_01	2013_08_01_4_2	FWE	F	WE	20	20	35.4	20	1	1	2.5	0	0	0	1	1	1	0	0	0	0	1	10.5	4.625	15.125	16	1	17	20	1	21	8.5	2	0	2	10	9	1	0.583333333	5	5	7	avoided	0	0	0	0	0
2013_08	2013_08_02	2013_08_02_1_1	FWE	F	WE	20	20	35.4	20	1	1	2.5	0	0	0	1	1	1	0	0	0	0	0	21.875	3.125	25	10	1	11	20	1	21	8.5	0	2	2	10	4	6	0.625	3	3	5	grazed	0	0	0	0	0
2013_08	2013_08_02	2013_08_02_1_2	FWE	F	WE	20	20	35.4	20	1	1	2.5	0	0	0	1	1	1	0	0	0	0	0	21.875	3.125	25	10	1	11	20	1	21	8.5	0	2	2	10	4	6	0.625	3	3	5	avoided	1	0	0	0	0
2013_08	2013_08_02	2013_08_02_2_1	FWE	F	WE	20	20	35.4	20	1	1	2.5	0	0	0	1	1	1	0	0	0	0	0	21.875	3.125	25	10	1	11	20	1	21	8.5	0	2	2	10	4	6	0.625	3	3	5	grazed	0	0	0	0	0
2013_08	2013_08_02	2013_08_02_2_2	FWE	F	WE	20	20	35.4	20	1	1	2.5	0	0	0	1	1	1	0	0	0	0	0	21.875	3.125	25	10	1	11	20	1	21	8.5	0	2	2	10	4	6	0.625	3	3	5	avoided	0	0	0	0	0
2013_08	2013_08_02	2013_08_02_3_1	FWE	F	WE	20	20	35.4	20	1	1	2.5	0	0	0	1	1	1	0	0	0	0	0	21.875	3.125	25	10	1	11	20	1	21	8.5	0	2	2	10	4	6	0.625	3	3	5	grazed	1	0	0	0	0
2013_08	2013_08_02	2013_08_02_3_2	FWE	F	WE	20	20	35.4	20	1	1	2.5	0	0	0	1	1	1	0	0	0	0	0	21.875	3.125	25	10	1	11	20	1	21	8.5	0	2	2	10	4	6	0.625	3	3	5	avoided	0	0	0	0	0
2013_08	2013_08_02	2013_08_02_4_1	FWE	F	WE	20	20	35.4	20	1	1	2.5	0	0	0	1	1	1	0	0	0	0	0	21.875	3.125	25	10	1	11	20	1	21	8.5	0	2	2	10	4	6	0.625	3	3	5	grazed	0	0	0	0	0
2013_08	2013_08_02	2013_08_02_4_2	FWE	F	WE	20	20	35.4	20	1	1	2.5	0	0	0	1	1	1	0	0	0	0	0	21.875	3.125	25	10	1	11	20	1	21	8.5	0	2	2	10	4	6	0.625	3	3	5	avoided	0	0	0	0	0
2013_08	2013_08_03	2013_08_03_1_1	FWE	F	WE	20	20	35.4	20	1	1	2.5	0	0	0	1	1	1	0	0	0	0	1	4	1.25	5.25	10	1	11	20	1	21	8.5	0	2	2	10	5	5	0.533333333	3	4	4	grazed	0	0	0	0	0
2013_08	2013_08_03	2013_08_03_1_2	FWE	F	WE	20	20	35.4	20	1	1	2.5	0	0	0	1	1	1	0	0	0	0	1	4	1.25	5.25	10	1	11	20	1	21	8.5	0	2	2	10	5	5	0.533333333	3	4	4	avoided	0	0	0	0	0
2013_08	2013_08_03	2013_08_03_2_1	FWE	F	WE	20	20	35.4	20	1	1	2.5	0	0	0	1	1	1	0	0	0	0	1	4	1.25	5.25	10	1	11	20	1	21	8.5	0	2	2	10	5	5	0.533333333	3	4	4	grazed	0	0	0	0	0
2013_08	2013_08_03	2013_08_03_2_2	FWE	F	WE	20	20	35.4	20	1	1	2.5	0	0	0	1	1	1	0	0	0	0	1	4	1.25	5.25	10	1	11	20	1	21	8.5	0	2	2	10	5	5	0.533333333	3	4	4	avoided	0	0	0	0	0
2013_08	2013_08_03	2013_08_03_3_1	FWE	F	WE	20	20	35.4	20	1	1	2.5	0	0	0	1	1	1	0	0	0	0	1	4	1.25	5.25	10	1	11	20	1	21	8.5	0	2	2	10	5	5	0.533333333	3	4	4	grazed	0	0	0	0	0
2013_08	2013_08_03	2013_08_03_3_2	FWE	F	WE	20	20	35.4	20	1	1	2.5	0	0	0	1	1	1	0	0	0	0	1	4	1.25	5.25	10	1	11	20	1	21	8.5	0	2	2	10	5	5	0.533333333	3	4	4	avoided	0	0	0	0	0
2013_08	2013_08_03	2013_08_03_4_1	FWE	F	WE	20	20	35.4	20	1	1	2.5	0	0	0	1	1	1	0	0	0	0	1	4	1.25	5.25	10	1	11	20	1	21	8.5	0	2	2	10	5	5	0.533333333	3	4	4	grazed	0	0	0	0	0
2013_08	2013_08_03	2013_08_03_4_2	FWE	F	WE	20	20	35.4	20	1	1	2.5	0	0	0	1	1	1	0	0	0	0	1	4	1.25	5.25	10	1	11	20	1	21	8.5	0	2	2	10	5	5	0.533333333	3	4	4	avoided	0	0	0	0	0
2013_08	2013_08_04	2013_08_04_1_1	FWE	F	WE	20	20	35.4	20	1	1	2.5	0	0	0	1	1	1	0	0	0	0	0	3.625	0.375	4	10	1	11	20	1	21	8.5	1	1	2	10	6	4	0.166666667	6	4	1	grazed	0	0	0	0	0
2013_08	2013_08_04	2013_08_04_1_2	FWE	F	WE	20	20	35.4	20	1	1	2.5	0	0	0	1	1	1	0	0	0	0	0	3.625	0.375	4	10	1	11	20	1	21	8.5	1	1	2	10	6	4	0.166666667	6	4	1	avoided	0	0	0	0	0
2013_08	2013_08_04	2013_08_04_2_1	FWE	F	WE	20	20	35.4	20	1	1	2.5	0	0	0	1	1	1	0	0	0	0	0	3.625	0.375	4	10	1	11	20	1	21	8.5	1	1	2	10	6	4	0.166666667	6	4	1	grazed	0	0	0	0	0
2013_08	2013_08_04	2013_08_04_2_2	FWE	F	WE	20	20	35.4	20	1	1	2.5	0	0	0	1	1	1	0	0	0	0	0	3.625	0.375	4	10	1	11	20	1	21	8.5	1	1	2	10	6	4	0.166666667	6	4	1	avoided	0	0	0	0	0
2013_08	2013_08_04	2013_08_04_3_1	FWE	F	WE	20	20	35.4	20	1	1	2.5	0	0	0	1	1	1	0	0	0	0	0	3.625	0.375	4	10	1	11	20	1	21	8.5	1	1	2	10	6	4	0.166666667	6	4	1	grazed	0	0	0	0	0
2013_08	2013_08_04	2013_08_04_3_2	FWE	F	WE	20	20	35.4	20	1	1	2.5	0	0	0	1	1	1	0	0	0	0	0	3.625	0.375	4	10	1	11	20	1	21	8.5	1	1	2	10	6	4	0.166666667	6	4	1	avoided	0	0	0	0	0
2013_08	2013_08_04	2013_08_04_4_1	FWE	F	WE	20	20	35.4	20	1	1	2.5	0	0	0	1	1	1	0	0	0	0	0	3.625	0.375	4	10	1	11	20	1	21	8.5	1	1	2	10	6	4	0.166666667	6	4	1	grazed	0	0	0	0	0
2013_08	2013_08_04	2013_08_04_4_2	FWE	F	WE	20	20	35.4	20	1	1	2.5	0	0	0	1	1	1	0	0	0	0	0	3.625	0.375	4	10	1	11	20	1	21	8.5	1	1	2	10	6	4	0.166666667	6	4	1	avoided	0	0	0	0	0
2013_09	2013_09_01	2013_09_01_1_1	FWE	F	WE	300	200	160	250	0.666666667	0.833333333	4	0	1	0	1	1	1	0	0	0	1	0	24.375	11.875	36.25	13	2	15	19	3	22	7.25	1	0	1	6	3	3	0.571428571	6	3	6	grazed	0	0	0	0	0
2013_09	2013_09_01	2013_09_01_1_2	FWE	F	WE	300	200	160	250	0.666666667	0.833333333	4	0	1	0	1	1	1	0	0	0	1	0	24.375	11.875	36.25	13	2	15	19	3	22	7.25	1	0	1	6	3	3	0.571428571	6	3	6	avoided	1	0	0	0	0
2013_09	2013_09_01	2013_09_01_2_1	FWE	F	WE	300	200	160	250	0.666666667	0.833333333	4	0	1	0	1	1	1	0	0	0	1	0	24.375	11.875	36.25	13	2	15	19	3	22	7.25	1	0	1	6	3	3	0.571428571	6	3	6	grazed	0	0	0	0	0
2013_09	2013_09_01	2013_09_01_2_2	FWE	F	WE	300	200	160	250	0.666666667	0.833333333	4	0	1	0	1	1	1	0	0	0	1	0	24.375	11.875	36.25	13	2	15	19	3	22	7.25	1	0	1	6	3	3	0.571428571	6	3	6	avoided	0	0	0	0	0
2013_09	2013_09_01	2013_09_01_3_1	FWE	F	WE	300	200	160	250	0.666666667	0.833333333	4	0	1	0	1	1	1	0	0	0	1	0	24.375	11.875	36.25	13	2	15	19	3	22	7.25	1	0	1	6	3	3	0.571428571	6	3	6	grazed	1	0	0	0	0
2013_09	2013_09_01	2013_09_01_3_2	FWE	F	WE	300	200	160	250	0.666666667	0.833333333	4	0	1	0	1	1	1	0	0	0	1	0	24.375	11.875	36.25	13	2	15	19	3	22	7.25	1	0	1	6	3	3	0.571428571	6	3	6	avoided	1	0	0	0	0
2013_09	2013_09_01	2013_09_01_4_1	FWE	F	WE	300	200	160	250	0.666666667	0.833333333	4	0	1	0	1	1	1	0	0	0	1	0	24.375	11.875	36.25	13	2	15	19	3	22	7.25	1	0	1	6	3	3	0.571428571	6	3	6	grazed	0	0	0	0	0
2013_09	2013_09_01	2013_09_01_4_2	FWE	F	WE	300	200	160	250	0.666666667	0.833333333	4	0	1	0	1	1	1	0	0	0	1	0	24.375	11.875	36.25	13	2	15	19	3	22	7.25	1	0	1	6	3	3	0.571428571	6	3	6	avoided	0	0	0	0	0
2013_09	2013_09_02	2013_09_02_1_1	FWE	F	WE	300	200	160	250	0.666666667	0.833333333	4	0	1	0	1	1	1	0	0	0	1	0	26.125	23.375	49.5	12	2	14	19	3	22	7.25	1	0	1	6	3	3	0.6	4	4	6	grazed	0	0	0	0	0
2013_09	2013_09_02	2013_09_02_1_2	FWE	F	WE	300	200	160	250	0.666666667	0.833333333	4	0	1	0	1	1	1	0	0	0	1	0	26.125	23.375	49.5	12	2	14	19	3	22	7.25	1	0	1	6	3	3	0.6	4	4	6	avoided	0	0	0	0	0
2013_09	2013_09_02	2013_09_02_2_1	FWE	F	WE	300	200	160	250	0.666666667	0.833333333	4	0	1	0	1	1	1	0	0	0	1	0	26.125	23.375	49.5	12	2	14	19	3	22	7.25	1	0	1	6	3	3	0.6	4	4	6	grazed	0	0	0	0	0
2013_09	2013_09_02	2013_09_02_2_2	FWE	F	WE	300	200	160	250	0.666666667	0.833333333	4	0	1	0	1	1	1	0	0	0	1	0	26.125	23.375	49.5	12	2	14	19	3	22	7.25	1	0	1	6	3	3	0.6	4	4	6	avoided	1	0	0	0	0
2013_09	2013_09_02	2013_09_02_3_1	FWE	F	WE	300	200	160	250	0.666666667	0.833333333	4	0	1	0	1	1	1	0	0	0	1	0	26.125	23.375	49.5	12	2	14	19	3	22	7.25	1	0	1	6	3	3	0.6	4	4	6	grazed	1	0	0	0	0
2013_09	2013_09_02	2013_09_02_3_2	FWE	F	WE	300	200	160	250	0.666666667	0.833333333	4	0	1	0	1	1	1	0	0	0	1	0	26.125	23.375	49.5	12	2	14	19	3	22	7.25	1	0	1	6	3	3	0.6	4	4	6	avoided	0	0	0	0	0
2013_09	2013_09_02	2013_09_02_4_1	FWE	F	WE	300	200	160	250	0.666666667	0.833333333	4	0	1	0	1	1	1	0	0	0	1	0	26.125	23.375	49.5	12	2	14	19	3	22	7.25	1	0	1	6	3	3	0.6	4	4	6	grazed	0	0	0	0	0
2013_09	2013_09_02	2013_09_02_4_2	FWE	F	WE	300	200	160	250	0.666666667	0.833333333	4	0	1	0	1	1	1	0	0	0	1	0	26.125	23.375	49.5	12	2	14	19	3	22	7.25	1	0	1	6	3	3	0.6	4	4	6	avoided	0	0	0	0	0
2013_09	2013_09_03	2013_09_03_1_1	FWE	F	WE	300	200	160	250	0.666666667	0.833333333	4	0	1	0	1	1	1	0	0	0	1	1	17.25	10.25	27.5	13	1	14	19	3	22	7.25	0	1	1	6	3	3	0.444444444	3	7	4	grazed	1	0	0	0	0
2013_09	2013_09_03	2013_09_03_1_2	FWE	F	WE	300	200	160	250	0.666666667	0.833333333	4	0	1	0	1	1	1	0	0	0	1	1	17.25	10.25	27.5	13	1	14	19	3	22	7.25	0	1	1	6	3	3	0.444444444	3	7	4	avoided	1	0	0	0	0
2013_09	2013_09_03	2013_09_03_2_1	FWE	F	WE	300	200	160	250	0.666666667	0.833333333	4	0	1	0	1	1	1	0	0	0	1	1	17.25	10.25	27.5	13	1	14	19	3	22	7.25	0	1	1	6	3	3	0.444444444	3	7	4	grazed	1	0	0	0	0
2013_09	2013_09_03	2013_09_03_2_2	FWE	F	WE	300	200	160	250	0.666666667	0.833333333	4	0	1	0	1	1	1	0	0	0	1	1	17.25	10.25	27.5	13	1	14	19	3	22	7.25	0	1	1	6	3	3	0.444444444	3	7	4	avoided	1	0	0	0	0
2013_09	2013_09_03	2013_09_03_3_1	FWE	F	WE	300	200	160	250	0.666666667	0.833333333	4	0	1	0	1	1	1	0	0	0	1	1	17.25	10.25	27.5	13	1	14	19	3	22	7.25	0	1	1	6	3	3	0.444444444	3	7	4	grazed	1	0	0	0	0
2013_09	2013_09_03	2013_09_03_3_2	FWE	F	WE	300	200	160	250	0.666666667	0.833333333	4	0	1	0	1	1	1	0	0	0	1	1	17.25	10.25	27.5	13	1	14	19	3	22	7.25	0	1	1	6	3	3	0.444444444	3	7	4	avoided	1	0	0	0	0
2013_09	2013_09_03	2013_09_03_4_1	FWE	F	WE	300	200	160	250	0.666666667	0.833333333	4	0	1	0	1	1	1	0	0	0	1	1	17.25	10.25	27.5	13	1	14	19	3	22	7.25	0	1	1	6	3	3	0.444444444	3	7	4	grazed	1	0	0	0	0
2013_09	2013_09_03	2013_09_03_4_2	FWE	F	WE	300	200	160	250	0.666666667	0.833333333	4	0	1	0	1	1	1	0	0	0	1	1	17.25	10.25	27.5	13	1	14	19	3	22	7.25	0	1	1	6	3	3	0.444444444	3	7	4	avoided	0	0	0	0	0
2013_09	2013_09_04	2013_09_04_1_1	FWE	F	WE	300	200	160	250	0.666666667	0.833333333	4	0	1	0	1	1	1	0	0	0	1	1	24.25	12	36.25	14	2	16	19	3	22	7.25	1	0	1	6	5	1	0.476190476	2	9	5	grazed	0	0	0	0	0
2013_09	2013_09_04	2013_09_04_1_2	FWE	F	WE	300	200	160	250	0.666666667	0.833333333	4	0	1	0	1	1	1	0	0	0	1	1	24.25	12	36.25	14	2	16	19	3	22	7.25	1	0	1	6	5	1	0.476190476	2	9	5	avoided	1	0	0	0	0
2013_09	2013_09_04	2013_09_04_2_1	FWE	F	WE	300	200	160	250	0.666666667	0.833333333	4	0	1	0	1	1	1	0	0	0	1	1	24.25	12	36.25	14	2	16	19	3	22	7.25	1	0	1	6	5	1	0.476190476	2	9	5	grazed	0	0	0	0	0
2013_09	2013_09_04	2013_09_04_2_2	FWE	F	WE	300	200	160	250	0.666666667	0.833333333	4	0	1	0	1	1	1	0	0	0	1	1	24.25	12	36.25	14	2	16	19	3	22	7.25	1	0	1	6	5	1	0.476190476	2	9	5	avoided	1	0	0	0	0
2013_09	2013_09_04	2013_09_04_3_1	FWE	F	WE	300	200	160	250	0.666666667	0.833333333	4	0	1	0	1	1	1	0	0	0	1	1	24.25	12	36.25	14	2	16	19	3	22	7.25	1	0	1	6	5	1	0.476190476	2	9	5	grazed	0	0	0	0	0
2013_09	2013_09_04	2013_09_04_3_2	FWE	F	WE	300	200	160	250	0.666666667	0.833333333	4	0	1	0	1	1	1	0	0	0	1	1	24.25	12	36.25	14	2	16	19	3	22	7.25	1	0	1	6	5	1	0.476190476	2	9	5	avoided	1	0	0	0	0
2013_09	2013_09_04	2013_09_04_4_1	FWE	F	WE	300	200	160	250	0.666666667	0.833333333	4	0	1	0	1	1	1	0	0	0	1	1	24.25	12	36.25	14	2	16	19	3	22	7.25	1	0	1	6	5	1	0.476190476	2	9	5	grazed	0	0	0	0	0
2013_09	2013_09_04	2013_09_04_4_2	FWE	F	WE	300	200	160	250	0.666666667	0.833333333	4	0	1	0	1	1	1	0	0	0	1	1	24.25	12	36.25	14	2	16	19	3	22	7.25	1	0	1	6	5	1	0.476190476	2	9	5	avoided	1	0	0	0	0
2013_10	2013_10_01	2013_10_01_1_1	P_WE	P	WE	5	5	12.5	5	1	1	0.5	100	0	0	1	0	1	0	0	1	0	1	45.25	0.875	46.125	16	1	17	21	2	23	7.5	1	0	1	9	7	2	0.380952381	5	8	4	grazed	0	0	0	0	0
2013_10	2013_10_01	2013_10_01_1_2	P_WE	P	WE	5	5	12.5	5	1	1	0.5	100	0	0	1	0	1	0	0	1	0	1	45.25	0.875	46.125	16	1	17	21	2	23	7.5	1	0	1	9	7	2	0.380952381	5	8	4	avoided	0	0	0	1	0
2013_10	2013_10_01	2013_10_01_2_1	P_WE	P	WE	5	5	12.5	5	1	1	0.5	100	0	0	1	0	1	0	0	1	0	1	45.25	0.875	46.125	16	1	17	21	2	23	7.5	1	0	1	9	7	2	0.380952381	5	8	4	grazed	1	0	0	0	0
2013_10	2013_10_01	2013_10_01_2_2	P_WE	P	WE	5	5	12.5	5	1	1	0.5	100	0	0	1	0	1	0	0	1	0	1	45.25	0.875	46.125	16	1	17	21	2	23	7.5	1	0	1	9	7	2	0.380952381	5	8	4	avoided	0	0	0	1	0
2013_10	2013_10_01	2013_10_01_3_1	P_WE	P	WE	5	5	12.5	5	1	1	0.5	100	0	0	1	0	1	0	0	1	0	1	45.25	0.875	46.125	16	1	17	21	2	23	7.5	1	0	1	9	7	2	0.380952381	5	8	4	grazed	1	0	0	0	0
2013_10	2013_10_01	2013_10_01_3_2	P_WE	P	WE	5	5	12.5	5	1	1	0.5	100	0	0	1	0	1	0	0	1	0	1	45.25	0.875	46.125	16	1	17	21	2	23	7.5	1	0	1	9	7	2	0.380952381	5	8	4	avoided	0	0	0	1	0
2013_10	2013_10_01	2013_10_01_4_1	P_WE	P	WE	5	5	12.5	5	1	1	0.5	100	0	0	1	0	1	0	0	1	0	1	45.25	0.875	46.125	16	1	17	21	2	23	7.5	1	0	1	9	7	2	0.380952381	5	8	4	grazed	0	0	0	0	0
2013_10	2013_10_01	2013_10_01_4_2	P_WE	P	WE	5	5	12.5	5	1	1	0.5	100	0	0	1	0	1	0	0	1	0	1	45.25	0.875	46.125	16	1	17	21	2	23	7.5	1	0	1	9	7	2	0.380952381	5	8	4	avoided	0	0	0	0	0
2013_10	2013_10_02	2013_10_02_1_1	P_WE	P	WE	5	5	12.5	5	1	1	0.5	100	0	1	1	0	1	0	0	1	0	1	44.5	0	44.5	14	0	14	21	2	23	7.5	0	1	1	9	5	4	0.133333333	3	10	1	grazed	0	0	0	0	0
2013_10	2013_10_02	2013_10_02_1_2	P_WE	P	WE	5	5	12.5	5	1	1	0.5	100	0	1	1	0	1	0	0	1	0	1	44.5	0	44.5	14	0	14	21	2	23	7.5	0	1	1	9	5	4	0.133333333	3	10	1	avoided	0	0	0	0	0
2013_10	2013_10_02	2013_10_02_2_1	P_WE	P	WE	5	5	12.5	5	1	1	0.5	100	0	1	1	0	1	0	0	1	0	1	44.5	0	44.5	14	0	14	21	2	23	7.5	0	1	1	9	5	4	0.133333333	3	10	1	grazed	0	0	0	0	0
2013_10	2013_10_02	2013_10_02_2_2	P_WE	P	WE	5	5	12.5	5	1	1	0.5	100	0	1	1	0	1	0	0	1	0	1	44.5	0	44.5	14	0	14	21	2	23	7.5	0	1	1	9	5	4	0.133333333	3	10	1	avoided	0	0	0	1	0
2013_10	2013_10_02	2013_10_02_3_1	P_WE	P	WE	5	5	12.5	5	1	1	0.5	100	0	1	1	0	1	0	0	1	0	1	44.5	0	44.5	14	0	14	21	2	23	7.5	0	1	1	9	5	4	0.133333333	3	10	1	grazed	0	0	0	0	0
2013_10	2013_10_02	2013_10_02_3_2	P_WE	P	WE	5	5	12.5	5	1	1	0.5	100	0	1	1	0	1	0	0	1	0	1	44.5	0	44.5	14	0	14	21	2	23	7.5	0	1	1	9	5	4	0.133333333	3	10	1	avoided	0	0	0	1	0
2013_10	2013_10_02	2013_10_02_4_1	P_WE	P	WE	5	5	12.5	5	1	1	0.5	100	0	1	1	0	1	0	0	1	0	1	44.5	0	44.5	14	0	14	21	2	23	7.5	0	1	1	9	5	4	0.133333333	3	10	1	grazed	0	0	0	0	0
2013_10	2013_10_02	2013_10_02_4_2	P_WE	P	WE	5	5	12.5	5	1	1	0.5	100	0	1	1	0	1	0	0	1	0	1	44.5	0	44.5	14	0	14	21	2	23	7.5	0	1	1	9	5	4	0.133333333	3	10	1	avoided	0	0	0	1	0
2013_10	2013_10_03	2013_10_03_1_1	P_WE	P	WE	5	5	12.5	5	1	1	0.5	100	0	1	1	0	1	0	0	1	1	0	38.5	6.5	45	15	2	17	21	2	23	7.5	0	1	1	9	5	4	0.52173913	3	8	6	grazed	0	0	0	0	0
2013_10	2013_10_03	2013_10_03_1_2	P_WE	P	WE	5	5	12.5	5	1	1	0.5	100	0	1	1	0	1	0	0	1	1	0	38.5	6.5	45	15	2	17	21	2	23	7.5	0	1	1	9	5	4	0.52173913	3	8	6	avoided	0	0	0	0	0
2013_10	2013_10_03	2013_10_03_2_1	P_WE	P	WE	5	5	12.5	5	1	1	0.5	100	0	1	1	0	1	0	0	1	1	0	38.5	6.5	45	15	2	17	21	2	23	7.5	0	1	1	9	5	4	0.52173913	3	8	6	grazed	0	0	0	0	0
2013_10	2013_10_03	2013_10_03_2_2	P_WE	P	WE	5	5	12.5	5	1	1	0.5	100	0	1	1	0	1	0	0	1	1	0	38.5	6.5	45	15	2	17	21	2	23	7.5	0	1	1	9	5	4	0.52173913	3	8	6	avoided	0	0	0	0	0
2013_10	2013_10_03	2013_10_03_3_1	P_WE	P	WE	5	5	12.5	5	1	1	0.5	100	0	1	1	0	1	0	0	1	1	0	38.5	6.5	45	15	2	17	21	2	23	7.5	0	1	1	9	5	4	0.52173913	3	8	6	grazed	0	0	0	0	0
2013_10	2013_10_03	2013_10_03_3_2	P_WE	P	WE	5	5	12.5	5	1	1	0.5	100	0	1	1	0	1	0	0	1	1	0	38.5	6.5	45	15	2	17	21	2	23	7.5	0	1	1	9	5	4	0.52173913	3	8	6	avoided	0	0	0	0	0
2013_10	2013_10_03	2013_10_03_4_1	P_WE	P	WE	5	5	12.5	5	1	1	0.5	100	0	1	1	0	1	0	0	1	1	0	38.5	6.5	45	15	2	17	21	2	23	7.5	0	1	1	9	5	4	0.52173913	3	8	6	grazed	0	0	0	0	0
2013_10	2013_10_03	2013_10_03_4_2	P_WE	P	WE	5	5	12.5	5	1	1	0.5	100	0	1	1	0	1	0	0	1	1	0	38.5	6.5	45	15	2	17	21	2	23	7.5	0	1	1	9	5	4	0.52173913	3	8	6	avoided	0	0	0	1	0
2013_10	2013_10_04	2013_10_04_1_1	P_WE	P	WE	5	5	12.5	5	1	1	0.5	100	0	1	1	0	1	0	0	1	1	0	24.625	0.625	25.25	12	2	14	21	2	23	7.5	1	0	1	9	5	4	0.352941176	3	8	3	grazed	1	0	0	0	0
2013_10	2013_10_04	2013_10_04_1_2	P_WE	P	WE	5	5	12.5	5	1	1	0.5	100	0	1	1	0	1	0	0	1	1	0	24.625	0.625	25.25	12	2	14	21	2	23	7.5	1	0	1	9	5	4	0.352941176	3	8	3	avoided	0	0	0	0	0
2013_10	2013_10_04	2013_10_04_2_1	P_WE	P	WE	5	5	12.5	5	1	1	0.5	100	0	1	1	0	1	0	0	1	1	0	24.625	0.625	25.25	12	2	14	21	2	23	7.5	1	0	1	9	5	4	0.352941176	3	8	3	grazed	0	0	0	0	0
2013_10	2013_10_04	2013_10_04_2_2	P_WE	P	WE	5	5	12.5	5	1	1	0.5	100	0	1	1	0	1	0	0	1	1	0	24.625	0.625	25.25	12	2	14	21	2	23	7.5	1	0	1	9	5	4	0.352941176	3	8	3	avoided	0	0	0	0	0
2013_10	2013_10_04	2013_10_04_3_1	P_WE	P	WE	5	5	12.5	5	1	1	0.5	100	0	1	1	0	1	0	0	1	1	0	24.625	0.625	25.25	12	2	14	21	2	23	7.5	1	0	1	9	5	4	0.352941176	3	8	3	grazed	0	0	0	0	0
2013_10	2013_10_04	2013_10_04_3_2	P_WE	P	WE	5	5	12.5	5	1	1	0.5	100	0	1	1	0	1	0	0	1	1	0	24.625	0.625	25.25	12	2	14	21	2	23	7.5	1	0	1	9	5	4	0.352941176	3	8	3	avoided	0	0	0	0	0
2013_10	2013_10_04	2013_10_04_4_1	P_WE	P	WE	5	5	12.5	5	1	1	0.5	100	0	1	1	0	1	0	0	1	1	0	24.625	0.625	25.25	12	2	14	21	2	23	7.5	1	0	1	9	5	4	0.352941176	3	8	3	grazed	0	0	0	0	0
2013_10	2013_10_04	2013_10_04_4_2	P_WE	P	WE	5	5	12.5	5	1	1	0.5	100	0	1	1	0	1	0	0	1	1	0	24.625	0.625	25.25	12	2	14	21	2	23	7.5	1	0	1	9	5	4	0.352941176	3	8	3	avoided	0	0	0	0	0
2013_12	2013_12_01	2013_12_01_1_1	FE	F	E	160	6	12	6	0.0375	0.0375	1.5	0	0	1	1	0	1	0	0	0	0	0	17.5	1.25	18.75	9	2	11	12	2	14	3.75	3	0	3	5	5	0	0.705882353	1	4	6	grazed	0	0	0	0	0
2013_12	2013_12_01	2013_12_01_1_2	FE	F	E	160	6	12	6	0.0375	0.0375	1.5	0	0	1	1	0	1	0	0	0	0	0	17.5	1.25	18.75	9	2	11	12	2	14	3.75	3	0	3	5	5	0	0.705882353	1	4	6	avoided	0	0	0	0	0
2013_12	2013_12_01	2013_12_01_2_1	FE	F	E	160	6	12	6	0.0375	0.0375	1.5	0	0	1	1	0	1	0	0	0	0	0	17.5	1.25	18.75	9	2	11	12	2	14	3.75	3	0	3	5	5	0	0.705882353	1	4	6	grazed	0	0	0	0	0
2013_12	2013_12_01	2013_12_01_2_2	FE	F	E	160	6	12	6	0.0375	0.0375	1.5	0	0	1	1	0	1	0	0	0	0	0	17.5	1.25	18.75	9	2	11	12	2	14	3.75	3	0	3	5	5	0	0.705882353	1	4	6	avoided	0	0	0	0	0
2013_12	2013_12_01	2013_12_01_3_1	FE	F	E	160	6	12	6	0.0375	0.0375	1.5	0	0	1	1	0	1	0	0	0	0	0	17.5	1.25	18.75	9	2	11	12	2	14	3.75	3	0	3	5	5	0	0.705882353	1	4	6	grazed	0	0	0	0	0
2013_12	2013_12_01	2013_12_01_3_2	FE	F	E	160	6	12	6	0.0375	0.0375	1.5	0	0	1	1	0	1	0	0	0	0	0	17.5	1.25	18.75	9	2	11	12	2	14	3.75	3	0	3	5	5	0	0.705882353	1	4	6	avoided	0	0	0	0	0
2013_12	2013_12_01	2013_12_01_4_1	FE	F	E	160	6	12	6	0.0375	0.0375	1.5	0	0	1	1	0	1	0	0	0	0	0	17.5	1.25	18.75	9	2	11	12	2	14	3.75	3	0	3	5	5	0	0.705882353	1	4	6	grazed	0	0	0	0	0
2013_12	2013_12_01	2013_12_01_4_2	FE	F	E	160	6	12	6	0.0375	0.0375	1.5	0	0	1	1	0	1	0	0	0	0	0	17.5	1.25	18.75	9	2	11	12	2	14	3.75	3	0	3	5	5	0	0.705882353	1	4	6	avoided	0	0	0	0	0
2013_12	2013_12_02	2013_12_02_1_1	FE	F	E	160	6	12	6	0.0375	0.0375	1.5	0	0	1	1	0	1	0	0	0	0	0	26.875	0.625	27.5	6	1	7	12	2	14	3.75	2	1	3	5	4	1	0.727272727	1	2	4	grazed	0	0	0	0	0
2013_12	2013_12_02	2013_12_02_1_2	FE	F	E	160	6	12	6	0.0375	0.0375	1.5	0	0	1	1	0	1	0	0	0	0	0	26.875	0.625	27.5	6	1	7	12	2	14	3.75	2	1	3	5	4	1	0.727272727	1	2	4	avoided	0	0	0	0	0
2013_12	2013_12_02	2013_12_02_2_1	FE	F	E	160	6	12	6	0.0375	0.0375	1.5	0	0	1	1	0	1	0	0	0	0	0	26.875	0.625	27.5	6	1	7	12	2	14	3.75	2	1	3	5	4	1	0.727272727	1	2	4	grazed	0	0	0	0	0
2013_12	2013_12_02	2013_12_02_2_2	FE	F	E	160	6	12	6	0.0375	0.0375	1.5	0	0	1	1	0	1	0	0	0	0	0	26.875	0.625	27.5	6	1	7	12	2	14	3.75	2	1	3	5	4	1	0.727272727	1	2	4	avoided	0	0	0	0	0
2013_12	2013_12_02	2013_12_02_3_1	FE	F	E	160	6	12	6	0.0375	0.0375	1.5	0	0	1	1	0	1	0	0	0	0	0	26.875	0.625	27.5	6	1	7	12	2	14	3.75	2	1	3	5	4	1	0.727272727	1	2	4	grazed	0	0	0	0	0
2013_12	2013_12_02	2013_12_02_3_2	FE	F	E	160	6	12	6	0.0375	0.0375	1.5	0	0	1	1	0	1	0	0	0	0	0	26.875	0.625	27.5	6	1	7	12	2	14	3.75	2	1	3	5	4	1	0.727272727	1	2	4	avoided	0	0	0	0	0
2013_12	2013_12_02	2013_12_02_4_1	FE	F	E	160	6	12	6	0.0375	0.0375	1.5	0	0	1	1	0	1	0	0	0	0	0	26.875	0.625	27.5	6	1	7	12	2	14	3.75	2	1	3	5	4	1	0.727272727	1	2	4	grazed	0	0	0	0	0
2013_12	2013_12_02	2013_12_02_4_2	FE	F	E	160	6	12	6	0.0375	0.0375	1.5	0	0	1	1	0	1	0	0	0	0	0	26.875	0.625	27.5	6	1	7	12	2	14	3.75	2	1	3	5	4	1	0.727272727	1	2	4	avoided	0	0	0	0	0
2013_12	2013_12_03	2013_12_03_1_1	FE	F	E	160	6	12	6	0.0375	0.0375	1.5	0	0	1	1	0	1	0	0	0	0	1	18.25	1.125	19.375	9	2	11	12	2	14	3.75	2	1	3	5	5	0	0.625	2	4	5	grazed	0	0	0	0	0
2013_12	2013_12_03	2013_12_03_1_2	FE	F	E	160	6	12	6	0.0375	0.0375	1.5	0	0	1	1	0	1	0	0	0	0	1	18.25	1.125	19.375	9	2	11	12	2	14	3.75	2	1	3	5	5	0	0.625	2	4	5	avoided	0	0	0	0	0
2013_12	2013_12_03	2013_12_03_2_1	FE	F	E	160	6	12	6	0.0375	0.0375	1.5	0	0	1	1	0	1	0	0	0	0	1	18.25	1.125	19.375	9	2	11	12	2	14	3.75	2	1	3	5	5	0	0.625	2	4	5	grazed	0	0	0	0	0
2013_12	2013_12_03	2013_12_03_2_2	FE	F	E	160	6	12	6	0.0375	0.0375	1.5	0	0	1	1	0	1	0	0	0	0	1	18.25	1.125	19.375	9	2	11	12	2	14	3.75	2	1	3	5	5	0	0.625	2	4	5	avoided	0	0	0	0	0
2013_12	2013_12_03	2013_12_03_3_1	FE	F	E	160	6	12	6	0.0375	0.0375	1.5	0	0	1	1	0	1	0	0	0	0	1	18.25	1.125	19.375	9	2	11	12	2	14	3.75	2	1	3	5	5	0	0.625	2	4	5	grazed	0	0	0	0	0
2013_12	2013_12_03	2013_12_03_3_2	FE	F	E	160	6	12	6	0.0375	0.0375	1.5	0	0	1	1	0	1	0	0	0	0	1	18.25	1.125	19.375	9	2	11	12	2	14	3.75	2	1	3	5	5	0	0.625	2	4	5	avoided	0	0	0	0	0
2013_12	2013_12_03	2013_12_03_4_1	FE	F	E	160	6	12	6	0.0375	0.0375	1.5	0	0	1	1	0	1	0	0	0	0	1	18.25	1.125	19.375	9	2	11	12	2	14	3.75	2	1	3	5	5	0	0.625	2	4	5	grazed	0	0	0	0	0
2013_12	2013_12_03	2013_12_03_4_2	FE	F	E	160	6	12	6	0.0375	0.0375	1.5	0	0	1	1	0	1	0	0	0	0	1	18.25	1.125	19.375	9	2	11	12	2	14	3.75	2	1	3	5	5	0	0.625	2	4	5	avoided	0	0	0	0	0
2013_12	2013_12_04	2013_12_04_1_1	FE	F	E	160	6	12	6	0.0375	0.0375	1.5	0	0	1	1	0	1	0	0	0	0	1	19.75	0.875	20.625	11	1	12	12	2	14	3.75	1	2	3	5	5	0	0.5	3	5	4	grazed	0	0	0	0	0
2013_12	2013_12_04	2013_12_04_1_2	FE	F	E	160	6	12	6	0.0375	0.0375	1.5	0	0	1	1	0	1	0	0	0	0	1	19.75	0.875	20.625	11	1	12	12	2	14	3.75	1	2	3	5	5	0	0.5	3	5	4	avoided	0	0	0	0	0
2013_12	2013_12_04	2013_12_04_2_1	FE	F	E	160	6	12	6	0.0375	0.0375	1.5	0	0	1	1	0	1	0	0	0	0	1	19.75	0.875	20.625	11	1	12	12	2	14	3.75	1	2	3	5	5	0	0.5	3	5	4	grazed	0	0	0	0	0
2013_12	2013_12_04	2013_12_04_2_2	FE	F	E	160	6	12	6	0.0375	0.0375	1.5	0	0	1	1	0	1	0	0	0	0	1	19.75	0.875	20.625	11	1	12	12	2	14	3.75	1	2	3	5	5	0	0.5	3	5	4	avoided	0	0	0	0	0
2013_12	2013_12_04	2013_12_04_3_1	FE	F	E	160	6	12	6	0.0375	0.0375	1.5	0	0	1	1	0	1	0	0	0	0	1	19.75	0.875	20.625	11	1	12	12	2	14	3.75	1	2	3	5	5	0	0.5	3	5	4	grazed	0	0	0	0	0
2013_12	2013_12_04	2013_12_04_3_2	FE	F	E	160	6	12	6	0.0375	0.0375	1.5	0	0	1	1	0	1	0	0	0	0	1	19.75	0.875	20.625	11	1	12	12	2	14	3.75	1	2	3	5	5	0	0.5	3	5	4	avoided	0	0	0	0	0
2013_12	2013_12_04	2013_12_04_4_1	FE	F	E	160	6	12	6	0.0375	0.0375	1.5	0	0	1	1	0	1	0	0	0	0	1	19.75	0.875	20.625	11	1	12	12	2	14	3.75	1	2	3	5	5	0	0.5	3	5	4	grazed	0	0	0	0	0
2013_12	2013_12_04	2013_12_04_4_2	FE	F	E	160	6	12	6	0.0375	0.0375	1.5	0	0	1	1	0	1	0	0	0	0	1	19.75	0.875	20.625	11	1	12	12	2	14	3.75	1	2	3	5	5	0	0.5	3	5	4	avoided	0	0	0	0	0
NA	2013_13_01	2013_13_01_1_1	NA	NA	NA	NA	NA	NA	NA	NA	NA	NA	NA	NA	NA	NA	NA	NA	NA	NA	NA	NA	NA	NA	NA	NA	NA	NA	NA	NA	NA	NA	NA	NA	NA	NA	NA	NA	NA	NA	NA	NA	NA	grazed	0	0	0	0	0
NA	2013_13_01	2013_13_01_1_2	NA	NA	NA	NA	NA	NA	NA	NA	NA	NA	NA	NA	NA	NA	NA	NA	NA	NA	NA	NA	NA	NA	NA	NA	NA	NA	NA	NA	NA	NA	NA	NA	NA	NA	NA	NA	NA	NA	NA	NA	NA	avoided	0	0	0	0	0
NA	2013_13_01	2013_13_01_2_1	NA	NA	NA	NA	NA	NA	NA	NA	NA	NA	NA	NA	NA	NA	NA	NA	NA	NA	NA	NA	NA	NA	NA	NA	NA	NA	NA	NA	NA	NA	NA	NA	NA	NA	NA	NA	NA	NA	NA	NA	NA	grazed	0	0	0	0	0
NA	2013_13_01	2013_13_01_2_2	NA	NA	NA	NA	NA	NA	NA	NA	NA	NA	NA	NA	NA	NA	NA	NA	NA	NA	NA	NA	NA	NA	NA	NA	NA	NA	NA	NA	NA	NA	NA	NA	NA	NA	NA	NA	NA	NA	NA	NA	NA	avoided	0	0	0	0	0
NA	2013_13_01	2013_13_01_3_1	NA	NA	NA	NA	NA	NA	NA	NA	NA	NA	NA	NA	NA	NA	NA	NA	NA	NA	NA	NA	NA	NA	NA	NA	NA	NA	NA	NA	NA	NA	NA	NA	NA	NA	NA	NA	NA	NA	NA	NA	NA	grazed	0	0	0	0	0
NA	2013_13_01	2013_13_01_3_2	NA	NA	NA	NA	NA	NA	NA	NA	NA	NA	NA	NA	NA	NA	NA	NA	NA	NA	NA	NA	NA	NA	NA	NA	NA	NA	NA	NA	NA	NA	NA	NA	NA	NA	NA	NA	NA	NA	NA	NA	NA	avoided	0	0	0	0	0
NA	2013_13_01	2013_13_01_4_1	NA	NA	NA	NA	NA	NA	NA	NA	NA	NA	NA	NA	NA	NA	NA	NA	NA	NA	NA	NA	NA	NA	NA	NA	NA	NA	NA	NA	NA	NA	NA	NA	NA	NA	NA	NA	NA	NA	NA	NA	NA	grazed	0	0	0	0	0
NA	2013_13_01	2013_13_01_4_2	NA	NA	NA	NA	NA	NA	NA	NA	NA	NA	NA	NA	NA	NA	NA	NA	NA	NA	NA	NA	NA	NA	NA	NA	NA	NA	NA	NA	NA	NA	NA	NA	NA	NA	NA	NA	NA	NA	NA	NA	NA	avoided	0	0	0	0	0
NA	2013_13_02	2013_13_02_1_1	NA	NA	NA	NA	NA	NA	NA	NA	NA	NA	NA	NA	NA	NA	NA	NA	NA	NA	NA	NA	NA	NA	NA	NA	NA	NA	NA	NA	NA	NA	NA	NA	NA	NA	NA	NA	NA	NA	NA	NA	NA	grazed	0	0	0	0	0
NA	2013_13_02	2013_13_02_1_2	NA	NA	NA	NA	NA	NA	NA	NA	NA	NA	NA	NA	NA	NA	NA	NA	NA	NA	NA	NA	NA	NA	NA	NA	NA	NA	NA	NA	NA	NA	NA	NA	NA	NA	NA	NA	NA	NA	NA	NA	NA	avoided	0	0	0	0	0
NA	2013_13_02	2013_13_02_2_1	NA	NA	NA	NA	NA	NA	NA	NA	NA	NA	NA	NA	NA	NA	NA	NA	NA	NA	NA	NA	NA	NA	NA	NA	NA	NA	NA	NA	NA	NA	NA	NA	NA	NA	NA	NA	NA	NA	NA	NA	NA	grazed	0	0	0	0	0
NA	2013_13_02	2013_13_02_2_2	NA	NA	NA	NA	NA	NA	NA	NA	NA	NA	NA	NA	NA	NA	NA	NA	NA	NA	NA	NA	NA	NA	NA	NA	NA	NA	NA	NA	NA	NA	NA	NA	NA	NA	NA	NA	NA	NA	NA	NA	NA	avoided	0	0	0	0	0
NA	2013_13_02	2013_13_02_3_1	NA	NA	NA	NA	NA	NA	NA	NA	NA	NA	NA	NA	NA	NA	NA	NA	NA	NA	NA	NA	NA	NA	NA	NA	NA	NA	NA	NA	NA	NA	NA	NA	NA	NA	NA	NA	NA	NA	NA	NA	NA	grazed	0	0	0	0	0
NA	2013_13_02	2013_13_02_3_2	NA	NA	NA	NA	NA	NA	NA	NA	NA	NA	NA	NA	NA	NA	NA	NA	NA	NA	NA	NA	NA	NA	NA	NA	NA	NA	NA	NA	NA	NA	NA	NA	NA	NA	NA	NA	NA	NA	NA	NA	NA	avoided	0	0	0	0	0
NA	2013_13_02	2013_13_02_4_1	NA	NA	NA	NA	NA	NA	NA	NA	NA	NA	NA	NA	NA	NA	NA	NA	NA	NA	NA	NA	NA	NA	NA	NA	NA	NA	NA	NA	NA	NA	NA	NA	NA	NA	NA	NA	NA	NA	NA	NA	NA	grazed	0	0	0	0	0
NA	2013_13_02	2013_13_02_4_2	NA	NA	NA	NA	NA	NA	NA	NA	NA	NA	NA	NA	NA	NA	NA	NA	NA	NA	NA	NA	NA	NA	NA	NA	NA	NA	NA	NA	NA	NA	NA	NA	NA	NA	NA	NA	NA	NA	NA	NA	NA	avoided	0	0	0	0	0
2013_13	2013_13_03	2013_13_03_1_1	P_WE	P	WE	29.5	29.5	28	29.5	1	1	1	0	1	1	1	1	1	1	1	0	0	0	41.25	18.125	59.375	5	1	6	7	2	9	3.5	1	1	2	3	2	1	0.285714286	4	1	1	grazed	0	0	0	0	0
2013_13	2013_13_03	2013_13_03_1_2	P_WE	P	WE	29.5	29.5	28	29.5	1	1	1	0	1	1	1	1	1	1	1	0	0	0	41.25	18.125	59.375	5	1	6	7	2	9	3.5	1	1	2	3	2	1	0.285714286	4	1	1	avoided	0	0	0	0	0
2013_13	2013_13_03	2013_13_03_2_1	P_WE	P	WE	29.5	29.5	28	29.5	1	1	1	0	1	1	1	1	1	1	1	0	0	0	41.25	18.125	59.375	5	1	6	7	2	9	3.5	1	1	2	3	2	1	0.285714286	4	1	1	grazed	0	0	0	0	0
2013_13	2013_13_03	2013_13_03_2_2	P_WE	P	WE	29.5	29.5	28	29.5	1	1	1	0	1	1	1	1	1	1	1	0	0	0	41.25	18.125	59.375	5	1	6	7	2	9	3.5	1	1	2	3	2	1	0.285714286	4	1	1	avoided	0	0	0	0	0
2013_13	2013_13_03	2013_13_03_3_1	P_WE	P	WE	29.5	29.5	28	29.5	1	1	1	0	1	1	1	1	1	1	1	0	0	0	41.25	18.125	59.375	5	1	6	7	2	9	3.5	1	1	2	3	2	1	0.285714286	4	1	1	grazed	0	0	0	0	0
2013_13	2013_13_03	2013_13_03_3_2	P_WE	P	WE	29.5	29.5	28	29.5	1	1	1	0	1	1	1	1	1	1	1	0	0	0	41.25	18.125	59.375	5	1	6	7	2	9	3.5	1	1	2	3	2	1	0.285714286	4	1	1	avoided	0	0	0	0	0
2013_13	2013_13_03	2013_13_03_4_1	P_WE	P	WE	29.5	29.5	28	29.5	1	1	1	0	1	1	1	1	1	1	1	0	0	0	41.25	18.125	59.375	5	1	6	7	2	9	3.5	1	1	2	3	2	1	0.285714286	4	1	1	grazed	0	0	0	0	0
2013_13	2013_13_03	2013_13_03_4_2	P_WE	P	WE	29.5	29.5	28	29.5	1	1	1	0	1	1	1	1	1	1	1	0	0	0	41.25	18.125	59.375	5	1	6	7	2	9	3.5	1	1	2	3	2	1	0.285714286	4	1	1	avoided	0	0	0	0	0
2013_13	2013_13_04	2013_13_04_1_1	P_WE	P	WE	29.5	29.5	28	29.5	1	1	1	0	1	1	1	1	1	1	1	0	0	0	32.5	17.5	50	6	1	7	7	2	9	3.5	1	1	2	3	3	0	0.6	2	2	3	grazed	0	0	0	0	0
2013_13	2013_13_04	2013_13_04_1_2	P_WE	P	WE	29.5	29.5	28	29.5	1	1	1	0	1	1	1	1	1	1	1	0	0	0	32.5	17.5	50	6	1	7	7	2	9	3.5	1	1	2	3	3	0	0.6	2	2	3	avoided	0	0	0	0	0
2013_13	2013_13_04	2013_13_04_2_1	P_WE	P	WE	29.5	29.5	28	29.5	1	1	1	0	1	1	1	1	1	1	1	0	0	0	32.5	17.5	50	6	1	7	7	2	9	3.5	1	1	2	3	3	0	0.6	2	2	3	grazed	0	0	0	0	0
2013_13	2013_13_04	2013_13_04_2_2	P_WE	P	WE	29.5	29.5	28	29.5	1	1	1	0	1	1	1	1	1	1	1	0	0	0	32.5	17.5	50	6	1	7	7	2	9	3.5	1	1	2	3	3	0	0.6	2	2	3	avoided	0	0	0	0	0
2013_13	2013_13_04	2013_13_04_3_1	P_WE	P	WE	29.5	29.5	28	29.5	1	1	1	0	1	1	1	1	1	1	1	0	0	0	32.5	17.5	50	6	1	7	7	2	9	3.5	1	1	2	3	3	0	0.6	2	2	3	grazed	0	0	0	0	0
2013_13	2013_13_04	2013_13_04_3_2	P_WE	P	WE	29.5	29.5	28	29.5	1	1	1	0	1	1	1	1	1	1	1	0	0	0	32.5	17.5	50	6	1	7	7	2	9	3.5	1	1	2	3	3	0	0.6	2	2	3	avoided	0	0	0	0	0
2013_13	2013_13_04	2013_13_04_4_1	P_WE	P	WE	29.5	29.5	28	29.5	1	1	1	0	1	1	1	1	1	1	1	0	0	0	32.5	17.5	50	6	1	7	7	2	9	3.5	1	1	2	3	3	0	0.6	2	2	3	grazed	0	0	0	0	0
2013_13	2013_13_04	2013_13_04_4_2	P_WE	P	WE	29.5	29.5	28	29.5	1	1	1	0	1	1	1	1	1	1	1	0	0	0	32.5	17.5	50	6	1	7	7	2	9	3.5	1	1	2	3	3	0	0.6	2	2	3	avoided	0	0	0	0	0
2013_16	2013_16_01	2013_16_01_1_2	FWE	F	WE	7.5	7.5	42	7.5	1	1	3	80	0	1	1	0	1	0	0	0	1	0	16.42857143	11.42857143	27.85714286	8	4	12	13	4	17	6.25	4	1	5	3	1	2	0.857142857	1	2	9	avoided	1	0	0	0	0
2013_16	2013_16_01	2013_16_01_2_1	FWE	F	WE	7.5	7.5	42	7.5	1	1	3	80	0	1	1	0	1	0	0	0	1	0	16.42857143	11.42857143	27.85714286	8	4	12	13	4	17	6.25	4	1	5	3	1	2	0.857142857	1	2	9	grazed	1	0	0	0	0
2013_16	2013_16_01	2013_16_01_2_2	FWE	F	WE	7.5	7.5	42	7.5	1	1	3	80	0	1	1	0	1	0	0	0	1	0	16.42857143	11.42857143	27.85714286	8	4	12	13	4	17	6.25	4	1	5	3	1	2	0.857142857	1	2	9	avoided	1	0	0	0	0
2013_16	2013_16_01	2013_16_01_3_1	FWE	F	WE	7.5	7.5	42	7.5	1	1	3	80	0	1	1	0	1	0	0	0	1	0	16.42857143	11.42857143	27.85714286	8	4	12	13	4	17	6.25	4	1	5	3	1	2	0.857142857	1	2	9	grazed	0	0	0	0	0
2013_16	2013_16_01	2013_16_01_3_2	FWE	F	WE	7.5	7.5	42	7.5	1	1	3	80	0	1	1	0	1	0	0	0	1	0	16.42857143	11.42857143	27.85714286	8	4	12	13	4	17	6.25	4	1	5	3	1	2	0.857142857	1	2	9	avoided	0	0	0	0	0
2013_16	2013_16_01	2013_16_01_4_1	FWE	F	WE	7.5	7.5	42	7.5	1	1	3	80	0	1	1	0	1	0	0	0	1	0	16.42857143	11.42857143	27.85714286	8	4	12	13	4	17	6.25	4	1	5	3	1	2	0.857142857	1	2	9	grazed	1	0	0	0	0
2013_16	2013_16_01	2013_16_01_4_2	FWE	F	WE	7.5	7.5	42	7.5	1	1	3	80	0	1	1	0	1	0	0	0	1	0	16.42857143	11.42857143	27.85714286	8	4	12	13	4	17	6.25	4	1	5	3	1	2	0.857142857	1	2	9	avoided	1	0	0	0	0
2013_16	2013_16_02	2013_16_02_1_1	FWE	F	WE	7.5	7.5	42	7.5	1	1	3	80	0	1	1	0	1	0	0	0	1	0	21.25	21.25	42.5	8	3	11	13	4	17	6.25	4	1	5	3	2	1	0.705882353	4	1	6	grazed	0	0	0	0	0
2013_16	2013_16_02	2013_16_02_1_2	FWE	F	WE	7.5	7.5	42	7.5	1	1	3	80	0	1	1	0	1	0	0	0	1	0	21.25	21.25	42.5	8	3	11	13	4	17	6.25	4	1	5	3	2	1	0.705882353	4	1	6	avoided	0	0	0	0	0
2013_16	2013_16_02	2013_16_02_2_1	FWE	F	WE	7.5	7.5	42	7.5	1	1	3	80	0	1	1	0	1	0	0	0	1	0	21.25	21.25	42.5	8	3	11	13	4	17	6.25	4	1	5	3	2	1	0.705882353	4	1	6	grazed	0	0	0	0	0
2013_16	2013_16_02	2013_16_02_2_2	FWE	F	WE	7.5	7.5	42	7.5	1	1	3	80	0	1	1	0	1	0	0	0	1	0	21.25	21.25	42.5	8	3	11	13	4	17	6.25	4	1	5	3	2	1	0.705882353	4	1	6	avoided	0	0	0	0	0
2013_16	2013_16_02	2013_16_02_3_1	FWE	F	WE	7.5	7.5	42	7.5	1	1	3	80	0	1	1	0	1	0	0	0	1	0	21.25	21.25	42.5	8	3	11	13	4	17	6.25	4	1	5	3	2	1	0.705882353	4	1	6	grazed	1	0	0	0	0
2013_16	2013_16_02	2013_16_02_3_2	FWE	F	WE	7.5	7.5	42	7.5	1	1	3	80	0	1	1	0	1	0	0	0	1	0	21.25	21.25	42.5	8	3	11	13	4	17	6.25	4	1	5	3	2	1	0.705882353	4	1	6	avoided	0	0	0	0	0
2013_16	2013_16_02	2013_16_02_4_1	FWE	F	WE	7.5	7.5	42	7.5	1	1	3	80	0	1	1	0	1	0	0	0	1	0	21.25	21.25	42.5	8	3	11	13	4	17	6.25	4	1	5	3	2	1	0.705882353	4	1	6	grazed	0	0	0	0	0
2013_16	2013_16_02	2013_16_02_4_2	FWE	F	WE	7.5	7.5	42	7.5	1	1	3	80	0	1	1	0	1	0	0	0	1	0	21.25	21.25	42.5	8	3	11	13	4	17	6.25	4	1	5	3	2	1	0.705882353	4	1	6	avoided	0	0	0	0	0
2013_16	2013_16_03	2013_16_03_1_1	FWE	F	WE	7.5	7.5	42	7.5	1	1	3	80	0	1	1	0	1	0	0	0	1	1	10.625	10.625	21.25	9	2	11	13	4	17	6.25	3	2	5	3	2	1	0.428571429	4	4	3	grazed	0	0	0	0	0
2013_16	2013_16_03	2013_16_03_1_2	FWE	F	WE	7.5	7.5	42	7.5	1	1	3	80	0	1	1	0	1	0	0	0	1	1	10.625	10.625	21.25	9	2	11	13	4	17	6.25	3	2	5	3	2	1	0.428571429	4	4	3	avoided	0	0	0	0	0
2013_16	2013_16_03	2013_16_03_2_1	FWE	F	WE	7.5	7.5	42	7.5	1	1	3	80	0	1	1	0	1	0	0	0	1	1	10.625	10.625	21.25	9	2	11	13	4	17	6.25	3	2	5	3	2	1	0.428571429	4	4	3	grazed	0	0	0	0	0
2013_16	2013_16_03	2013_16_03_2_2	FWE	F	WE	7.5	7.5	42	7.5	1	1	3	80	0	1	1	0	1	0	0	0	1	1	10.625	10.625	21.25	9	2	11	13	4	17	6.25	3	2	5	3	2	1	0.428571429	4	4	3	avoided	0	0	0	0	0
2013_16	2013_16_03	2013_16_03_3_1	FWE	F	WE	7.5	7.5	42	7.5	1	1	3	80	0	1	1	0	1	0	0	0	1	1	10.625	10.625	21.25	9	2	11	13	4	17	6.25	3	2	5	3	2	1	0.428571429	4	4	3	grazed	0	0	0	0	0
2013_16	2013_16_03	2013_16_03_3_2	FWE	F	WE	7.5	7.5	42	7.5	1	1	3	80	0	1	1	0	1	0	0	0	1	1	10.625	10.625	21.25	9	2	11	13	4	17	6.25	3	2	5	3	2	1	0.428571429	4	4	3	avoided	0	0	0	0	0
2013_16	2013_16_03	2013_16_03_4_1	FWE	F	WE	7.5	7.5	42	7.5	1	1	3	80	0	1	1	0	1	0	0	0	1	1	10.625	10.625	21.25	9	2	11	13	4	17	6.25	3	2	5	3	2	1	0.428571429	4	4	3	grazed	0	0	0	0	0
2013_16	2013_16_03	2013_16_03_4_2	FWE	F	WE	7.5	7.5	42	7.5	1	1	3	80	0	1	1	0	1	0	0	0	1	1	10.625	10.625	21.25	9	2	11	13	4	17	6.25	3	2	5	3	2	1	0.428571429	4	4	3	avoided	0	0	0	0	0
2013_16	2013_16_04	2013_16_04_1_1	FWE	F	WE	7.5	7.5	42	7.5	1	1	3	80	0	1	1	0	1	0	0	0	1	1	18.125	18.125	36.25	7	2	9	13	4	17	6.25	3	2	5	3	2	1	0.875	1	1	7	grazed	0	0	0	0	0
2013_16	2013_16_04	2013_16_04_1_2	FWE	F	WE	7.5	7.5	42	7.5	1	1	3	80	0	1	1	0	1	0	0	0	1	1	18.125	18.125	36.25	7	2	9	13	4	17	6.25	3	2	5	3	2	1	0.875	1	1	7	avoided	0	0	0	0	0
2013_16	2013_16_04	2013_16_04_2_1	FWE	F	WE	7.5	7.5	42	7.5	1	1	3	80	0	1	1	0	1	0	0	0	1	1	18.125	18.125	36.25	7	2	9	13	4	17	6.25	3	2	5	3	2	1	0.875	1	1	7	grazed	0	0	0	0	0
2013_16	2013_16_04	2013_16_04_2_2	FWE	F	WE	7.5	7.5	42	7.5	1	1	3	80	0	1	1	0	1	0	0	0	1	1	18.125	18.125	36.25	7	2	9	13	4	17	6.25	3	2	5	3	2	1	0.875	1	1	7	avoided	0	0	0	0	0
2013_16	2013_16_04	2013_16_04_3_1	FWE	F	WE	7.5	7.5	42	7.5	1	1	3	80	0	1	1	0	1	0	0	0	1	1	18.125	18.125	36.25	7	2	9	13	4	17	6.25	3	2	5	3	2	1	0.875	1	1	7	grazed	0	0	0	0	0
2013_16	2013_16_04	2013_16_04_3_2	FWE	F	WE	7.5	7.5	42	7.5	1	1	3	80	0	1	1	0	1	0	0	0	1	1	18.125	18.125	36.25	7	2	9	13	4	17	6.25	3	2	5	3	2	1	0.875	1	1	7	avoided	0	0	0	0	0
2013_16	2013_16_04	2013_16_04_4_1	FWE	F	WE	7.5	7.5	42	7.5	1	1	3	80	0	1	1	0	1	0	0	0	1	1	18.125	18.125	36.25	7	2	9	13	4	17	6.25	3	2	5	3	2	1	0.875	1	1	7	grazed	0	0	0	0	0
2013_16	2013_16_04	2013_16_04_4_2	FWE	F	WE	7.5	7.5	42	7.5	1	1	3	80	0	1	1	0	1	0	0	0	1	1	18.125	18.125	36.25	7	2	9	13	4	17	6.25	3	2	5	3	2	1	0.875	1	1	7	avoided	0	0	0	0	0
2013_17	2013_17_01	2013_17_01_1_1	FE	F	E	210	180	60	180	0.857142857	0.857142857	4	0	1	0	1	1	0	1	0	0	1	0	43.875	0	43.875	13	0	13	18	1	19	8.25	0	0	0	7	6	1	0.631578947	3	4	6	grazed	0	0	0	0	0
2013_17	2013_17_01	2013_17_01_1_2	FE	F	E	210	180	60	180	0.857142857	0.857142857	4	0	1	0	1	1	0	1	0	0	1	0	43.875	0	43.875	13	0	13	18	1	19	8.25	0	0	0	7	6	1	0.631578947	3	4	6	avoided	0	0	0	0	0
2013_17	2013_17_01	2013_17_01_2_1	FE	F	E	210	180	60	180	0.857142857	0.857142857	4	0	1	0	1	1	0	1	0	0	1	0	43.875	0	43.875	13	0	13	18	1	19	8.25	0	0	0	7	6	1	0.631578947	3	4	6	grazed	0	0	0	0	0
2013_17	2013_17_01	2013_17_01_2_2	FE	F	E	210	180	60	180	0.857142857	0.857142857	4	0	1	0	1	1	0	1	0	0	1	0	43.875	0	43.875	13	0	13	18	1	19	8.25	0	0	0	7	6	1	0.631578947	3	4	6	avoided	0	0	0	0	0
2013_17	2013_17_01	2013_17_01_3_1	FE	F	E	210	180	60	180	0.857142857	0.857142857	4	0	1	0	1	1	0	1	0	0	1	0	43.875	0	43.875	13	0	13	18	1	19	8.25	0	0	0	7	6	1	0.631578947	3	4	6	grazed	0	0	0	0	0
2013_17	2013_17_01	2013_17_01_3_2	FE	F	E	210	180	60	180	0.857142857	0.857142857	4	0	1	0	1	1	0	1	0	0	1	0	43.875	0	43.875	13	0	13	18	1	19	8.25	0	0	0	7	6	1	0.631578947	3	4	6	avoided	0	0	0	0	0
2013_17	2013_17_01	2013_17_01_4_1	FE	F	E	210	180	60	180	0.857142857	0.857142857	4	0	1	0	1	1	0	1	0	0	1	0	43.875	0	43.875	13	0	13	18	1	19	8.25	0	0	0	7	6	1	0.631578947	3	4	6	grazed	0	0	0	0	0
2013_17	2013_17_01	2013_17_01_4_2	FE	F	E	210	180	60	180	0.857142857	0.857142857	4	0	1	0	1	1	0	1	0	0	1	0	43.875	0	43.875	13	0	13	18	1	19	8.25	0	0	0	7	6	1	0.631578947	3	4	6	avoided	0	0	0	0	0
2013_17	2013_17_02	2013_17_02_1_1	FE	F	E	210	180	60	180	0.857142857	0.857142857	4	0	1	0	1	1	0	1	0	0	1	0	51.25	0	51.25	8	1	9	18	1	19	8.25	0	0	0	7	5	2	0.714285714	2	2	5	grazed	0	0	0	0	0
2013_17	2013_17_02	2013_17_02_1_2	FE	F	E	210	180	60	180	0.857142857	0.857142857	4	0	1	0	1	1	0	1	0	0	1	0	51.25	0	51.25	8	1	9	18	1	19	8.25	0	0	0	7	5	2	0.714285714	2	2	5	avoided	0	0	0	0	0
2013_17	2013_17_02	2013_17_02_2_1	FE	F	E	210	180	60	180	0.857142857	0.857142857	4	0	1	0	1	1	0	1	0	0	1	0	51.25	0	51.25	8	1	9	18	1	19	8.25	0	0	0	7	5	2	0.714285714	2	2	5	grazed	0	0	0	0	0
2013_17	2013_17_02	2013_17_02_2_2	FE	F	E	210	180	60	180	0.857142857	0.857142857	4	0	1	0	1	1	0	1	0	0	1	0	51.25	0	51.25	8	1	9	18	1	19	8.25	0	0	0	7	5	2	0.714285714	2	2	5	avoided	0	0	0	0	0
2013_17	2013_17_02	2013_17_02_3_1	FE	F	E	210	180	60	180	0.857142857	0.857142857	4	0	1	0	1	1	0	1	0	0	1	0	51.25	0	51.25	8	1	9	18	1	19	8.25	0	0	0	7	5	2	0.714285714	2	2	5	grazed	0	0	0	0	0
2013_17	2013_17_02	2013_17_02_3_2	FE	F	E	210	180	60	180	0.857142857	0.857142857	4	0	1	0	1	1	0	1	0	0	1	0	51.25	0	51.25	8	1	9	18	1	19	8.25	0	0	0	7	5	2	0.714285714	2	2	5	avoided	0	0	0	0	0
2013_17	2013_17_02	2013_17_02_4_1	FE	F	E	210	180	60	180	0.857142857	0.857142857	4	0	1	0	1	1	0	1	0	0	1	0	51.25	0	51.25	8	1	9	18	1	19	8.25	0	0	0	7	5	2	0.714285714	2	2	5	grazed	0	0	0	0	0
2013_17	2013_17_02	2013_17_02_4_2	FE	F	E	210	180	60	180	0.857142857	0.857142857	4	0	1	0	1	1	0	1	0	0	1	0	51.25	0	51.25	8	1	9	18	1	19	8.25	0	0	0	7	5	2	0.714285714	2	2	5	avoided	0	0	0	0	0
2013_17	2013_17_03	2013_17_03_1_1	FE	F	E	210	180	60	180	0.857142857	0.857142857	4	0	1	0	1	1	0	1	0	0	1	1	35	0	35	9	0	9	18	1	19	8.25	0	0	0	7	4	3	0.714285714	1	3	5	grazed	0	0	0	0	0
2013_17	2013_17_03	2013_17_03_1_2	FE	F	E	210	180	60	180	0.857142857	0.857142857	4	0	1	0	1	1	0	1	0	0	1	1	35	0	35	9	0	9	18	1	19	8.25	0	0	0	7	4	3	0.714285714	1	3	5	avoided	0	0	0	0	0
2013_17	2013_17_03	2013_17_03_2_1	FE	F	E	210	180	60	180	0.857142857	0.857142857	4	0	1	0	1	1	0	1	0	0	1	1	35	0	35	9	0	9	18	1	19	8.25	0	0	0	7	4	3	0.714285714	1	3	5	grazed	0	0	0	0	0
2013_17	2013_17_03	2013_17_03_2_2	FE	F	E	210	180	60	180	0.857142857	0.857142857	4	0	1	0	1	1	0	1	0	0	1	1	35	0	35	9	0	9	18	1	19	8.25	0	0	0	7	4	3	0.714285714	1	3	5	avoided	0	0	0	0	0
2013_17	2013_17_03	2013_17_03_3_1	FE	F	E	210	180	60	180	0.857142857	0.857142857	4	0	1	0	1	1	0	1	0	0	1	1	35	0	35	9	0	9	18	1	19	8.25	0	0	0	7	4	3	0.714285714	1	3	5	grazed	0	0	0	0	0
2013_17	2013_17_03	2013_17_03_3_2	FE	F	E	210	180	60	180	0.857142857	0.857142857	4	0	1	0	1	1	0	1	0	0	1	1	35	0	35	9	0	9	18	1	19	8.25	0	0	0	7	4	3	0.714285714	1	3	5	avoided	0	0	0	0	0
2013_17	2013_17_03	2013_17_03_4_1	FE	F	E	210	180	60	180	0.857142857	0.857142857	4	0	1	0	1	1	0	1	0	0	1	1	35	0	35	9	0	9	18	1	19	8.25	0	0	0	7	4	3	0.714285714	1	3	5	grazed	0	0	0	0	0
2013_17	2013_17_03	2013_17_03_4_2	FE	F	E	210	180	60	180	0.857142857	0.857142857	4	0	1	0	1	1	0	1	0	0	1	1	35	0	35	9	0	9	18	1	19	8.25	0	0	0	7	4	3	0.714285714	1	3	5	avoided	0	0	0	0	0
2013_17	2013_17_04	2013_17_04_1_1	FE	F	E	210	180	60	180	0.857142857	0.857142857	4	0	1	0	1	1	0	1	0	0	1	1	39.5	0	39.5	12	0	12	18	1	19	8.25	0	0	0	7	6	1	0.4	1	8	3	grazed	0	0	0	0	0
2013_17	2013_17_04	2013_17_04_1_2	FE	F	E	210	180	60	180	0.857142857	0.857142857	4	0	1	0	1	1	0	1	0	0	1	1	39.5	0	39.5	12	0	12	18	1	19	8.25	0	0	0	7	6	1	0.4	1	8	3	avoided	0	0	0	0	0
2013_17	2013_17_04	2013_17_04_2_1	FE	F	E	210	180	60	180	0.857142857	0.857142857	4	0	1	0	1	1	0	1	0	0	1	1	39.5	0	39.5	12	0	12	18	1	19	8.25	0	0	0	7	6	1	0.4	1	8	3	grazed	0	0	0	0	0
2013_17	2013_17_04	2013_17_04_2_2	FE	F	E	210	180	60	180	0.857142857	0.857142857	4	0	1	0	1	1	0	1	0	0	1	1	39.5	0	39.5	12	0	12	18	1	19	8.25	0	0	0	7	6	1	0.4	1	8	3	avoided	0	0	0	0	0
2013_17	2013_17_04	2013_17_04_3_1	FE	F	E	210	180	60	180	0.857142857	0.857142857	4	0	1	0	1	1	0	1	0	0	1	1	39.5	0	39.5	12	0	12	18	1	19	8.25	0	0	0	7	6	1	0.4	1	8	3	grazed	0	0	0	0	0
2013_17	2013_17_04	2013_17_04_3_2	FE	F	E	210	180	60	180	0.857142857	0.857142857	4	0	1	0	1	1	0	1	0	0	1	1	39.5	0	39.5	12	0	12	18	1	19	8.25	0	0	0	7	6	1	0.4	1	8	3	avoided	0	0	0	0	0
2013_17	2013_17_04	2013_17_04_4_1	FE	F	E	210	180	60	180	0.857142857	0.857142857	4	0	1	0	1	1	0	1	0	0	1	1	39.5	0	39.5	12	0	12	18	1	19	8.25	0	0	0	7	6	1	0.4	1	8	3	grazed	0	0	0	0	0
2013_17	2013_17_04	2013_17_04_4_2	FE	F	E	210	180	60	180	0.857142857	0.857142857	4	0	1	0	1	1	0	1	0	0	1	1	39.5	0	39.5	12	0	12	18	1	19	8.25	0	0	0	7	6	1	0.4	1	8	3	avoided	0	0	0	0	0
2014_02	2014_02_01	2014_02_01_1_1	PE	P	E	6.48	6.48	17.8	6.48	1	1	1	50	1	1	1	1	1	0	0	0	1	0	4.75	0.375	5.125	9	1	10	11	1	12	4.5	1	1	2	6	6	0	0.461538462	2	5	3	grazed	0	0	0	0	0
2014_02	2014_02_01	2014_02_01_1_2	PE	P	E	6.48	6.48	17.8	6.48	1	1	1	50	1	1	1	1	1	0	0	0	1	0	4.75	0.375	5.125	9	1	10	11	1	12	4.5	1	1	2	6	6	0	0.461538462	2	5	3	avoided	0	0	0	0	0
2014_02	2014_02_01	2014_02_01_2_1	PE	P	E	6.48	6.48	17.8	6.48	1	1	1	50	1	1	1	1	1	0	0	0	1	0	4.75	0.375	5.125	9	1	10	11	1	12	4.5	1	1	2	6	6	0	0.461538462	2	5	3	grazed	0	0	0	0	0
2014_02	2014_02_01	2014_02_01_2_2	PE	P	E	6.48	6.48	17.8	6.48	1	1	1	50	1	1	1	1	1	0	0	0	1	0	4.75	0.375	5.125	9	1	10	11	1	12	4.5	1	1	2	6	6	0	0.461538462	2	5	3	avoided	0	0	0	0	0
2014_02	2014_02_01	2014_02_01_3_1	PE	P	E	6.48	6.48	17.8	6.48	1	1	1	50	1	1	1	1	1	0	0	0	1	0	4.75	0.375	5.125	9	1	10	11	1	12	4.5	1	1	2	6	6	0	0.461538462	2	5	3	grazed	0	0	0	0	0
2014_02	2014_02_01	2014_02_01_3_2	PE	P	E	6.48	6.48	17.8	6.48	1	1	1	50	1	1	1	1	1	0	0	0	1	0	4.75	0.375	5.125	9	1	10	11	1	12	4.5	1	1	2	6	6	0	0.461538462	2	5	3	avoided	0	0	0	0	0
2014_02	2014_02_01	2014_02_01_4_1	PE	P	E	6.48	6.48	17.8	6.48	1	1	1	50	1	1	1	1	1	0	0	0	1	0	4.75	0.375	5.125	9	1	10	11	1	12	4.5	1	1	2	6	6	0	0.461538462	2	5	3	grazed	0	0	0	0	0
2014_02	2014_02_01	2014_02_01_4_2	PE	P	E	6.48	6.48	17.8	6.48	1	1	1	50	1	1	1	1	1	0	0	0	1	0	4.75	0.375	5.125	9	1	10	11	1	12	4.5	1	1	2	6	6	0	0.461538462	2	5	3	avoided	0	0	0	0	0
NA	2014_02_02	2014_02_02_1_1	NA	NA	NA	NA	NA	NA	NA	NA	NA	NA	NA	NA	NA	NA	NA	NA	NA	NA	NA	NA	NA	NA	NA	NA	NA	NA	NA	NA	NA	NA	NA	NA	NA	NA	NA	NA	NA	NA	NA	NA	NA	grazed	0	0	0	0	0
NA	2014_02_02	2014_02_02_1_2	NA	NA	NA	NA	NA	NA	NA	NA	NA	NA	NA	NA	NA	NA	NA	NA	NA	NA	NA	NA	NA	NA	NA	NA	NA	NA	NA	NA	NA	NA	NA	NA	NA	NA	NA	NA	NA	NA	NA	NA	NA	avoided	0	0	0	0	0
NA	2014_02_02	2014_02_02_2_1	NA	NA	NA	NA	NA	NA	NA	NA	NA	NA	NA	NA	NA	NA	NA	NA	NA	NA	NA	NA	NA	NA	NA	NA	NA	NA	NA	NA	NA	NA	NA	NA	NA	NA	NA	NA	NA	NA	NA	NA	NA	grazed	0	0	0	0	0
NA	2014_02_02	2014_02_02_2_2	NA	NA	NA	NA	NA	NA	NA	NA	NA	NA	NA	NA	NA	NA	NA	NA	NA	NA	NA	NA	NA	NA	NA	NA	NA	NA	NA	NA	NA	NA	NA	NA	NA	NA	NA	NA	NA	NA	NA	NA	NA	avoided	0	0	0	0	0
NA	2014_02_02	2014_02_02_3_1	NA	NA	NA	NA	NA	NA	NA	NA	NA	NA	NA	NA	NA	NA	NA	NA	NA	NA	NA	NA	NA	NA	NA	NA	NA	NA	NA	NA	NA	NA	NA	NA	NA	NA	NA	NA	NA	NA	NA	NA	NA	grazed	0	0	0	0	0
NA	2014_02_02	2014_02_02_3_2	NA	NA	NA	NA	NA	NA	NA	NA	NA	NA	NA	NA	NA	NA	NA	NA	NA	NA	NA	NA	NA	NA	NA	NA	NA	NA	NA	NA	NA	NA	NA	NA	NA	NA	NA	NA	NA	NA	NA	NA	NA	avoided	0	0	0	0	0
NA	2014_02_02	2014_02_02_4_1	NA	NA	NA	NA	NA	NA	NA	NA	NA	NA	NA	NA	NA	NA	NA	NA	NA	NA	NA	NA	NA	NA	NA	NA	NA	NA	NA	NA	NA	NA	NA	NA	NA	NA	NA	NA	NA	NA	NA	NA	NA	grazed	0	0	0	0	0
NA	2014_02_02	2014_02_02_4_2	NA	NA	NA	NA	NA	NA	NA	NA	NA	NA	NA	NA	NA	NA	NA	NA	NA	NA	NA	NA	NA	NA	NA	NA	NA	NA	NA	NA	NA	NA	NA	NA	NA	NA	NA	NA	NA	NA	NA	NA	NA	avoided	0	0	0	0	0
2014_02	2014_02_03	2014_02_03_1_1	PE	P	E	6.48	6.48	17.8	6.48	1	1	1	50	1	1	1	1	1	0	1	0	1	1	12.5	0.125	12.625	6	1	7	11	1	12	4.5	1	1	2	6	5	1	0.25	3	3	1	grazed	0	0	0	0	0
2014_02	2014_02_03	2014_02_03_1_2	PE	P	E	6.48	6.48	17.8	6.48	1	1	1	50	1	1	1	1	1	0	1	0	1	1	12.5	0.125	12.625	6	1	7	11	1	12	4.5	1	1	2	6	5	1	0.25	3	3	1	avoided	0	0	0	0	0
2014_02	2014_02_03	2014_02_03_2_1	PE	P	E	6.48	6.48	17.8	6.48	1	1	1	50	1	1	1	1	1	0	1	0	1	1	12.5	0.125	12.625	6	1	7	11	1	12	4.5	1	1	2	6	5	1	0.25	3	3	1	grazed	0	0	0	0	0
2014_02	2014_02_03	2014_02_03_2_2	PE	P	E	6.48	6.48	17.8	6.48	1	1	1	50	1	1	1	1	1	0	1	0	1	1	12.5	0.125	12.625	6	1	7	11	1	12	4.5	1	1	2	6	5	1	0.25	3	3	1	avoided	0	0	0	0	0
2014_02	2014_02_03	2014_02_03_3_1	PE	P	E	6.48	6.48	17.8	6.48	1	1	1	50	1	1	1	1	1	0	1	0	1	1	12.5	0.125	12.625	6	1	7	11	1	12	4.5	1	1	2	6	5	1	0.25	3	3	1	grazed	0	0	0	0	0
2014_02	2014_02_03	2014_02_03_3_2	PE	P	E	6.48	6.48	17.8	6.48	1	1	1	50	1	1	1	1	1	0	1	0	1	1	12.5	0.125	12.625	6	1	7	11	1	12	4.5	1	1	2	6	5	1	0.25	3	3	1	avoided	0	0	0	0	0
2014_02	2014_02_03	2014_02_03_4_1	PE	P	E	6.48	6.48	17.8	6.48	1	1	1	50	1	1	1	1	1	0	1	0	1	1	12.5	0.125	12.625	6	1	7	11	1	12	4.5	1	1	2	6	5	1	0.25	3	3	1	grazed	0	0	0	0	0
2014_02	2014_02_03	2014_02_03_4_2	PE	P	E	6.48	6.48	17.8	6.48	1	1	1	50	1	1	1	1	1	0	1	0	1	1	12.5	0.125	12.625	6	1	7	11	1	12	4.5	1	1	2	6	5	1	0.25	3	3	1	avoided	0	0	0	0	0
NA	2014_02_04	2014_02_04_1_1	NA	NA	NA	NA	NA	NA	NA	NA	NA	NA	NA	NA	NA	NA	NA	NA	NA	NA	NA	NA	NA	NA	NA	NA	NA	NA	NA	NA	NA	NA	NA	NA	NA	NA	NA	NA	NA	NA	NA	NA	NA	grazed	0	0	0	0	0
NA	2014_02_04	2014_02_04_1_2	NA	NA	NA	NA	NA	NA	NA	NA	NA	NA	NA	NA	NA	NA	NA	NA	NA	NA	NA	NA	NA	NA	NA	NA	NA	NA	NA	NA	NA	NA	NA	NA	NA	NA	NA	NA	NA	NA	NA	NA	NA	avoided	0	0	0	0	0
NA	2014_02_04	2014_02_04_2_1	NA	NA	NA	NA	NA	NA	NA	NA	NA	NA	NA	NA	NA	NA	NA	NA	NA	NA	NA	NA	NA	NA	NA	NA	NA	NA	NA	NA	NA	NA	NA	NA	NA	NA	NA	NA	NA	NA	NA	NA	NA	grazed	0	0	0	0	0
NA	2014_02_04	2014_02_04_2_2	NA	NA	NA	NA	NA	NA	NA	NA	NA	NA	NA	NA	NA	NA	NA	NA	NA	NA	NA	NA	NA	NA	NA	NA	NA	NA	NA	NA	NA	NA	NA	NA	NA	NA	NA	NA	NA	NA	NA	NA	NA	avoided	0	0	0	0	0
NA	2014_02_04	2014_02_04_3_1	NA	NA	NA	NA	NA	NA	NA	NA	NA	NA	NA	NA	NA	NA	NA	NA	NA	NA	NA	NA	NA	NA	NA	NA	NA	NA	NA	NA	NA	NA	NA	NA	NA	NA	NA	NA	NA	NA	NA	NA	NA	grazed	0	0	0	0	0
NA	2014_02_04	2014_02_04_3_2	NA	NA	NA	NA	NA	NA	NA	NA	NA	NA	NA	NA	NA	NA	NA	NA	NA	NA	NA	NA	NA	NA	NA	NA	NA	NA	NA	NA	NA	NA	NA	NA	NA	NA	NA	NA	NA	NA	NA	NA	NA	avoided	0	0	0	0	0
NA	2014_02_04	2014_02_04_4_1	NA	NA	NA	NA	NA	NA	NA	NA	NA	NA	NA	NA	NA	NA	NA	NA	NA	NA	NA	NA	NA	NA	NA	NA	NA	NA	NA	NA	NA	NA	NA	NA	NA	NA	NA	NA	NA	NA	NA	NA	NA	grazed	0	0	0	0	0
NA	2014_02_04	2014_02_04_4_2	NA	NA	NA	NA	NA	NA	NA	NA	NA	NA	NA	NA	NA	NA	NA	NA	NA	NA	NA	NA	NA	NA	NA	NA	NA	NA	NA	NA	NA	NA	NA	NA	NA	NA	NA	NA	NA	NA	NA	NA	NA	avoided	0	0	0	0	0
NA	2014_04_01	2014_04_01_1_1	NA	NA	NA	NA	NA	NA	NA	NA	NA	NA	NA	NA	NA	NA	NA	NA	NA	NA	NA	NA	NA	NA	NA	NA	NA	NA	NA	NA	NA	NA	NA	NA	NA	NA	NA	NA	NA	NA	NA	NA	NA	grazed	0	0	0	0	0
NA	2014_04_01	2014_04_01_1_2	NA	NA	NA	NA	NA	NA	NA	NA	NA	NA	NA	NA	NA	NA	NA	NA	NA	NA	NA	NA	NA	NA	NA	NA	NA	NA	NA	NA	NA	NA	NA	NA	NA	NA	NA	NA	NA	NA	NA	NA	NA	avoided	0	0	0	0	0
NA	2014_04_01	2014_04_01_2_1	NA	NA	NA	NA	NA	NA	NA	NA	NA	NA	NA	NA	NA	NA	NA	NA	NA	NA	NA	NA	NA	NA	NA	NA	NA	NA	NA	NA	NA	NA	NA	NA	NA	NA	NA	NA	NA	NA	NA	NA	NA	grazed	0	0	0	0	0
NA	2014_04_01	2014_04_01_2_2	NA	NA	NA	NA	NA	NA	NA	NA	NA	NA	NA	NA	NA	NA	NA	NA	NA	NA	NA	NA	NA	NA	NA	NA	NA	NA	NA	NA	NA	NA	NA	NA	NA	NA	NA	NA	NA	NA	NA	NA	NA	avoided	0	0	0	0	0
NA	2014_04_01	2014_04_01_3_1	NA	NA	NA	NA	NA	NA	NA	NA	NA	NA	NA	NA	NA	NA	NA	NA	NA	NA	NA	NA	NA	NA	NA	NA	NA	NA	NA	NA	NA	NA	NA	NA	NA	NA	NA	NA	NA	NA	NA	NA	NA	grazed	0	0	0	0	0
NA	2014_04_01	2014_04_01_3_2	NA	NA	NA	NA	NA	NA	NA	NA	NA	NA	NA	NA	NA	NA	NA	NA	NA	NA	NA	NA	NA	NA	NA	NA	NA	NA	NA	NA	NA	NA	NA	NA	NA	NA	NA	NA	NA	NA	NA	NA	NA	avoided	0	0	0	0	0
NA	2014_04_01	2014_04_01_4_1	NA	NA	NA	NA	NA	NA	NA	NA	NA	NA	NA	NA	NA	NA	NA	NA	NA	NA	NA	NA	NA	NA	NA	NA	NA	NA	NA	NA	NA	NA	NA	NA	NA	NA	NA	NA	NA	NA	NA	NA	NA	grazed	0	0	0	0	0
NA	2014_04_01	2014_04_01_4_2	NA	NA	NA	NA	NA	NA	NA	NA	NA	NA	NA	NA	NA	NA	NA	NA	NA	NA	NA	NA	NA	NA	NA	NA	NA	NA	NA	NA	NA	NA	NA	NA	NA	NA	NA	NA	NA	NA	NA	NA	NA	avoided	0	0	0	0	0
2014_04	2014_04_02	2014_04_02_1_1	FE	F	E	17	17	54	17	1	1	2.5	30	1	1	1	1	1	0	0	0	1	1	6.28325	1.25	7.53325	6	1	7	6	1	7	1.75	1	0	1	3	3	0	0.6	2	2	3	grazed	0	0	0	0	0
2014_04	2014_04_02	2014_04_02_1_2	FE	F	E	17	17	54	17	1	1	2.5	30	1	1	1	1	1	0	0	0	1	1	6.28325	1.25	7.53325	6	1	7	6	1	7	1.75	1	0	1	3	3	0	0.6	2	2	3	avoided	0	0	0	0	0
2014_04	2014_04_02	2014_04_02_2_1	FE	F	E	17	17	54	17	1	1	2.5	30	1	1	1	1	1	0	0	0	1	1	6.28325	1.25	7.53325	6	1	7	6	1	7	1.75	1	0	1	3	3	0	0.6	2	2	3	grazed	0	0	0	0	0
2014_04	2014_04_02	2014_04_02_2_2	FE	F	E	17	17	54	17	1	1	2.5	30	1	1	1	1	1	0	0	0	1	1	6.28325	1.25	7.53325	6	1	7	6	1	7	1.75	1	0	1	3	3	0	0.6	2	2	3	avoided	0	0	0	0	0
2014_04	2014_04_02	2014_04_02_3_1	FE	F	E	17	17	54	17	1	1	2.5	30	1	1	1	1	1	0	0	0	1	1	6.28325	1.25	7.53325	6	1	7	6	1	7	1.75	1	0	1	3	3	0	0.6	2	2	3	grazed	0	0	0	0	0
2014_04	2014_04_02	2014_04_02_3_2	FE	F	E	17	17	54	17	1	1	2.5	30	1	1	1	1	1	0	0	0	1	1	6.28325	1.25	7.53325	6	1	7	6	1	7	1.75	1	0	1	3	3	0	0.6	2	2	3	avoided	0	0	0	0	0
2014_04	2014_04_02	2014_04_02_4_1	FE	F	E	17	17	54	17	1	1	2.5	30	1	1	1	1	1	0	0	0	1	1	6.28325	1.25	7.53325	6	1	7	6	1	7	1.75	1	0	1	3	3	0	0.6	2	2	3	grazed	0	0	0	0	0
2014_04	2014_04_02	2014_04_02_4_2	FE	F	E	17	17	54	17	1	1	2.5	30	1	1	1	1	1	0	0	0	1	1	6.28325	1.25	7.53325	6	1	7	6	1	7	1.75	1	0	1	3	3	0	0.6	2	2	3	avoided	0	0	0	0	0
2014_04	2014_04_03	2014_04_03_1_1	FE	F	E	17	17	54	17	1	1	2.5	30	1	1	1	1	1	0	0	0	1	0	1.635	0.54125	2.17625	5	1	6	6	1	7	1.75	0	1	1	3	3	0	0.5	2	2	2	grazed	0	0	0	0	0
2014_04	2014_04_03	2014_04_03_1_2	FE	F	E	17	17	54	17	1	1	2.5	30	1	1	1	1	1	0	0	0	1	0	1.635	0.54125	2.17625	5	1	6	6	1	7	1.75	0	1	1	3	3	0	0.5	2	2	2	avoided	0	0	0	0	0
2014_04	2014_04_03	2014_04_03_2_1	FE	F	E	17	17	54	17	1	1	2.5	30	1	1	1	1	1	0	0	0	1	0	1.635	0.54125	2.17625	5	1	6	6	1	7	1.75	0	1	1	3	3	0	0.5	2	2	2	grazed	0	0	0	0	0
2014_04	2014_04_03	2014_04_03_2_2	FE	F	E	17	17	54	17	1	1	2.5	30	1	1	1	1	1	0	0	0	1	0	1.635	0.54125	2.17625	5	1	6	6	1	7	1.75	0	1	1	3	3	0	0.5	2	2	2	avoided	0	0	0	0	0
2014_04	2014_04_03	2014_04_03_3_1	FE	F	E	17	17	54	17	1	1	2.5	30	1	1	1	1	1	0	0	0	1	0	1.635	0.54125	2.17625	5	1	6	6	1	7	1.75	0	1	1	3	3	0	0.5	2	2	2	grazed	0	0	0	0	0
2014_04	2014_04_03	2014_04_03_3_2	FE	F	E	17	17	54	17	1	1	2.5	30	1	1	1	1	1	0	0	0	1	0	1.635	0.54125	2.17625	5	1	6	6	1	7	1.75	0	1	1	3	3	0	0.5	2	2	2	avoided	0	0	0	0	0
2014_04	2014_04_03	2014_04_03_4_1	FE	F	E	17	17	54	17	1	1	2.5	30	1	1	1	1	1	0	0	0	1	0	1.635	0.54125	2.17625	5	1	6	6	1	7	1.75	0	1	1	3	3	0	0.5	2	2	2	grazed	0	0	0	0	0
2014_04	2014_04_03	2014_04_03_4_2	FE	F	E	17	17	54	17	1	1	2.5	30	1	1	1	1	1	0	0	0	1	0	1.635	0.54125	2.17625	5	1	6	6	1	7	1.75	0	1	1	3	3	0	0.5	2	2	2	avoided	0	0	0	0	0
NA	2014_04_04	2014_04_04_1_1	NA	NA	NA	NA	NA	NA	NA	NA	NA	NA	NA	NA	NA	NA	NA	NA	NA	NA	NA	NA	NA	NA	NA	NA	NA	NA	NA	NA	NA	NA	NA	NA	NA	NA	NA	NA	NA	NA	NA	NA	NA	grazed	0	0	0	0	0
NA	2014_04_04	2014_04_04_1_2	NA	NA	NA	NA	NA	NA	NA	NA	NA	NA	NA	NA	NA	NA	NA	NA	NA	NA	NA	NA	NA	NA	NA	NA	NA	NA	NA	NA	NA	NA	NA	NA	NA	NA	NA	NA	NA	NA	NA	NA	NA	avoided	0	0	0	0	0
NA	2014_04_04	2014_04_04_2_1	NA	NA	NA	NA	NA	NA	NA	NA	NA	NA	NA	NA	NA	NA	NA	NA	NA	NA	NA	NA	NA	NA	NA	NA	NA	NA	NA	NA	NA	NA	NA	NA	NA	NA	NA	NA	NA	NA	NA	NA	NA	grazed	0	0	0	0	0
NA	2014_04_04	2014_04_04_2_2	NA	NA	NA	NA	NA	NA	NA	NA	NA	NA	NA	NA	NA	NA	NA	NA	NA	NA	NA	NA	NA	NA	NA	NA	NA	NA	NA	NA	NA	NA	NA	NA	NA	NA	NA	NA	NA	NA	NA	NA	NA	avoided	0	0	0	0	0
NA	2014_04_04	2014_04_04_3_1	NA	NA	NA	NA	NA	NA	NA	NA	NA	NA	NA	NA	NA	NA	NA	NA	NA	NA	NA	NA	NA	NA	NA	NA	NA	NA	NA	NA	NA	NA	NA	NA	NA	NA	NA	NA	NA	NA	NA	NA	NA	grazed	0	0	0	0	0
NA	2014_04_04	2014_04_04_3_2	NA	NA	NA	NA	NA	NA	NA	NA	NA	NA	NA	NA	NA	NA	NA	NA	NA	NA	NA	NA	NA	NA	NA	NA	NA	NA	NA	NA	NA	NA	NA	NA	NA	NA	NA	NA	NA	NA	NA	NA	NA	avoided	0	0	0	0	0
NA	2014_04_04	2014_04_04_4_1	NA	NA	NA	NA	NA	NA	NA	NA	NA	NA	NA	NA	NA	NA	NA	NA	NA	NA	NA	NA	NA	NA	NA	NA	NA	NA	NA	NA	NA	NA	NA	NA	NA	NA	NA	NA	NA	NA	NA	NA	NA	grazed	0	0	0	0	0
NA	2014_04_04	2014_04_04_4_2	NA	NA	NA	NA	NA	NA	NA	NA	NA	NA	NA	NA	NA	NA	NA	NA	NA	NA	NA	NA	NA	NA	NA	NA	NA	NA	NA	NA	NA	NA	NA	NA	NA	NA	NA	NA	NA	NA	NA	NA	NA	avoided	0	0	0	0	0
2014_07	2014_07_01	2014_07_01_1_1	PE	P	E	14.75	14.75	25	14.75	1	1	1.5	40	1	1	1	0	0	0	0	0	0	0	17	17.375	34.375	14	2	16	20	3	23	9.5	1	1	2	6	4	2	0.608695652	3	6	7	grazed	1	0	0	0	0
2014_07	2014_07_01	2014_07_01_1_2	PE	P	E	14.75	14.75	25	14.75	1	1	1.5	40	1	1	1	0	0	0	0	0	0	0	17	17.375	34.375	14	2	16	20	3	23	9.5	1	1	2	6	4	2	0.608695652	3	6	7	avoided	1	0	0	0	0
2014_07	2014_07_01	2014_07_01_2_1	PE	P	E	14.75	14.75	25	14.75	1	1	1.5	40	1	1	1	0	0	0	0	0	0	0	17	17.375	34.375	14	2	16	20	3	23	9.5	1	1	2	6	4	2	0.608695652	3	6	7	grazed	1	0	0	0	0
2014_07	2014_07_01	2014_07_01_2_2	PE	P	E	14.75	14.75	25	14.75	1	1	1.5	40	1	1	1	0	0	0	0	0	0	0	17	17.375	34.375	14	2	16	20	3	23	9.5	1	1	2	6	4	2	0.608695652	3	6	7	avoided	1	0	0	0	0
2014_07	2014_07_01	2014_07_01_3_1	PE	P	E	14.75	14.75	25	14.75	1	1	1.5	40	1	1	1	0	0	0	0	0	0	0	17	17.375	34.375	14	2	16	20	3	23	9.5	1	1	2	6	4	2	0.608695652	3	6	7	grazed	1	0	0	0	0
2014_07	2014_07_01	2014_07_01_3_2	PE	P	E	14.75	14.75	25	14.75	1	1	1.5	40	1	1	1	0	0	0	0	0	0	0	17	17.375	34.375	14	2	16	20	3	23	9.5	1	1	2	6	4	2	0.608695652	3	6	7	avoided	1	0	0	0	0
2014_07	2014_07_01	2014_07_01_4_1	PE	P	E	14.75	14.75	25	14.75	1	1	1.5	40	1	1	1	0	0	0	0	0	0	0	17	17.375	34.375	14	2	16	20	3	23	9.5	1	1	2	6	4	2	0.608695652	3	6	7	grazed	1	0	0	0	0
2014_07	2014_07_01	2014_07_01_4_2	PE	P	E	14.75	14.75	25	14.75	1	1	1.5	40	1	1	1	0	0	0	0	0	0	0	17	17.375	34.375	14	2	16	20	3	23	9.5	1	1	2	6	4	2	0.608695652	3	6	7	avoided	1	0	0	0	0
2014_07	2014_07_02	2014_07_02_1_1	PE	P	E	14.75	14.75	25	14.75	1	1	1.5	40	1	1	1	0	1	0	0	0	0	0	18.25	2.125	20.375	10	1	11	20	3	23	9.5	1	1	2	6	5	1	0.625	3	3	5	grazed	1	0	0	0	0
2014_07	2014_07_02	2014_07_02_1_2	PE	P	E	14.75	14.75	25	14.75	1	1	1.5	40	1	1	1	0	1	0	0	0	0	0	18.25	2.125	20.375	10	1	11	20	3	23	9.5	1	1	2	6	5	1	0.625	3	3	5	avoided	0	0	0	0	0
2014_07	2014_07_02	2014_07_02_2_1	PE	P	E	14.75	14.75	25	14.75	1	1	1.5	40	1	1	1	0	1	0	0	0	0	0	18.25	2.125	20.375	10	1	11	20	3	23	9.5	1	1	2	6	5	1	0.625	3	3	5	grazed	0	0	0	0	0
2014_07	2014_07_02	2014_07_02_2_2	PE	P	E	14.75	14.75	25	14.75	1	1	1.5	40	1	1	1	0	1	0	0	0	0	0	18.25	2.125	20.375	10	1	11	20	3	23	9.5	1	1	2	6	5	1	0.625	3	3	5	avoided	0	0	0	0	0
2014_07	2014_07_02	2014_07_02_3_1	PE	P	E	14.75	14.75	25	14.75	1	1	1.5	40	1	1	1	0	1	0	0	0	0	0	18.25	2.125	20.375	10	1	11	20	3	23	9.5	1	1	2	6	5	1	0.625	3	3	5	grazed	0	0	0	0	0
2014_07	2014_07_02	2014_07_02_3_2	PE	P	E	14.75	14.75	25	14.75	1	1	1.5	40	1	1	1	0	1	0	0	0	0	0	18.25	2.125	20.375	10	1	11	20	3	23	9.5	1	1	2	6	5	1	0.625	3	3	5	avoided	0	0	0	0	0
2014_07	2014_07_02	2014_07_02_4_1	PE	P	E	14.75	14.75	25	14.75	1	1	1.5	40	1	1	1	0	1	0	0	0	0	0	18.25	2.125	20.375	10	1	11	20	3	23	9.5	1	1	2	6	5	1	0.625	3	3	5	grazed	1	0	0	0	0
2014_07	2014_07_02	2014_07_02_4_2	PE	P	E	14.75	14.75	25	14.75	1	1	1.5	40	1	1	1	0	1	0	0	0	0	0	18.25	2.125	20.375	10	1	11	20	3	23	9.5	1	1	2	6	5	1	0.625	3	3	5	avoided	0	0	0	0	0
NA	2014_07_03	2014_07_03_1_1	NA	NA	NA	NA	NA	NA	NA	NA	NA	NA	NA	NA	NA	NA	NA	NA	NA	NA	NA	NA	NA	NA	NA	NA	NA	NA	NA	NA	NA	NA	NA	NA	NA	NA	NA	NA	NA	NA	NA	NA	NA	grazed	1	0	0	0	0
NA	2014_07_03	2014_07_03_1_2	NA	NA	NA	NA	NA	NA	NA	NA	NA	NA	NA	NA	NA	NA	NA	NA	NA	NA	NA	NA	NA	NA	NA	NA	NA	NA	NA	NA	NA	NA	NA	NA	NA	NA	NA	NA	NA	NA	NA	NA	NA	avoided	1	0	0	0	0
NA	2014_07_03	2014_07_03_2_1	NA	NA	NA	NA	NA	NA	NA	NA	NA	NA	NA	NA	NA	NA	NA	NA	NA	NA	NA	NA	NA	NA	NA	NA	NA	NA	NA	NA	NA	NA	NA	NA	NA	NA	NA	NA	NA	NA	NA	NA	NA	grazed	1	0	0	0	0
NA	2014_07_03	2014_07_03_2_2	NA	NA	NA	NA	NA	NA	NA	NA	NA	NA	NA	NA	NA	NA	NA	NA	NA	NA	NA	NA	NA	NA	NA	NA	NA	NA	NA	NA	NA	NA	NA	NA	NA	NA	NA	NA	NA	NA	NA	NA	NA	avoided	1	0	0	0	0
NA	2014_07_03	2014_07_03_3_1	NA	NA	NA	NA	NA	NA	NA	NA	NA	NA	NA	NA	NA	NA	NA	NA	NA	NA	NA	NA	NA	NA	NA	NA	NA	NA	NA	NA	NA	NA	NA	NA	NA	NA	NA	NA	NA	NA	NA	NA	NA	grazed	1	0	0	0	0
NA	2014_07_03	2014_07_03_3_2	NA	NA	NA	NA	NA	NA	NA	NA	NA	NA	NA	NA	NA	NA	NA	NA	NA	NA	NA	NA	NA	NA	NA	NA	NA	NA	NA	NA	NA	NA	NA	NA	NA	NA	NA	NA	NA	NA	NA	NA	NA	avoided	1	0	0	0	0
NA	2014_07_03	2014_07_03_4_1	NA	NA	NA	NA	NA	NA	NA	NA	NA	NA	NA	NA	NA	NA	NA	NA	NA	NA	NA	NA	NA	NA	NA	NA	NA	NA	NA	NA	NA	NA	NA	NA	NA	NA	NA	NA	NA	NA	NA	NA	NA	grazed	1	0	0	0	0
NA	2014_07_03	2014_07_03_4_2	NA	NA	NA	NA	NA	NA	NA	NA	NA	NA	NA	NA	NA	NA	NA	NA	NA	NA	NA	NA	NA	NA	NA	NA	NA	NA	NA	NA	NA	NA	NA	NA	NA	NA	NA	NA	NA	NA	NA	NA	NA	avoided	1	0	0	0	0
2014_07	2014_07_04	2014_07_04_1_1	PE	P	E	14.75	14.75	25	14.75	1	1	1.5	40	1	1	1	0	0	0	0	0	0	1	25.125	0.75	25.875	14	2	16	20	3	23	9.5	2	0	2	6	5	1	0.545454545	5	5	6	grazed	0	0	0	0	0
2014_07	2014_07_04	2014_07_04_1_2	PE	P	E	14.75	14.75	25	14.75	1	1	1.5	40	1	1	1	0	0	0	0	0	0	1	25.125	0.75	25.875	14	2	16	20	3	23	9.5	2	0	2	6	5	1	0.545454545	5	5	6	avoided	0	0	0	0	0
2014_07	2014_07_04	2014_07_04_2_1	PE	P	E	14.75	14.75	25	14.75	1	1	1.5	40	1	1	1	0	0	0	0	0	0	1	25.125	0.75	25.875	14	2	16	20	3	23	9.5	2	0	2	6	5	1	0.545454545	5	5	6	grazed	0	0	0	0	0
2014_07	2014_07_04	2014_07_04_2_2	PE	P	E	14.75	14.75	25	14.75	1	1	1.5	40	1	1	1	0	0	0	0	0	0	1	25.125	0.75	25.875	14	2	16	20	3	23	9.5	2	0	2	6	5	1	0.545454545	5	5	6	avoided	0	0	0	0	0
2014_07	2014_07_04	2014_07_04_3_1	PE	P	E	14.75	14.75	25	14.75	1	1	1.5	40	1	1	1	0	0	0	0	0	0	1	25.125	0.75	25.875	14	2	16	20	3	23	9.5	2	0	2	6	5	1	0.545454545	5	5	6	grazed	0	0	0	0	0
2014_07	2014_07_04	2014_07_04_3_2	PE	P	E	14.75	14.75	25	14.75	1	1	1.5	40	1	1	1	0	0	0	0	0	0	1	25.125	0.75	25.875	14	2	16	20	3	23	9.5	2	0	2	6	5	1	0.545454545	5	5	6	avoided	0	0	0	0	0
2014_07	2014_07_04	2014_07_04_4_1	PE	P	E	14.75	14.75	25	14.75	1	1	1.5	40	1	1	1	0	0	0	0	0	0	1	25.125	0.75	25.875	14	2	16	20	3	23	9.5	2	0	2	6	5	1	0.545454545	5	5	6	grazed	1	0	0	0	0
2014_07	2014_07_04	2014_07_04_4_2	PE	P	E	14.75	14.75	25	14.75	1	1	1.5	40	1	1	1	0	0	0	0	0	0	1	25.125	0.75	25.875	14	2	16	20	3	23	9.5	2	0	2	6	5	1	0.545454545	5	5	6	avoided	0	0	0	0	0
2014_08	2014_08_01	2014_08_01_1_1	FE	F	E	49.02	37.5	69	37.5	0.76499388	0.76499388	2	10	1	0	1	1	1	0	0	0	0	0	30.125	1.75	31.875	16	2	18	22	2	24	10	1	1	2	7	7	0	0.56	4	7	7	grazed	0	0	0	0	0
2014_08	2014_08_01	2014_08_01_1_2	FE	F	E	49.02	37.5	69	37.5	0.76499388	0.76499388	2	10	1	0	1	1	1	0	0	0	0	0	30.125	1.75	31.875	16	2	18	22	2	24	10	1	1	2	7	7	0	0.56	4	7	7	avoided	0	0	0	0	0
2014_08	2014_08_01	2014_08_01_2_1	FE	F	E	49.02	37.5	69	37.5	0.76499388	0.76499388	2	10	1	0	1	1	1	0	0	0	0	0	30.125	1.75	31.875	16	2	18	22	2	24	10	1	1	2	7	7	0	0.56	4	7	7	grazed	0	0	0	0	0
2014_08	2014_08_01	2014_08_01_2_2	FE	F	E	49.02	37.5	69	37.5	0.76499388	0.76499388	2	10	1	0	1	1	1	0	0	0	0	0	30.125	1.75	31.875	16	2	18	22	2	24	10	1	1	2	7	7	0	0.56	4	7	7	avoided	0	0	0	0	0
2014_08	2014_08_01	2014_08_01_3_1	FE	F	E	49.02	37.5	69	37.5	0.76499388	0.76499388	2	10	1	0	1	1	1	0	0	0	0	0	30.125	1.75	31.875	16	2	18	22	2	24	10	1	1	2	7	7	0	0.56	4	7	7	grazed	0	0	0	0	0
2014_08	2014_08_01	2014_08_01_3_2	FE	F	E	49.02	37.5	69	37.5	0.76499388	0.76499388	2	10	1	0	1	1	1	0	0	0	0	0	30.125	1.75	31.875	16	2	18	22	2	24	10	1	1	2	7	7	0	0.56	4	7	7	avoided	0	0	0	0	0
2014_08	2014_08_01	2014_08_01_4_1	FE	F	E	49.02	37.5	69	37.5	0.76499388	0.76499388	2	10	1	0	1	1	1	0	0	0	0	0	30.125	1.75	31.875	16	2	18	22	2	24	10	1	1	2	7	7	0	0.56	4	7	7	grazed	0	0	0	0	0
2014_08	2014_08_01	2014_08_01_4_2	FE	F	E	49.02	37.5	69	37.5	0.76499388	0.76499388	2	10	1	0	1	1	1	0	0	0	0	0	30.125	1.75	31.875	16	2	18	22	2	24	10	1	1	2	7	7	0	0.56	4	7	7	avoided	0	0	0	0	0
2014_08	2014_08_02	2014_08_02_1_1	FE	F	E	49.02	37.5	69	37.5	0.76499388	0.76499388	2	10	1	0	1	1	1	0	0	0	0	0	28.5	7.5	36	11	1	12	22	2	24	10	0	2	2	7	3	4	0.4	2	7	3	grazed	0	0	0	0	0
2014_08	2014_08_02	2014_08_02_1_2	FE	F	E	49.02	37.5	69	37.5	0.76499388	0.76499388	2	10	1	0	1	1	1	0	0	0	0	0	28.5	7.5	36	11	1	12	22	2	24	10	0	2	2	7	3	4	0.4	2	7	3	avoided	0	0	0	0	0
2014_08	2014_08_02	2014_08_02_2_1	FE	F	E	49.02	37.5	69	37.5	0.76499388	0.76499388	2	10	1	0	1	1	1	0	0	0	0	0	28.5	7.5	36	11	1	12	22	2	24	10	0	2	2	7	3	4	0.4	2	7	3	grazed	0	0	0	0	0
2014_08	2014_08_02	2014_08_02_2_2	FE	F	E	49.02	37.5	69	37.5	0.76499388	0.76499388	2	10	1	0	1	1	1	0	0	0	0	0	28.5	7.5	36	11	1	12	22	2	24	10	0	2	2	7	3	4	0.4	2	7	3	avoided	0	0	0	0	0
2014_08	2014_08_02	2014_08_02_3_1	FE	F	E	49.02	37.5	69	37.5	0.76499388	0.76499388	2	10	1	0	1	1	1	0	0	0	0	0	28.5	7.5	36	11	1	12	22	2	24	10	0	2	2	7	3	4	0.4	2	7	3	grazed	0	0	0	0	0
2014_08	2014_08_02	2014_08_02_3_2	FE	F	E	49.02	37.5	69	37.5	0.76499388	0.76499388	2	10	1	0	1	1	1	0	0	0	0	0	28.5	7.5	36	11	1	12	22	2	24	10	0	2	2	7	3	4	0.4	2	7	3	avoided	0	0	0	0	0
2014_08	2014_08_02	2014_08_02_4_1	FE	F	E	49.02	37.5	69	37.5	0.76499388	0.76499388	2	10	1	0	1	1	1	0	0	0	0	0	28.5	7.5	36	11	1	12	22	2	24	10	0	2	2	7	3	4	0.4	2	7	3	grazed	0	0	0	0	0
2014_08	2014_08_02	2014_08_02_4_2	FE	F	E	49.02	37.5	69	37.5	0.76499388	0.76499388	2	10	1	0	1	1	1	0	0	0	0	0	28.5	7.5	36	11	1	12	22	2	24	10	0	2	2	7	3	4	0.4	2	7	3	avoided	0	0	0	0	0
NA	2014_08_03	2014_08_03_1_1	NA	NA	NA	NA	NA	NA	NA	NA	NA	NA	NA	NA	NA	NA	NA	NA	NA	NA	NA	NA	NA	NA	NA	NA	NA	NA	NA	NA	NA	NA	NA	NA	NA	NA	NA	NA	NA	NA	NA	NA	NA	grazed	0	0	0	0	0
NA	2014_08_03	2014_08_03_1_2	NA	NA	NA	NA	NA	NA	NA	NA	NA	NA	NA	NA	NA	NA	NA	NA	NA	NA	NA	NA	NA	NA	NA	NA	NA	NA	NA	NA	NA	NA	NA	NA	NA	NA	NA	NA	NA	NA	NA	NA	NA	avoided	0	0	0	0	0
NA	2014_08_03	2014_08_03_2_1	NA	NA	NA	NA	NA	NA	NA	NA	NA	NA	NA	NA	NA	NA	NA	NA	NA	NA	NA	NA	NA	NA	NA	NA	NA	NA	NA	NA	NA	NA	NA	NA	NA	NA	NA	NA	NA	NA	NA	NA	NA	grazed	0	0	0	0	0
NA	2014_08_03	2014_08_03_2_2	NA	NA	NA	NA	NA	NA	NA	NA	NA	NA	NA	NA	NA	NA	NA	NA	NA	NA	NA	NA	NA	NA	NA	NA	NA	NA	NA	NA	NA	NA	NA	NA	NA	NA	NA	NA	NA	NA	NA	NA	NA	avoided	0	0	0	0	0
NA	2014_08_03	2014_08_03_3_1	NA	NA	NA	NA	NA	NA	NA	NA	NA	NA	NA	NA	NA	NA	NA	NA	NA	NA	NA	NA	NA	NA	NA	NA	NA	NA	NA	NA	NA	NA	NA	NA	NA	NA	NA	NA	NA	NA	NA	NA	NA	grazed	0	0	0	0	0
NA	2014_08_03	2014_08_03_3_2	NA	NA	NA	NA	NA	NA	NA	NA	NA	NA	NA	NA	NA	NA	NA	NA	NA	NA	NA	NA	NA	NA	NA	NA	NA	NA	NA	NA	NA	NA	NA	NA	NA	NA	NA	NA	NA	NA	NA	NA	NA	avoided	0	0	0	0	0
NA	2014_08_03	2014_08_03_4_1	NA	NA	NA	NA	NA	NA	NA	NA	NA	NA	NA	NA	NA	NA	NA	NA	NA	NA	NA	NA	NA	NA	NA	NA	NA	NA	NA	NA	NA	NA	NA	NA	NA	NA	NA	NA	NA	NA	NA	NA	NA	grazed	0	0	0	0	0
NA	2014_08_03	2014_08_03_4_2	NA	NA	NA	NA	NA	NA	NA	NA	NA	NA	NA	NA	NA	NA	NA	NA	NA	NA	NA	NA	NA	NA	NA	NA	NA	NA	NA	NA	NA	NA	NA	NA	NA	NA	NA	NA	NA	NA	NA	NA	NA	avoided	0	0	0	0	0
2014_08	2014_08_04	2014_08_04_1_1	FE	F	E	49.02	37.5	69	37.5	0.76499388	0.76499388	2	10	1	1	1	1	0	0	0	0	1	1	14.625	0.625	15.25	12	1	13	22	2	24	10	2	0	2	7	4	3	0.555555556	2	6	5	grazed	0	0	0	0	0
2014_08	2014_08_04	2014_08_04_1_2	FE	F	E	49.02	37.5	69	37.5	0.76499388	0.76499388	2	10	1	1	1	1	0	0	0	0	1	1	14.625	0.625	15.25	12	1	13	22	2	24	10	2	0	2	7	4	3	0.555555556	2	6	5	avoided	0	0	0	0	0
2014_08	2014_08_04	2014_08_04_2_1	FE	F	E	49.02	37.5	69	37.5	0.76499388	0.76499388	2	10	1	1	1	1	0	0	0	0	1	1	14.625	0.625	15.25	12	1	13	22	2	24	10	2	0	2	7	4	3	0.555555556	2	6	5	grazed	0	0	0	0	0
2014_08	2014_08_04	2014_08_04_2_2	FE	F	E	49.02	37.5	69	37.5	0.76499388	0.76499388	2	10	1	1	1	1	0	0	0	0	1	1	14.625	0.625	15.25	12	1	13	22	2	24	10	2	0	2	7	4	3	0.555555556	2	6	5	avoided	0	0	0	0	0
2014_08	2014_08_04	2014_08_04_3_1	FE	F	E	49.02	37.5	69	37.5	0.76499388	0.76499388	2	10	1	1	1	1	0	0	0	0	1	1	14.625	0.625	15.25	12	1	13	22	2	24	10	2	0	2	7	4	3	0.555555556	2	6	5	grazed	0	0	0	0	0
2014_08	2014_08_04	2014_08_04_3_2	FE	F	E	49.02	37.5	69	37.5	0.76499388	0.76499388	2	10	1	1	1	1	0	0	0	0	1	1	14.625	0.625	15.25	12	1	13	22	2	24	10	2	0	2	7	4	3	0.555555556	2	6	5	avoided	0	0	0	0	0
2014_08	2014_08_04	2014_08_04_4_1	FE	F	E	49.02	37.5	69	37.5	0.76499388	0.76499388	2	10	1	1	1	1	0	0	0	0	1	1	14.625	0.625	15.25	12	1	13	22	2	24	10	2	0	2	7	4	3	0.555555556	2	6	5	grazed	0	0	0	0	0
2014_08	2014_08_04	2014_08_04_4_2	FE	F	E	49.02	37.5	69	37.5	0.76499388	0.76499388	2	10	1	1	1	1	0	0	0	0	1	1	14.625	0.625	15.25	12	1	13	22	2	24	10	2	0	2	7	4	3	0.555555556	2	6	5	avoided	0	0	0	0	0
2014_09	2014_09_01	2014_09_01_1_1	FE	F	E	434	38.3	70	38.3	0.088248848	0.088248848	2.5	0	0	1	1	NA	1	0	0	0	1	0	17	0.5	17.5	10	1	11	14	1	15	7.75	1	1	2	7	5	2	0.777777778	3	1	7	grazed	0	0	0	0	0
2014_09	2014_09_01	2014_09_01_1_2	FE	F	E	434	38.3	70	38.3	0.088248848	0.088248848	2.5	0	0	1	1	NA	1	0	0	0	1	0	17	0.5	17.5	10	1	11	14	1	15	7.75	1	1	2	7	5	2	0.777777778	3	1	7	avoided	0	0	0	0	0
2014_09	2014_09_01	2014_09_01_2_1	FE	F	E	434	38.3	70	38.3	0.088248848	0.088248848	2.5	0	0	1	1	NA	1	0	0	0	1	0	17	0.5	17.5	10	1	11	14	1	15	7.75	1	1	2	7	5	2	0.777777778	3	1	7	grazed	0	0	0	0	0
2014_09	2014_09_01	2014_09_01_2_2	FE	F	E	434	38.3	70	38.3	0.088248848	0.088248848	2.5	0	0	1	1	NA	1	0	0	0	1	0	17	0.5	17.5	10	1	11	14	1	15	7.75	1	1	2	7	5	2	0.777777778	3	1	7	avoided	0	0	0	0	0
2014_09	2014_09_01	2014_09_01_3_1	FE	F	E	434	38.3	70	38.3	0.088248848	0.088248848	2.5	0	0	1	1	NA	1	0	0	0	1	0	17	0.5	17.5	10	1	11	14	1	15	7.75	1	1	2	7	5	2	0.777777778	3	1	7	grazed	0	0	0	0	0
2014_09	2014_09_01	2014_09_01_3_2	FE	F	E	434	38.3	70	38.3	0.088248848	0.088248848	2.5	0	0	1	1	NA	1	0	0	0	1	0	17	0.5	17.5	10	1	11	14	1	15	7.75	1	1	2	7	5	2	0.777777778	3	1	7	avoided	0	0	0	0	0
2014_09	2014_09_01	2014_09_01_4_1	FE	F	E	434	38.3	70	38.3	0.088248848	0.088248848	2.5	0	0	1	1	NA	1	0	0	0	1	0	17	0.5	17.5	10	1	11	14	1	15	7.75	1	1	2	7	5	2	0.777777778	3	1	7	grazed	0	0	0	0	0
2014_09	2014_09_01	2014_09_01_4_2	FE	F	E	434	38.3	70	38.3	0.088248848	0.088248848	2.5	0	0	1	1	NA	1	0	0	0	1	0	17	0.5	17.5	10	1	11	14	1	15	7.75	1	1	2	7	5	2	0.777777778	3	1	7	avoided	0	0	0	0	0
2014_09	2014_09_02	2014_09_02_1_1	FE	F	E	434	38.3	70	38.3	0.088248848	0.088248848	2.5	0	0	1	1	NA	1	0	0	1	0	0	20.375	3.25	23.625	7	1	8	14	1	15	7.75	1	1	2	7	4	3	0.4	4	2	2	grazed	0	0	0	0	0
2014_09	2014_09_02	2014_09_02_1_2	FE	F	E	434	38.3	70	38.3	0.088248848	0.088248848	2.5	0	0	1	1	NA	1	0	0	1	0	0	20.375	3.25	23.625	7	1	8	14	1	15	7.75	1	1	2	7	4	3	0.4	4	2	2	avoided	0	0	0	0	0
2014_09	2014_09_02	2014_09_02_2_1	FE	F	E	434	38.3	70	38.3	0.088248848	0.088248848	2.5	0	0	1	1	NA	1	0	0	1	0	0	20.375	3.25	23.625	7	1	8	14	1	15	7.75	1	1	2	7	4	3	0.4	4	2	2	grazed	0	0	0	0	0
2014_09	2014_09_02	2014_09_02_2_2	FE	F	E	434	38.3	70	38.3	0.088248848	0.088248848	2.5	0	0	1	1	NA	1	0	0	1	0	0	20.375	3.25	23.625	7	1	8	14	1	15	7.75	1	1	2	7	4	3	0.4	4	2	2	avoided	0	0	0	0	0
2014_09	2014_09_02	2014_09_02_3_1	FE	F	E	434	38.3	70	38.3	0.088248848	0.088248848	2.5	0	0	1	1	NA	1	0	0	1	0	0	20.375	3.25	23.625	7	1	8	14	1	15	7.75	1	1	2	7	4	3	0.4	4	2	2	grazed	0	0	0	0	0
2014_09	2014_09_02	2014_09_02_3_2	FE	F	E	434	38.3	70	38.3	0.088248848	0.088248848	2.5	0	0	1	1	NA	1	0	0	1	0	0	20.375	3.25	23.625	7	1	8	14	1	15	7.75	1	1	2	7	4	3	0.4	4	2	2	avoided	0	0	0	0	0
2014_09	2014_09_02	2014_09_02_4_1	FE	F	E	434	38.3	70	38.3	0.088248848	0.088248848	2.5	0	0	1	1	NA	1	0	0	1	0	0	20.375	3.25	23.625	7	1	8	14	1	15	7.75	1	1	2	7	4	3	0.4	4	2	2	grazed	0	0	0	0	0
2014_09	2014_09_02	2014_09_02_4_2	FE	F	E	434	38.3	70	38.3	0.088248848	0.088248848	2.5	0	0	1	1	NA	1	0	0	1	0	0	20.375	3.25	23.625	7	1	8	14	1	15	7.75	1	1	2	7	4	3	0.4	4	2	2	avoided	0	0	0	0	0
NA	2014_09_03	2014_09_03_1_1	NA	NA	NA	NA	NA	NA	NA	NA	NA	NA	NA	NA	NA	NA	NA	NA	NA	NA	NA	NA	NA	NA	NA	NA	NA	NA	NA	NA	NA	NA	NA	NA	NA	NA	NA	NA	NA	NA	NA	NA	NA	grazed	0	0	0	0	0
NA	2014_09_03	2014_09_03_1_2	NA	NA	NA	NA	NA	NA	NA	NA	NA	NA	NA	NA	NA	NA	NA	NA	NA	NA	NA	NA	NA	NA	NA	NA	NA	NA	NA	NA	NA	NA	NA	NA	NA	NA	NA	NA	NA	NA	NA	NA	NA	avoided	0	0	0	0	0
NA	2014_09_03	2014_09_03_2_1	NA	NA	NA	NA	NA	NA	NA	NA	NA	NA	NA	NA	NA	NA	NA	NA	NA	NA	NA	NA	NA	NA	NA	NA	NA	NA	NA	NA	NA	NA	NA	NA	NA	NA	NA	NA	NA	NA	NA	NA	NA	grazed	0	0	0	0	0
NA	2014_09_03	2014_09_03_2_2	NA	NA	NA	NA	NA	NA	NA	NA	NA	NA	NA	NA	NA	NA	NA	NA	NA	NA	NA	NA	NA	NA	NA	NA	NA	NA	NA	NA	NA	NA	NA	NA	NA	NA	NA	NA	NA	NA	NA	NA	NA	avoided	0	0	0	0	0
NA	2014_09_03	2014_09_03_3_1	NA	NA	NA	NA	NA	NA	NA	NA	NA	NA	NA	NA	NA	NA	NA	NA	NA	NA	NA	NA	NA	NA	NA	NA	NA	NA	NA	NA	NA	NA	NA	NA	NA	NA	NA	NA	NA	NA	NA	NA	NA	grazed	0	0	0	0	0
NA	2014_09_03	2014_09_03_3_2	NA	NA	NA	NA	NA	NA	NA	NA	NA	NA	NA	NA	NA	NA	NA	NA	NA	NA	NA	NA	NA	NA	NA	NA	NA	NA	NA	NA	NA	NA	NA	NA	NA	NA	NA	NA	NA	NA	NA	NA	NA	avoided	0	0	0	0	0
NA	2014_09_03	2014_09_03_4_1	NA	NA	NA	NA	NA	NA	NA	NA	NA	NA	NA	NA	NA	NA	NA	NA	NA	NA	NA	NA	NA	NA	NA	NA	NA	NA	NA	NA	NA	NA	NA	NA	NA	NA	NA	NA	NA	NA	NA	NA	NA	grazed	0	0	0	0	0
NA	2014_09_03	2014_09_03_4_2	NA	NA	NA	NA	NA	NA	NA	NA	NA	NA	NA	NA	NA	NA	NA	NA	NA	NA	NA	NA	NA	NA	NA	NA	NA	NA	NA	NA	NA	NA	NA	NA	NA	NA	NA	NA	NA	NA	NA	NA	NA	avoided	0	0	0	0	0
2014_09	2014_09_04	2014_09_04_1_1	FE	F	E	434	38.3	70	38.3	0.088248848	0.088248848	2.5	0	0	1	1	NA	NA	0	0	1	1	1	4.25	0	4.25	8	0	8	14	1	15	7.75	1	1	2	7	3	4	0.666666667	1	3	4	grazed	0	0	0	0	0
2014_09	2014_09_04	2014_09_04_1_2	FE	F	E	434	38.3	70	38.3	0.088248848	0.088248848	2.5	0	0	1	1	NA	NA	0	0	1	1	1	4.25	0	4.25	8	0	8	14	1	15	7.75	1	1	2	7	3	4	0.666666667	1	3	4	avoided	0	0	0	0	0
2014_09	2014_09_04	2014_09_04_2_1	FE	F	E	434	38.3	70	38.3	0.088248848	0.088248848	2.5	0	0	1	1	NA	NA	0	0	1	1	1	4.25	0	4.25	8	0	8	14	1	15	7.75	1	1	2	7	3	4	0.666666667	1	3	4	grazed	0	0	0	0	0
2014_09	2014_09_04	2014_09_04_2_2	FE	F	E	434	38.3	70	38.3	0.088248848	0.088248848	2.5	0	0	1	1	NA	NA	0	0	1	1	1	4.25	0	4.25	8	0	8	14	1	15	7.75	1	1	2	7	3	4	0.666666667	1	3	4	avoided	0	0	0	0	0
2014_09	2014_09_04	2014_09_04_3_1	FE	F	E	434	38.3	70	38.3	0.088248848	0.088248848	2.5	0	0	1	1	NA	NA	0	0	1	1	1	4.25	0	4.25	8	0	8	14	1	15	7.75	1	1	2	7	3	4	0.666666667	1	3	4	grazed	0	0	0	0	0
2014_09	2014_09_04	2014_09_04_3_2	FE	F	E	434	38.3	70	38.3	0.088248848	0.088248848	2.5	0	0	1	1	NA	NA	0	0	1	1	1	4.25	0	4.25	8	0	8	14	1	15	7.75	1	1	2	7	3	4	0.666666667	1	3	4	avoided	0	0	0	0	0
2014_09	2014_09_04	2014_09_04_4_1	FE	F	E	434	38.3	70	38.3	0.088248848	0.088248848	2.5	0	0	1	1	NA	NA	0	0	1	1	1	4.25	0	4.25	8	0	8	14	1	15	7.75	1	1	2	7	3	4	0.666666667	1	3	4	grazed	0	0	0	0	0
2014_09	2014_09_04	2014_09_04_4_2	FE	F	E	434	38.3	70	38.3	0.088248848	0.088248848	2.5	0	0	1	1	NA	NA	0	0	1	1	1	4.25	0	4.25	8	0	8	14	1	15	7.75	1	1	2	7	3	4	0.666666667	1	3	4	avoided	0	0	0	0	0
NA	2014_10_01	2014_10_01_1_1	NA	NA	NA	NA	NA	NA	NA	NA	NA	NA	NA	NA	NA	NA	NA	NA	NA	NA	NA	NA	NA	NA	NA	NA	NA	NA	NA	NA	NA	NA	NA	NA	NA	NA	NA	NA	NA	NA	NA	NA	NA	grazed	0	0	0	0	0
NA	2014_10_01	2014_10_01_1_2	NA	NA	NA	NA	NA	NA	NA	NA	NA	NA	NA	NA	NA	NA	NA	NA	NA	NA	NA	NA	NA	NA	NA	NA	NA	NA	NA	NA	NA	NA	NA	NA	NA	NA	NA	NA	NA	NA	NA	NA	NA	avoided	0	0	0	0	0
NA	2014_10_01	2014_10_01_2_1	NA	NA	NA	NA	NA	NA	NA	NA	NA	NA	NA	NA	NA	NA	NA	NA	NA	NA	NA	NA	NA	NA	NA	NA	NA	NA	NA	NA	NA	NA	NA	NA	NA	NA	NA	NA	NA	NA	NA	NA	NA	grazed	0	0	0	0	0
NA	2014_10_01	2014_10_01_2_2	NA	NA	NA	NA	NA	NA	NA	NA	NA	NA	NA	NA	NA	NA	NA	NA	NA	NA	NA	NA	NA	NA	NA	NA	NA	NA	NA	NA	NA	NA	NA	NA	NA	NA	NA	NA	NA	NA	NA	NA	NA	avoided	0	0	0	0	0
NA	2014_10_01	2014_10_01_3_1	NA	NA	NA	NA	NA	NA	NA	NA	NA	NA	NA	NA	NA	NA	NA	NA	NA	NA	NA	NA	NA	NA	NA	NA	NA	NA	NA	NA	NA	NA	NA	NA	NA	NA	NA	NA	NA	NA	NA	NA	NA	grazed	0	0	0	0	0
NA	2014_10_01	2014_10_01_3_2	NA	NA	NA	NA	NA	NA	NA	NA	NA	NA	NA	NA	NA	NA	NA	NA	NA	NA	NA	NA	NA	NA	NA	NA	NA	NA	NA	NA	NA	NA	NA	NA	NA	NA	NA	NA	NA	NA	NA	NA	NA	avoided	0	0	0	0	0
NA	2014_10_01	2014_10_01_4_1	NA	NA	NA	NA	NA	NA	NA	NA	NA	NA	NA	NA	NA	NA	NA	NA	NA	NA	NA	NA	NA	NA	NA	NA	NA	NA	NA	NA	NA	NA	NA	NA	NA	NA	NA	NA	NA	NA	NA	NA	NA	grazed	0	0	0	0	0
NA	2014_10_01	2014_10_01_4_2	NA	NA	NA	NA	NA	NA	NA	NA	NA	NA	NA	NA	NA	NA	NA	NA	NA	NA	NA	NA	NA	NA	NA	NA	NA	NA	NA	NA	NA	NA	NA	NA	NA	NA	NA	NA	NA	NA	NA	NA	NA	avoided	0	0	0	0	0
2014_10	2014_10_02	2014_10_02_1_1	FE	F	E	350	245	90	60	0.7	0.171428571	12	0	1	1	1	0	0	0	0	0	1	0	5	2.25	7.25	9	1	10	10	2	12	6	2	1	3	6	6	0	0.823529412	2	1	7	grazed	0	0	0	0	0
2014_10	2014_10_02	2014_10_02_1_2	FE	F	E	350	245	90	60	0.7	0.171428571	12	0	1	1	1	0	0	0	0	0	1	0	5	2.25	7.25	9	1	10	10	2	12	6	2	1	3	6	6	0	0.823529412	2	1	7	avoided	0	0	0	0	0
2014_10	2014_10_02	2014_10_02_2_1	FE	F	E	350	245	90	60	0.7	0.171428571	12	0	1	1	1	0	0	0	0	0	1	0	5	2.25	7.25	9	1	10	10	2	12	6	2	1	3	6	6	0	0.823529412	2	1	7	grazed	0	0	0	0	0
2014_10	2014_10_02	2014_10_02_2_2	FE	F	E	350	245	90	60	0.7	0.171428571	12	0	1	1	1	0	0	0	0	0	1	0	5	2.25	7.25	9	1	10	10	2	12	6	2	1	3	6	6	0	0.823529412	2	1	7	avoided	0	0	0	0	0
2014_10	2014_10_02	2014_10_02_3_1	FE	F	E	350	245	90	60	0.7	0.171428571	12	0	1	1	1	0	0	0	0	0	1	0	5	2.25	7.25	9	1	10	10	2	12	6	2	1	3	6	6	0	0.823529412	2	1	7	grazed	0	0	0	0	0
2014_10	2014_10_02	2014_10_02_3_2	FE	F	E	350	245	90	60	0.7	0.171428571	12	0	1	1	1	0	0	0	0	0	1	0	5	2.25	7.25	9	1	10	10	2	12	6	2	1	3	6	6	0	0.823529412	2	1	7	avoided	0	0	0	0	0
2014_10	2014_10_02	2014_10_02_4_1	FE	F	E	350	245	90	60	0.7	0.171428571	12	0	1	1	1	0	0	0	0	0	1	0	5	2.25	7.25	9	1	10	10	2	12	6	2	1	3	6	6	0	0.823529412	2	1	7	grazed	0	0	0	0	0
2014_10	2014_10_02	2014_10_02_4_2	FE	F	E	350	245	90	60	0.7	0.171428571	12	0	1	1	1	0	0	0	0	0	1	0	5	2.25	7.25	9	1	10	10	2	12	6	2	1	3	6	6	0	0.823529412	2	1	7	avoided	0	0	0	0	0
NA	2014_10_03	2014_10_03_1_1	NA	NA	NA	NA	NA	NA	NA	NA	NA	NA	NA	NA	NA	NA	NA	NA	NA	NA	NA	NA	NA	NA	NA	NA	NA	NA	NA	NA	NA	NA	NA	NA	NA	NA	NA	NA	NA	NA	NA	NA	NA	grazed	0	0	0	0	0
NA	2014_10_03	2014_10_03_1_2	NA	NA	NA	NA	NA	NA	NA	NA	NA	NA	NA	NA	NA	NA	NA	NA	NA	NA	NA	NA	NA	NA	NA	NA	NA	NA	NA	NA	NA	NA	NA	NA	NA	NA	NA	NA	NA	NA	NA	NA	NA	avoided	0	0	0	0	0
NA	2014_10_03	2014_10_03_2_1	NA	NA	NA	NA	NA	NA	NA	NA	NA	NA	NA	NA	NA	NA	NA	NA	NA	NA	NA	NA	NA	NA	NA	NA	NA	NA	NA	NA	NA	NA	NA	NA	NA	NA	NA	NA	NA	NA	NA	NA	NA	grazed	0	0	0	0	0
NA	2014_10_03	2014_10_03_2_2	NA	NA	NA	NA	NA	NA	NA	NA	NA	NA	NA	NA	NA	NA	NA	NA	NA	NA	NA	NA	NA	NA	NA	NA	NA	NA	NA	NA	NA	NA	NA	NA	NA	NA	NA	NA	NA	NA	NA	NA	NA	avoided	0	0	0	0	0
NA	2014_10_03	2014_10_03_3_1	NA	NA	NA	NA	NA	NA	NA	NA	NA	NA	NA	NA	NA	NA	NA	NA	NA	NA	NA	NA	NA	NA	NA	NA	NA	NA	NA	NA	NA	NA	NA	NA	NA	NA	NA	NA	NA	NA	NA	NA	NA	grazed	0	0	0	0	0
NA	2014_10_03	2014_10_03_3_2	NA	NA	NA	NA	NA	NA	NA	NA	NA	NA	NA	NA	NA	NA	NA	NA	NA	NA	NA	NA	NA	NA	NA	NA	NA	NA	NA	NA	NA	NA	NA	NA	NA	NA	NA	NA	NA	NA	NA	NA	NA	avoided	0	0	0	0	0
NA	2014_10_03	2014_10_03_4_1	NA	NA	NA	NA	NA	NA	NA	NA	NA	NA	NA	NA	NA	NA	NA	NA	NA	NA	NA	NA	NA	NA	NA	NA	NA	NA	NA	NA	NA	NA	NA	NA	NA	NA	NA	NA	NA	NA	NA	NA	NA	grazed	0	0	0	0	0
NA	2014_10_03	2014_10_03_4_2	NA	NA	NA	NA	NA	NA	NA	NA	NA	NA	NA	NA	NA	NA	NA	NA	NA	NA	NA	NA	NA	NA	NA	NA	NA	NA	NA	NA	NA	NA	NA	NA	NA	NA	NA	NA	NA	NA	NA	NA	NA	avoided	0	0	0	0	0
2014_10	2014_10_04	2014_10_04_1_1	FE	F	E	350	245	90	60	0.7	0.171428571	12	0	1	1	1	0	0	0	0	0	1	1	0.625	0.125	0.75	4	2	6	10	2	12	6	3	0	3	6	2	4	0.285714286	3	2	1	grazed	0	0	0	0	0
2014_10	2014_10_04	2014_10_04_1_2	FE	F	E	350	245	90	60	0.7	0.171428571	12	0	1	1	1	0	0	0	0	0	1	1	0.625	0.125	0.75	4	2	6	10	2	12	6	3	0	3	6	2	4	0.285714286	3	2	1	avoided	0	0	0	0	0
2014_10	2014_10_04	2014_10_04_2_1	FE	F	E	350	245	90	60	0.7	0.171428571	12	0	1	1	1	0	0	0	0	0	1	1	0.625	0.125	0.75	4	2	6	10	2	12	6	3	0	3	6	2	4	0.285714286	3	2	1	grazed	0	0	0	0	0
2014_10	2014_10_04	2014_10_04_2_2	FE	F	E	350	245	90	60	0.7	0.171428571	12	0	1	1	1	0	0	0	0	0	1	1	0.625	0.125	0.75	4	2	6	10	2	12	6	3	0	3	6	2	4	0.285714286	3	2	1	avoided	0	0	0	0	0
2014_10	2014_10_04	2014_10_04_3_1	FE	F	E	350	245	90	60	0.7	0.171428571	12	0	1	1	1	0	0	0	0	0	1	1	0.625	0.125	0.75	4	2	6	10	2	12	6	3	0	3	6	2	4	0.285714286	3	2	1	grazed	0	0	0	0	0
2014_10	2014_10_04	2014_10_04_3_2	FE	F	E	350	245	90	60	0.7	0.171428571	12	0	1	1	1	0	0	0	0	0	1	1	0.625	0.125	0.75	4	2	6	10	2	12	6	3	0	3	6	2	4	0.285714286	3	2	1	avoided	0	0	0	0	0
2014_10	2014_10_04	2014_10_04_4_1	FE	F	E	350	245	90	60	0.7	0.171428571	12	0	1	1	1	0	0	0	0	0	1	1	0.625	0.125	0.75	4	2	6	10	2	12	6	3	0	3	6	2	4	0.285714286	3	2	1	grazed	0	0	0	0	0
2014_10	2014_10_04	2014_10_04_4_2	FE	F	E	350	245	90	60	0.7	0.171428571	12	0	1	1	1	0	0	0	0	0	1	1	0.625	0.125	0.75	4	2	6	10	2	12	6	3	0	3	6	2	4	0.285714286	3	2	1	avoided	0	0	0	0	0
2014_11	2014_11_01	2014_11_01_1_1	FE	F	E	38	30	85	NA	0.789473684	NA	2	0	0	1	1	0	1	0	0	0	0	0	28.375	1.25	29.625	4	1	5	9	1	10	4.25	0	0	0	5	3	2	0.333333333	3	1	1	grazed	0	0	0	0	0
2014_11	2014_11_01	2014_11_01_1_2	FE	F	E	38	30	85	NA	0.789473684	NA	2	0	0	1	1	0	1	0	0	0	0	0	28.375	1.25	29.625	4	1	5	9	1	10	4.25	0	0	0	5	3	2	0.333333333	3	1	1	avoided	0	0	0	0	0
2014_11	2014_11_01	2014_11_01_2_1	FE	F	E	38	30	85	NA	0.789473684	NA	2	0	0	1	1	0	1	0	0	0	0	0	28.375	1.25	29.625	4	1	5	9	1	10	4.25	0	0	0	5	3	2	0.333333333	3	1	1	grazed	0	0	0	0	0
2014_11	2014_11_01	2014_11_01_2_2	FE	F	E	38	30	85	NA	0.789473684	NA	2	0	0	1	1	0	1	0	0	0	0	0	28.375	1.25	29.625	4	1	5	9	1	10	4.25	0	0	0	5	3	2	0.333333333	3	1	1	avoided	0	0	0	0	0
2014_11	2014_11_01	2014_11_01_3_1	FE	F	E	38	30	85	NA	0.789473684	NA	2	0	0	1	1	0	1	0	0	0	0	0	28.375	1.25	29.625	4	1	5	9	1	10	4.25	0	0	0	5	3	2	0.333333333	3	1	1	grazed	0	0	0	0	0
2014_11	2014_11_01	2014_11_01_3_2	FE	F	E	38	30	85	NA	0.789473684	NA	2	0	0	1	1	0	1	0	0	0	0	0	28.375	1.25	29.625	4	1	5	9	1	10	4.25	0	0	0	5	3	2	0.333333333	3	1	1	avoided	0	0	0	0	0
2014_11	2014_11_01	2014_11_01_4_1	FE	F	E	38	30	85	NA	0.789473684	NA	2	0	0	1	1	0	1	0	0	0	0	0	28.375	1.25	29.625	4	1	5	9	1	10	4.25	0	0	0	5	3	2	0.333333333	3	1	1	grazed	0	0	0	0	0
2014_11	2014_11_01	2014_11_01_4_2	FE	F	E	38	30	85	NA	0.789473684	NA	2	0	0	1	1	0	1	0	0	0	0	0	28.375	1.25	29.625	4	1	5	9	1	10	4.25	0	0	0	5	3	2	0.333333333	3	1	1	avoided	0	0	0	0	0
NA	2014_11_02	2014_11_02_1_1	NA	NA	NA	NA	NA	NA	NA	NA	NA	NA	NA	NA	NA	NA	NA	NA	NA	NA	NA	NA	NA	NA	NA	NA	NA	NA	NA	NA	NA	NA	NA	NA	NA	NA	NA	NA	NA	NA	NA	NA	NA	grazed	0	0	0	0	0
NA	2014_11_02	2014_11_02_1_2	NA	NA	NA	NA	NA	NA	NA	NA	NA	NA	NA	NA	NA	NA	NA	NA	NA	NA	NA	NA	NA	NA	NA	NA	NA	NA	NA	NA	NA	NA	NA	NA	NA	NA	NA	NA	NA	NA	NA	NA	NA	avoided	0	0	0	0	0
NA	2014_11_02	2014_11_02_2_1	NA	NA	NA	NA	NA	NA	NA	NA	NA	NA	NA	NA	NA	NA	NA	NA	NA	NA	NA	NA	NA	NA	NA	NA	NA	NA	NA	NA	NA	NA	NA	NA	NA	NA	NA	NA	NA	NA	NA	NA	NA	grazed	0	0	0	0	0
NA	2014_11_02	2014_11_02_2_2	NA	NA	NA	NA	NA	NA	NA	NA	NA	NA	NA	NA	NA	NA	NA	NA	NA	NA	NA	NA	NA	NA	NA	NA	NA	NA	NA	NA	NA	NA	NA	NA	NA	NA	NA	NA	NA	NA	NA	NA	NA	avoided	0	0	0	0	0
NA	2014_11_02	2014_11_02_3_1	NA	NA	NA	NA	NA	NA	NA	NA	NA	NA	NA	NA	NA	NA	NA	NA	NA	NA	NA	NA	NA	NA	NA	NA	NA	NA	NA	NA	NA	NA	NA	NA	NA	NA	NA	NA	NA	NA	NA	NA	NA	grazed	0	0	0	0	0
NA	2014_11_02	2014_11_02_3_2	NA	NA	NA	NA	NA	NA	NA	NA	NA	NA	NA	NA	NA	NA	NA	NA	NA	NA	NA	NA	NA	NA	NA	NA	NA	NA	NA	NA	NA	NA	NA	NA	NA	NA	NA	NA	NA	NA	NA	NA	NA	avoided	0	0	0	0	0
NA	2014_11_02	2014_11_02_4_1	NA	NA	NA	NA	NA	NA	NA	NA	NA	NA	NA	NA	NA	NA	NA	NA	NA	NA	NA	NA	NA	NA	NA	NA	NA	NA	NA	NA	NA	NA	NA	NA	NA	NA	NA	NA	NA	NA	NA	NA	NA	grazed	0	0	0	0	0
NA	2014_11_02	2014_11_02_4_2	NA	NA	NA	NA	NA	NA	NA	NA	NA	NA	NA	NA	NA	NA	NA	NA	NA	NA	NA	NA	NA	NA	NA	NA	NA	NA	NA	NA	NA	NA	NA	NA	NA	NA	NA	NA	NA	NA	NA	NA	NA	avoided	0	0	0	0	0
2014_11	2014_11_03	2014_11_03_1_1	FE	F	E	38	30	85	NA	0.789473684	NA	2	0	1	0	1	0	0	0	0	0	0	1	31.375	0.375	31.75	6	1	7	9	1	10	4.25	0	0	0	5	4	1	0.444444444	2	3	2	grazed	0	0	0	0	0
2014_11	2014_11_03	2014_11_03_1_2	FE	F	E	38	30	85	NA	0.789473684	NA	2	0	1	0	1	0	0	0	0	0	0	1	31.375	0.375	31.75	6	1	7	9	1	10	4.25	0	0	0	5	4	1	0.444444444	2	3	2	avoided	0	0	0	0	0
2014_11	2014_11_03	2014_11_03_2_1	FE	F	E	38	30	85	NA	0.789473684	NA	2	0	1	0	1	0	0	0	0	0	0	1	31.375	0.375	31.75	6	1	7	9	1	10	4.25	0	0	0	5	4	1	0.444444444	2	3	2	grazed	0	0	0	0	0
2014_11	2014_11_03	2014_11_03_2_2	FE	F	E	38	30	85	NA	0.789473684	NA	2	0	1	0	1	0	0	0	0	0	0	1	31.375	0.375	31.75	6	1	7	9	1	10	4.25	0	0	0	5	4	1	0.444444444	2	3	2	avoided	0	0	0	0	0
2014_11	2014_11_03	2014_11_03_3_1	FE	F	E	38	30	85	NA	0.789473684	NA	2	0	1	0	1	0	0	0	0	0	0	1	31.375	0.375	31.75	6	1	7	9	1	10	4.25	0	0	0	5	4	1	0.444444444	2	3	2	grazed	0	0	0	0	0
2014_11	2014_11_03	2014_11_03_3_2	FE	F	E	38	30	85	NA	0.789473684	NA	2	0	1	0	1	0	0	0	0	0	0	1	31.375	0.375	31.75	6	1	7	9	1	10	4.25	0	0	0	5	4	1	0.444444444	2	3	2	avoided	0	0	0	0	0
2014_11	2014_11_03	2014_11_03_4_1	FE	F	E	38	30	85	NA	0.789473684	NA	2	0	1	0	1	0	0	0	0	0	0	1	31.375	0.375	31.75	6	1	7	9	1	10	4.25	0	0	0	5	4	1	0.444444444	2	3	2	grazed	0	0	0	0	0
2014_11	2014_11_03	2014_11_03_4_2	FE	F	E	38	30	85	NA	0.789473684	NA	2	0	1	0	1	0	0	0	0	0	0	1	31.375	0.375	31.75	6	1	7	9	1	10	4.25	0	0	0	5	4	1	0.444444444	2	3	2	avoided	0	0	0	0	0
2014_11	2014_11_04	2014_11_04_1_1	FE	F	E	38	30	85	NA	0.789473684	NA	2	0	1	1	1	0	1	0	0	0	0	1	32.625	0.375	33	5	1	6	9	1	10	4.25	0	0	0	5	3	2	0.285714286	2	3	1	grazed	0	0	0	0	0
2014_11	2014_11_04	2014_11_04_1_2	FE	F	E	38	30	85	NA	0.789473684	NA	2	0	1	1	1	0	1	0	0	0	0	1	32.625	0.375	33	5	1	6	9	1	10	4.25	0	0	0	5	3	2	0.285714286	2	3	1	avoided	0	0	0	0	0
2014_11	2014_11_04	2014_11_04_2_1	FE	F	E	38	30	85	NA	0.789473684	NA	2	0	1	1	1	0	1	0	0	0	0	1	32.625	0.375	33	5	1	6	9	1	10	4.25	0	0	0	5	3	2	0.285714286	2	3	1	grazed	0	0	0	0	0
2014_11	2014_11_04	2014_11_04_2_2	FE	F	E	38	30	85	NA	0.789473684	NA	2	0	1	1	1	0	1	0	0	0	0	1	32.625	0.375	33	5	1	6	9	1	10	4.25	0	0	0	5	3	2	0.285714286	2	3	1	avoided	0	0	0	0	0
2014_11	2014_11_04	2014_11_04_3_1	FE	F	E	38	30	85	NA	0.789473684	NA	2	0	1	1	1	0	1	0	0	0	0	1	32.625	0.375	33	5	1	6	9	1	10	4.25	0	0	0	5	3	2	0.285714286	2	3	1	grazed	0	0	0	0	0
2014_11	2014_11_04	2014_11_04_3_2	FE	F	E	38	30	85	NA	0.789473684	NA	2	0	1	1	1	0	1	0	0	0	0	1	32.625	0.375	33	5	1	6	9	1	10	4.25	0	0	0	5	3	2	0.285714286	2	3	1	avoided	0	0	0	0	0
2014_11	2014_11_04	2014_11_04_4_1	FE	F	E	38	30	85	NA	0.789473684	NA	2	0	1	1	1	0	1	0	0	0	0	1	32.625	0.375	33	5	1	6	9	1	10	4.25	0	0	0	5	3	2	0.285714286	2	3	1	grazed	0	0	0	0	0
2014_11	2014_11_04	2014_11_04_4_2	FE	F	E	38	30	85	NA	0.789473684	NA	2	0	1	1	1	0	1	0	0	0	0	1	32.625	0.375	33	5	1	6	9	1	10	4.25	0	0	0	5	3	2	0.285714286	2	3	1	avoided	0	0	0	0	0
2014_12	2014_12_01	2014_12_01_1_1	P_WE	P	WE	81	65	39	66	0.802469136	0.814814815	2	0	1	0	1	0	1	0	0	0	0	0	11.875	3.125	15	11	2	13	21	2	23	9.25	1	2	3	6	4	2	0.631578947	2	5	6	grazed	1	0	0	0	0
2014_12	2014_12_01	2014_12_01_1_2	P_WE	P	WE	81	65	39	66	0.802469136	0.814814815	2	0	1	0	1	0	1	0	0	0	0	0	11.875	3.125	15	11	2	13	21	2	23	9.25	1	2	3	6	4	2	0.631578947	2	5	6	avoided	1	0	0	0	0
2014_12	2014_12_01	2014_12_01_2_1	P_WE	P	WE	81	65	39	66	0.802469136	0.814814815	2	0	1	0	1	0	1	0	0	0	0	0	11.875	3.125	15	11	2	13	21	2	23	9.25	1	2	3	6	4	2	0.631578947	2	5	6	grazed	0	0	0	0	0
2014_12	2014_12_01	2014_12_01_2_2	P_WE	P	WE	81	65	39	66	0.802469136	0.814814815	2	0	1	0	1	0	1	0	0	0	0	0	11.875	3.125	15	11	2	13	21	2	23	9.25	1	2	3	6	4	2	0.631578947	2	5	6	avoided	0	0	0	0	0
2014_12	2014_12_01	2014_12_01_3_1	P_WE	P	WE	81	65	39	66	0.802469136	0.814814815	2	0	1	0	1	0	1	0	0	0	0	0	11.875	3.125	15	11	2	13	21	2	23	9.25	1	2	3	6	4	2	0.631578947	2	5	6	grazed	0	0	0	0	0
2014_12	2014_12_01	2014_12_01_3_2	P_WE	P	WE	81	65	39	66	0.802469136	0.814814815	2	0	1	0	1	0	1	0	0	0	0	0	11.875	3.125	15	11	2	13	21	2	23	9.25	1	2	3	6	4	2	0.631578947	2	5	6	avoided	0	0	0	0	0
2014_12	2014_12_01	2014_12_01_4_1	P_WE	P	WE	81	65	39	66	0.802469136	0.814814815	2	0	1	0	1	0	1	0	0	0	0	0	11.875	3.125	15	11	2	13	21	2	23	9.25	1	2	3	6	4	2	0.631578947	2	5	6	grazed	0	0	0	0	0
2014_12	2014_12_01	2014_12_01_4_2	P_WE	P	WE	81	65	39	66	0.802469136	0.814814815	2	0	1	0	1	0	1	0	0	0	0	0	11.875	3.125	15	11	2	13	21	2	23	9.25	1	2	3	6	4	2	0.631578947	2	5	6	avoided	1	0	0	0	0
2014_12	2014_12_02	2014_12_02_1_1	P_WE	P	WE	81	65	39	66	0.802469136	0.814814815	2	0	0	0	1	0	1	0	0	0	0	0	16.875	1.875	18.75	9	2	11	21	2	23	9.25	1	2	3	6	2	4	0.842105263	1	2	8	grazed	0	0	0	0	0
2014_12	2014_12_02	2014_12_02_1_2	P_WE	P	WE	81	65	39	66	0.802469136	0.814814815	2	0	0	0	1	0	1	0	0	0	0	0	16.875	1.875	18.75	9	2	11	21	2	23	9.25	1	2	3	6	2	4	0.842105263	1	2	8	avoided	0	0	0	0	0
2014_12	2014_12_02	2014_12_02_2_1	P_WE	P	WE	81	65	39	66	0.802469136	0.814814815	2	0	0	0	1	0	1	0	0	0	0	0	16.875	1.875	18.75	9	2	11	21	2	23	9.25	1	2	3	6	2	4	0.842105263	1	2	8	grazed	0	0	0	0	0
2014_12	2014_12_02	2014_12_02_2_2	P_WE	P	WE	81	65	39	66	0.802469136	0.814814815	2	0	0	0	1	0	1	0	0	0	0	0	16.875	1.875	18.75	9	2	11	21	2	23	9.25	1	2	3	6	2	4	0.842105263	1	2	8	avoided	0	0	0	0	0
2014_12	2014_12_02	2014_12_02_3_1	P_WE	P	WE	81	65	39	66	0.802469136	0.814814815	2	0	0	0	1	0	1	0	0	0	0	0	16.875	1.875	18.75	9	2	11	21	2	23	9.25	1	2	3	6	2	4	0.842105263	1	2	8	grazed	1	0	0	0	0
2014_12	2014_12_02	2014_12_02_3_2	P_WE	P	WE	81	65	39	66	0.802469136	0.814814815	2	0	0	0	1	0	1	0	0	0	0	0	16.875	1.875	18.75	9	2	11	21	2	23	9.25	1	2	3	6	2	4	0.842105263	1	2	8	avoided	1	0	0	0	0
2014_12	2014_12_02	2014_12_02_4_1	P_WE	P	WE	81	65	39	66	0.802469136	0.814814815	2	0	0	0	1	0	1	0	0	0	0	0	16.875	1.875	18.75	9	2	11	21	2	23	9.25	1	2	3	6	2	4	0.842105263	1	2	8	grazed	1	0	0	0	0
2014_12	2014_12_02	2014_12_02_4_2	P_WE	P	WE	81	65	39	66	0.802469136	0.814814815	2	0	0	0	1	0	1	0	0	0	0	0	16.875	1.875	18.75	9	2	11	21	2	23	9.25	1	2	3	6	2	4	0.842105263	1	2	8	avoided	0	0	0	0	0
2014_12	2014_12_03	2014_12_03_1_1	P_WE	P	WE	81	65	39	66	0.802469136	0.814814815	2	0	1	0	1	0	1	0	0	0	0	0	19.125	5.875	25	13	2	15	21	2	23	9.25	1	2	3	6	3	3	0.571428571	1	8	6	grazed	0	0	0	0	0
2014_12	2014_12_03	2014_12_03_1_2	P_WE	P	WE	81	65	39	66	0.802469136	0.814814815	2	0	1	0	1	0	1	0	0	0	0	0	19.125	5.875	25	13	2	15	21	2	23	9.25	1	2	3	6	3	3	0.571428571	1	8	6	avoided	0	0	0	0	0
2014_12	2014_12_03	2014_12_03_2_1	P_WE	P	WE	81	65	39	66	0.802469136	0.814814815	2	0	1	0	1	0	1	0	0	0	0	0	19.125	5.875	25	13	2	15	21	2	23	9.25	1	2	3	6	3	3	0.571428571	1	8	6	grazed	1	0	0	0	0
2014_12	2014_12_03	2014_12_03_2_2	P_WE	P	WE	81	65	39	66	0.802469136	0.814814815	2	0	1	0	1	0	1	0	0	0	0	0	19.125	5.875	25	13	2	15	21	2	23	9.25	1	2	3	6	3	3	0.571428571	1	8	6	avoided	0	0	0	0	0
2014_12	2014_12_03	2014_12_03_3_1	P_WE	P	WE	81	65	39	66	0.802469136	0.814814815	2	0	1	0	1	0	1	0	0	0	0	0	19.125	5.875	25	13	2	15	21	2	23	9.25	1	2	3	6	3	3	0.571428571	1	8	6	grazed	0	0	0	0	0
2014_12	2014_12_03	2014_12_03_3_2	P_WE	P	WE	81	65	39	66	0.802469136	0.814814815	2	0	1	0	1	0	1	0	0	0	0	0	19.125	5.875	25	13	2	15	21	2	23	9.25	1	2	3	6	3	3	0.571428571	1	8	6	avoided	0	0	0	0	0
2014_12	2014_12_03	2014_12_03_4_1	P_WE	P	WE	81	65	39	66	0.802469136	0.814814815	2	0	1	0	1	0	1	0	0	0	0	0	19.125	5.875	25	13	2	15	21	2	23	9.25	1	2	3	6	3	3	0.571428571	1	8	6	grazed	0	0	0	0	0
2014_12	2014_12_03	2014_12_03_4_2	P_WE	P	WE	81	65	39	66	0.802469136	0.814814815	2	0	1	0	1	0	1	0	0	0	0	0	19.125	5.875	25	13	2	15	21	2	23	9.25	1	2	3	6	3	3	0.571428571	1	8	6	avoided	1	0	0	0	0
2014_12	2014_12_04	2014_12_04_1_1	P_WE	P	WE	81	65	39	66	0.802469136	0.814814815	2	0	1	0	1	0	1	0	0	0	0	0	18.125	3.125	21.25	14	2	16	21	2	23	9.25	3	0	3	6	5	1	0.72	1	6	9	grazed	1	0	0	0	0
2014_12	2014_12_04	2014_12_04_1_2	P_WE	P	WE	81	65	39	66	0.802469136	0.814814815	2	0	1	0	1	0	1	0	0	0	0	0	18.125	3.125	21.25	14	2	16	21	2	23	9.25	3	0	3	6	5	1	0.72	1	6	9	avoided	1	0	0	0	0
2014_12	2014_12_04	2014_12_04_2_1	P_WE	P	WE	81	65	39	66	0.802469136	0.814814815	2	0	1	0	1	0	1	0	0	0	0	0	18.125	3.125	21.25	14	2	16	21	2	23	9.25	3	0	3	6	5	1	0.72	1	6	9	grazed	0	0	0	0	0
2014_12	2014_12_04	2014_12_04_2_2	P_WE	P	WE	81	65	39	66	0.802469136	0.814814815	2	0	1	0	1	0	1	0	0	0	0	0	18.125	3.125	21.25	14	2	16	21	2	23	9.25	3	0	3	6	5	1	0.72	1	6	9	avoided	1	0	0	0	0
2014_12	2014_12_04	2014_12_04_3_1	P_WE	P	WE	81	65	39	66	0.802469136	0.814814815	2	0	1	0	1	0	1	0	0	0	0	0	18.125	3.125	21.25	14	2	16	21	2	23	9.25	3	0	3	6	5	1	0.72	1	6	9	grazed	1	0	0	0	0
2014_12	2014_12_04	2014_12_04_3_2	P_WE	P	WE	81	65	39	66	0.802469136	0.814814815	2	0	1	0	1	0	1	0	0	0	0	0	18.125	3.125	21.25	14	2	16	21	2	23	9.25	3	0	3	6	5	1	0.72	1	6	9	avoided	1	0	0	0	0
2014_12	2014_12_04	2014_12_04_4_1	P_WE	P	WE	81	65	39	66	0.802469136	0.814814815	2	0	1	0	1	0	1	0	0	0	0	0	18.125	3.125	21.25	14	2	16	21	2	23	9.25	3	0	3	6	5	1	0.72	1	6	9	grazed	1	0	0	0	0
2014_12	2014_12_04	2014_12_04_4_2	P_WE	P	WE	81	65	39	66	0.802469136	0.814814815	2	0	1	0	1	0	1	0	0	0	0	0	18.125	3.125	21.25	14	2	16	21	2	23	9.25	3	0	3	6	5	1	0.72	1	6	9	avoided	0	0	0	0	0
NA	2014_13_01	2014_13_01_1_1	NA	NA	NA	NA	NA	NA	NA	NA	NA	NA	NA	NA	NA	NA	NA	NA	NA	NA	NA	NA	NA	NA	NA	NA	NA	NA	NA	NA	NA	NA	NA	NA	NA	NA	NA	NA	NA	NA	NA	NA	NA	grazed	0	0	0	0	0
NA	2014_13_01	2014_13_01_1_2	NA	NA	NA	NA	NA	NA	NA	NA	NA	NA	NA	NA	NA	NA	NA	NA	NA	NA	NA	NA	NA	NA	NA	NA	NA	NA	NA	NA	NA	NA	NA	NA	NA	NA	NA	NA	NA	NA	NA	NA	NA	avoided	1	0	0	0	0
NA	2014_13_01	2014_13_01_2_1	NA	NA	NA	NA	NA	NA	NA	NA	NA	NA	NA	NA	NA	NA	NA	NA	NA	NA	NA	NA	NA	NA	NA	NA	NA	NA	NA	NA	NA	NA	NA	NA	NA	NA	NA	NA	NA	NA	NA	NA	NA	grazed	0	0	0	0	0
NA	2014_13_01	2014_13_01_2_2	NA	NA	NA	NA	NA	NA	NA	NA	NA	NA	NA	NA	NA	NA	NA	NA	NA	NA	NA	NA	NA	NA	NA	NA	NA	NA	NA	NA	NA	NA	NA	NA	NA	NA	NA	NA	NA	NA	NA	NA	NA	avoided	1	0	0	0	0
NA	2014_13_01	2014_13_01_3_1	NA	NA	NA	NA	NA	NA	NA	NA	NA	NA	NA	NA	NA	NA	NA	NA	NA	NA	NA	NA	NA	NA	NA	NA	NA	NA	NA	NA	NA	NA	NA	NA	NA	NA	NA	NA	NA	NA	NA	NA	NA	grazed	0	0	0	0	0
NA	2014_13_01	2014_13_01_3_2	NA	NA	NA	NA	NA	NA	NA	NA	NA	NA	NA	NA	NA	NA	NA	NA	NA	NA	NA	NA	NA	NA	NA	NA	NA	NA	NA	NA	NA	NA	NA	NA	NA	NA	NA	NA	NA	NA	NA	NA	NA	avoided	0	0	0	0	0
NA	2014_13_01	2014_13_01_4_1	NA	NA	NA	NA	NA	NA	NA	NA	NA	NA	NA	NA	NA	NA	NA	NA	NA	NA	NA	NA	NA	NA	NA	NA	NA	NA	NA	NA	NA	NA	NA	NA	NA	NA	NA	NA	NA	NA	NA	NA	NA	grazed	0	0	0	0	0
NA	2014_13_01	2014_13_01_4_2	NA	NA	NA	NA	NA	NA	NA	NA	NA	NA	NA	NA	NA	NA	NA	NA	NA	NA	NA	NA	NA	NA	NA	NA	NA	NA	NA	NA	NA	NA	NA	NA	NA	NA	NA	NA	NA	NA	NA	NA	NA	avoided	0	0	0	0	0
NA	2014_13_02	2014_13_02_1_1	NA	NA	NA	NA	NA	NA	NA	NA	NA	NA	NA	NA	NA	NA	NA	NA	NA	NA	NA	NA	NA	NA	NA	NA	NA	NA	NA	NA	NA	NA	NA	NA	NA	NA	NA	NA	NA	NA	NA	NA	NA	grazed	0	0	0	0	0
NA	2014_13_02	2014_13_02_1_2	NA	NA	NA	NA	NA	NA	NA	NA	NA	NA	NA	NA	NA	NA	NA	NA	NA	NA	NA	NA	NA	NA	NA	NA	NA	NA	NA	NA	NA	NA	NA	NA	NA	NA	NA	NA	NA	NA	NA	NA	NA	avoided	0	0	0	0	0
NA	2014_13_02	2014_13_02_2_1	NA	NA	NA	NA	NA	NA	NA	NA	NA	NA	NA	NA	NA	NA	NA	NA	NA	NA	NA	NA	NA	NA	NA	NA	NA	NA	NA	NA	NA	NA	NA	NA	NA	NA	NA	NA	NA	NA	NA	NA	NA	grazed	0	0	0	0	0
NA	2014_13_02	2014_13_02_2_2	NA	NA	NA	NA	NA	NA	NA	NA	NA	NA	NA	NA	NA	NA	NA	NA	NA	NA	NA	NA	NA	NA	NA	NA	NA	NA	NA	NA	NA	NA	NA	NA	NA	NA	NA	NA	NA	NA	NA	NA	NA	avoided	0	0	0	0	0
NA	2014_13_02	2014_13_02_3_1	NA	NA	NA	NA	NA	NA	NA	NA	NA	NA	NA	NA	NA	NA	NA	NA	NA	NA	NA	NA	NA	NA	NA	NA	NA	NA	NA	NA	NA	NA	NA	NA	NA	NA	NA	NA	NA	NA	NA	NA	NA	grazed	0	0	0	0	0
NA	2014_13_02	2014_13_02_3_2	NA	NA	NA	NA	NA	NA	NA	NA	NA	NA	NA	NA	NA	NA	NA	NA	NA	NA	NA	NA	NA	NA	NA	NA	NA	NA	NA	NA	NA	NA	NA	NA	NA	NA	NA	NA	NA	NA	NA	NA	NA	avoided	0	0	0	0	0
NA	2014_13_02	2014_13_02_4_1	NA	NA	NA	NA	NA	NA	NA	NA	NA	NA	NA	NA	NA	NA	NA	NA	NA	NA	NA	NA	NA	NA	NA	NA	NA	NA	NA	NA	NA	NA	NA	NA	NA	NA	NA	NA	NA	NA	NA	NA	NA	grazed	0	0	0	0	0
NA	2014_13_02	2014_13_02_4_2	NA	NA	NA	NA	NA	NA	NA	NA	NA	NA	NA	NA	NA	NA	NA	NA	NA	NA	NA	NA	NA	NA	NA	NA	NA	NA	NA	NA	NA	NA	NA	NA	NA	NA	NA	NA	NA	NA	NA	NA	NA	avoided	0	0	0	0	0
NA	2014_13_03	2014_13_03_1_1	NA	NA	NA	NA	NA	NA	NA	NA	NA	NA	NA	NA	NA	NA	NA	NA	NA	NA	NA	NA	NA	NA	NA	NA	NA	NA	NA	NA	NA	NA	NA	NA	NA	NA	NA	NA	NA	NA	NA	NA	NA	grazed	0	0	0	0	0
NA	2014_13_03	2014_13_03_1_2	NA	NA	NA	NA	NA	NA	NA	NA	NA	NA	NA	NA	NA	NA	NA	NA	NA	NA	NA	NA	NA	NA	NA	NA	NA	NA	NA	NA	NA	NA	NA	NA	NA	NA	NA	NA	NA	NA	NA	NA	NA	avoided	0	0	0	0	0
NA	2014_13_03	2014_13_03_2_1	NA	NA	NA	NA	NA	NA	NA	NA	NA	NA	NA	NA	NA	NA	NA	NA	NA	NA	NA	NA	NA	NA	NA	NA	NA	NA	NA	NA	NA	NA	NA	NA	NA	NA	NA	NA	NA	NA	NA	NA	NA	grazed	0	0	0	0	0
NA	2014_13_03	2014_13_03_2_2	NA	NA	NA	NA	NA	NA	NA	NA	NA	NA	NA	NA	NA	NA	NA	NA	NA	NA	NA	NA	NA	NA	NA	NA	NA	NA	NA	NA	NA	NA	NA	NA	NA	NA	NA	NA	NA	NA	NA	NA	NA	avoided	0	0	0	0	0
NA	2014_13_03	2014_13_03_3_1	NA	NA	NA	NA	NA	NA	NA	NA	NA	NA	NA	NA	NA	NA	NA	NA	NA	NA	NA	NA	NA	NA	NA	NA	NA	NA	NA	NA	NA	NA	NA	NA	NA	NA	NA	NA	NA	NA	NA	NA	NA	grazed	0	0	0	0	0
NA	2014_13_03	2014_13_03_3_2	NA	NA	NA	NA	NA	NA	NA	NA	NA	NA	NA	NA	NA	NA	NA	NA	NA	NA	NA	NA	NA	NA	NA	NA	NA	NA	NA	NA	NA	NA	NA	NA	NA	NA	NA	NA	NA	NA	NA	NA	NA	avoided	0	0	0	0	0
NA	2014_13_03	2014_13_03_4_1	NA	NA	NA	NA	NA	NA	NA	NA	NA	NA	NA	NA	NA	NA	NA	NA	NA	NA	NA	NA	NA	NA	NA	NA	NA	NA	NA	NA	NA	NA	NA	NA	NA	NA	NA	NA	NA	NA	NA	NA	NA	grazed	0	0	0	0	0
NA	2014_13_03	2014_13_03_4_2	NA	NA	NA	NA	NA	NA	NA	NA	NA	NA	NA	NA	NA	NA	NA	NA	NA	NA	NA	NA	NA	NA	NA	NA	NA	NA	NA	NA	NA	NA	NA	NA	NA	NA	NA	NA	NA	NA	NA	NA	NA	avoided	0	0	0	0	0
NA	2014_13_04	2014_13_04_1_1	NA	NA	NA	NA	NA	NA	NA	NA	NA	NA	NA	NA	NA	NA	NA	NA	NA	NA	NA	NA	NA	NA	NA	NA	NA	NA	NA	NA	NA	NA	NA	NA	NA	NA	NA	NA	NA	NA	NA	NA	NA	grazed	0	0	0	0	0
NA	2014_13_04	2014_13_04_1_2	NA	NA	NA	NA	NA	NA	NA	NA	NA	NA	NA	NA	NA	NA	NA	NA	NA	NA	NA	NA	NA	NA	NA	NA	NA	NA	NA	NA	NA	NA	NA	NA	NA	NA	NA	NA	NA	NA	NA	NA	NA	avoided	0	0	0	0	0
NA	2014_13_04	2014_13_04_2_1	NA	NA	NA	NA	NA	NA	NA	NA	NA	NA	NA	NA	NA	NA	NA	NA	NA	NA	NA	NA	NA	NA	NA	NA	NA	NA	NA	NA	NA	NA	NA	NA	NA	NA	NA	NA	NA	NA	NA	NA	NA	grazed	0	0	0	0	0
NA	2014_13_04	2014_13_04_2_2	NA	NA	NA	NA	NA	NA	NA	NA	NA	NA	NA	NA	NA	NA	NA	NA	NA	NA	NA	NA	NA	NA	NA	NA	NA	NA	NA	NA	NA	NA	NA	NA	NA	NA	NA	NA	NA	NA	NA	NA	NA	avoided	0	0	0	0	0
NA	2014_13_04	2014_13_04_3_1	NA	NA	NA	NA	NA	NA	NA	NA	NA	NA	NA	NA	NA	NA	NA	NA	NA	NA	NA	NA	NA	NA	NA	NA	NA	NA	NA	NA	NA	NA	NA	NA	NA	NA	NA	NA	NA	NA	NA	NA	NA	grazed	0	0	0	0	0
NA	2014_13_04	2014_13_04_3_2	NA	NA	NA	NA	NA	NA	NA	NA	NA	NA	NA	NA	NA	NA	NA	NA	NA	NA	NA	NA	NA	NA	NA	NA	NA	NA	NA	NA	NA	NA	NA	NA	NA	NA	NA	NA	NA	NA	NA	NA	NA	avoided	0	0	0	0	0
NA	2014_13_04	2014_13_04_4_1	NA	NA	NA	NA	NA	NA	NA	NA	NA	NA	NA	NA	NA	NA	NA	NA	NA	NA	NA	NA	NA	NA	NA	NA	NA	NA	NA	NA	NA	NA	NA	NA	NA	NA	NA	NA	NA	NA	NA	NA	NA	grazed	0	0	0	0	0
NA	2014_13_04	2014_13_04_4_2	NA	NA	NA	NA	NA	NA	NA	NA	NA	NA	NA	NA	NA	NA	NA	NA	NA	NA	NA	NA	NA	NA	NA	NA	NA	NA	NA	NA	NA	NA	NA	NA	NA	NA	NA	NA	NA	NA	NA	NA	NA	avoided	0	0	0	0	0
2014_14	2014_14_01	2014_14_01_1_1	PE	P	E	10.5	1.5	15	1.5	0.142857143	0.142857143	0.33	NA	0	1	0	0	0	1	0	0	0	0	13.875	8.75	22.625	5	1	6	8	1	9	4.25	0	1	1	4	2	2	0.666666667	1	2	3	grazed	0	0	0	0	0
2014_14	2014_14_01	2014_14_01_1_2	PE	P	E	10.5	1.5	15	1.5	0.142857143	0.142857143	0.33	NA	0	1	0	0	0	1	0	0	0	0	13.875	8.75	22.625	5	1	6	8	1	9	4.25	0	1	1	4	2	2	0.666666667	1	2	3	avoided	0	0	0	0	0
2014_14	2014_14_01	2014_14_01_2_1	PE	P	E	10.5	1.5	15	1.5	0.142857143	0.142857143	0.33	NA	0	1	0	0	0	1	0	0	0	0	13.875	8.75	22.625	5	1	6	8	1	9	4.25	0	1	1	4	2	2	0.666666667	1	2	3	grazed	0	0	0	0	0
2014_14	2014_14_01	2014_14_01_2_2	PE	P	E	10.5	1.5	15	1.5	0.142857143	0.142857143	0.33	NA	0	1	0	0	0	1	0	0	0	0	13.875	8.75	22.625	5	1	6	8	1	9	4.25	0	1	1	4	2	2	0.666666667	1	2	3	avoided	0	0	0	0	0
2014_14	2014_14_01	2014_14_01_3_1	PE	P	E	10.5	1.5	15	1.5	0.142857143	0.142857143	0.33	NA	0	1	0	0	0	1	0	0	0	0	13.875	8.75	22.625	5	1	6	8	1	9	4.25	0	1	1	4	2	2	0.666666667	1	2	3	grazed	0	0	0	0	0
2014_14	2014_14_01	2014_14_01_3_2	PE	P	E	10.5	1.5	15	1.5	0.142857143	0.142857143	0.33	NA	0	1	0	0	0	1	0	0	0	0	13.875	8.75	22.625	5	1	6	8	1	9	4.25	0	1	1	4	2	2	0.666666667	1	2	3	avoided	0	0	0	0	0
2014_14	2014_14_01	2014_14_01_4_1	PE	P	E	10.5	1.5	15	1.5	0.142857143	0.142857143	0.33	NA	0	1	0	0	0	1	0	0	0	0	13.875	8.75	22.625	5	1	6	8	1	9	4.25	0	1	1	4	2	2	0.666666667	1	2	3	grazed	0	0	0	0	0
2014_14	2014_14_01	2014_14_01_4_2	PE	P	E	10.5	1.5	15	1.5	0.142857143	0.142857143	0.33	NA	0	1	0	0	0	1	0	0	0	0	13.875	8.75	22.625	5	1	6	8	1	9	4.25	0	1	1	4	2	2	0.666666667	1	2	3	avoided	0	0	0	0	0
2014_14	2014_14_02	2014_14_02_1_1	PE	P	E	10.5	1.5	15	1.5	0.142857143	0.142857143	0.33	NA	0	1	0	0	0	1	0	0	0	0	39.375	0.125	39.5	7	1	8	8	1	9	4.25	1	0	1	4	4	0	0.666666667	2	2	4	grazed	0	0	0	0	0
2014_14	2014_14_02	2014_14_02_1_2	PE	P	E	10.5	1.5	15	1.5	0.142857143	0.142857143	0.33	NA	0	1	0	0	0	1	0	0	0	0	39.375	0.125	39.5	7	1	8	8	1	9	4.25	1	0	1	4	4	0	0.666666667	2	2	4	avoided	0	0	0	0	0
2014_14	2014_14_02	2014_14_02_2_1	PE	P	E	10.5	1.5	15	1.5	0.142857143	0.142857143	0.33	NA	0	1	0	0	0	1	0	0	0	0	39.375	0.125	39.5	7	1	8	8	1	9	4.25	1	0	1	4	4	0	0.666666667	2	2	4	grazed	0	0	0	0	0
2014_14	2014_14_02	2014_14_02_2_2	PE	P	E	10.5	1.5	15	1.5	0.142857143	0.142857143	0.33	NA	0	1	0	0	0	1	0	0	0	0	39.375	0.125	39.5	7	1	8	8	1	9	4.25	1	0	1	4	4	0	0.666666667	2	2	4	avoided	0	0	0	0	0
2014_14	2014_14_02	2014_14_02_3_1	PE	P	E	10.5	1.5	15	1.5	0.142857143	0.142857143	0.33	NA	0	1	0	0	0	1	0	0	0	0	39.375	0.125	39.5	7	1	8	8	1	9	4.25	1	0	1	4	4	0	0.666666667	2	2	4	grazed	0	0	0	0	0
2014_14	2014_14_02	2014_14_02_3_2	PE	P	E	10.5	1.5	15	1.5	0.142857143	0.142857143	0.33	NA	0	1	0	0	0	1	0	0	0	0	39.375	0.125	39.5	7	1	8	8	1	9	4.25	1	0	1	4	4	0	0.666666667	2	2	4	avoided	0	0	0	0	0
2014_14	2014_14_02	2014_14_02_4_1	PE	P	E	10.5	1.5	15	1.5	0.142857143	0.142857143	0.33	NA	0	1	0	0	0	1	0	0	0	0	39.375	0.125	39.5	7	1	8	8	1	9	4.25	1	0	1	4	4	0	0.666666667	2	2	4	grazed	0	0	0	0	0
2014_14	2014_14_02	2014_14_02_4_2	PE	P	E	10.5	1.5	15	1.5	0.142857143	0.142857143	0.33	NA	0	1	0	0	0	1	0	0	0	0	39.375	0.125	39.5	7	1	8	8	1	9	4.25	1	0	1	4	4	0	0.666666667	2	2	4	avoided	0	0	0	0	0
NA	2014_14_03	2014_14_03_1_1	NA	NA	NA	NA	NA	NA	NA	NA	NA	NA	NA	NA	NA	NA	NA	NA	NA	NA	NA	NA	NA	NA	NA	NA	NA	NA	NA	NA	NA	NA	NA	NA	NA	NA	NA	NA	NA	NA	NA	NA	NA	grazed	0	0	0	0	0
NA	2014_14_03	2014_14_03_1_2	NA	NA	NA	NA	NA	NA	NA	NA	NA	NA	NA	NA	NA	NA	NA	NA	NA	NA	NA	NA	NA	NA	NA	NA	NA	NA	NA	NA	NA	NA	NA	NA	NA	NA	NA	NA	NA	NA	NA	NA	NA	avoided	0	0	0	0	0
NA	2014_14_03	2014_14_03_2_1	NA	NA	NA	NA	NA	NA	NA	NA	NA	NA	NA	NA	NA	NA	NA	NA	NA	NA	NA	NA	NA	NA	NA	NA	NA	NA	NA	NA	NA	NA	NA	NA	NA	NA	NA	NA	NA	NA	NA	NA	NA	grazed	0	0	0	0	0
NA	2014_14_03	2014_14_03_2_2	NA	NA	NA	NA	NA	NA	NA	NA	NA	NA	NA	NA	NA	NA	NA	NA	NA	NA	NA	NA	NA	NA	NA	NA	NA	NA	NA	NA	NA	NA	NA	NA	NA	NA	NA	NA	NA	NA	NA	NA	NA	avoided	0	0	0	0	0
NA	2014_14_03	2014_14_03_3_1	NA	NA	NA	NA	NA	NA	NA	NA	NA	NA	NA	NA	NA	NA	NA	NA	NA	NA	NA	NA	NA	NA	NA	NA	NA	NA	NA	NA	NA	NA	NA	NA	NA	NA	NA	NA	NA	NA	NA	NA	NA	grazed	0	0	0	0	0
NA	2014_14_03	2014_14_03_3_2	NA	NA	NA	NA	NA	NA	NA	NA	NA	NA	NA	NA	NA	NA	NA	NA	NA	NA	NA	NA	NA	NA	NA	NA	NA	NA	NA	NA	NA	NA	NA	NA	NA	NA	NA	NA	NA	NA	NA	NA	NA	avoided	0	0	0	0	0
NA	2014_14_03	2014_14_03_4_1	NA	NA	NA	NA	NA	NA	NA	NA	NA	NA	NA	NA	NA	NA	NA	NA	NA	NA	NA	NA	NA	NA	NA	NA	NA	NA	NA	NA	NA	NA	NA	NA	NA	NA	NA	NA	NA	NA	NA	NA	NA	grazed	0	0	0	0	0
NA	2014_14_03	2014_14_03_4_2	NA	NA	NA	NA	NA	NA	NA	NA	NA	NA	NA	NA	NA	NA	NA	NA	NA	NA	NA	NA	NA	NA	NA	NA	NA	NA	NA	NA	NA	NA	NA	NA	NA	NA	NA	NA	NA	NA	NA	NA	NA	avoided	0	0	0	0	0
NA	2014_14_04	2014_14_04_1_1	NA	NA	NA	NA	NA	NA	NA	NA	NA	NA	NA	NA	NA	NA	NA	NA	NA	NA	NA	NA	NA	NA	NA	NA	NA	NA	NA	NA	NA	NA	NA	NA	NA	NA	NA	NA	NA	NA	NA	NA	NA	grazed	0	0	0	0	0
NA	2014_14_04	2014_14_04_1_2	NA	NA	NA	NA	NA	NA	NA	NA	NA	NA	NA	NA	NA	NA	NA	NA	NA	NA	NA	NA	NA	NA	NA	NA	NA	NA	NA	NA	NA	NA	NA	NA	NA	NA	NA	NA	NA	NA	NA	NA	NA	avoided	0	0	0	0	0
NA	2014_14_04	2014_14_04_2_1	NA	NA	NA	NA	NA	NA	NA	NA	NA	NA	NA	NA	NA	NA	NA	NA	NA	NA	NA	NA	NA	NA	NA	NA	NA	NA	NA	NA	NA	NA	NA	NA	NA	NA	NA	NA	NA	NA	NA	NA	NA	grazed	0	0	0	0	0
NA	2014_14_04	2014_14_04_2_2	NA	NA	NA	NA	NA	NA	NA	NA	NA	NA	NA	NA	NA	NA	NA	NA	NA	NA	NA	NA	NA	NA	NA	NA	NA	NA	NA	NA	NA	NA	NA	NA	NA	NA	NA	NA	NA	NA	NA	NA	NA	avoided	0	0	0	0	0
NA	2014_14_04	2014_14_04_3_1	NA	NA	NA	NA	NA	NA	NA	NA	NA	NA	NA	NA	NA	NA	NA	NA	NA	NA	NA	NA	NA	NA	NA	NA	NA	NA	NA	NA	NA	NA	NA	NA	NA	NA	NA	NA	NA	NA	NA	NA	NA	grazed	0	0	0	0	0
NA	2014_14_04	2014_14_04_3_2	NA	NA	NA	NA	NA	NA	NA	NA	NA	NA	NA	NA	NA	NA	NA	NA	NA	NA	NA	NA	NA	NA	NA	NA	NA	NA	NA	NA	NA	NA	NA	NA	NA	NA	NA	NA	NA	NA	NA	NA	NA	avoided	0	0	0	0	0
NA	2014_14_04	2014_14_04_4_1	NA	NA	NA	NA	NA	NA	NA	NA	NA	NA	NA	NA	NA	NA	NA	NA	NA	NA	NA	NA	NA	NA	NA	NA	NA	NA	NA	NA	NA	NA	NA	NA	NA	NA	NA	NA	NA	NA	NA	NA	NA	grazed	0	0	0	0	0
NA	2014_14_04	2014_14_04_4_2	NA	NA	NA	NA	NA	NA	NA	NA	NA	NA	NA	NA	NA	NA	NA	NA	NA	NA	NA	NA	NA	NA	NA	NA	NA	NA	NA	NA	NA	NA	NA	NA	NA	NA	NA	NA	NA	NA	NA	NA	NA	avoided	0	0	0	0	0
2014_15	2014_15_01	2014_15_01_1_1	FE	F	E	230	180	200	115	0.782608696	0.5	6	0	1	0	1	1	1	0	0	0	1	0	22.875	23.375	46.25	11	2	13	14	2	16	6.25	0	0	0	7	6	1	0.555555556	4	4	5	grazed	1	0	0	0	0
2014_15	2014_15_01	2014_15_01_1_2	FE	F	E	230	180	200	115	0.782608696	0.5	6	0	1	0	1	1	1	0	0	0	1	0	22.875	23.375	46.25	11	2	13	14	2	16	6.25	0	0	0	7	6	1	0.555555556	4	4	5	avoided	0	0	0	0	0
2014_15	2014_15_01	2014_15_01_2_1	FE	F	E	230	180	200	115	0.782608696	0.5	6	0	1	0	1	1	1	0	0	0	1	0	22.875	23.375	46.25	11	2	13	14	2	16	6.25	0	0	0	7	6	1	0.555555556	4	4	5	grazed	0	0	0	0	0
2014_15	2014_15_01	2014_15_01_2_2	FE	F	E	230	180	200	115	0.782608696	0.5	6	0	1	0	1	1	1	0	0	0	1	0	22.875	23.375	46.25	11	2	13	14	2	16	6.25	0	0	0	7	6	1	0.555555556	4	4	5	avoided	0	0	0	0	0
2014_15	2014_15_01	2014_15_01_3_1	FE	F	E	230	180	200	115	0.782608696	0.5	6	0	1	0	1	1	1	0	0	0	1	0	22.875	23.375	46.25	11	2	13	14	2	16	6.25	0	0	0	7	6	1	0.555555556	4	4	5	grazed	0	0	0	0	0
2014_15	2014_15_01	2014_15_01_3_2	FE	F	E	230	180	200	115	0.782608696	0.5	6	0	1	0	1	1	1	0	0	0	1	0	22.875	23.375	46.25	11	2	13	14	2	16	6.25	0	0	0	7	6	1	0.555555556	4	4	5	avoided	0	0	0	0	0
2014_15	2014_15_01	2014_15_01_4_1	FE	F	E	230	180	200	115	0.782608696	0.5	6	0	1	0	1	1	1	0	0	0	1	0	22.875	23.375	46.25	11	2	13	14	2	16	6.25	0	0	0	7	6	1	0.555555556	4	4	5	grazed	0	0	0	0	0
2014_15	2014_15_01	2014_15_01_4_2	FE	F	E	230	180	200	115	0.782608696	0.5	6	0	1	0	1	1	1	0	0	0	1	0	22.875	23.375	46.25	11	2	13	14	2	16	6.25	0	0	0	7	6	1	0.555555556	4	4	5	avoided	0	0	0	0	0
2014_15	2014_15_02	2014_15_02_1_1	FE	F	E	230	180	200	115	0.782608696	0.5	6	0	1	0	1	1	1	0	0	0	1	0	40.625	17.5	58.125	11	1	12	14	2	16	6.25	0	0	0	7	5	2	0.666666667	1	5	6	grazed	0	0	0	0	0
2014_15	2014_15_02	2014_15_02_1_2	FE	F	E	230	180	200	115	0.782608696	0.5	6	0	1	0	1	1	1	0	0	0	1	0	40.625	17.5	58.125	11	1	12	14	2	16	6.25	0	0	0	7	5	2	0.666666667	1	5	6	avoided	1	0	0	0	0
2014_15	2014_15_02	2014_15_02_2_1	FE	F	E	230	180	200	115	0.782608696	0.5	6	0	1	0	1	1	1	0	0	0	1	0	40.625	17.5	58.125	11	1	12	14	2	16	6.25	0	0	0	7	5	2	0.666666667	1	5	6	grazed	1	0	0	0	0
2014_15	2014_15_02	2014_15_02_2_2	FE	F	E	230	180	200	115	0.782608696	0.5	6	0	1	0	1	1	1	0	0	0	1	0	40.625	17.5	58.125	11	1	12	14	2	16	6.25	0	0	0	7	5	2	0.666666667	1	5	6	avoided	1	0	0	0	0
2014_15	2014_15_02	2014_15_02_3_1	FE	F	E	230	180	200	115	0.782608696	0.5	6	0	1	0	1	1	1	0	0	0	1	0	40.625	17.5	58.125	11	1	12	14	2	16	6.25	0	0	0	7	5	2	0.666666667	1	5	6	grazed	1	0	0	0	0
2014_15	2014_15_02	2014_15_02_3_2	FE	F	E	230	180	200	115	0.782608696	0.5	6	0	1	0	1	1	1	0	0	0	1	0	40.625	17.5	58.125	11	1	12	14	2	16	6.25	0	0	0	7	5	2	0.666666667	1	5	6	avoided	1	0	0	0	0
2014_15	2014_15_02	2014_15_02_4_1	FE	F	E	230	180	200	115	0.782608696	0.5	6	0	1	0	1	1	1	0	0	0	1	0	40.625	17.5	58.125	11	1	12	14	2	16	6.25	0	0	0	7	5	2	0.666666667	1	5	6	grazed	0	0	0	0	0
2014_15	2014_15_02	2014_15_02_4_2	FE	F	E	230	180	200	115	0.782608696	0.5	6	0	1	0	1	1	1	0	0	0	1	0	40.625	17.5	58.125	11	1	12	14	2	16	6.25	0	0	0	7	5	2	0.666666667	1	5	6	avoided	1	0	0	0	0
NA	2014_15_03	2014_15_03_1_1	NA	NA	NA	NA	NA	NA	NA	NA	NA	NA	NA	NA	NA	NA	NA	NA	NA	NA	NA	NA	NA	NA	NA	NA	NA	NA	NA	NA	NA	NA	NA	NA	NA	NA	NA	NA	NA	NA	NA	NA	NA	grazed	0	0	0	0	0
NA	2014_15_03	2014_15_03_1_2	NA	NA	NA	NA	NA	NA	NA	NA	NA	NA	NA	NA	NA	NA	NA	NA	NA	NA	NA	NA	NA	NA	NA	NA	NA	NA	NA	NA	NA	NA	NA	NA	NA	NA	NA	NA	NA	NA	NA	NA	NA	avoided	1	0	0	0	0
NA	2014_15_03	2014_15_03_2_1	NA	NA	NA	NA	NA	NA	NA	NA	NA	NA	NA	NA	NA	NA	NA	NA	NA	NA	NA	NA	NA	NA	NA	NA	NA	NA	NA	NA	NA	NA	NA	NA	NA	NA	NA	NA	NA	NA	NA	NA	NA	grazed	0	0	0	0	0
NA	2014_15_03	2014_15_03_2_2	NA	NA	NA	NA	NA	NA	NA	NA	NA	NA	NA	NA	NA	NA	NA	NA	NA	NA	NA	NA	NA	NA	NA	NA	NA	NA	NA	NA	NA	NA	NA	NA	NA	NA	NA	NA	NA	NA	NA	NA	NA	avoided	0	0	0	0	0
NA	2014_15_03	2014_15_03_3_1	NA	NA	NA	NA	NA	NA	NA	NA	NA	NA	NA	NA	NA	NA	NA	NA	NA	NA	NA	NA	NA	NA	NA	NA	NA	NA	NA	NA	NA	NA	NA	NA	NA	NA	NA	NA	NA	NA	NA	NA	NA	grazed	0	0	0	0	0
NA	2014_15_03	2014_15_03_3_2	NA	NA	NA	NA	NA	NA	NA	NA	NA	NA	NA	NA	NA	NA	NA	NA	NA	NA	NA	NA	NA	NA	NA	NA	NA	NA	NA	NA	NA	NA	NA	NA	NA	NA	NA	NA	NA	NA	NA	NA	NA	avoided	1	0	0	0	0
NA	2014_15_03	2014_15_03_4_1	NA	NA	NA	NA	NA	NA	NA	NA	NA	NA	NA	NA	NA	NA	NA	NA	NA	NA	NA	NA	NA	NA	NA	NA	NA	NA	NA	NA	NA	NA	NA	NA	NA	NA	NA	NA	NA	NA	NA	NA	NA	grazed	1	0	0	0	0
NA	2014_15_03	2014_15_03_4_2	NA	NA	NA	NA	NA	NA	NA	NA	NA	NA	NA	NA	NA	NA	NA	NA	NA	NA	NA	NA	NA	NA	NA	NA	NA	NA	NA	NA	NA	NA	NA	NA	NA	NA	NA	NA	NA	NA	NA	NA	NA	avoided	0	0	0	0	0
NA	2014_15_04	2014_15_04_1_1	NA	NA	NA	NA	NA	NA	NA	NA	NA	NA	NA	NA	NA	NA	NA	NA	NA	NA	NA	NA	NA	NA	NA	NA	NA	NA	NA	NA	NA	NA	NA	NA	NA	NA	NA	NA	NA	NA	NA	NA	NA	grazed	0	0	0	0	0
NA	2014_15_04	2014_15_04_1_2	NA	NA	NA	NA	NA	NA	NA	NA	NA	NA	NA	NA	NA	NA	NA	NA	NA	NA	NA	NA	NA	NA	NA	NA	NA	NA	NA	NA	NA	NA	NA	NA	NA	NA	NA	NA	NA	NA	NA	NA	NA	avoided	0	0	0	0	0
NA	2014_15_04	2014_15_04_2_1	NA	NA	NA	NA	NA	NA	NA	NA	NA	NA	NA	NA	NA	NA	NA	NA	NA	NA	NA	NA	NA	NA	NA	NA	NA	NA	NA	NA	NA	NA	NA	NA	NA	NA	NA	NA	NA	NA	NA	NA	NA	grazed	0	0	0	0	0
NA	2014_15_04	2014_15_04_2_2	NA	NA	NA	NA	NA	NA	NA	NA	NA	NA	NA	NA	NA	NA	NA	NA	NA	NA	NA	NA	NA	NA	NA	NA	NA	NA	NA	NA	NA	NA	NA	NA	NA	NA	NA	NA	NA	NA	NA	NA	NA	avoided	0	0	0	0	0
NA	2014_15_04	2014_15_04_3_1	NA	NA	NA	NA	NA	NA	NA	NA	NA	NA	NA	NA	NA	NA	NA	NA	NA	NA	NA	NA	NA	NA	NA	NA	NA	NA	NA	NA	NA	NA	NA	NA	NA	NA	NA	NA	NA	NA	NA	NA	NA	grazed	0	0	0	0	0
NA	2014_15_04	2014_15_04_3_2	NA	NA	NA	NA	NA	NA	NA	NA	NA	NA	NA	NA	NA	NA	NA	NA	NA	NA	NA	NA	NA	NA	NA	NA	NA	NA	NA	NA	NA	NA	NA	NA	NA	NA	NA	NA	NA	NA	NA	NA	NA	avoided	0	0	0	0	0
NA	2014_15_04	2014_15_04_4_1	NA	NA	NA	NA	NA	NA	NA	NA	NA	NA	NA	NA	NA	NA	NA	NA	NA	NA	NA	NA	NA	NA	NA	NA	NA	NA	NA	NA	NA	NA	NA	NA	NA	NA	NA	NA	NA	NA	NA	NA	NA	grazed	1	0	0	0	0
NA	2014_15_04	2014_15_04_4_2	NA	NA	NA	NA	NA	NA	NA	NA	NA	NA	NA	NA	NA	NA	NA	NA	NA	NA	NA	NA	NA	NA	NA	NA	NA	NA	NA	NA	NA	NA	NA	NA	NA	NA	NA	NA	NA	NA	NA	NA	NA	avoided	0	0	0	0	0
2014_16	2014_16_01	2014_16_01_1_1	FE	F	E	94	2	8.2	1.8	0.021276596	0.019148936	1.5	20	0	1	1	0	1	0	0	1	1	0	10	0	10	8	0	8	13	1	14	9	1	1	2	5	2	3	0.545454545	4	1	3	grazed	0	0	0	0	0
2014_16	2014_16_01	2014_16_01_1_2	FE	F	E	94	2	8.2	1.8	0.021276596	0.019148936	1.5	20	0	1	1	0	1	0	0	1	1	0	10	0	10	8	0	8	13	1	14	9	1	1	2	5	2	3	0.545454545	4	1	3	avoided	0	0	0	0	0
2014_16	2014_16_01	2014_16_01_2_1	FE	F	E	94	2	8.2	1.8	0.021276596	0.019148936	1.5	20	0	1	1	0	1	0	0	1	1	0	10	0	10	8	0	8	13	1	14	9	1	1	2	5	2	3	0.545454545	4	1	3	grazed	0	0	0	0	0
2014_16	2014_16_01	2014_16_01_2_2	FE	F	E	94	2	8.2	1.8	0.021276596	0.019148936	1.5	20	0	1	1	0	1	0	0	1	1	0	10	0	10	8	0	8	13	1	14	9	1	1	2	5	2	3	0.545454545	4	1	3	avoided	0	0	0	0	0
2014_16	2014_16_01	2014_16_01_3_1	FE	F	E	94	2	8.2	1.8	0.021276596	0.019148936	1.5	20	0	1	1	0	1	0	0	1	1	0	10	0	10	8	0	8	13	1	14	9	1	1	2	5	2	3	0.545454545	4	1	3	grazed	0	0	0	0	0
2014_16	2014_16_01	2014_16_01_3_2	FE	F	E	94	2	8.2	1.8	0.021276596	0.019148936	1.5	20	0	1	1	0	1	0	0	1	1	0	10	0	10	8	0	8	13	1	14	9	1	1	2	5	2	3	0.545454545	4	1	3	avoided	0	0	0	0	0
2014_16	2014_16_01	2014_16_01_4_1	FE	F	E	94	2	8.2	1.8	0.021276596	0.019148936	1.5	20	0	1	1	0	1	0	0	1	1	0	10	0	10	8	0	8	13	1	14	9	1	1	2	5	2	3	0.545454545	4	1	3	grazed	0	0	0	0	0
2014_16	2014_16_01	2014_16_01_4_2	FE	F	E	94	2	8.2	1.8	0.021276596	0.019148936	1.5	20	0	1	1	0	1	0	0	1	1	0	10	0	10	8	0	8	13	1	14	9	1	1	2	5	2	3	0.545454545	4	1	3	avoided	0	0	0	0	0
2014_16	2014_16_02	2014_16_02_1_1	FE	F	E	94	2	8.2	1.8	0.021276596	0.019148936	1.5	20	0	1	1	0	1	0	0	1	1	0	17.625	0.5	18.125	11	1	12	13	1	14	9	2	0	2	5	5	0	0.588235294	2	5	5	grazed	0	0	0	0	0
2014_16	2014_16_02	2014_16_02_1_2	FE	F	E	94	2	8.2	1.8	0.021276596	0.019148936	1.5	20	0	1	1	0	1	0	0	1	1	0	17.625	0.5	18.125	11	1	12	13	1	14	9	2	0	2	5	5	0	0.588235294	2	5	5	avoided	0	0	0	0	0
2014_16	2014_16_02	2014_16_02_2_1	FE	F	E	94	2	8.2	1.8	0.021276596	0.019148936	1.5	20	0	1	1	0	1	0	0	1	1	0	17.625	0.5	18.125	11	1	12	13	1	14	9	2	0	2	5	5	0	0.588235294	2	5	5	grazed	0	0	0	0	0
2014_16	2014_16_02	2014_16_02_2_2	FE	F	E	94	2	8.2	1.8	0.021276596	0.019148936	1.5	20	0	1	1	0	1	0	0	1	1	0	17.625	0.5	18.125	11	1	12	13	1	14	9	2	0	2	5	5	0	0.588235294	2	5	5	avoided	0	0	0	0	0
2014_16	2014_16_02	2014_16_02_3_1	FE	F	E	94	2	8.2	1.8	0.021276596	0.019148936	1.5	20	0	1	1	0	1	0	0	1	1	0	17.625	0.5	18.125	11	1	12	13	1	14	9	2	0	2	5	5	0	0.588235294	2	5	5	grazed	0	0	0	0	0
2014_16	2014_16_02	2014_16_02_3_2	FE	F	E	94	2	8.2	1.8	0.021276596	0.019148936	1.5	20	0	1	1	0	1	0	0	1	1	0	17.625	0.5	18.125	11	1	12	13	1	14	9	2	0	2	5	5	0	0.588235294	2	5	5	avoided	0	0	0	0	0
2014_16	2014_16_02	2014_16_02_4_1	FE	F	E	94	2	8.2	1.8	0.021276596	0.019148936	1.5	20	0	1	1	0	1	0	0	1	1	0	17.625	0.5	18.125	11	1	12	13	1	14	9	2	0	2	5	5	0	0.588235294	2	5	5	grazed	0	0	0	0	0
2014_16	2014_16_02	2014_16_02_4_2	FE	F	E	94	2	8.2	1.8	0.021276596	0.019148936	1.5	20	0	1	1	0	1	0	0	1	1	0	17.625	0.5	18.125	11	1	12	13	1	14	9	2	0	2	5	5	0	0.588235294	2	5	5	avoided	0	0	0	0	0
NA	2014_16_03	2014_16_03_1_1	NA	NA	NA	NA	NA	NA	NA	NA	NA	NA	NA	NA	NA	NA	NA	NA	NA	NA	NA	NA	NA	NA	NA	NA	NA	NA	NA	NA	NA	NA	NA	NA	NA	NA	NA	NA	NA	NA	NA	NA	NA	grazed	0	0	0	0	0
NA	2014_16_03	2014_16_03_1_2	NA	NA	NA	NA	NA	NA	NA	NA	NA	NA	NA	NA	NA	NA	NA	NA	NA	NA	NA	NA	NA	NA	NA	NA	NA	NA	NA	NA	NA	NA	NA	NA	NA	NA	NA	NA	NA	NA	NA	NA	NA	avoided	0	0	0	0	0
NA	2014_16_03	2014_16_03_2_1	NA	NA	NA	NA	NA	NA	NA	NA	NA	NA	NA	NA	NA	NA	NA	NA	NA	NA	NA	NA	NA	NA	NA	NA	NA	NA	NA	NA	NA	NA	NA	NA	NA	NA	NA	NA	NA	NA	NA	NA	NA	grazed	0	0	0	0	0
NA	2014_16_03	2014_16_03_2_2	NA	NA	NA	NA	NA	NA	NA	NA	NA	NA	NA	NA	NA	NA	NA	NA	NA	NA	NA	NA	NA	NA	NA	NA	NA	NA	NA	NA	NA	NA	NA	NA	NA	NA	NA	NA	NA	NA	NA	NA	NA	avoided	0	0	0	0	0
NA	2014_16_03	2014_16_03_3_1	NA	NA	NA	NA	NA	NA	NA	NA	NA	NA	NA	NA	NA	NA	NA	NA	NA	NA	NA	NA	NA	NA	NA	NA	NA	NA	NA	NA	NA	NA	NA	NA	NA	NA	NA	NA	NA	NA	NA	NA	NA	grazed	0	0	0	0	0
NA	2014_16_03	2014_16_03_3_2	NA	NA	NA	NA	NA	NA	NA	NA	NA	NA	NA	NA	NA	NA	NA	NA	NA	NA	NA	NA	NA	NA	NA	NA	NA	NA	NA	NA	NA	NA	NA	NA	NA	NA	NA	NA	NA	NA	NA	NA	NA	avoided	0	0	0	0	0
NA	2014_16_03	2014_16_03_4_1	NA	NA	NA	NA	NA	NA	NA	NA	NA	NA	NA	NA	NA	NA	NA	NA	NA	NA	NA	NA	NA	NA	NA	NA	NA	NA	NA	NA	NA	NA	NA	NA	NA	NA	NA	NA	NA	NA	NA	NA	NA	grazed	0	0	0	0	0
NA	2014_16_03	2014_16_03_4_2	NA	NA	NA	NA	NA	NA	NA	NA	NA	NA	NA	NA	NA	NA	NA	NA	NA	NA	NA	NA	NA	NA	NA	NA	NA	NA	NA	NA	NA	NA	NA	NA	NA	NA	NA	NA	NA	NA	NA	NA	NA	avoided	0	0	0	0	0
NA	2014_16_04	2014_16_04_1_1	NA	NA	NA	NA	NA	NA	NA	NA	NA	NA	NA	NA	NA	NA	NA	NA	NA	NA	NA	NA	NA	NA	NA	NA	NA	NA	NA	NA	NA	NA	NA	NA	NA	NA	NA	NA	NA	NA	NA	NA	NA	grazed	0	0	0	0	0
NA	2014_16_04	2014_16_04_1_2	NA	NA	NA	NA	NA	NA	NA	NA	NA	NA	NA	NA	NA	NA	NA	NA	NA	NA	NA	NA	NA	NA	NA	NA	NA	NA	NA	NA	NA	NA	NA	NA	NA	NA	NA	NA	NA	NA	NA	NA	NA	avoided	0	0	0	0	0
NA	2014_16_04	2014_16_04_2_1	NA	NA	NA	NA	NA	NA	NA	NA	NA	NA	NA	NA	NA	NA	NA	NA	NA	NA	NA	NA	NA	NA	NA	NA	NA	NA	NA	NA	NA	NA	NA	NA	NA	NA	NA	NA	NA	NA	NA	NA	NA	grazed	0	0	0	0	0
NA	2014_16_04	2014_16_04_2_2	NA	NA	NA	NA	NA	NA	NA	NA	NA	NA	NA	NA	NA	NA	NA	NA	NA	NA	NA	NA	NA	NA	NA	NA	NA	NA	NA	NA	NA	NA	NA	NA	NA	NA	NA	NA	NA	NA	NA	NA	NA	avoided	0	0	0	0	0
NA	2014_16_04	2014_16_04_3_1	NA	NA	NA	NA	NA	NA	NA	NA	NA	NA	NA	NA	NA	NA	NA	NA	NA	NA	NA	NA	NA	NA	NA	NA	NA	NA	NA	NA	NA	NA	NA	NA	NA	NA	NA	NA	NA	NA	NA	NA	NA	grazed	0	0	0	0	0
NA	2014_16_04	2014_16_04_3_2	NA	NA	NA	NA	NA	NA	NA	NA	NA	NA	NA	NA	NA	NA	NA	NA	NA	NA	NA	NA	NA	NA	NA	NA	NA	NA	NA	NA	NA	NA	NA	NA	NA	NA	NA	NA	NA	NA	NA	NA	NA	avoided	0	0	0	0	0
NA	2014_16_04	2014_16_04_4_1	NA	NA	NA	NA	NA	NA	NA	NA	NA	NA	NA	NA	NA	NA	NA	NA	NA	NA	NA	NA	NA	NA	NA	NA	NA	NA	NA	NA	NA	NA	NA	NA	NA	NA	NA	NA	NA	NA	NA	NA	NA	grazed	0	0	0	0	0
NA	2014_16_04	2014_16_04_4_2	NA	NA	NA	NA	NA	NA	NA	NA	NA	NA	NA	NA	NA	NA	NA	NA	NA	NA	NA	NA	NA	NA	NA	NA	NA	NA	NA	NA	NA	NA	NA	NA	NA	NA	NA	NA	NA	NA	NA	NA	NA	avoided	0	0	0	0	0
2014_17	2014_17_01	2014_17_01_1_1	P_WE	P	WE	2.7	2.7	22.7	2.7	1	1	0.5	90	0	1	1	0	0	0	1	0	1	0	14.25	3.75	18	13	3	16	24	5	29	15.75	2	2	4	7	4	3	0.476190476	6	5	5	grazed	0	0	0	0	0
2014_17	2014_17_01	2014_17_01_1_2	P_WE	P	WE	2.7	2.7	22.7	2.7	1	1	0.5	90	0	1	1	0	0	0	1	0	1	0	14.25	3.75	18	13	3	16	24	5	29	15.75	2	2	4	7	4	3	0.476190476	6	5	5	avoided	0	0	0	0	0
2014_17	2014_17_01	2014_17_01_2_1	P_WE	P	WE	2.7	2.7	22.7	2.7	1	1	0.5	90	0	1	1	0	0	0	1	0	1	0	14.25	3.75	18	13	3	16	24	5	29	15.75	2	2	4	7	4	3	0.476190476	6	5	5	grazed	0	0	0	0	0
2014_17	2014_17_01	2014_17_01_2_2	P_WE	P	WE	2.7	2.7	22.7	2.7	1	1	0.5	90	0	1	1	0	0	0	1	0	1	0	14.25	3.75	18	13	3	16	24	5	29	15.75	2	2	4	7	4	3	0.476190476	6	5	5	avoided	0	0	0	0	0
2014_17	2014_17_01	2014_17_01_3_1	P_WE	P	WE	2.7	2.7	22.7	2.7	1	1	0.5	90	0	1	1	0	0	0	1	0	1	0	14.25	3.75	18	13	3	16	24	5	29	15.75	2	2	4	7	4	3	0.476190476	6	5	5	grazed	0	0	0	0	0
2014_17	2014_17_01	2014_17_01_3_2	P_WE	P	WE	2.7	2.7	22.7	2.7	1	1	0.5	90	0	1	1	0	0	0	1	0	1	0	14.25	3.75	18	13	3	16	24	5	29	15.75	2	2	4	7	4	3	0.476190476	6	5	5	avoided	0	0	0	0	0
2014_17	2014_17_01	2014_17_01_4_1	P_WE	P	WE	2.7	2.7	22.7	2.7	1	1	0.5	90	0	1	1	0	0	0	1	0	1	0	14.25	3.75	18	13	3	16	24	5	29	15.75	2	2	4	7	4	3	0.476190476	6	5	5	grazed	0	0	0	0	0
2014_17	2014_17_01	2014_17_01_4_2	P_WE	P	WE	2.7	2.7	22.7	2.7	1	1	0.5	90	0	1	1	0	0	0	1	0	1	0	14.25	3.75	18	13	3	16	24	5	29	15.75	2	2	4	7	4	3	0.476190476	6	5	5	avoided	0	0	0	0	0
2014_17	2014_17_02	2014_17_02_1_1	P_WE	P	WE	2.7	2.7	22.7	2.7	1	1	0.5	90	0	1	1	0	0	0	1	0	1	0	23.375	8.5	31.875	10	4	14	24	5	29	15.75	3	1	4	7	2	5	0.526315789	7	2	5	grazed	0	0	0	0	0
2014_17	2014_17_02	2014_17_02_1_2	P_WE	P	WE	2.7	2.7	22.7	2.7	1	1	0.5	90	0	1	1	0	0	0	1	0	1	0	23.375	8.5	31.875	10	4	14	24	5	29	15.75	3	1	4	7	2	5	0.526315789	7	2	5	avoided	0	0	0	0	0
2014_17	2014_17_02	2014_17_02_2_1	P_WE	P	WE	2.7	2.7	22.7	2.7	1	1	0.5	90	0	1	1	0	0	0	1	0	1	0	23.375	8.5	31.875	10	4	14	24	5	29	15.75	3	1	4	7	2	5	0.526315789	7	2	5	grazed	0	0	0	0	0
2014_17	2014_17_02	2014_17_02_2_2	P_WE	P	WE	2.7	2.7	22.7	2.7	1	1	0.5	90	0	1	1	0	0	0	1	0	1	0	23.375	8.5	31.875	10	4	14	24	5	29	15.75	3	1	4	7	2	5	0.526315789	7	2	5	avoided	0	0	0	0	0
2014_17	2014_17_02	2014_17_02_3_1	P_WE	P	WE	2.7	2.7	22.7	2.7	1	1	0.5	90	0	1	1	0	0	0	1	0	1	0	23.375	8.5	31.875	10	4	14	24	5	29	15.75	3	1	4	7	2	5	0.526315789	7	2	5	grazed	0	0	0	0	0
2014_17	2014_17_02	2014_17_02_3_2	P_WE	P	WE	2.7	2.7	22.7	2.7	1	1	0.5	90	0	1	1	0	0	0	1	0	1	0	23.375	8.5	31.875	10	4	14	24	5	29	15.75	3	1	4	7	2	5	0.526315789	7	2	5	avoided	0	0	0	0	0
2014_17	2014_17_02	2014_17_02_4_1	P_WE	P	WE	2.7	2.7	22.7	2.7	1	1	0.5	90	0	1	1	0	0	0	1	0	1	0	23.375	8.5	31.875	10	4	14	24	5	29	15.75	3	1	4	7	2	5	0.526315789	7	2	5	grazed	0	0	0	0	0
2014_17	2014_17_02	2014_17_02_4_2	P_WE	P	WE	2.7	2.7	22.7	2.7	1	1	0.5	90	0	1	1	0	0	0	1	0	1	0	23.375	8.5	31.875	10	4	14	24	5	29	15.75	3	1	4	7	2	5	0.526315789	7	2	5	avoided	0	0	0	0	0
2014_17	2014_17_03	2014_17_03_1_1	P_WE	P	WE	2.7	2.7	22.7	2.7	1	1	0.5	90	0	1	1	0	0	0	1	0	1	0	43	0.75	43.75	10	1	11	24	5	29	15.75	0	4	4	7	5	2	0.625	4	2	5	grazed	0	0	0	0	0
2014_17	2014_17_03	2014_17_03_1_2	P_WE	P	WE	2.7	2.7	22.7	2.7	1	1	0.5	90	0	1	1	0	0	0	1	0	1	0	43	0.75	43.75	10	1	11	24	5	29	15.75	0	4	4	7	5	2	0.625	4	2	5	avoided	0	0	0	0	0
2014_17	2014_17_03	2014_17_03_2_1	P_WE	P	WE	2.7	2.7	22.7	2.7	1	1	0.5	90	0	1	1	0	0	0	1	0	1	0	43	0.75	43.75	10	1	11	24	5	29	15.75	0	4	4	7	5	2	0.625	4	2	5	grazed	0	0	0	0	0
2014_17	2014_17_03	2014_17_03_2_2	P_WE	P	WE	2.7	2.7	22.7	2.7	1	1	0.5	90	0	1	1	0	0	0	1	0	1	0	43	0.75	43.75	10	1	11	24	5	29	15.75	0	4	4	7	5	2	0.625	4	2	5	avoided	0	0	0	0	0
2014_17	2014_17_03	2014_17_03_3_1	P_WE	P	WE	2.7	2.7	22.7	2.7	1	1	0.5	90	0	1	1	0	0	0	1	0	1	0	43	0.75	43.75	10	1	11	24	5	29	15.75	0	4	4	7	5	2	0.625	4	2	5	grazed	0	0	0	0	0
2014_17	2014_17_03	2014_17_03_3_2	P_WE	P	WE	2.7	2.7	22.7	2.7	1	1	0.5	90	0	1	1	0	0	0	1	0	1	0	43	0.75	43.75	10	1	11	24	5	29	15.75	0	4	4	7	5	2	0.625	4	2	5	avoided	0	0	0	0	0
2014_17	2014_17_03	2014_17_03_4_1	P_WE	P	WE	2.7	2.7	22.7	2.7	1	1	0.5	90	0	1	1	0	0	0	1	0	1	0	43	0.75	43.75	10	1	11	24	5	29	15.75	0	4	4	7	5	2	0.625	4	2	5	grazed	0	0	0	0	0
2014_17	2014_17_03	2014_17_03_4_2	P_WE	P	WE	2.7	2.7	22.7	2.7	1	1	0.5	90	0	1	1	0	0	0	1	0	1	0	43	0.75	43.75	10	1	11	24	5	29	15.75	0	4	4	7	5	2	0.625	4	2	5	avoided	0	0	0	0	0
2014_17	2014_17_04	2014_17_04_1_1	P_WE	P	WE	2.7	2.7	22.7	2.7	1	1	0.5	90	1	0	1	0	0	0	0	0	0	1	29.375	5	34.375	9	3	12	24	5	29	15.75	3	1	4	7	1	6	0.5	6	2	4	grazed	0	0	0	0	0
2014_17	2014_17_04	2014_17_04_1_2	P_WE	P	WE	2.7	2.7	22.7	2.7	1	1	0.5	90	1	0	1	0	0	0	0	0	0	1	29.375	5	34.375	9	3	12	24	5	29	15.75	3	1	4	7	1	6	0.5	6	2	4	avoided	0	0	0	0	0
2014_17	2014_17_04	2014_17_04_2_1	P_WE	P	WE	2.7	2.7	22.7	2.7	1	1	0.5	90	1	0	1	0	0	0	0	0	0	1	29.375	5	34.375	9	3	12	24	5	29	15.75	3	1	4	7	1	6	0.5	6	2	4	grazed	0	0	0	0	0
2014_17	2014_17_04	2014_17_04_2_2	P_WE	P	WE	2.7	2.7	22.7	2.7	1	1	0.5	90	1	0	1	0	0	0	0	0	0	1	29.375	5	34.375	9	3	12	24	5	29	15.75	3	1	4	7	1	6	0.5	6	2	4	avoided	0	0	0	0	0
2014_17	2014_17_04	2014_17_04_3_1	P_WE	P	WE	2.7	2.7	22.7	2.7	1	1	0.5	90	1	0	1	0	0	0	0	0	0	1	29.375	5	34.375	9	3	12	24	5	29	15.75	3	1	4	7	1	6	0.5	6	2	4	grazed	0	0	0	0	0
2014_17	2014_17_04	2014_17_04_3_2	P_WE	P	WE	2.7	2.7	22.7	2.7	1	1	0.5	90	1	0	1	0	0	0	0	0	0	1	29.375	5	34.375	9	3	12	24	5	29	15.75	3	1	4	7	1	6	0.5	6	2	4	avoided	0	0	0	0	0
2014_17	2014_17_04	2014_17_04_4_1	P_WE	P	WE	2.7	2.7	22.7	2.7	1	1	0.5	90	1	0	1	0	0	0	0	0	0	1	29.375	5	34.375	9	3	12	24	5	29	15.75	3	1	4	7	1	6	0.5	6	2	4	grazed	0	0	0	0	0
2014_17	2014_17_04	2014_17_04_4_2	P_WE	P	WE	2.7	2.7	22.7	2.7	1	1	0.5	90	1	0	1	0	0	0	0	0	0	1	29.375	5	34.375	9	3	12	24	5	29	15.75	3	1	4	7	1	6	0.5	6	2	4	avoided	0	0	0	0	0
NA	2014_18_01	2014_18_01_1_1	NA	NA	NA	NA	NA	NA	NA	NA	NA	NA	NA	NA	NA	NA	NA	NA	NA	NA	NA	NA	NA	NA	NA	NA	NA	NA	NA	NA	NA	NA	NA	NA	NA	NA	NA	NA	NA	NA	NA	NA	NA	grazed	0	0	0	0	0
NA	2014_18_01	2014_18_01_1_2	NA	NA	NA	NA	NA	NA	NA	NA	NA	NA	NA	NA	NA	NA	NA	NA	NA	NA	NA	NA	NA	NA	NA	NA	NA	NA	NA	NA	NA	NA	NA	NA	NA	NA	NA	NA	NA	NA	NA	NA	NA	avoided	0	0	0	0	0
NA	2014_18_01	2014_18_01_2_1	NA	NA	NA	NA	NA	NA	NA	NA	NA	NA	NA	NA	NA	NA	NA	NA	NA	NA	NA	NA	NA	NA	NA	NA	NA	NA	NA	NA	NA	NA	NA	NA	NA	NA	NA	NA	NA	NA	NA	NA	NA	grazed	1	0	0	0	0
NA	2014_18_01	2014_18_01_2_2	NA	NA	NA	NA	NA	NA	NA	NA	NA	NA	NA	NA	NA	NA	NA	NA	NA	NA	NA	NA	NA	NA	NA	NA	NA	NA	NA	NA	NA	NA	NA	NA	NA	NA	NA	NA	NA	NA	NA	NA	NA	avoided	0	0	0	0	0
NA	2014_18_01	2014_18_01_3_1	NA	NA	NA	NA	NA	NA	NA	NA	NA	NA	NA	NA	NA	NA	NA	NA	NA	NA	NA	NA	NA	NA	NA	NA	NA	NA	NA	NA	NA	NA	NA	NA	NA	NA	NA	NA	NA	NA	NA	NA	NA	grazed	0	0	0	0	0
NA	2014_18_01	2014_18_01_3_2	NA	NA	NA	NA	NA	NA	NA	NA	NA	NA	NA	NA	NA	NA	NA	NA	NA	NA	NA	NA	NA	NA	NA	NA	NA	NA	NA	NA	NA	NA	NA	NA	NA	NA	NA	NA	NA	NA	NA	NA	NA	avoided	0	0	0	0	0
NA	2014_18_01	2014_18_01_4_1	NA	NA	NA	NA	NA	NA	NA	NA	NA	NA	NA	NA	NA	NA	NA	NA	NA	NA	NA	NA	NA	NA	NA	NA	NA	NA	NA	NA	NA	NA	NA	NA	NA	NA	NA	NA	NA	NA	NA	NA	NA	grazed	0	0	0	0	0
NA	2014_18_01	2014_18_01_4_2	NA	NA	NA	NA	NA	NA	NA	NA	NA	NA	NA	NA	NA	NA	NA	NA	NA	NA	NA	NA	NA	NA	NA	NA	NA	NA	NA	NA	NA	NA	NA	NA	NA	NA	NA	NA	NA	NA	NA	NA	NA	avoided	0	0	0	0	0
2014_18	2014_18_02	2014_18_02_1_1	PE	P	E	40	35.5	12	12	0.8875	0.3	0.5	0	1	0	1	1	1	0	0	0	1	0	9.375	12	21.375	11	1	12	19	4	23	9.5	0	0	0	8	6	2	0.4	3	6	3	grazed	0	0	0	0	0
2014_18	2014_18_02	2014_18_02_1_2	PE	P	E	40	35.5	12	12	0.8875	0.3	0.5	0	1	0	1	1	1	0	0	0	1	0	9.375	12	21.375	11	1	12	19	4	23	9.5	0	0	0	8	6	2	0.4	3	6	3	avoided	0	0	0	0	0
2014_18	2014_18_02	2014_18_02_2_1	PE	P	E	40	35.5	12	12	0.8875	0.3	0.5	0	1	0	1	1	1	0	0	0	1	0	9.375	12	21.375	11	1	12	19	4	23	9.5	0	0	0	8	6	2	0.4	3	6	3	grazed	0	0	0	0	0
2014_18	2014_18_02	2014_18_02_2_2	PE	P	E	40	35.5	12	12	0.8875	0.3	0.5	0	1	0	1	1	1	0	0	0	1	0	9.375	12	21.375	11	1	12	19	4	23	9.5	0	0	0	8	6	2	0.4	3	6	3	avoided	0	0	0	0	0
2014_18	2014_18_02	2014_18_02_3_1	PE	P	E	40	35.5	12	12	0.8875	0.3	0.5	0	1	0	1	1	1	0	0	0	1	0	9.375	12	21.375	11	1	12	19	4	23	9.5	0	0	0	8	6	2	0.4	3	6	3	grazed	0	0	0	0	0
2014_18	2014_18_02	2014_18_02_3_2	PE	P	E	40	35.5	12	12	0.8875	0.3	0.5	0	1	0	1	1	1	0	0	0	1	0	9.375	12	21.375	11	1	12	19	4	23	9.5	0	0	0	8	6	2	0.4	3	6	3	avoided	0	0	0	0	0
2014_18	2014_18_02	2014_18_02_4_1	PE	P	E	40	35.5	12	12	0.8875	0.3	0.5	0	1	0	1	1	1	0	0	0	1	0	9.375	12	21.375	11	1	12	19	4	23	9.5	0	0	0	8	6	2	0.4	3	6	3	grazed	1	0	0	0	0
2014_18	2014_18_02	2014_18_02_4_2	PE	P	E	40	35.5	12	12	0.8875	0.3	0.5	0	1	0	1	1	1	0	0	0	1	0	9.375	12	21.375	11	1	12	19	4	23	9.5	0	0	0	8	6	2	0.4	3	6	3	avoided	0	0	0	0	0
2014_18	2014_18_03	2014_18_03_1_1	PE	P	E	40	35.5	12	12	0.8875	0.3	0.5	0	1	0	1	1	1	0	0	0	1	1	11.625	3.375	15	14	3	17	19	4	23	9.5	0	0	0	8	4	4	0.52173913	10	1	6	grazed	1	0	0	0	0
2014_18	2014_18_03	2014_18_03_1_2	PE	P	E	40	35.5	12	12	0.8875	0.3	0.5	0	1	0	1	1	1	0	0	0	1	1	11.625	3.375	15	14	3	17	19	4	23	9.5	0	0	0	8	4	4	0.52173913	10	1	6	avoided	0	0	0	0	0
2014_18	2014_18_03	2014_18_03_2_1	PE	P	E	40	35.5	12	12	0.8875	0.3	0.5	0	1	0	1	1	1	0	0	0	1	1	11.625	3.375	15	14	3	17	19	4	23	9.5	0	0	0	8	4	4	0.52173913	10	1	6	grazed	0	0	0	0	0
2014_18	2014_18_03	2014_18_03_2_2	PE	P	E	40	35.5	12	12	0.8875	0.3	0.5	0	1	0	1	1	1	0	0	0	1	1	11.625	3.375	15	14	3	17	19	4	23	9.5	0	0	0	8	4	4	0.52173913	10	1	6	avoided	0	0	0	0	0
2014_18	2014_18_03	2014_18_03_3_1	PE	P	E	40	35.5	12	12	0.8875	0.3	0.5	0	1	0	1	1	1	0	0	0	1	1	11.625	3.375	15	14	3	17	19	4	23	9.5	0	0	0	8	4	4	0.52173913	10	1	6	grazed	1	0	0	0	0
2014_18	2014_18_03	2014_18_03_3_2	PE	P	E	40	35.5	12	12	0.8875	0.3	0.5	0	1	0	1	1	1	0	0	0	1	1	11.625	3.375	15	14	3	17	19	4	23	9.5	0	0	0	8	4	4	0.52173913	10	1	6	avoided	0	0	0	0	0
2014_18	2014_18_03	2014_18_03_4_1	PE	P	E	40	35.5	12	12	0.8875	0.3	0.5	0	1	0	1	1	1	0	0	0	1	1	11.625	3.375	15	14	3	17	19	4	23	9.5	0	0	0	8	4	4	0.52173913	10	1	6	grazed	0	0	0	0	0
2014_18	2014_18_03	2014_18_03_4_2	PE	P	E	40	35.5	12	12	0.8875	0.3	0.5	0	1	0	1	1	1	0	0	0	1	1	11.625	3.375	15	14	3	17	19	4	23	9.5	0	0	0	8	4	4	0.52173913	10	1	6	avoided	0	0	0	0	0
2014_18	2014_18_04	2014_18_04_1_1	PE	P	E	40	35.5	12	12	0.8875	0.3	0.5	0	1	0	1	1	1	0	0	0	1	1	26.125	6.375	32.5	11	3	14	19	4	23	9.5	0	0	0	8	7	1	0.727272727	3	3	8	grazed	0	0	0	0	0
2014_18	2014_18_04	2014_18_04_1_2	PE	P	E	40	35.5	12	12	0.8875	0.3	0.5	0	1	0	1	1	1	0	0	0	1	1	26.125	6.375	32.5	11	3	14	19	4	23	9.5	0	0	0	8	7	1	0.727272727	3	3	8	avoided	0	0	0	0	0
2014_18	2014_18_04	2014_18_04_2_1	PE	P	E	40	35.5	12	12	0.8875	0.3	0.5	0	1	0	1	1	1	0	0	0	1	1	26.125	6.375	32.5	11	3	14	19	4	23	9.5	0	0	0	8	7	1	0.727272727	3	3	8	grazed	0	0	0	0	0
2014_18	2014_18_04	2014_18_04_2_2	PE	P	E	40	35.5	12	12	0.8875	0.3	0.5	0	1	0	1	1	1	0	0	0	1	1	26.125	6.375	32.5	11	3	14	19	4	23	9.5	0	0	0	8	7	1	0.727272727	3	3	8	avoided	0	0	0	0	0
2014_18	2014_18_04	2014_18_04_3_1	PE	P	E	40	35.5	12	12	0.8875	0.3	0.5	0	1	0	1	1	1	0	0	0	1	1	26.125	6.375	32.5	11	3	14	19	4	23	9.5	0	0	0	8	7	1	0.727272727	3	3	8	grazed	0	0	0	0	0
2014_18	2014_18_04	2014_18_04_3_2	PE	P	E	40	35.5	12	12	0.8875	0.3	0.5	0	1	0	1	1	1	0	0	0	1	1	26.125	6.375	32.5	11	3	14	19	4	23	9.5	0	0	0	8	7	1	0.727272727	3	3	8	avoided	0	0	0	0	0
2014_18	2014_18_04	2014_18_04_4_1	PE	P	E	40	35.5	12	12	0.8875	0.3	0.5	0	1	0	1	1	1	0	0	0	1	1	26.125	6.375	32.5	11	3	14	19	4	23	9.5	0	0	0	8	7	1	0.727272727	3	3	8	grazed	0	0	0	0	0
2014_18	2014_18_04	2014_18_04_4_2	PE	P	E	40	35.5	12	12	0.8875	0.3	0.5	0	1	0	1	1	1	0	0	0	1	1	26.125	6.375	32.5	11	3	14	19	4	23	9.5	0	0	0	8	7	1	0.727272727	3	3	8	avoided	0	0	0	0	0
2014_19	2014_19_01	2014_19_01_1_1	FWE	F	WE	47.16	44.05	38	44.05	0.934054283	0.934054283	2	0	0	0	1	1	1	0	0	0	0	0	11.1875	11.1875	22.375	10	1	11	28	7	35	17.5	1	2	3	9	4	5	0.777777778	1	3	7	grazed	1	0	0	0	0
2014_19	2014_19_01	2014_19_01_1_2	FWE	F	WE	47.16	44.05	38	44.05	0.934054283	0.934054283	2	0	0	0	1	1	1	0	0	0	0	0	11.1875	11.1875	22.375	10	1	11	28	7	35	17.5	1	2	3	9	4	5	0.777777778	1	3	7	avoided	0	0	0	0	0
2014_19	2014_19_01	2014_19_01_2_1	FWE	F	WE	47.16	44.05	38	44.05	0.934054283	0.934054283	2	0	0	0	1	1	1	0	0	0	0	0	11.1875	11.1875	22.375	10	1	11	28	7	35	17.5	1	2	3	9	4	5	0.777777778	1	3	7	grazed	1	0	0	0	0
2014_19	2014_19_01	2014_19_01_2_2	FWE	F	WE	47.16	44.05	38	44.05	0.934054283	0.934054283	2	0	0	0	1	1	1	0	0	0	0	0	11.1875	11.1875	22.375	10	1	11	28	7	35	17.5	1	2	3	9	4	5	0.777777778	1	3	7	avoided	0	0	0	0	0
2014_19	2014_19_01	2014_19_01_3_1	FWE	F	WE	47.16	44.05	38	44.05	0.934054283	0.934054283	2	0	0	0	1	1	1	0	0	0	0	0	11.1875	11.1875	22.375	10	1	11	28	7	35	17.5	1	2	3	9	4	5	0.777777778	1	3	7	grazed	0	0	0	0	0
2014_19	2014_19_01	2014_19_01_3_2	FWE	F	WE	47.16	44.05	38	44.05	0.934054283	0.934054283	2	0	0	0	1	1	1	0	0	0	0	0	11.1875	11.1875	22.375	10	1	11	28	7	35	17.5	1	2	3	9	4	5	0.777777778	1	3	7	avoided	0	0	0	0	0
2014_19	2014_19_01	2014_19_01_4_1	FWE	F	WE	47.16	44.05	38	44.05	0.934054283	0.934054283	2	0	0	0	1	1	1	0	0	0	0	0	11.1875	11.1875	22.375	10	1	11	28	7	35	17.5	1	2	3	9	4	5	0.777777778	1	3	7	grazed	0	0	0	0	0
2014_19	2014_19_01	2014_19_01_4_2	FWE	F	WE	47.16	44.05	38	44.05	0.934054283	0.934054283	2	0	0	0	1	1	1	0	0	0	0	0	11.1875	11.1875	22.375	10	1	11	28	7	35	17.5	1	2	3	9	4	5	0.777777778	1	3	7	avoided	0	0	0	0	0
2014_19	2014_19_02	2014_19_02_1_1	FWE	F	WE	47.16	44.05	38	44.05	0.934054283	0.934054283	2	0	0	0	1	1	1	0	0	0	0	0	8.3125	8.3125	16.625	20	4	24	28	7	35	17.5	2	1	3	9	7	2	0.588235294	9	5	10	grazed	0	0	0	0	0
2014_19	2014_19_02	2014_19_02_1_2	FWE	F	WE	47.16	44.05	38	44.05	0.934054283	0.934054283	2	0	0	0	1	1	1	0	0	0	0	0	8.3125	8.3125	16.625	20	4	24	28	7	35	17.5	2	1	3	9	7	2	0.588235294	9	5	10	avoided	0	0	0	0	0
2014_19	2014_19_02	2014_19_02_2_1	FWE	F	WE	47.16	44.05	38	44.05	0.934054283	0.934054283	2	0	0	0	1	1	1	0	0	0	0	0	8.3125	8.3125	16.625	20	4	24	28	7	35	17.5	2	1	3	9	7	2	0.588235294	9	5	10	grazed	0	0	0	0	0
2014_19	2014_19_02	2014_19_02_2_2	FWE	F	WE	47.16	44.05	38	44.05	0.934054283	0.934054283	2	0	0	0	1	1	1	0	0	0	0	0	8.3125	8.3125	16.625	20	4	24	28	7	35	17.5	2	1	3	9	7	2	0.588235294	9	5	10	avoided	0	0	0	0	0
2014_19	2014_19_02	2014_19_02_3_1	FWE	F	WE	47.16	44.05	38	44.05	0.934054283	0.934054283	2	0	0	0	1	1	1	0	0	0	0	0	8.3125	8.3125	16.625	20	4	24	28	7	35	17.5	2	1	3	9	7	2	0.588235294	9	5	10	grazed	0	0	0	0	0
2014_19	2014_19_02	2014_19_02_3_2	FWE	F	WE	47.16	44.05	38	44.05	0.934054283	0.934054283	2	0	0	0	1	1	1	0	0	0	0	0	8.3125	8.3125	16.625	20	4	24	28	7	35	17.5	2	1	3	9	7	2	0.588235294	9	5	10	avoided	0	0	0	0	0
2014_19	2014_19_02	2014_19_02_4_1	FWE	F	WE	47.16	44.05	38	44.05	0.934054283	0.934054283	2	0	0	0	1	1	1	0	0	0	0	0	8.3125	8.3125	16.625	20	4	24	28	7	35	17.5	2	1	3	9	7	2	0.588235294	9	5	10	grazed	0	0	0	0	0
2014_19	2014_19_02	2014_19_02_4_2	FWE	F	WE	47.16	44.05	38	44.05	0.934054283	0.934054283	2	0	0	0	1	1	1	0	0	0	0	0	8.3125	8.3125	16.625	20	4	24	28	7	35	17.5	2	1	3	9	7	2	0.588235294	9	5	10	avoided	0	0	0	0	0
2014_19	2014_19_03	2014_19_03_1_1	FWE	F	WE	47.16	44.05	38	44.05	0.934054283	0.934054283	2	0	0	0	1	1	1	0	0	0	0	1	6.25	6.25	12.5	14	5	19	28	7	35	17.5	1	2	3	9	5	4	0.689655172	3	6	10	grazed	0	0	0	0	0
2014_19	2014_19_03	2014_19_03_1_2	FWE	F	WE	47.16	44.05	38	44.05	0.934054283	0.934054283	2	0	0	0	1	1	1	0	0	0	0	1	6.25	6.25	12.5	14	5	19	28	7	35	17.5	1	2	3	9	5	4	0.689655172	3	6	10	avoided	0	0	0	0	0
2014_19	2014_19_03	2014_19_03_2_1	FWE	F	WE	47.16	44.05	38	44.05	0.934054283	0.934054283	2	0	0	0	1	1	1	0	0	0	0	1	6.25	6.25	12.5	14	5	19	28	7	35	17.5	1	2	3	9	5	4	0.689655172	3	6	10	grazed	0	0	0	0	0
2014_19	2014_19_03	2014_19_03_2_2	FWE	F	WE	47.16	44.05	38	44.05	0.934054283	0.934054283	2	0	0	0	1	1	1	0	0	0	0	1	6.25	6.25	12.5	14	5	19	28	7	35	17.5	1	2	3	9	5	4	0.689655172	3	6	10	avoided	0	0	0	0	0
2014_19	2014_19_03	2014_19_03_3_1	FWE	F	WE	47.16	44.05	38	44.05	0.934054283	0.934054283	2	0	0	0	1	1	1	0	0	0	0	1	6.25	6.25	12.5	14	5	19	28	7	35	17.5	1	2	3	9	5	4	0.689655172	3	6	10	grazed	0	0	0	0	0
2014_19	2014_19_03	2014_19_03_3_2	FWE	F	WE	47.16	44.05	38	44.05	0.934054283	0.934054283	2	0	0	0	1	1	1	0	0	0	0	1	6.25	6.25	12.5	14	5	19	28	7	35	17.5	1	2	3	9	5	4	0.689655172	3	6	10	avoided	0	0	0	0	0
2014_19	2014_19_03	2014_19_03_4_1	FWE	F	WE	47.16	44.05	38	44.05	0.934054283	0.934054283	2	0	0	0	1	1	1	0	0	0	0	1	6.25	6.25	12.5	14	5	19	28	7	35	17.5	1	2	3	9	5	4	0.689655172	3	6	10	grazed	0	0	0	0	0
2014_19	2014_19_03	2014_19_03_4_2	FWE	F	WE	47.16	44.05	38	44.05	0.934054283	0.934054283	2	0	0	0	1	1	1	0	0	0	0	1	6.25	6.25	12.5	14	5	19	28	7	35	17.5	1	2	3	9	5	4	0.689655172	3	6	10	avoided	0	0	0	0	0
2014_19	2014_19_04	2014_19_04_1_1	FWE	F	WE	47.16	44.05	38	44.05	0.934054283	0.934054283	2	0	0	0	1	1	1	0	0	0	0	1	4.875	4.875	9.75	12	4	16	28	7	35	17.5	2	1	3	9	5	4	0.545454545	5	5	6	grazed	0	0	0	0	0
2014_19	2014_19_04	2014_19_04_1_2	FWE	F	WE	47.16	44.05	38	44.05	0.934054283	0.934054283	2	0	0	0	1	1	1	0	0	0	0	1	4.875	4.875	9.75	12	4	16	28	7	35	17.5	2	1	3	9	5	4	0.545454545	5	5	6	avoided	0	0	0	0	0
2014_19	2014_19_04	2014_19_04_2_1	FWE	F	WE	47.16	44.05	38	44.05	0.934054283	0.934054283	2	0	0	0	1	1	1	0	0	0	0	1	4.875	4.875	9.75	12	4	16	28	7	35	17.5	2	1	3	9	5	4	0.545454545	5	5	6	grazed	0	0	0	0	0
2014_19	2014_19_04	2014_19_04_2_2	FWE	F	WE	47.16	44.05	38	44.05	0.934054283	0.934054283	2	0	0	0	1	1	1	0	0	0	0	1	4.875	4.875	9.75	12	4	16	28	7	35	17.5	2	1	3	9	5	4	0.545454545	5	5	6	avoided	0	0	0	0	0
2014_19	2014_19_04	2014_19_04_3_1	FWE	F	WE	47.16	44.05	38	44.05	0.934054283	0.934054283	2	0	0	0	1	1	1	0	0	0	0	1	4.875	4.875	9.75	12	4	16	28	7	35	17.5	2	1	3	9	5	4	0.545454545	5	5	6	grazed	0	0	0	0	0
2014_19	2014_19_04	2014_19_04_3_2	FWE	F	WE	47.16	44.05	38	44.05	0.934054283	0.934054283	2	0	0	0	1	1	1	0	0	0	0	1	4.875	4.875	9.75	12	4	16	28	7	35	17.5	2	1	3	9	5	4	0.545454545	5	5	6	avoided	0	0	0	0	0
2014_19	2014_19_04	2014_19_04_4_1	FWE	F	WE	47.16	44.05	38	44.05	0.934054283	0.934054283	2	0	0	0	1	1	1	0	0	0	0	1	4.875	4.875	9.75	12	4	16	28	7	35	17.5	2	1	3	9	5	4	0.545454545	5	5	6	grazed	0	0	0	0	0
2014_19	2014_19_04	2014_19_04_4_2	FWE	F	WE	47.16	44.05	38	44.05	0.934054283	0.934054283	2	0	0	0	1	1	1	0	0	0	0	1	4.875	4.875	9.75	12	4	16	28	7	35	17.5	2	1	3	9	5	4	0.545454545	5	5	6	avoided	0	0	0	0	0
NA	2014_20_01	2014_20_01_1_1	NA	NA	NA	NA	NA	NA	NA	NA	NA	NA	NA	NA	NA	NA	NA	NA	NA	NA	NA	NA	NA	NA	NA	NA	NA	NA	NA	NA	NA	NA	NA	NA	NA	NA	NA	NA	NA	NA	NA	NA	NA	grazed	1	0	0	0	0
NA	2014_20_01	2014_20_01_1_2	NA	NA	NA	NA	NA	NA	NA	NA	NA	NA	NA	NA	NA	NA	NA	NA	NA	NA	NA	NA	NA	NA	NA	NA	NA	NA	NA	NA	NA	NA	NA	NA	NA	NA	NA	NA	NA	NA	NA	NA	NA	avoided	1	0	0	0	0
NA	2014_20_01	2014_20_01_2_1	NA	NA	NA	NA	NA	NA	NA	NA	NA	NA	NA	NA	NA	NA	NA	NA	NA	NA	NA	NA	NA	NA	NA	NA	NA	NA	NA	NA	NA	NA	NA	NA	NA	NA	NA	NA	NA	NA	NA	NA	NA	grazed	1	0	0	0	0
NA	2014_20_01	2014_20_01_2_2	NA	NA	NA	NA	NA	NA	NA	NA	NA	NA	NA	NA	NA	NA	NA	NA	NA	NA	NA	NA	NA	NA	NA	NA	NA	NA	NA	NA	NA	NA	NA	NA	NA	NA	NA	NA	NA	NA	NA	NA	NA	avoided	1	0	0	0	0
NA	2014_20_01	2014_20_01_3_1	NA	NA	NA	NA	NA	NA	NA	NA	NA	NA	NA	NA	NA	NA	NA	NA	NA	NA	NA	NA	NA	NA	NA	NA	NA	NA	NA	NA	NA	NA	NA	NA	NA	NA	NA	NA	NA	NA	NA	NA	NA	grazed	1	0	0	0	0
NA	2014_20_01	2014_20_01_3_2	NA	NA	NA	NA	NA	NA	NA	NA	NA	NA	NA	NA	NA	NA	NA	NA	NA	NA	NA	NA	NA	NA	NA	NA	NA	NA	NA	NA	NA	NA	NA	NA	NA	NA	NA	NA	NA	NA	NA	NA	NA	avoided	1	0	0	0	0
NA	2014_20_01	2014_20_01_4_1	NA	NA	NA	NA	NA	NA	NA	NA	NA	NA	NA	NA	NA	NA	NA	NA	NA	NA	NA	NA	NA	NA	NA	NA	NA	NA	NA	NA	NA	NA	NA	NA	NA	NA	NA	NA	NA	NA	NA	NA	NA	grazed	0	0	0	0	0
NA	2014_20_01	2014_20_01_4_2	NA	NA	NA	NA	NA	NA	NA	NA	NA	NA	NA	NA	NA	NA	NA	NA	NA	NA	NA	NA	NA	NA	NA	NA	NA	NA	NA	NA	NA	NA	NA	NA	NA	NA	NA	NA	NA	NA	NA	NA	NA	avoided	1	0	0	0	0
2014_20	2014_20_02	2014_20_02_1_1	P_WE	P	WE	20	18	15.4	18	0.9	0.9	1	50	0	1	1	1	1	0	1	0	1	0	36.375	12.375	48.75	8	1	9	11	1	12	5.25	0	0	0	5	4	1	0.5	2	4	3	grazed	1	0	0	0	0
2014_20	2014_20_02	2014_20_02_1_2	P_WE	P	WE	20	18	15.4	18	0.9	0.9	1	50	0	1	1	1	1	0	1	0	1	0	36.375	12.375	48.75	8	1	9	11	1	12	5.25	0	0	0	5	4	1	0.5	2	4	3	avoided	1	0	0	0	0
2014_20	2014_20_02	2014_20_02_2_1	P_WE	P	WE	20	18	15.4	18	0.9	0.9	1	50	0	1	1	1	1	0	1	0	1	0	36.375	12.375	48.75	8	1	9	11	1	12	5.25	0	0	0	5	4	1	0.5	2	4	3	grazed	1	0	0	0	0
2014_20	2014_20_02	2014_20_02_2_2	P_WE	P	WE	20	18	15.4	18	0.9	0.9	1	50	0	1	1	1	1	0	1	0	1	0	36.375	12.375	48.75	8	1	9	11	1	12	5.25	0	0	0	5	4	1	0.5	2	4	3	avoided	1	0	0	0	0
2014_20	2014_20_02	2014_20_02_3_1	P_WE	P	WE	20	18	15.4	18	0.9	0.9	1	50	0	1	1	1	1	0	1	0	1	0	36.375	12.375	48.75	8	1	9	11	1	12	5.25	0	0	0	5	4	1	0.5	2	4	3	grazed	0	0	0	0	0
2014_20	2014_20_02	2014_20_02_3_2	P_WE	P	WE	20	18	15.4	18	0.9	0.9	1	50	0	1	1	1	1	0	1	0	1	0	36.375	12.375	48.75	8	1	9	11	1	12	5.25	0	0	0	5	4	1	0.5	2	4	3	avoided	1	0	0	0	0
2014_20	2014_20_02	2014_20_02_4_1	P_WE	P	WE	20	18	15.4	18	0.9	0.9	1	50	0	1	1	1	1	0	1	0	1	0	36.375	12.375	48.75	8	1	9	11	1	12	5.25	0	0	0	5	4	1	0.5	2	4	3	grazed	0	0	0	0	0
2014_20	2014_20_02	2014_20_02_4_2	P_WE	P	WE	20	18	15.4	18	0.9	0.9	1	50	0	1	1	1	1	0	1	0	1	0	36.375	12.375	48.75	8	1	9	11	1	12	5.25	0	0	0	5	4	1	0.5	2	4	3	avoided	0	0	0	0	0
2014_20	2014_20_03	2014_20_03_1_1	P_WE	P	WE	20	18	15.4	18	0.9	0.9	1	50	0	1	1	1	1	0	1	0	1	1	0.75	0	0.75	4	0	4	11	1	12	5.25	0	0	0	5	2	3	0.4	2	1	1	grazed	0	0	0	0	0
2014_20	2014_20_03	2014_20_03_1_2	P_WE	P	WE	20	18	15.4	18	0.9	0.9	1	50	0	1	1	1	1	0	1	0	1	1	0.75	0	0.75	4	0	4	11	1	12	5.25	0	0	0	5	2	3	0.4	2	1	1	avoided	0	0	0	0	0
2014_20	2014_20_03	2014_20_03_2_1	P_WE	P	WE	20	18	15.4	18	0.9	0.9	1	50	0	1	1	1	1	0	1	0	1	1	0.75	0	0.75	4	0	4	11	1	12	5.25	0	0	0	5	2	3	0.4	2	1	1	grazed	0	0	0	0	0
2014_20	2014_20_03	2014_20_03_2_2	P_WE	P	WE	20	18	15.4	18	0.9	0.9	1	50	0	1	1	1	1	0	1	0	1	1	0.75	0	0.75	4	0	4	11	1	12	5.25	0	0	0	5	2	3	0.4	2	1	1	avoided	0	0	0	0	0
2014_20	2014_20_03	2014_20_03_3_1	P_WE	P	WE	20	18	15.4	18	0.9	0.9	1	50	0	1	1	1	1	0	1	0	1	1	0.75	0	0.75	4	0	4	11	1	12	5.25	0	0	0	5	2	3	0.4	2	1	1	grazed	0	0	0	0	0
2014_20	2014_20_03	2014_20_03_3_2	P_WE	P	WE	20	18	15.4	18	0.9	0.9	1	50	0	1	1	1	1	0	1	0	1	1	0.75	0	0.75	4	0	4	11	1	12	5.25	0	0	0	5	2	3	0.4	2	1	1	avoided	0	0	0	0	0
2014_20	2014_20_03	2014_20_03_4_1	P_WE	P	WE	20	18	15.4	18	0.9	0.9	1	50	0	1	1	1	1	0	1	0	1	1	0.75	0	0.75	4	0	4	11	1	12	5.25	0	0	0	5	2	3	0.4	2	1	1	grazed	0	0	0	0	0
2014_20	2014_20_03	2014_20_03_4_2	P_WE	P	WE	20	18	15.4	18	0.9	0.9	1	50	0	1	1	1	1	0	1	0	1	1	0.75	0	0.75	4	0	4	11	1	12	5.25	0	0	0	5	2	3	0.4	2	1	1	avoided	0	0	0	0	0
2014_20	2014_20_04	2014_20_04_1_1	P_WE	P	WE	20	18	15.4	18	0.9	0.9	1	50	0	1	1	1	1	0	1	0	1	1	16.375	22.875	39.25	5	1	6	11	1	12	5.25	0	0	0	5	3	2	0.285714286	2	3	1	grazed	0	0	0	0	0
2014_20	2014_20_04	2014_20_04_1_2	P_WE	P	WE	20	18	15.4	18	0.9	0.9	1	50	0	1	1	1	1	0	1	0	1	1	16.375	22.875	39.25	5	1	6	11	1	12	5.25	0	0	0	5	3	2	0.285714286	2	3	1	avoided	0	0	0	0	0
2014_20	2014_20_04	2014_20_04_2_1	P_WE	P	WE	20	18	15.4	18	0.9	0.9	1	50	0	1	1	1	1	0	1	0	1	1	16.375	22.875	39.25	5	1	6	11	1	12	5.25	0	0	0	5	3	2	0.285714286	2	3	1	grazed	0	0	0	0	0
2014_20	2014_20_04	2014_20_04_2_2	P_WE	P	WE	20	18	15.4	18	0.9	0.9	1	50	0	1	1	1	1	0	1	0	1	1	16.375	22.875	39.25	5	1	6	11	1	12	5.25	0	0	0	5	3	2	0.285714286	2	3	1	avoided	0	0	0	0	0
2014_20	2014_20_04	2014_20_04_3_1	P_WE	P	WE	20	18	15.4	18	0.9	0.9	1	50	0	1	1	1	1	0	1	0	1	1	16.375	22.875	39.25	5	1	6	11	1	12	5.25	0	0	0	5	3	2	0.285714286	2	3	1	grazed	0	0	0	0	0
2014_20	2014_20_04	2014_20_04_3_2	P_WE	P	WE	20	18	15.4	18	0.9	0.9	1	50	0	1	1	1	1	0	1	0	1	1	16.375	22.875	39.25	5	1	6	11	1	12	5.25	0	0	0	5	3	2	0.285714286	2	3	1	avoided	0	0	0	0	0
2014_20	2014_20_04	2014_20_04_4_1	P_WE	P	WE	20	18	15.4	18	0.9	0.9	1	50	0	1	1	1	1	0	1	0	1	1	16.375	22.875	39.25	5	1	6	11	1	12	5.25	0	0	0	5	3	2	0.285714286	2	3	1	grazed	0	0	0	0	0
2014_20	2014_20_04	2014_20_04_4_2	P_WE	P	WE	20	18	15.4	18	0.9	0.9	1	50	0	1	1	1	1	0	1	0	1	1	16.375	22.875	39.25	5	1	6	11	1	12	5.25	0	0	0	5	3	2	0.285714286	2	3	1	avoided	0	0	0	0	0
2014_21	2014_21_01	2014_21_01_1_1	FWE	F	WE	10	7	55.9	1.63	0.7	0.163	2	100	0	0	1	NA	NA	0	1	0	1	0	27.125	10.375	37.5	9	4	13	18	4	22	10.25	0	0	0	8	2	6	0.631578947	3	4	6	grazed	0	0	0	0	0
2014_21	2014_21_01	2014_21_01_1_2	FWE	F	WE	10	7	55.9	1.63	0.7	0.163	2	100	0	0	1	NA	NA	0	1	0	1	0	27.125	10.375	37.5	9	4	13	18	4	22	10.25	0	0	0	8	2	6	0.631578947	3	4	6	avoided	0	0	0	0	0
2014_21	2014_21_01	2014_21_01_2_1	FWE	F	WE	10	7	55.9	1.63	0.7	0.163	2	100	0	0	1	NA	NA	0	1	0	1	0	27.125	10.375	37.5	9	4	13	18	4	22	10.25	0	0	0	8	2	6	0.631578947	3	4	6	grazed	0	0	0	0	0
2014_21	2014_21_01	2014_21_01_2_2	FWE	F	WE	10	7	55.9	1.63	0.7	0.163	2	100	0	0	1	NA	NA	0	1	0	1	0	27.125	10.375	37.5	9	4	13	18	4	22	10.25	0	0	0	8	2	6	0.631578947	3	4	6	avoided	0	0	0	0	0
2014_21	2014_21_01	2014_21_01_3_1	FWE	F	WE	10	7	55.9	1.63	0.7	0.163	2	100	0	0	1	NA	NA	0	1	0	1	0	27.125	10.375	37.5	9	4	13	18	4	22	10.25	0	0	0	8	2	6	0.631578947	3	4	6	grazed	1	0	0	0	0
2014_21	2014_21_01	2014_21_01_3_2	FWE	F	WE	10	7	55.9	1.63	0.7	0.163	2	100	0	0	1	NA	NA	0	1	0	1	0	27.125	10.375	37.5	9	4	13	18	4	22	10.25	0	0	0	8	2	6	0.631578947	3	4	6	avoided	1	0	0	0	0
2014_21	2014_21_01	2014_21_01_4_1	FWE	F	WE	10	7	55.9	1.63	0.7	0.163	2	100	0	0	1	NA	NA	0	1	0	1	0	27.125	10.375	37.5	9	4	13	18	4	22	10.25	0	0	0	8	2	6	0.631578947	3	4	6	grazed	0	0	0	0	0
2014_21	2014_21_01	2014_21_01_4_2	FWE	F	WE	10	7	55.9	1.63	0.7	0.163	2	100	0	0	1	NA	NA	0	1	0	1	0	27.125	10.375	37.5	9	4	13	18	4	22	10.25	0	0	0	8	2	6	0.631578947	3	4	6	avoided	0	0	0	0	0
2014_21	2014_21_02	2014_21_02_1_1	FWE	F	WE	10	7	55.9	1.63	0.7	0.163	2	100	0	0	1	NA	NA	0	1	0	1	0	57.625	9.875	67.5	13	2	15	18	4	22	10.25	0	0	0	8	7	1	0.695652174	2	5	8	grazed	0	0	0	0	0
2014_21	2014_21_02	2014_21_02_1_2	FWE	F	WE	10	7	55.9	1.63	0.7	0.163	2	100	0	0	1	NA	NA	0	1	0	1	0	57.625	9.875	67.5	13	2	15	18	4	22	10.25	0	0	0	8	7	1	0.695652174	2	5	8	avoided	0	0	0	0	0
2014_21	2014_21_02	2014_21_02_2_1	FWE	F	WE	10	7	55.9	1.63	0.7	0.163	2	100	0	0	1	NA	NA	0	1	0	1	0	57.625	9.875	67.5	13	2	15	18	4	22	10.25	0	0	0	8	7	1	0.695652174	2	5	8	grazed	1	0	0	0	0
2014_21	2014_21_02	2014_21_02_2_2	FWE	F	WE	10	7	55.9	1.63	0.7	0.163	2	100	0	0	1	NA	NA	0	1	0	1	0	57.625	9.875	67.5	13	2	15	18	4	22	10.25	0	0	0	8	7	1	0.695652174	2	5	8	avoided	1	0	0	0	0
2014_21	2014_21_02	2014_21_02_3_1	FWE	F	WE	10	7	55.9	1.63	0.7	0.163	2	100	0	0	1	NA	NA	0	1	0	1	0	57.625	9.875	67.5	13	2	15	18	4	22	10.25	0	0	0	8	7	1	0.695652174	2	5	8	grazed	1	0	0	0	0
2014_21	2014_21_02	2014_21_02_3_2	FWE	F	WE	10	7	55.9	1.63	0.7	0.163	2	100	0	0	1	NA	NA	0	1	0	1	0	57.625	9.875	67.5	13	2	15	18	4	22	10.25	0	0	0	8	7	1	0.695652174	2	5	8	avoided	1	0	0	0	0
2014_21	2014_21_02	2014_21_02_4_1	FWE	F	WE	10	7	55.9	1.63	0.7	0.163	2	100	0	0	1	NA	NA	0	1	0	1	0	57.625	9.875	67.5	13	2	15	18	4	22	10.25	0	0	0	8	7	1	0.695652174	2	5	8	grazed	1	0	0	0	0
2014_21	2014_21_02	2014_21_02_4_2	FWE	F	WE	10	7	55.9	1.63	0.7	0.163	2	100	0	0	1	NA	NA	0	1	0	1	0	57.625	9.875	67.5	13	2	15	18	4	22	10.25	0	0	0	8	7	1	0.695652174	2	5	8	avoided	0	0	0	0	0
2014_21	2014_21_03	2014_21_03_1_1	FWE	F	WE	10	7	55.9	1.63	0.7	0.163	2	100	0	0	1	NA	NA	0	1	0	1	1	5.125	34.125	39.25	6	4	10	18	4	22	10.25	0	0	0	8	1	7	0.666666667	4	1	5	grazed	0	0	0	0	0
2014_21	2014_21_03	2014_21_03_1_2	FWE	F	WE	10	7	55.9	1.63	0.7	0.163	2	100	0	0	1	NA	NA	0	1	0	1	1	5.125	34.125	39.25	6	4	10	18	4	22	10.25	0	0	0	8	1	7	0.666666667	4	1	5	avoided	0	0	0	0	0
2014_21	2014_21_03	2014_21_03_2_1	FWE	F	WE	10	7	55.9	1.63	0.7	0.163	2	100	0	0	1	NA	NA	0	1	0	1	1	5.125	34.125	39.25	6	4	10	18	4	22	10.25	0	0	0	8	1	7	0.666666667	4	1	5	grazed	0	0	0	0	0
2014_21	2014_21_03	2014_21_03_2_2	FWE	F	WE	10	7	55.9	1.63	0.7	0.163	2	100	0	0	1	NA	NA	0	1	0	1	1	5.125	34.125	39.25	6	4	10	18	4	22	10.25	0	0	0	8	1	7	0.666666667	4	1	5	avoided	0	0	0	0	0
2014_21	2014_21_03	2014_21_03_3_1	FWE	F	WE	10	7	55.9	1.63	0.7	0.163	2	100	0	0	1	NA	NA	0	1	0	1	1	5.125	34.125	39.25	6	4	10	18	4	22	10.25	0	0	0	8	1	7	0.666666667	4	1	5	grazed	0	0	0	0	0
2014_21	2014_21_03	2014_21_03_3_2	FWE	F	WE	10	7	55.9	1.63	0.7	0.163	2	100	0	0	1	NA	NA	0	1	0	1	1	5.125	34.125	39.25	6	4	10	18	4	22	10.25	0	0	0	8	1	7	0.666666667	4	1	5	avoided	0	0	0	0	0
2014_21	2014_21_03	2014_21_03_4_1	FWE	F	WE	10	7	55.9	1.63	0.7	0.163	2	100	0	0	1	NA	NA	0	1	0	1	1	5.125	34.125	39.25	6	4	10	18	4	22	10.25	0	0	0	8	1	7	0.666666667	4	1	5	grazed	0	0	0	0	0
2014_21	2014_21_03	2014_21_03_4_2	FWE	F	WE	10	7	55.9	1.63	0.7	0.163	2	100	0	0	1	NA	NA	0	1	0	1	1	5.125	34.125	39.25	6	4	10	18	4	22	10.25	0	0	0	8	1	7	0.666666667	4	1	5	avoided	0	0	0	0	0
2014_21	2014_21_04	2014_21_04_1_1	FWE	F	WE	10	7	55.9	1.63	0.7	0.163	2	100	0	0	1	NA	NA	0	1	0	1	1	17.5	25	42.5	6	3	9	18	4	22	10.25	0	0	0	8	3	5	0.8	1	2	6	grazed	0	0	0	0	0
2014_21	2014_21_04	2014_21_04_1_2	FWE	F	WE	10	7	55.9	1.63	0.7	0.163	2	100	0	0	1	NA	NA	0	1	0	1	1	17.5	25	42.5	6	3	9	18	4	22	10.25	0	0	0	8	3	5	0.8	1	2	6	avoided	0	0	0	0	0
2014_21	2014_21_04	2014_21_04_2_1	FWE	F	WE	10	7	55.9	1.63	0.7	0.163	2	100	0	0	1	NA	NA	0	1	0	1	1	17.5	25	42.5	6	3	9	18	4	22	10.25	0	0	0	8	3	5	0.8	1	2	6	grazed	0	0	0	0	0
2014_21	2014_21_04	2014_21_04_2_2	FWE	F	WE	10	7	55.9	1.63	0.7	0.163	2	100	0	0	1	NA	NA	0	1	0	1	1	17.5	25	42.5	6	3	9	18	4	22	10.25	0	0	0	8	3	5	0.8	1	2	6	avoided	0	0	0	0	0
2014_21	2014_21_04	2014_21_04_3_1	FWE	F	WE	10	7	55.9	1.63	0.7	0.163	2	100	0	0	1	NA	NA	0	1	0	1	1	17.5	25	42.5	6	3	9	18	4	22	10.25	0	0	0	8	3	5	0.8	1	2	6	grazed	0	0	0	0	0
2014_21	2014_21_04	2014_21_04_3_2	FWE	F	WE	10	7	55.9	1.63	0.7	0.163	2	100	0	0	1	NA	NA	0	1	0	1	1	17.5	25	42.5	6	3	9	18	4	22	10.25	0	0	0	8	3	5	0.8	1	2	6	avoided	0	0	0	0	0
2014_21	2014_21_04	2014_21_04_4_1	FWE	F	WE	10	7	55.9	1.63	0.7	0.163	2	100	0	0	1	NA	NA	0	1	0	1	1	17.5	25	42.5	6	3	9	18	4	22	10.25	0	0	0	8	3	5	0.8	1	2	6	grazed	0	0	0	0	0
2014_21	2014_21_04	2014_21_04_4_2	FWE	F	WE	10	7	55.9	1.63	0.7	0.163	2	100	0	0	1	NA	NA	0	1	0	1	1	17.5	25	42.5	6	3	9	18	4	22	10.25	0	0	0	8	3	5	0.8	1	2	6	avoided	0	0	0	0	0
NA	2014_22_01	2014_22_01_1_1	NA	NA	NA	NA	NA	NA	NA	NA	NA	NA	NA	NA	NA	NA	NA	NA	NA	NA	NA	NA	NA	NA	NA	NA	NA	NA	NA	NA	NA	NA	NA	NA	NA	NA	NA	NA	NA	NA	NA	NA	NA	grazed	1	0	0	0	0
NA	2014_22_01	2014_22_01_1_2	NA	NA	NA	NA	NA	NA	NA	NA	NA	NA	NA	NA	NA	NA	NA	NA	NA	NA	NA	NA	NA	NA	NA	NA	NA	NA	NA	NA	NA	NA	NA	NA	NA	NA	NA	NA	NA	NA	NA	NA	NA	avoided	0	0	0	0	0
NA	2014_22_01	2014_22_01_2_1	NA	NA	NA	NA	NA	NA	NA	NA	NA	NA	NA	NA	NA	NA	NA	NA	NA	NA	NA	NA	NA	NA	NA	NA	NA	NA	NA	NA	NA	NA	NA	NA	NA	NA	NA	NA	NA	NA	NA	NA	NA	grazed	1	0	0	0	0
NA	2014_22_01	2014_22_01_2_2	NA	NA	NA	NA	NA	NA	NA	NA	NA	NA	NA	NA	NA	NA	NA	NA	NA	NA	NA	NA	NA	NA	NA	NA	NA	NA	NA	NA	NA	NA	NA	NA	NA	NA	NA	NA	NA	NA	NA	NA	NA	avoided	0	0	0	0	0
NA	2014_22_01	2014_22_01_3_1	NA	NA	NA	NA	NA	NA	NA	NA	NA	NA	NA	NA	NA	NA	NA	NA	NA	NA	NA	NA	NA	NA	NA	NA	NA	NA	NA	NA	NA	NA	NA	NA	NA	NA	NA	NA	NA	NA	NA	NA	NA	grazed	1	0	0	0	0
NA	2014_22_01	2014_22_01_3_2	NA	NA	NA	NA	NA	NA	NA	NA	NA	NA	NA	NA	NA	NA	NA	NA	NA	NA	NA	NA	NA	NA	NA	NA	NA	NA	NA	NA	NA	NA	NA	NA	NA	NA	NA	NA	NA	NA	NA	NA	NA	avoided	1	0	0	0	0
NA	2014_22_01	2014_22_01_4_1	NA	NA	NA	NA	NA	NA	NA	NA	NA	NA	NA	NA	NA	NA	NA	NA	NA	NA	NA	NA	NA	NA	NA	NA	NA	NA	NA	NA	NA	NA	NA	NA	NA	NA	NA	NA	NA	NA	NA	NA	NA	grazed	1	0	0	0	0
NA	2014_22_01	2014_22_01_4_2	NA	NA	NA	NA	NA	NA	NA	NA	NA	NA	NA	NA	NA	NA	NA	NA	NA	NA	NA	NA	NA	NA	NA	NA	NA	NA	NA	NA	NA	NA	NA	NA	NA	NA	NA	NA	NA	NA	NA	NA	NA	avoided	1	0	0	0	0
2014_22	2014_22_02	2014_22_02_1_1	PE	P	E	35	35	9	15	1	0.428571429	1	0	0	1	1	1	1	0	0	0	0	0	0.76125	0.23875	1	5	1	6	11	1	12	5.25	1	1	2	3	0	3	0.666666667	2	1	3	grazed	0	0	0	0	0
2014_22	2014_22_02	2014_22_02_1_2	PE	P	E	35	35	9	15	1	0.428571429	1	0	0	1	1	1	1	0	0	0	0	0	0.76125	0.23875	1	5	1	6	11	1	12	5.25	1	1	2	3	0	3	0.666666667	2	1	3	avoided	1	0	0	0	0
2014_22	2014_22_02	2014_22_02_2_1	PE	P	E	35	35	9	15	1	0.428571429	1	0	0	1	1	1	1	0	0	0	0	0	0.76125	0.23875	1	5	1	6	11	1	12	5.25	1	1	2	3	0	3	0.666666667	2	1	3	grazed	0	0	0	0	0
2014_22	2014_22_02	2014_22_02_2_2	PE	P	E	35	35	9	15	1	0.428571429	1	0	0	1	1	1	1	0	0	0	0	0	0.76125	0.23875	1	5	1	6	11	1	12	5.25	1	1	2	3	0	3	0.666666667	2	1	3	avoided	1	0	0	0	0
2014_22	2014_22_02	2014_22_02_3_1	PE	P	E	35	35	9	15	1	0.428571429	1	0	0	1	1	1	1	0	0	0	0	0	0.76125	0.23875	1	5	1	6	11	1	12	5.25	1	1	2	3	0	3	0.666666667	2	1	3	grazed	0	0	0	0	0
2014_22	2014_22_02	2014_22_02_3_2	PE	P	E	35	35	9	15	1	0.428571429	1	0	0	1	1	1	1	0	0	0	0	0	0.76125	0.23875	1	5	1	6	11	1	12	5.25	1	1	2	3	0	3	0.666666667	2	1	3	avoided	0	0	0	0	0
2014_22	2014_22_02	2014_22_02_4_1	PE	P	E	35	35	9	15	1	0.428571429	1	0	0	1	1	1	1	0	0	0	0	0	0.76125	0.23875	1	5	1	6	11	1	12	5.25	1	1	2	3	0	3	0.666666667	2	1	3	grazed	0	0	0	0	0
2014_22	2014_22_02	2014_22_02_4_2	PE	P	E	35	35	9	15	1	0.428571429	1	0	0	1	1	1	1	0	0	0	0	0	0.76125	0.23875	1	5	1	6	11	1	12	5.25	1	1	2	3	0	3	0.666666667	2	1	3	avoided	0	0	0	0	0
NA	2014_22_03	2014_22_03_1_1	NA	NA	NA	NA	NA	NA	NA	NA	NA	NA	NA	NA	NA	NA	NA	NA	NA	NA	NA	NA	NA	NA	NA	NA	NA	NA	NA	NA	NA	NA	NA	NA	NA	NA	NA	NA	NA	NA	NA	NA	NA	grazed	1	0	0	0	0
NA	2014_22_03	2014_22_03_1_2	NA	NA	NA	NA	NA	NA	NA	NA	NA	NA	NA	NA	NA	NA	NA	NA	NA	NA	NA	NA	NA	NA	NA	NA	NA	NA	NA	NA	NA	NA	NA	NA	NA	NA	NA	NA	NA	NA	NA	NA	NA	avoided	0	0	0	0	0
NA	2014_22_03	2014_22_03_2_1	NA	NA	NA	NA	NA	NA	NA	NA	NA	NA	NA	NA	NA	NA	NA	NA	NA	NA	NA	NA	NA	NA	NA	NA	NA	NA	NA	NA	NA	NA	NA	NA	NA	NA	NA	NA	NA	NA	NA	NA	NA	grazed	1	0	0	0	0
NA	2014_22_03	2014_22_03_2_2	NA	NA	NA	NA	NA	NA	NA	NA	NA	NA	NA	NA	NA	NA	NA	NA	NA	NA	NA	NA	NA	NA	NA	NA	NA	NA	NA	NA	NA	NA	NA	NA	NA	NA	NA	NA	NA	NA	NA	NA	NA	avoided	0	0	0	0	0
NA	2014_22_03	2014_22_03_3_1	NA	NA	NA	NA	NA	NA	NA	NA	NA	NA	NA	NA	NA	NA	NA	NA	NA	NA	NA	NA	NA	NA	NA	NA	NA	NA	NA	NA	NA	NA	NA	NA	NA	NA	NA	NA	NA	NA	NA	NA	NA	grazed	1	0	0	0	0
NA	2014_22_03	2014_22_03_3_2	NA	NA	NA	NA	NA	NA	NA	NA	NA	NA	NA	NA	NA	NA	NA	NA	NA	NA	NA	NA	NA	NA	NA	NA	NA	NA	NA	NA	NA	NA	NA	NA	NA	NA	NA	NA	NA	NA	NA	NA	NA	avoided	1	0	0	0	0
NA	2014_22_03	2014_22_03_4_1	NA	NA	NA	NA	NA	NA	NA	NA	NA	NA	NA	NA	NA	NA	NA	NA	NA	NA	NA	NA	NA	NA	NA	NA	NA	NA	NA	NA	NA	NA	NA	NA	NA	NA	NA	NA	NA	NA	NA	NA	NA	grazed	1	0	0	0	0
NA	2014_22_03	2014_22_03_4_2	NA	NA	NA	NA	NA	NA	NA	NA	NA	NA	NA	NA	NA	NA	NA	NA	NA	NA	NA	NA	NA	NA	NA	NA	NA	NA	NA	NA	NA	NA	NA	NA	NA	NA	NA	NA	NA	NA	NA	NA	NA	avoided	1	0	0	0	0
2014_22	2014_22_04	2014_22_04_1_1	PE	P	E	35	35	9	15	1	0.428571429	1	0	0	1	1	1	1	0	0	0	0	1	1.21	0.29	1.5	7	1	8	11	1	12	5.25	1	1	2	3	1	2	0.666666667	2	2	4	grazed	0	0	0	0	0
2014_22	2014_22_04	2014_22_04_1_2	PE	P	E	35	35	9	15	1	0.428571429	1	0	0	1	1	1	1	0	0	0	0	1	1.21	0.29	1.5	7	1	8	11	1	12	5.25	1	1	2	3	1	2	0.666666667	2	2	4	avoided	1	0	0	0	0
2014_22	2014_22_04	2014_22_04_2_1	PE	P	E	35	35	9	15	1	0.428571429	1	0	0	1	1	1	1	0	0	0	0	1	1.21	0.29	1.5	7	1	8	11	1	12	5.25	1	1	2	3	1	2	0.666666667	2	2	4	grazed	0	0	0	0	0
2014_22	2014_22_04	2014_22_04_2_2	PE	P	E	35	35	9	15	1	0.428571429	1	0	0	1	1	1	1	0	0	0	0	1	1.21	0.29	1.5	7	1	8	11	1	12	5.25	1	1	2	3	1	2	0.666666667	2	2	4	avoided	1	0	0	0	0
2014_22	2014_22_04	2014_22_04_3_1	PE	P	E	35	35	9	15	1	0.428571429	1	0	0	1	1	1	1	0	0	0	0	1	1.21	0.29	1.5	7	1	8	11	1	12	5.25	1	1	2	3	1	2	0.666666667	2	2	4	grazed	0	0	0	0	0
2014_22	2014_22_04	2014_22_04_3_2	PE	P	E	35	35	9	15	1	0.428571429	1	0	0	1	1	1	1	0	0	0	0	1	1.21	0.29	1.5	7	1	8	11	1	12	5.25	1	1	2	3	1	2	0.666666667	2	2	4	avoided	0	0	0	0	0
2014_22	2014_22_04	2014_22_04_4_1	PE	P	E	35	35	9	15	1	0.428571429	1	0	0	1	1	1	1	0	0	0	0	1	1.21	0.29	1.5	7	1	8	11	1	12	5.25	1	1	2	3	1	2	0.666666667	2	2	4	grazed	0	0	0	0	0
2014_22	2014_22_04	2014_22_04_4_2	PE	P	E	35	35	9	15	1	0.428571429	1	0	0	1	1	1	1	0	0	0	0	1	1.21	0.29	1.5	7	1	8	11	1	12	5.25	1	1	2	3	1	2	0.666666667	2	2	4	avoided	0	0	0	0	0
2015_02	2015_02_01	2015_02_01_1_1	P_WE	P	WE	3	3	10.8	3	1	1	1	90	0	0	0	0	1	1	1	0	0	0	55	1.25	56.25	3	0	3	6	2	8	4.25	0	0	0	1	0	1	0.5	1	1	1	grazed	0	0	0	0	0
2015_02	2015_02_01	2015_02_01_1_2	P_WE	P	WE	3	3	10.8	3	1	1	1	90	0	0	0	0	1	1	1	0	0	0	55	1.25	56.25	3	0	3	6	2	8	4.25	0	0	0	1	0	1	0.5	1	1	1	avoided	0	0	0	0	0
2015_02	2015_02_01	2015_02_01_2_1	P_WE	P	WE	3	3	10.8	3	1	1	1	90	0	0	0	0	1	1	1	0	0	0	55	1.25	56.25	3	0	3	6	2	8	4.25	0	0	0	1	0	1	0.5	1	1	1	grazed	0	0	0	0	0
2015_02	2015_02_01	2015_02_01_2_2	P_WE	P	WE	3	3	10.8	3	1	1	1	90	0	0	0	0	1	1	1	0	0	0	55	1.25	56.25	3	0	3	6	2	8	4.25	0	0	0	1	0	1	0.5	1	1	1	avoided	0	0	0	0	0
2015_02	2015_02_01	2015_02_01_3_1	P_WE	P	WE	3	3	10.8	3	1	1	1	90	0	0	0	0	1	1	1	0	0	0	55	1.25	56.25	3	0	3	6	2	8	4.25	0	0	0	1	0	1	0.5	1	1	1	grazed	0	0	0	0	0
2015_02	2015_02_01	2015_02_01_3_2	P_WE	P	WE	3	3	10.8	3	1	1	1	90	0	0	0	0	1	1	1	0	0	0	55	1.25	56.25	3	0	3	6	2	8	4.25	0	0	0	1	0	1	0.5	1	1	1	avoided	0	0	0	0	0
2015_02	2015_02_01	2015_02_01_4_1	P_WE	P	WE	3	3	10.8	3	1	1	1	90	0	0	0	0	1	1	1	0	0	0	55	1.25	56.25	3	0	3	6	2	8	4.25	0	0	0	1	0	1	0.5	1	1	1	grazed	0	0	0	0	0
2015_02	2015_02_01	2015_02_01_4_2	P_WE	P	WE	3	3	10.8	3	1	1	1	90	0	0	0	0	1	1	1	0	0	0	55	1.25	56.25	3	0	3	6	2	8	4.25	0	0	0	1	0	1	0.5	1	1	1	avoided	0	0	0	0	0
NA	2015_02_02	2015_02_02_1_1	NA	NA	NA	NA	NA	NA	NA	NA	NA	NA	NA	NA	NA	NA	NA	NA	NA	NA	NA	NA	NA	NA	NA	NA	NA	NA	NA	NA	NA	NA	NA	NA	NA	NA	NA	NA	NA	NA	NA	NA	NA	grazed	0	0	0	0	0
NA	2015_02_02	2015_02_02_1_2	NA	NA	NA	NA	NA	NA	NA	NA	NA	NA	NA	NA	NA	NA	NA	NA	NA	NA	NA	NA	NA	NA	NA	NA	NA	NA	NA	NA	NA	NA	NA	NA	NA	NA	NA	NA	NA	NA	NA	NA	NA	avoided	0	0	0	0	0
NA	2015_02_02	2015_02_02_2_1	NA	NA	NA	NA	NA	NA	NA	NA	NA	NA	NA	NA	NA	NA	NA	NA	NA	NA	NA	NA	NA	NA	NA	NA	NA	NA	NA	NA	NA	NA	NA	NA	NA	NA	NA	NA	NA	NA	NA	NA	NA	grazed	0	0	0	0	0
NA	2015_02_02	2015_02_02_2_2	NA	NA	NA	NA	NA	NA	NA	NA	NA	NA	NA	NA	NA	NA	NA	NA	NA	NA	NA	NA	NA	NA	NA	NA	NA	NA	NA	NA	NA	NA	NA	NA	NA	NA	NA	NA	NA	NA	NA	NA	NA	avoided	0	0	0	0	0
NA	2015_02_02	2015_02_02_3_1	NA	NA	NA	NA	NA	NA	NA	NA	NA	NA	NA	NA	NA	NA	NA	NA	NA	NA	NA	NA	NA	NA	NA	NA	NA	NA	NA	NA	NA	NA	NA	NA	NA	NA	NA	NA	NA	NA	NA	NA	NA	grazed	0	0	0	0	0
NA	2015_02_02	2015_02_02_3_2	NA	NA	NA	NA	NA	NA	NA	NA	NA	NA	NA	NA	NA	NA	NA	NA	NA	NA	NA	NA	NA	NA	NA	NA	NA	NA	NA	NA	NA	NA	NA	NA	NA	NA	NA	NA	NA	NA	NA	NA	NA	avoided	0	0	0	0	0
NA	2015_02_02	2015_02_02_4_1	NA	NA	NA	NA	NA	NA	NA	NA	NA	NA	NA	NA	NA	NA	NA	NA	NA	NA	NA	NA	NA	NA	NA	NA	NA	NA	NA	NA	NA	NA	NA	NA	NA	NA	NA	NA	NA	NA	NA	NA	NA	grazed	0	0	0	0	0
NA	2015_02_02	2015_02_02_4_2	NA	NA	NA	NA	NA	NA	NA	NA	NA	NA	NA	NA	NA	NA	NA	NA	NA	NA	NA	NA	NA	NA	NA	NA	NA	NA	NA	NA	NA	NA	NA	NA	NA	NA	NA	NA	NA	NA	NA	NA	NA	avoided	0	0	0	0	0
NA	2015_02_03	2015_02_03_1_1	NA	NA	NA	NA	NA	NA	NA	NA	NA	NA	NA	NA	NA	NA	NA	NA	NA	NA	NA	NA	NA	NA	NA	NA	NA	NA	NA	NA	NA	NA	NA	NA	NA	NA	NA	NA	NA	NA	NA	NA	NA	grazed	0	0	0	0	0
NA	2015_02_03	2015_02_03_1_2	NA	NA	NA	NA	NA	NA	NA	NA	NA	NA	NA	NA	NA	NA	NA	NA	NA	NA	NA	NA	NA	NA	NA	NA	NA	NA	NA	NA	NA	NA	NA	NA	NA	NA	NA	NA	NA	NA	NA	NA	NA	avoided	0	0	0	0	0
NA	2015_02_03	2015_02_03_2_1	NA	NA	NA	NA	NA	NA	NA	NA	NA	NA	NA	NA	NA	NA	NA	NA	NA	NA	NA	NA	NA	NA	NA	NA	NA	NA	NA	NA	NA	NA	NA	NA	NA	NA	NA	NA	NA	NA	NA	NA	NA	grazed	0	0	0	0	0
NA	2015_02_03	2015_02_03_2_2	NA	NA	NA	NA	NA	NA	NA	NA	NA	NA	NA	NA	NA	NA	NA	NA	NA	NA	NA	NA	NA	NA	NA	NA	NA	NA	NA	NA	NA	NA	NA	NA	NA	NA	NA	NA	NA	NA	NA	NA	NA	avoided	0	0	0	0	0
NA	2015_02_03	2015_02_03_3_1	NA	NA	NA	NA	NA	NA	NA	NA	NA	NA	NA	NA	NA	NA	NA	NA	NA	NA	NA	NA	NA	NA	NA	NA	NA	NA	NA	NA	NA	NA	NA	NA	NA	NA	NA	NA	NA	NA	NA	NA	NA	grazed	0	0	0	0	0
NA	2015_02_03	2015_02_03_3_2	NA	NA	NA	NA	NA	NA	NA	NA	NA	NA	NA	NA	NA	NA	NA	NA	NA	NA	NA	NA	NA	NA	NA	NA	NA	NA	NA	NA	NA	NA	NA	NA	NA	NA	NA	NA	NA	NA	NA	NA	NA	avoided	0	0	0	0	0
NA	2015_02_03	2015_02_03_4_1	NA	NA	NA	NA	NA	NA	NA	NA	NA	NA	NA	NA	NA	NA	NA	NA	NA	NA	NA	NA	NA	NA	NA	NA	NA	NA	NA	NA	NA	NA	NA	NA	NA	NA	NA	NA	NA	NA	NA	NA	NA	grazed	0	0	0	0	0
NA	2015_02_03	2015_02_03_4_2	NA	NA	NA	NA	NA	NA	NA	NA	NA	NA	NA	NA	NA	NA	NA	NA	NA	NA	NA	NA	NA	NA	NA	NA	NA	NA	NA	NA	NA	NA	NA	NA	NA	NA	NA	NA	NA	NA	NA	NA	NA	avoided	0	0	0	0	0
NA	2015_02_04	2015_02_04_1_1	NA	NA	NA	NA	NA	NA	NA	NA	NA	NA	NA	NA	NA	NA	NA	NA	NA	NA	NA	NA	NA	NA	NA	NA	NA	NA	NA	NA	NA	NA	NA	NA	NA	NA	NA	NA	NA	NA	NA	NA	NA	grazed	0	0	0	0	0
NA	2015_02_04	2015_02_04_1_2	NA	NA	NA	NA	NA	NA	NA	NA	NA	NA	NA	NA	NA	NA	NA	NA	NA	NA	NA	NA	NA	NA	NA	NA	NA	NA	NA	NA	NA	NA	NA	NA	NA	NA	NA	NA	NA	NA	NA	NA	NA	avoided	0	0	0	0	0
NA	2015_02_04	2015_02_04_2_1	NA	NA	NA	NA	NA	NA	NA	NA	NA	NA	NA	NA	NA	NA	NA	NA	NA	NA	NA	NA	NA	NA	NA	NA	NA	NA	NA	NA	NA	NA	NA	NA	NA	NA	NA	NA	NA	NA	NA	NA	NA	grazed	0	0	0	0	0
NA	2015_02_04	2015_02_04_2_2	NA	NA	NA	NA	NA	NA	NA	NA	NA	NA	NA	NA	NA	NA	NA	NA	NA	NA	NA	NA	NA	NA	NA	NA	NA	NA	NA	NA	NA	NA	NA	NA	NA	NA	NA	NA	NA	NA	NA	NA	NA	avoided	0	0	0	0	0
NA	2015_02_04	2015_02_04_3_1	NA	NA	NA	NA	NA	NA	NA	NA	NA	NA	NA	NA	NA	NA	NA	NA	NA	NA	NA	NA	NA	NA	NA	NA	NA	NA	NA	NA	NA	NA	NA	NA	NA	NA	NA	NA	NA	NA	NA	NA	NA	grazed	0	0	0	0	0
NA	2015_02_04	2015_02_04_3_2	NA	NA	NA	NA	NA	NA	NA	NA	NA	NA	NA	NA	NA	NA	NA	NA	NA	NA	NA	NA	NA	NA	NA	NA	NA	NA	NA	NA	NA	NA	NA	NA	NA	NA	NA	NA	NA	NA	NA	NA	NA	avoided	0	0	0	0	0
NA	2015_02_04	2015_02_04_4_1	NA	NA	NA	NA	NA	NA	NA	NA	NA	NA	NA	NA	NA	NA	NA	NA	NA	NA	NA	NA	NA	NA	NA	NA	NA	NA	NA	NA	NA	NA	NA	NA	NA	NA	NA	NA	NA	NA	NA	NA	NA	grazed	0	0	0	0	0
NA	2015_02_04	2015_02_04_4_2	NA	NA	NA	NA	NA	NA	NA	NA	NA	NA	NA	NA	NA	NA	NA	NA	NA	NA	NA	NA	NA	NA	NA	NA	NA	NA	NA	NA	NA	NA	NA	NA	NA	NA	NA	NA	NA	NA	NA	NA	NA	avoided	0	0	0	0	0
2015_03	2015_03_01	2015_03_01_1_1	FE	F	E	140.5	24.5	21	24.5	0.174377224	0.174377224	4	0	1	0	1	0	1	0	0	0	0	1	0.125	4.625	4.75	7	1	8	11	2	13	8.5	0	1	1	5	2	3	0.4	2	4	2	grazed	0	0	0	0	0
2015_03	2015_03_01	2015_03_01_1_2	FE	F	E	140.5	24.5	21	24.5	0.174377224	0.174377224	4	0	1	0	1	0	1	0	0	0	0	1	0.125	4.625	4.75	7	1	8	11	2	13	8.5	0	1	1	5	2	3	0.4	2	4	2	avoided	0	0	0	0	0
2015_03	2015_03_01	2015_03_01_2_1	FE	F	E	140.5	24.5	21	24.5	0.174377224	0.174377224	4	0	1	0	1	0	1	0	0	0	0	1	0.125	4.625	4.75	7	1	8	11	2	13	8.5	0	1	1	5	2	3	0.4	2	4	2	grazed	0	0	0	0	0
2015_03	2015_03_01	2015_03_01_2_2	FE	F	E	140.5	24.5	21	24.5	0.174377224	0.174377224	4	0	1	0	1	0	1	0	0	0	0	1	0.125	4.625	4.75	7	1	8	11	2	13	8.5	0	1	1	5	2	3	0.4	2	4	2	avoided	0	0	0	0	0
2015_03	2015_03_01	2015_03_01_3_1	FE	F	E	140.5	24.5	21	24.5	0.174377224	0.174377224	4	0	1	0	1	0	1	0	0	0	0	1	0.125	4.625	4.75	7	1	8	11	2	13	8.5	0	1	1	5	2	3	0.4	2	4	2	grazed	1	0	0	0	0
2015_03	2015_03_01	2015_03_01_3_2	FE	F	E	140.5	24.5	21	24.5	0.174377224	0.174377224	4	0	1	0	1	0	1	0	0	0	0	1	0.125	4.625	4.75	7	1	8	11	2	13	8.5	0	1	1	5	2	3	0.4	2	4	2	avoided	0	0	0	0	0
2015_03	2015_03_01	2015_03_01_4_1	FE	F	E	140.5	24.5	21	24.5	0.174377224	0.174377224	4	0	1	0	1	0	1	0	0	0	0	1	0.125	4.625	4.75	7	1	8	11	2	13	8.5	0	1	1	5	2	3	0.4	2	4	2	grazed	0	0	0	0	0
2015_03	2015_03_01	2015_03_01_4_2	FE	F	E	140.5	24.5	21	24.5	0.174377224	0.174377224	4	0	1	0	1	0	1	0	0	0	0	1	0.125	4.625	4.75	7	1	8	11	2	13	8.5	0	1	1	5	2	3	0.4	2	4	2	avoided	0	0	0	0	0
NA	2015_03_02	2015_03_02_1_1	NA	NA	NA	NA	NA	NA	NA	NA	NA	NA	NA	NA	NA	NA	NA	NA	NA	NA	NA	NA	NA	NA	NA	NA	NA	NA	NA	NA	NA	NA	NA	NA	NA	NA	NA	NA	NA	NA	NA	NA	NA	grazed	0	0	0	0	0
NA	2015_03_02	2015_03_02_1_2	NA	NA	NA	NA	NA	NA	NA	NA	NA	NA	NA	NA	NA	NA	NA	NA	NA	NA	NA	NA	NA	NA	NA	NA	NA	NA	NA	NA	NA	NA	NA	NA	NA	NA	NA	NA	NA	NA	NA	NA	NA	avoided	0	0	0	0	0
NA	2015_03_02	2015_03_02_2_1	NA	NA	NA	NA	NA	NA	NA	NA	NA	NA	NA	NA	NA	NA	NA	NA	NA	NA	NA	NA	NA	NA	NA	NA	NA	NA	NA	NA	NA	NA	NA	NA	NA	NA	NA	NA	NA	NA	NA	NA	NA	grazed	0	0	0	0	0
NA	2015_03_02	2015_03_02_2_2	NA	NA	NA	NA	NA	NA	NA	NA	NA	NA	NA	NA	NA	NA	NA	NA	NA	NA	NA	NA	NA	NA	NA	NA	NA	NA	NA	NA	NA	NA	NA	NA	NA	NA	NA	NA	NA	NA	NA	NA	NA	avoided	0	0	0	0	0
NA	2015_03_02	2015_03_02_3_1	NA	NA	NA	NA	NA	NA	NA	NA	NA	NA	NA	NA	NA	NA	NA	NA	NA	NA	NA	NA	NA	NA	NA	NA	NA	NA	NA	NA	NA	NA	NA	NA	NA	NA	NA	NA	NA	NA	NA	NA	NA	grazed	0	0	0	0	0
NA	2015_03_02	2015_03_02_3_2	NA	NA	NA	NA	NA	NA	NA	NA	NA	NA	NA	NA	NA	NA	NA	NA	NA	NA	NA	NA	NA	NA	NA	NA	NA	NA	NA	NA	NA	NA	NA	NA	NA	NA	NA	NA	NA	NA	NA	NA	NA	avoided	0	0	0	0	0
NA	2015_03_02	2015_03_02_4_1	NA	NA	NA	NA	NA	NA	NA	NA	NA	NA	NA	NA	NA	NA	NA	NA	NA	NA	NA	NA	NA	NA	NA	NA	NA	NA	NA	NA	NA	NA	NA	NA	NA	NA	NA	NA	NA	NA	NA	NA	NA	grazed	0	0	0	0	0
NA	2015_03_02	2015_03_02_4_2	NA	NA	NA	NA	NA	NA	NA	NA	NA	NA	NA	NA	NA	NA	NA	NA	NA	NA	NA	NA	NA	NA	NA	NA	NA	NA	NA	NA	NA	NA	NA	NA	NA	NA	NA	NA	NA	NA	NA	NA	NA	avoided	0	0	0	0	0
NA	2015_03_03	2015_03_03_1_1	NA	NA	NA	NA	NA	NA	NA	NA	NA	NA	NA	NA	NA	NA	NA	NA	NA	NA	NA	NA	NA	NA	NA	NA	NA	NA	NA	NA	NA	NA	NA	NA	NA	NA	NA	NA	NA	NA	NA	NA	NA	grazed	0	0	0	0	0
NA	2015_03_03	2015_03_03_1_2	NA	NA	NA	NA	NA	NA	NA	NA	NA	NA	NA	NA	NA	NA	NA	NA	NA	NA	NA	NA	NA	NA	NA	NA	NA	NA	NA	NA	NA	NA	NA	NA	NA	NA	NA	NA	NA	NA	NA	NA	NA	avoided	0	0	0	0	0
NA	2015_03_03	2015_03_03_2_1	NA	NA	NA	NA	NA	NA	NA	NA	NA	NA	NA	NA	NA	NA	NA	NA	NA	NA	NA	NA	NA	NA	NA	NA	NA	NA	NA	NA	NA	NA	NA	NA	NA	NA	NA	NA	NA	NA	NA	NA	NA	grazed	0	0	0	0	0
NA	2015_03_03	2015_03_03_2_2	NA	NA	NA	NA	NA	NA	NA	NA	NA	NA	NA	NA	NA	NA	NA	NA	NA	NA	NA	NA	NA	NA	NA	NA	NA	NA	NA	NA	NA	NA	NA	NA	NA	NA	NA	NA	NA	NA	NA	NA	NA	avoided	0	0	0	0	0
NA	2015_03_03	2015_03_03_3_1	NA	NA	NA	NA	NA	NA	NA	NA	NA	NA	NA	NA	NA	NA	NA	NA	NA	NA	NA	NA	NA	NA	NA	NA	NA	NA	NA	NA	NA	NA	NA	NA	NA	NA	NA	NA	NA	NA	NA	NA	NA	grazed	0	0	0	0	0
NA	2015_03_03	2015_03_03_3_2	NA	NA	NA	NA	NA	NA	NA	NA	NA	NA	NA	NA	NA	NA	NA	NA	NA	NA	NA	NA	NA	NA	NA	NA	NA	NA	NA	NA	NA	NA	NA	NA	NA	NA	NA	NA	NA	NA	NA	NA	NA	avoided	0	0	0	0	0
NA	2015_03_03	2015_03_03_4_1	NA	NA	NA	NA	NA	NA	NA	NA	NA	NA	NA	NA	NA	NA	NA	NA	NA	NA	NA	NA	NA	NA	NA	NA	NA	NA	NA	NA	NA	NA	NA	NA	NA	NA	NA	NA	NA	NA	NA	NA	NA	grazed	0	0	0	0	0
NA	2015_03_03	2015_03_03_4_2	NA	NA	NA	NA	NA	NA	NA	NA	NA	NA	NA	NA	NA	NA	NA	NA	NA	NA	NA	NA	NA	NA	NA	NA	NA	NA	NA	NA	NA	NA	NA	NA	NA	NA	NA	NA	NA	NA	NA	NA	NA	avoided	0	0	0	0	0
NA	2015_03_04	2015_03_04_1_1	NA	NA	NA	NA	NA	NA	NA	NA	NA	NA	NA	NA	NA	NA	NA	NA	NA	NA	NA	NA	NA	NA	NA	NA	NA	NA	NA	NA	NA	NA	NA	NA	NA	NA	NA	NA	NA	NA	NA	NA	NA	grazed	0	0	0	0	0
NA	2015_03_04	2015_03_04_1_2	NA	NA	NA	NA	NA	NA	NA	NA	NA	NA	NA	NA	NA	NA	NA	NA	NA	NA	NA	NA	NA	NA	NA	NA	NA	NA	NA	NA	NA	NA	NA	NA	NA	NA	NA	NA	NA	NA	NA	NA	NA	avoided	0	0	0	0	0
NA	2015_03_04	2015_03_04_2_1	NA	NA	NA	NA	NA	NA	NA	NA	NA	NA	NA	NA	NA	NA	NA	NA	NA	NA	NA	NA	NA	NA	NA	NA	NA	NA	NA	NA	NA	NA	NA	NA	NA	NA	NA	NA	NA	NA	NA	NA	NA	grazed	0	0	0	0	0
NA	2015_03_04	2015_03_04_2_2	NA	NA	NA	NA	NA	NA	NA	NA	NA	NA	NA	NA	NA	NA	NA	NA	NA	NA	NA	NA	NA	NA	NA	NA	NA	NA	NA	NA	NA	NA	NA	NA	NA	NA	NA	NA	NA	NA	NA	NA	NA	avoided	0	0	0	0	0
NA	2015_03_04	2015_03_04_3_1	NA	NA	NA	NA	NA	NA	NA	NA	NA	NA	NA	NA	NA	NA	NA	NA	NA	NA	NA	NA	NA	NA	NA	NA	NA	NA	NA	NA	NA	NA	NA	NA	NA	NA	NA	NA	NA	NA	NA	NA	NA	grazed	0	0	0	0	0
NA	2015_03_04	2015_03_04_3_2	NA	NA	NA	NA	NA	NA	NA	NA	NA	NA	NA	NA	NA	NA	NA	NA	NA	NA	NA	NA	NA	NA	NA	NA	NA	NA	NA	NA	NA	NA	NA	NA	NA	NA	NA	NA	NA	NA	NA	NA	NA	avoided	0	0	0	0	0
NA	2015_03_04	2015_03_04_4_1	NA	NA	NA	NA	NA	NA	NA	NA	NA	NA	NA	NA	NA	NA	NA	NA	NA	NA	NA	NA	NA	NA	NA	NA	NA	NA	NA	NA	NA	NA	NA	NA	NA	NA	NA	NA	NA	NA	NA	NA	NA	grazed	0	0	0	0	0
NA	2015_03_04	2015_03_04_4_2	NA	NA	NA	NA	NA	NA	NA	NA	NA	NA	NA	NA	NA	NA	NA	NA	NA	NA	NA	NA	NA	NA	NA	NA	NA	NA	NA	NA	NA	NA	NA	NA	NA	NA	NA	NA	NA	NA	NA	NA	NA	avoided	0	0	0	0	0
NA	2015_04_01	2015_04_01_1_1	NA	NA	NA	NA	NA	NA	NA	NA	NA	NA	NA	NA	NA	NA	NA	NA	NA	NA	NA	NA	NA	NA	NA	NA	NA	NA	NA	NA	NA	NA	NA	NA	NA	NA	NA	NA	NA	NA	NA	NA	NA	grazed	0	0	0	0	0
NA	2015_04_01	2015_04_01_1_2	NA	NA	NA	NA	NA	NA	NA	NA	NA	NA	NA	NA	NA	NA	NA	NA	NA	NA	NA	NA	NA	NA	NA	NA	NA	NA	NA	NA	NA	NA	NA	NA	NA	NA	NA	NA	NA	NA	NA	NA	NA	avoided	0	0	0	0	0
NA	2015_04_01	2015_04_01_2_1	NA	NA	NA	NA	NA	NA	NA	NA	NA	NA	NA	NA	NA	NA	NA	NA	NA	NA	NA	NA	NA	NA	NA	NA	NA	NA	NA	NA	NA	NA	NA	NA	NA	NA	NA	NA	NA	NA	NA	NA	NA	grazed	0	0	0	0	0
NA	2015_04_01	2015_04_01_2_2	NA	NA	NA	NA	NA	NA	NA	NA	NA	NA	NA	NA	NA	NA	NA	NA	NA	NA	NA	NA	NA	NA	NA	NA	NA	NA	NA	NA	NA	NA	NA	NA	NA	NA	NA	NA	NA	NA	NA	NA	NA	avoided	0	0	0	0	0
NA	2015_04_01	2015_04_01_3_1	NA	NA	NA	NA	NA	NA	NA	NA	NA	NA	NA	NA	NA	NA	NA	NA	NA	NA	NA	NA	NA	NA	NA	NA	NA	NA	NA	NA	NA	NA	NA	NA	NA	NA	NA	NA	NA	NA	NA	NA	NA	grazed	0	0	0	0	0
NA	2015_04_01	2015_04_01_3_2	NA	NA	NA	NA	NA	NA	NA	NA	NA	NA	NA	NA	NA	NA	NA	NA	NA	NA	NA	NA	NA	NA	NA	NA	NA	NA	NA	NA	NA	NA	NA	NA	NA	NA	NA	NA	NA	NA	NA	NA	NA	avoided	0	0	0	0	0
NA	2015_04_01	2015_04_01_4_1	NA	NA	NA	NA	NA	NA	NA	NA	NA	NA	NA	NA	NA	NA	NA	NA	NA	NA	NA	NA	NA	NA	NA	NA	NA	NA	NA	NA	NA	NA	NA	NA	NA	NA	NA	NA	NA	NA	NA	NA	NA	grazed	0	0	0	0	0
NA	2015_04_01	2015_04_01_4_2	NA	NA	NA	NA	NA	NA	NA	NA	NA	NA	NA	NA	NA	NA	NA	NA	NA	NA	NA	NA	NA	NA	NA	NA	NA	NA	NA	NA	NA	NA	NA	NA	NA	NA	NA	NA	NA	NA	NA	NA	NA	avoided	0	0	0	0	0
2015_04	2015_04_02	2015_04_02_1_1	FE	F	E	125	75	72	75	0.6	0.6	3.5	0	1	1	0	1	1	1	0	1	1	1	5.25	0	5.25	6	0	6	15	4	19	8.75	0	1	1	5	2	3	0.5	1	3	2	grazed	0	0	0	0	0
2015_04	2015_04_02	2015_04_02_1_2	FE	F	E	125	75	72	75	0.6	0.6	3.5	0	1	1	0	1	1	1	0	1	1	1	5.25	0	5.25	6	0	6	15	4	19	8.75	0	1	1	5	2	3	0.5	1	3	2	avoided	0	0	0	0	0
2015_04	2015_04_02	2015_04_02_2_1	FE	F	E	125	75	72	75	0.6	0.6	3.5	0	1	1	0	1	1	1	0	1	1	1	5.25	0	5.25	6	0	6	15	4	19	8.75	0	1	1	5	2	3	0.5	1	3	2	grazed	0	0	0	0	0
2015_04	2015_04_02	2015_04_02_2_2	FE	F	E	125	75	72	75	0.6	0.6	3.5	0	1	1	0	1	1	1	0	1	1	1	5.25	0	5.25	6	0	6	15	4	19	8.75	0	1	1	5	2	3	0.5	1	3	2	avoided	0	0	0	0	0
2015_04	2015_04_02	2015_04_02_3_1	FE	F	E	125	75	72	75	0.6	0.6	3.5	0	1	1	0	1	1	1	0	1	1	1	5.25	0	5.25	6	0	6	15	4	19	8.75	0	1	1	5	2	3	0.5	1	3	2	grazed	0	0	0	0	0
2015_04	2015_04_02	2015_04_02_3_2	FE	F	E	125	75	72	75	0.6	0.6	3.5	0	1	1	0	1	1	1	0	1	1	1	5.25	0	5.25	6	0	6	15	4	19	8.75	0	1	1	5	2	3	0.5	1	3	2	avoided	0	0	0	0	0
2015_04	2015_04_02	2015_04_02_4_1	FE	F	E	125	75	72	75	0.6	0.6	3.5	0	1	1	0	1	1	1	0	1	1	1	5.25	0	5.25	6	0	6	15	4	19	8.75	0	1	1	5	2	3	0.5	1	3	2	grazed	0	0	0	0	0
2015_04	2015_04_02	2015_04_02_4_2	FE	F	E	125	75	72	75	0.6	0.6	3.5	0	1	1	0	1	1	1	0	1	1	1	5.25	0	5.25	6	0	6	15	4	19	8.75	0	1	1	5	2	3	0.5	1	3	2	avoided	0	0	0	0	0
2015_04	2015_04_03	2015_04_03_1_1	FE	F	E	125	75	72	75	0.6	0.6	3.5	0	1	1	0	0	1	1	0	0	0	1	17.125	4.5	21.625	12	4	16	15	4	19	8.75	1	0	1	5	4	1	0.476190476	4	7	5	grazed	1	0	0	0	0
2015_04	2015_04_03	2015_04_03_1_2	FE	F	E	125	75	72	75	0.6	0.6	3.5	0	1	1	0	0	1	1	0	0	0	1	17.125	4.5	21.625	12	4	16	15	4	19	8.75	1	0	1	5	4	1	0.476190476	4	7	5	avoided	1	0	0	0	0
2015_04	2015_04_03	2015_04_03_2_1	FE	F	E	125	75	72	75	0.6	0.6	3.5	0	1	1	0	0	1	1	0	0	0	1	17.125	4.5	21.625	12	4	16	15	4	19	8.75	1	0	1	5	4	1	0.476190476	4	7	5	grazed	0	0	0	0	0
2015_04	2015_04_03	2015_04_03_2_2	FE	F	E	125	75	72	75	0.6	0.6	3.5	0	1	1	0	0	1	1	0	0	0	1	17.125	4.5	21.625	12	4	16	15	4	19	8.75	1	0	1	5	4	1	0.476190476	4	7	5	avoided	0	0	0	0	0
2015_04	2015_04_03	2015_04_03_3_1	FE	F	E	125	75	72	75	0.6	0.6	3.5	0	1	1	0	0	1	1	0	0	0	1	17.125	4.5	21.625	12	4	16	15	4	19	8.75	1	0	1	5	4	1	0.476190476	4	7	5	grazed	0	0	0	0	0
2015_04	2015_04_03	2015_04_03_3_2	FE	F	E	125	75	72	75	0.6	0.6	3.5	0	1	1	0	0	1	1	0	0	0	1	17.125	4.5	21.625	12	4	16	15	4	19	8.75	1	0	1	5	4	1	0.476190476	4	7	5	avoided	1	0	0	0	0
2015_04	2015_04_03	2015_04_03_4_1	FE	F	E	125	75	72	75	0.6	0.6	3.5	0	1	1	0	0	1	1	0	0	0	1	17.125	4.5	21.625	12	4	16	15	4	19	8.75	1	0	1	5	4	1	0.476190476	4	7	5	grazed	0	0	0	0	0
2015_04	2015_04_03	2015_04_03_4_2	FE	F	E	125	75	72	75	0.6	0.6	3.5	0	1	1	0	0	1	1	0	0	0	1	17.125	4.5	21.625	12	4	16	15	4	19	8.75	1	0	1	5	4	1	0.476190476	4	7	5	avoided	0	0	0	0	0
2015_04	2015_04_04	2015_04_04_1_1	FE	F	E	125	75	72	75	0.6	0.6	3.5	0	1	1	0	0	1	1	0	0	0	1	22.875	2.75	25.625	12	2	14	15	4	19	8.75	0	1	1	5	4	1	0.6	2	6	6	grazed	0	0	0	0	0
2015_04	2015_04_04	2015_04_04_1_2	FE	F	E	125	75	72	75	0.6	0.6	3.5	0	1	1	0	0	1	1	0	0	0	1	22.875	2.75	25.625	12	2	14	15	4	19	8.75	0	1	1	5	4	1	0.6	2	6	6	avoided	1	0	0	0	0
2015_04	2015_04_04	2015_04_04_2_1	FE	F	E	125	75	72	75	0.6	0.6	3.5	0	1	1	0	0	1	1	0	0	0	1	22.875	2.75	25.625	12	2	14	15	4	19	8.75	0	1	1	5	4	1	0.6	2	6	6	grazed	0	0	0	0	0
2015_04	2015_04_04	2015_04_04_2_2	FE	F	E	125	75	72	75	0.6	0.6	3.5	0	1	1	0	0	1	1	0	0	0	1	22.875	2.75	25.625	12	2	14	15	4	19	8.75	0	1	1	5	4	1	0.6	2	6	6	avoided	0	0	0	0	0
2015_04	2015_04_04	2015_04_04_3_1	FE	F	E	125	75	72	75	0.6	0.6	3.5	0	1	1	0	0	1	1	0	0	0	1	22.875	2.75	25.625	12	2	14	15	4	19	8.75	0	1	1	5	4	1	0.6	2	6	6	grazed	0	0	0	0	0
2015_04	2015_04_04	2015_04_04_3_2	FE	F	E	125	75	72	75	0.6	0.6	3.5	0	1	1	0	0	1	1	0	0	0	1	22.875	2.75	25.625	12	2	14	15	4	19	8.75	0	1	1	5	4	1	0.6	2	6	6	avoided	1	0	0	0	0
2015_04	2015_04_04	2015_04_04_4_1	FE	F	E	125	75	72	75	0.6	0.6	3.5	0	1	1	0	0	1	1	0	0	0	1	22.875	2.75	25.625	12	2	14	15	4	19	8.75	0	1	1	5	4	1	0.6	2	6	6	grazed	0	0	0	0	0
2015_04	2015_04_04	2015_04_04_4_2	FE	F	E	125	75	72	75	0.6	0.6	3.5	0	1	1	0	0	1	1	0	0	0	1	22.875	2.75	25.625	12	2	14	15	4	19	8.75	0	1	1	5	4	1	0.6	2	6	6	avoided	1	0	0	0	0
NA	2015_05_01	2015_05_01_1_1	NA	NA	NA	NA	NA	NA	NA	NA	NA	NA	NA	NA	NA	NA	NA	NA	NA	NA	NA	NA	NA	NA	NA	NA	NA	NA	NA	NA	NA	NA	NA	NA	NA	NA	NA	NA	NA	NA	NA	NA	NA	grazed	0	0	0	0	0
NA	2015_05_01	2015_05_01_1_2	NA	NA	NA	NA	NA	NA	NA	NA	NA	NA	NA	NA	NA	NA	NA	NA	NA	NA	NA	NA	NA	NA	NA	NA	NA	NA	NA	NA	NA	NA	NA	NA	NA	NA	NA	NA	NA	NA	NA	NA	NA	avoided	0	0	0	0	0
NA	2015_05_01	2015_05_01_2_1	NA	NA	NA	NA	NA	NA	NA	NA	NA	NA	NA	NA	NA	NA	NA	NA	NA	NA	NA	NA	NA	NA	NA	NA	NA	NA	NA	NA	NA	NA	NA	NA	NA	NA	NA	NA	NA	NA	NA	NA	NA	grazed	0	0	0	0	0
NA	2015_05_01	2015_05_01_2_2	NA	NA	NA	NA	NA	NA	NA	NA	NA	NA	NA	NA	NA	NA	NA	NA	NA	NA	NA	NA	NA	NA	NA	NA	NA	NA	NA	NA	NA	NA	NA	NA	NA	NA	NA	NA	NA	NA	NA	NA	NA	avoided	0	0	0	0	0
NA	2015_05_01	2015_05_01_3_1	NA	NA	NA	NA	NA	NA	NA	NA	NA	NA	NA	NA	NA	NA	NA	NA	NA	NA	NA	NA	NA	NA	NA	NA	NA	NA	NA	NA	NA	NA	NA	NA	NA	NA	NA	NA	NA	NA	NA	NA	NA	grazed	0	0	0	0	0
NA	2015_05_01	2015_05_01_3_2	NA	NA	NA	NA	NA	NA	NA	NA	NA	NA	NA	NA	NA	NA	NA	NA	NA	NA	NA	NA	NA	NA	NA	NA	NA	NA	NA	NA	NA	NA	NA	NA	NA	NA	NA	NA	NA	NA	NA	NA	NA	avoided	0	0	0	0	0
NA	2015_05_01	2015_05_01_4_1	NA	NA	NA	NA	NA	NA	NA	NA	NA	NA	NA	NA	NA	NA	NA	NA	NA	NA	NA	NA	NA	NA	NA	NA	NA	NA	NA	NA	NA	NA	NA	NA	NA	NA	NA	NA	NA	NA	NA	NA	NA	grazed	0	0	0	0	0
NA	2015_05_01	2015_05_01_4_2	NA	NA	NA	NA	NA	NA	NA	NA	NA	NA	NA	NA	NA	NA	NA	NA	NA	NA	NA	NA	NA	NA	NA	NA	NA	NA	NA	NA	NA	NA	NA	NA	NA	NA	NA	NA	NA	NA	NA	NA	NA	avoided	0	0	0	0	0
NA	2015_05_02	2015_05_02_1_1	NA	NA	NA	NA	NA	NA	NA	NA	NA	NA	NA	NA	NA	NA	NA	NA	NA	NA	NA	NA	NA	NA	NA	NA	NA	NA	NA	NA	NA	NA	NA	NA	NA	NA	NA	NA	NA	NA	NA	NA	NA	grazed	0	0	0	0	0
NA	2015_05_02	2015_05_02_1_2	NA	NA	NA	NA	NA	NA	NA	NA	NA	NA	NA	NA	NA	NA	NA	NA	NA	NA	NA	NA	NA	NA	NA	NA	NA	NA	NA	NA	NA	NA	NA	NA	NA	NA	NA	NA	NA	NA	NA	NA	NA	avoided	0	0	0	0	0
NA	2015_05_02	2015_05_02_2_1	NA	NA	NA	NA	NA	NA	NA	NA	NA	NA	NA	NA	NA	NA	NA	NA	NA	NA	NA	NA	NA	NA	NA	NA	NA	NA	NA	NA	NA	NA	NA	NA	NA	NA	NA	NA	NA	NA	NA	NA	NA	grazed	0	0	0	0	0
NA	2015_05_02	2015_05_02_2_2	NA	NA	NA	NA	NA	NA	NA	NA	NA	NA	NA	NA	NA	NA	NA	NA	NA	NA	NA	NA	NA	NA	NA	NA	NA	NA	NA	NA	NA	NA	NA	NA	NA	NA	NA	NA	NA	NA	NA	NA	NA	avoided	0	0	0	0	0
NA	2015_05_02	2015_05_02_3_1	NA	NA	NA	NA	NA	NA	NA	NA	NA	NA	NA	NA	NA	NA	NA	NA	NA	NA	NA	NA	NA	NA	NA	NA	NA	NA	NA	NA	NA	NA	NA	NA	NA	NA	NA	NA	NA	NA	NA	NA	NA	grazed	0	0	0	0	0
NA	2015_05_02	2015_05_02_3_2	NA	NA	NA	NA	NA	NA	NA	NA	NA	NA	NA	NA	NA	NA	NA	NA	NA	NA	NA	NA	NA	NA	NA	NA	NA	NA	NA	NA	NA	NA	NA	NA	NA	NA	NA	NA	NA	NA	NA	NA	NA	avoided	0	0	0	0	0
NA	2015_05_02	2015_05_02_4_1	NA	NA	NA	NA	NA	NA	NA	NA	NA	NA	NA	NA	NA	NA	NA	NA	NA	NA	NA	NA	NA	NA	NA	NA	NA	NA	NA	NA	NA	NA	NA	NA	NA	NA	NA	NA	NA	NA	NA	NA	NA	grazed	0	0	0	0	0
NA	2015_05_02	2015_05_02_4_2	NA	NA	NA	NA	NA	NA	NA	NA	NA	NA	NA	NA	NA	NA	NA	NA	NA	NA	NA	NA	NA	NA	NA	NA	NA	NA	NA	NA	NA	NA	NA	NA	NA	NA	NA	NA	NA	NA	NA	NA	NA	avoided	0	0	0	0	0
2015_05	2015_05_03	2015_05_03_1_1	P_WE	P	WE	4.8	4.8	6.6	4.8	1	1	2	0	0	1	1	0	1	0	0	0	0	0	31.875	3.75	35.625	7	2	9	16	3	19	11.25	4	1	5	6	4	2	0.363636364	4	3	2	grazed	0	0	0	0	0
2015_05	2015_05_03	2015_05_03_1_2	P_WE	P	WE	4.8	4.8	6.6	4.8	1	1	2	0	0	1	1	0	1	0	0	0	0	0	31.875	3.75	35.625	7	2	9	16	3	19	11.25	4	1	5	6	4	2	0.363636364	4	3	2	avoided	0	0	0	0	0
2015_05	2015_05_03	2015_05_03_2_1	P_WE	P	WE	4.8	4.8	6.6	4.8	1	1	2	0	0	1	1	0	1	0	0	0	0	0	31.875	3.75	35.625	7	2	9	16	3	19	11.25	4	1	5	6	4	2	0.363636364	4	3	2	grazed	0	0	0	0	0
2015_05	2015_05_03	2015_05_03_2_2	P_WE	P	WE	4.8	4.8	6.6	4.8	1	1	2	0	0	1	1	0	1	0	0	0	0	0	31.875	3.75	35.625	7	2	9	16	3	19	11.25	4	1	5	6	4	2	0.363636364	4	3	2	avoided	0	0	0	0	0
2015_05	2015_05_03	2015_05_03_3_1	P_WE	P	WE	4.8	4.8	6.6	4.8	1	1	2	0	0	1	1	0	1	0	0	0	0	0	31.875	3.75	35.625	7	2	9	16	3	19	11.25	4	1	5	6	4	2	0.363636364	4	3	2	grazed	0	0	0	0	0
2015_05	2015_05_03	2015_05_03_3_2	P_WE	P	WE	4.8	4.8	6.6	4.8	1	1	2	0	0	1	1	0	1	0	0	0	0	0	31.875	3.75	35.625	7	2	9	16	3	19	11.25	4	1	5	6	4	2	0.363636364	4	3	2	avoided	0	0	0	0	0
2015_05	2015_05_03	2015_05_03_4_1	P_WE	P	WE	4.8	4.8	6.6	4.8	1	1	2	0	0	1	1	0	1	0	0	0	0	0	31.875	3.75	35.625	7	2	9	16	3	19	11.25	4	1	5	6	4	2	0.363636364	4	3	2	grazed	0	0	0	0	0
2015_05	2015_05_03	2015_05_03_4_2	P_WE	P	WE	4.8	4.8	6.6	4.8	1	1	2	0	0	1	1	0	1	0	0	0	0	0	31.875	3.75	35.625	7	2	9	16	3	19	11.25	4	1	5	6	4	2	0.363636364	4	3	2	avoided	0	0	0	0	0
2015_05	2015_05_04	2015_05_04_1_1	P_WE	P	WE	4.8	4.8	6.6	4.8	1	1	2	0	0	0	1	0	1	0	0	0	0	0	36.625	4	40.625	8	2	10	16	3	19	11.25	2	3	5	6	3	3	0.823529412	2	1	7	grazed	0	0	0	0	0
2015_05	2015_05_04	2015_05_04_1_2	P_WE	P	WE	4.8	4.8	6.6	4.8	1	1	2	0	0	0	1	0	1	0	0	0	0	0	36.625	4	40.625	8	2	10	16	3	19	11.25	2	3	5	6	3	3	0.823529412	2	1	7	avoided	0	0	0	0	0
2015_05	2015_05_04	2015_05_04_2_1	P_WE	P	WE	4.8	4.8	6.6	4.8	1	1	2	0	0	0	1	0	1	0	0	0	0	0	36.625	4	40.625	8	2	10	16	3	19	11.25	2	3	5	6	3	3	0.823529412	2	1	7	grazed	0	0	0	0	0
2015_05	2015_05_04	2015_05_04_2_2	P_WE	P	WE	4.8	4.8	6.6	4.8	1	1	2	0	0	0	1	0	1	0	0	0	0	0	36.625	4	40.625	8	2	10	16	3	19	11.25	2	3	5	6	3	3	0.823529412	2	1	7	avoided	0	0	0	0	0
2015_05	2015_05_04	2015_05_04_3_1	P_WE	P	WE	4.8	4.8	6.6	4.8	1	1	2	0	0	0	1	0	1	0	0	0	0	0	36.625	4	40.625	8	2	10	16	3	19	11.25	2	3	5	6	3	3	0.823529412	2	1	7	grazed	0	0	0	0	0
2015_05	2015_05_04	2015_05_04_3_2	P_WE	P	WE	4.8	4.8	6.6	4.8	1	1	2	0	0	0	1	0	1	0	0	0	0	0	36.625	4	40.625	8	2	10	16	3	19	11.25	2	3	5	6	3	3	0.823529412	2	1	7	avoided	0	0	0	0	0
2015_05	2015_05_04	2015_05_04_4_1	P_WE	P	WE	4.8	4.8	6.6	4.8	1	1	2	0	0	0	1	0	1	0	0	0	0	0	36.625	4	40.625	8	2	10	16	3	19	11.25	2	3	5	6	3	3	0.823529412	2	1	7	grazed	0	0	0	0	0
2015_05	2015_05_04	2015_05_04_4_2	P_WE	P	WE	4.8	4.8	6.6	4.8	1	1	2	0	0	0	1	0	1	0	0	0	0	0	36.625	4	40.625	8	2	10	16	3	19	11.25	2	3	5	6	3	3	0.823529412	2	1	7	avoided	0	0	0	0	0
2015_06	2015_06_01	2015_06_01_1_1	FE	F	E	61	43	8	20	0.704918033	0.327868852	2	0	1	1	1	1	1	0	0	0	1	0	7	1.75	8.75	4	1	5	8	1	9	3.25	0	2	2	4	1	3	0.75	1	1	3	grazed	0	0	0	0	0
2015_06	2015_06_01	2015_06_01_1_2	FE	F	E	61	43	8	20	0.704918033	0.327868852	2	0	1	1	1	1	1	0	0	0	1	0	7	1.75	8.75	4	1	5	8	1	9	3.25	0	2	2	4	1	3	0.75	1	1	3	avoided	0	0	0	0	0
2015_06	2015_06_01	2015_06_01_2_1	FE	F	E	61	43	8	20	0.704918033	0.327868852	2	0	1	1	1	1	1	0	0	0	1	0	7	1.75	8.75	4	1	5	8	1	9	3.25	0	2	2	4	1	3	0.75	1	1	3	grazed	0	0	0	0	0
2015_06	2015_06_01	2015_06_01_2_2	FE	F	E	61	43	8	20	0.704918033	0.327868852	2	0	1	1	1	1	1	0	0	0	1	0	7	1.75	8.75	4	1	5	8	1	9	3.25	0	2	2	4	1	3	0.75	1	1	3	avoided	0	0	0	0	0
2015_06	2015_06_01	2015_06_01_3_1	FE	F	E	61	43	8	20	0.704918033	0.327868852	2	0	1	1	1	1	1	0	0	0	1	0	7	1.75	8.75	4	1	5	8	1	9	3.25	0	2	2	4	1	3	0.75	1	1	3	grazed	0	0	0	0	0
2015_06	2015_06_01	2015_06_01_3_2	FE	F	E	61	43	8	20	0.704918033	0.327868852	2	0	1	1	1	1	1	0	0	0	1	0	7	1.75	8.75	4	1	5	8	1	9	3.25	0	2	2	4	1	3	0.75	1	1	3	avoided	0	0	0	0	0
2015_06	2015_06_01	2015_06_01_4_1	FE	F	E	61	43	8	20	0.704918033	0.327868852	2	0	1	1	1	1	1	0	0	0	1	0	7	1.75	8.75	4	1	5	8	1	9	3.25	0	2	2	4	1	3	0.75	1	1	3	grazed	0	0	0	0	0
2015_06	2015_06_01	2015_06_01_4_2	FE	F	E	61	43	8	20	0.704918033	0.327868852	2	0	1	1	1	1	1	0	0	0	1	0	7	1.75	8.75	4	1	5	8	1	9	3.25	0	2	2	4	1	3	0.75	1	1	3	avoided	0	0	0	0	0
NA	2015_06_02	2015_06_02_1_1	NA	NA	NA	NA	NA	NA	NA	NA	NA	NA	NA	NA	NA	NA	NA	NA	NA	NA	NA	NA	NA	NA	NA	NA	NA	NA	NA	NA	NA	NA	NA	NA	NA	NA	NA	NA	NA	NA	NA	NA	NA	grazed	0	0	0	0	0
NA	2015_06_02	2015_06_02_1_2	NA	NA	NA	NA	NA	NA	NA	NA	NA	NA	NA	NA	NA	NA	NA	NA	NA	NA	NA	NA	NA	NA	NA	NA	NA	NA	NA	NA	NA	NA	NA	NA	NA	NA	NA	NA	NA	NA	NA	NA	NA	avoided	0	0	0	0	0
NA	2015_06_02	2015_06_02_2_1	NA	NA	NA	NA	NA	NA	NA	NA	NA	NA	NA	NA	NA	NA	NA	NA	NA	NA	NA	NA	NA	NA	NA	NA	NA	NA	NA	NA	NA	NA	NA	NA	NA	NA	NA	NA	NA	NA	NA	NA	NA	grazed	0	0	0	0	0
NA	2015_06_02	2015_06_02_2_2	NA	NA	NA	NA	NA	NA	NA	NA	NA	NA	NA	NA	NA	NA	NA	NA	NA	NA	NA	NA	NA	NA	NA	NA	NA	NA	NA	NA	NA	NA	NA	NA	NA	NA	NA	NA	NA	NA	NA	NA	NA	avoided	0	0	0	0	0
NA	2015_06_02	2015_06_02_3_1	NA	NA	NA	NA	NA	NA	NA	NA	NA	NA	NA	NA	NA	NA	NA	NA	NA	NA	NA	NA	NA	NA	NA	NA	NA	NA	NA	NA	NA	NA	NA	NA	NA	NA	NA	NA	NA	NA	NA	NA	NA	grazed	0	0	0	0	0
NA	2015_06_02	2015_06_02_3_2	NA	NA	NA	NA	NA	NA	NA	NA	NA	NA	NA	NA	NA	NA	NA	NA	NA	NA	NA	NA	NA	NA	NA	NA	NA	NA	NA	NA	NA	NA	NA	NA	NA	NA	NA	NA	NA	NA	NA	NA	NA	avoided	0	0	0	0	0
NA	2015_06_02	2015_06_02_4_1	NA	NA	NA	NA	NA	NA	NA	NA	NA	NA	NA	NA	NA	NA	NA	NA	NA	NA	NA	NA	NA	NA	NA	NA	NA	NA	NA	NA	NA	NA	NA	NA	NA	NA	NA	NA	NA	NA	NA	NA	NA	grazed	0	0	0	0	0
NA	2015_06_02	2015_06_02_4_2	NA	NA	NA	NA	NA	NA	NA	NA	NA	NA	NA	NA	NA	NA	NA	NA	NA	NA	NA	NA	NA	NA	NA	NA	NA	NA	NA	NA	NA	NA	NA	NA	NA	NA	NA	NA	NA	NA	NA	NA	NA	avoided	0	0	0	0	0
NA	2015_06_03	2015_06_03_1_1	NA	NA	NA	NA	NA	NA	NA	NA	NA	NA	NA	NA	NA	NA	NA	NA	NA	NA	NA	NA	NA	NA	NA	NA	NA	NA	NA	NA	NA	NA	NA	NA	NA	NA	NA	NA	NA	NA	NA	NA	NA	grazed	0	0	0	0	0
NA	2015_06_03	2015_06_03_1_2	NA	NA	NA	NA	NA	NA	NA	NA	NA	NA	NA	NA	NA	NA	NA	NA	NA	NA	NA	NA	NA	NA	NA	NA	NA	NA	NA	NA	NA	NA	NA	NA	NA	NA	NA	NA	NA	NA	NA	NA	NA	avoided	0	0	0	0	0
NA	2015_06_03	2015_06_03_2_1	NA	NA	NA	NA	NA	NA	NA	NA	NA	NA	NA	NA	NA	NA	NA	NA	NA	NA	NA	NA	NA	NA	NA	NA	NA	NA	NA	NA	NA	NA	NA	NA	NA	NA	NA	NA	NA	NA	NA	NA	NA	grazed	0	0	0	0	0
NA	2015_06_03	2015_06_03_2_2	NA	NA	NA	NA	NA	NA	NA	NA	NA	NA	NA	NA	NA	NA	NA	NA	NA	NA	NA	NA	NA	NA	NA	NA	NA	NA	NA	NA	NA	NA	NA	NA	NA	NA	NA	NA	NA	NA	NA	NA	NA	avoided	0	0	0	0	0
NA	2015_06_03	2015_06_03_3_1	NA	NA	NA	NA	NA	NA	NA	NA	NA	NA	NA	NA	NA	NA	NA	NA	NA	NA	NA	NA	NA	NA	NA	NA	NA	NA	NA	NA	NA	NA	NA	NA	NA	NA	NA	NA	NA	NA	NA	NA	NA	grazed	0	0	0	0	0
NA	2015_06_03	2015_06_03_3_2	NA	NA	NA	NA	NA	NA	NA	NA	NA	NA	NA	NA	NA	NA	NA	NA	NA	NA	NA	NA	NA	NA	NA	NA	NA	NA	NA	NA	NA	NA	NA	NA	NA	NA	NA	NA	NA	NA	NA	NA	NA	avoided	0	0	0	0	0
NA	2015_06_03	2015_06_03_4_1	NA	NA	NA	NA	NA	NA	NA	NA	NA	NA	NA	NA	NA	NA	NA	NA	NA	NA	NA	NA	NA	NA	NA	NA	NA	NA	NA	NA	NA	NA	NA	NA	NA	NA	NA	NA	NA	NA	NA	NA	NA	grazed	0	0	0	0	0
NA	2015_06_03	2015_06_03_4_2	NA	NA	NA	NA	NA	NA	NA	NA	NA	NA	NA	NA	NA	NA	NA	NA	NA	NA	NA	NA	NA	NA	NA	NA	NA	NA	NA	NA	NA	NA	NA	NA	NA	NA	NA	NA	NA	NA	NA	NA	NA	avoided	0	0	0	0	0
NA	2015_06_04	2015_06_04_1_1	NA	NA	NA	NA	NA	NA	NA	NA	NA	NA	NA	NA	NA	NA	NA	NA	NA	NA	NA	NA	NA	NA	NA	NA	NA	NA	NA	NA	NA	NA	NA	NA	NA	NA	NA	NA	NA	NA	NA	NA	NA	grazed	0	0	0	0	0
NA	2015_06_04	2015_06_04_1_2	NA	NA	NA	NA	NA	NA	NA	NA	NA	NA	NA	NA	NA	NA	NA	NA	NA	NA	NA	NA	NA	NA	NA	NA	NA	NA	NA	NA	NA	NA	NA	NA	NA	NA	NA	NA	NA	NA	NA	NA	NA	avoided	0	0	0	0	0
NA	2015_06_04	2015_06_04_2_1	NA	NA	NA	NA	NA	NA	NA	NA	NA	NA	NA	NA	NA	NA	NA	NA	NA	NA	NA	NA	NA	NA	NA	NA	NA	NA	NA	NA	NA	NA	NA	NA	NA	NA	NA	NA	NA	NA	NA	NA	NA	grazed	0	0	0	0	0
NA	2015_06_04	2015_06_04_2_2	NA	NA	NA	NA	NA	NA	NA	NA	NA	NA	NA	NA	NA	NA	NA	NA	NA	NA	NA	NA	NA	NA	NA	NA	NA	NA	NA	NA	NA	NA	NA	NA	NA	NA	NA	NA	NA	NA	NA	NA	NA	avoided	0	0	0	0	0
NA	2015_06_04	2015_06_04_3_1	NA	NA	NA	NA	NA	NA	NA	NA	NA	NA	NA	NA	NA	NA	NA	NA	NA	NA	NA	NA	NA	NA	NA	NA	NA	NA	NA	NA	NA	NA	NA	NA	NA	NA	NA	NA	NA	NA	NA	NA	NA	grazed	0	0	0	0	0
NA	2015_06_04	2015_06_04_3_2	NA	NA	NA	NA	NA	NA	NA	NA	NA	NA	NA	NA	NA	NA	NA	NA	NA	NA	NA	NA	NA	NA	NA	NA	NA	NA	NA	NA	NA	NA	NA	NA	NA	NA	NA	NA	NA	NA	NA	NA	NA	avoided	0	0	0	0	0
NA	2015_06_04	2015_06_04_4_1	NA	NA	NA	NA	NA	NA	NA	NA	NA	NA	NA	NA	NA	NA	NA	NA	NA	NA	NA	NA	NA	NA	NA	NA	NA	NA	NA	NA	NA	NA	NA	NA	NA	NA	NA	NA	NA	NA	NA	NA	NA	grazed	0	0	0	0	0
NA	2015_06_04	2015_06_04_4_2	NA	NA	NA	NA	NA	NA	NA	NA	NA	NA	NA	NA	NA	NA	NA	NA	NA	NA	NA	NA	NA	NA	NA	NA	NA	NA	NA	NA	NA	NA	NA	NA	NA	NA	NA	NA	NA	NA	NA	NA	NA	avoided	0	0	0	0	0
2015_07	2015_07_01	2015_07_01_1_1	FE	F	E	210	90	23	45	0.428571429	0.214285714	3	0	0	0	0	0	1	0	0	0	0	0	21.625	3.25	24.875	12	1	13	15	1	16	7.5	2	0	2	8	7	1	0.631578947	1	6	6	grazed	0	0	0	0	0
2015_07	2015_07_01	2015_07_01_1_2	FE	F	E	210	90	23	45	0.428571429	0.214285714	3	0	0	0	0	0	1	0	0	0	0	0	21.625	3.25	24.875	12	1	13	15	1	16	7.5	2	0	2	8	7	1	0.631578947	1	6	6	avoided	1	0	0	0	0
2015_07	2015_07_01	2015_07_01_2_1	FE	F	E	210	90	23	45	0.428571429	0.214285714	3	0	0	0	0	0	1	0	0	0	0	0	21.625	3.25	24.875	12	1	13	15	1	16	7.5	2	0	2	8	7	1	0.631578947	1	6	6	grazed	0	0	0	0	0
2015_07	2015_07_01	2015_07_01_2_2	FE	F	E	210	90	23	45	0.428571429	0.214285714	3	0	0	0	0	0	1	0	0	0	0	0	21.625	3.25	24.875	12	1	13	15	1	16	7.5	2	0	2	8	7	1	0.631578947	1	6	6	avoided	0	0	0	0	0
2015_07	2015_07_01	2015_07_01_3_1	FE	F	E	210	90	23	45	0.428571429	0.214285714	3	0	0	0	0	0	1	0	0	0	0	0	21.625	3.25	24.875	12	1	13	15	1	16	7.5	2	0	2	8	7	1	0.631578947	1	6	6	grazed	0	0	0	0	0
2015_07	2015_07_01	2015_07_01_3_2	FE	F	E	210	90	23	45	0.428571429	0.214285714	3	0	0	0	0	0	1	0	0	0	0	0	21.625	3.25	24.875	12	1	13	15	1	16	7.5	2	0	2	8	7	1	0.631578947	1	6	6	avoided	0	0	0	0	0
2015_07	2015_07_01	2015_07_01_4_1	FE	F	E	210	90	23	45	0.428571429	0.214285714	3	0	0	0	0	0	1	0	0	0	0	0	21.625	3.25	24.875	12	1	13	15	1	16	7.5	2	0	2	8	7	1	0.631578947	1	6	6	grazed	0	0	0	0	0
2015_07	2015_07_01	2015_07_01_4_2	FE	F	E	210	90	23	45	0.428571429	0.214285714	3	0	0	0	0	0	1	0	0	0	0	0	21.625	3.25	24.875	12	1	13	15	1	16	7.5	2	0	2	8	7	1	0.631578947	1	6	6	avoided	0	0	0	0	0
2015_07	2015_07_02	2015_07_02_1_1	FE	F	E	210	90	23	45	0.428571429	0.214285714	3	0	0	0	0	0	1	0	0	0	0	0	5	5.125	10.125	5	1	6	15	1	16	7.5	1	1	2	8	4	4	0.5	3	1	2	grazed	0	0	0	0	0
2015_07	2015_07_02	2015_07_02_1_2	FE	F	E	210	90	23	45	0.428571429	0.214285714	3	0	0	0	0	0	1	0	0	0	0	0	5	5.125	10.125	5	1	6	15	1	16	7.5	1	1	2	8	4	4	0.5	3	1	2	avoided	0	0	0	0	0
2015_07	2015_07_02	2015_07_02_2_1	FE	F	E	210	90	23	45	0.428571429	0.214285714	3	0	0	0	0	0	1	0	0	0	0	0	5	5.125	10.125	5	1	6	15	1	16	7.5	1	1	2	8	4	4	0.5	3	1	2	grazed	0	0	0	0	0
2015_07	2015_07_02	2015_07_02_2_2	FE	F	E	210	90	23	45	0.428571429	0.214285714	3	0	0	0	0	0	1	0	0	0	0	0	5	5.125	10.125	5	1	6	15	1	16	7.5	1	1	2	8	4	4	0.5	3	1	2	avoided	0	0	0	0	0
2015_07	2015_07_02	2015_07_02_3_1	FE	F	E	210	90	23	45	0.428571429	0.214285714	3	0	0	0	0	0	1	0	0	0	0	0	5	5.125	10.125	5	1	6	15	1	16	7.5	1	1	2	8	4	4	0.5	3	1	2	grazed	0	0	0	0	0
2015_07	2015_07_02	2015_07_02_3_2	FE	F	E	210	90	23	45	0.428571429	0.214285714	3	0	0	0	0	0	1	0	0	0	0	0	5	5.125	10.125	5	1	6	15	1	16	7.5	1	1	2	8	4	4	0.5	3	1	2	avoided	0	0	0	0	0
2015_07	2015_07_02	2015_07_02_4_1	FE	F	E	210	90	23	45	0.428571429	0.214285714	3	0	0	0	0	0	1	0	0	0	0	0	5	5.125	10.125	5	1	6	15	1	16	7.5	1	1	2	8	4	4	0.5	3	1	2	grazed	0	0	0	0	0
2015_07	2015_07_02	2015_07_02_4_2	FE	F	E	210	90	23	45	0.428571429	0.214285714	3	0	0	0	0	0	1	0	0	0	0	0	5	5.125	10.125	5	1	6	15	1	16	7.5	1	1	2	8	4	4	0.5	3	1	2	avoided	0	0	0	0	0
2015_07	2015_07_03	2015_07_03_1_1	FE	F	E	210	90	23	45	0.428571429	0.214285714	3	0	0	0	0	0	1	0	0	0	0	0	9.375	1.25	10.625	7	1	8	15	1	16	7.5	1	1	2	8	4	4	0.4	1	5	2	grazed	0	0	0	0	0
2015_07	2015_07_03	2015_07_03_1_2	FE	F	E	210	90	23	45	0.428571429	0.214285714	3	0	0	0	0	0	1	0	0	0	0	0	9.375	1.25	10.625	7	1	8	15	1	16	7.5	1	1	2	8	4	4	0.4	1	5	2	avoided	0	0	0	0	0
2015_07	2015_07_03	2015_07_03_2_1	FE	F	E	210	90	23	45	0.428571429	0.214285714	3	0	0	0	0	0	1	0	0	0	0	0	9.375	1.25	10.625	7	1	8	15	1	16	7.5	1	1	2	8	4	4	0.4	1	5	2	grazed	0	0	0	0	0
2015_07	2015_07_03	2015_07_03_2_2	FE	F	E	210	90	23	45	0.428571429	0.214285714	3	0	0	0	0	0	1	0	0	0	0	0	9.375	1.25	10.625	7	1	8	15	1	16	7.5	1	1	2	8	4	4	0.4	1	5	2	avoided	0	0	0	0	0
2015_07	2015_07_03	2015_07_03_3_1	FE	F	E	210	90	23	45	0.428571429	0.214285714	3	0	0	0	0	0	1	0	0	0	0	0	9.375	1.25	10.625	7	1	8	15	1	16	7.5	1	1	2	8	4	4	0.4	1	5	2	grazed	0	0	0	0	0
2015_07	2015_07_03	2015_07_03_3_2	FE	F	E	210	90	23	45	0.428571429	0.214285714	3	0	0	0	0	0	1	0	0	0	0	0	9.375	1.25	10.625	7	1	8	15	1	16	7.5	1	1	2	8	4	4	0.4	1	5	2	avoided	0	0	0	0	0
2015_07	2015_07_03	2015_07_03_4_1	FE	F	E	210	90	23	45	0.428571429	0.214285714	3	0	0	0	0	0	1	0	0	0	0	0	9.375	1.25	10.625	7	1	8	15	1	16	7.5	1	1	2	8	4	4	0.4	1	5	2	grazed	0	0	0	0	0
2015_07	2015_07_03	2015_07_03_4_2	FE	F	E	210	90	23	45	0.428571429	0.214285714	3	0	0	0	0	0	1	0	0	0	0	0	9.375	1.25	10.625	7	1	8	15	1	16	7.5	1	1	2	8	4	4	0.4	1	5	2	avoided	0	0	0	0	0
NA	2015_07_04	2015_07_04_1_1	NA	NA	NA	NA	NA	NA	NA	NA	NA	NA	NA	NA	NA	NA	NA	NA	NA	NA	NA	NA	NA	NA	NA	NA	NA	NA	NA	NA	NA	NA	NA	NA	NA	NA	NA	NA	NA	NA	NA	NA	NA	grazed	0	0	0	0	0
NA	2015_07_04	2015_07_04_1_2	NA	NA	NA	NA	NA	NA	NA	NA	NA	NA	NA	NA	NA	NA	NA	NA	NA	NA	NA	NA	NA	NA	NA	NA	NA	NA	NA	NA	NA	NA	NA	NA	NA	NA	NA	NA	NA	NA	NA	NA	NA	avoided	0	0	0	0	0
NA	2015_07_04	2015_07_04_2_1	NA	NA	NA	NA	NA	NA	NA	NA	NA	NA	NA	NA	NA	NA	NA	NA	NA	NA	NA	NA	NA	NA	NA	NA	NA	NA	NA	NA	NA	NA	NA	NA	NA	NA	NA	NA	NA	NA	NA	NA	NA	grazed	0	0	0	0	0
NA	2015_07_04	2015_07_04_2_2	NA	NA	NA	NA	NA	NA	NA	NA	NA	NA	NA	NA	NA	NA	NA	NA	NA	NA	NA	NA	NA	NA	NA	NA	NA	NA	NA	NA	NA	NA	NA	NA	NA	NA	NA	NA	NA	NA	NA	NA	NA	avoided	0	0	0	0	0
NA	2015_07_04	2015_07_04_3_1	NA	NA	NA	NA	NA	NA	NA	NA	NA	NA	NA	NA	NA	NA	NA	NA	NA	NA	NA	NA	NA	NA	NA	NA	NA	NA	NA	NA	NA	NA	NA	NA	NA	NA	NA	NA	NA	NA	NA	NA	NA	grazed	0	0	0	0	0
NA	2015_07_04	2015_07_04_3_2	NA	NA	NA	NA	NA	NA	NA	NA	NA	NA	NA	NA	NA	NA	NA	NA	NA	NA	NA	NA	NA	NA	NA	NA	NA	NA	NA	NA	NA	NA	NA	NA	NA	NA	NA	NA	NA	NA	NA	NA	NA	avoided	0	0	0	0	0
NA	2015_07_04	2015_07_04_4_1	NA	NA	NA	NA	NA	NA	NA	NA	NA	NA	NA	NA	NA	NA	NA	NA	NA	NA	NA	NA	NA	NA	NA	NA	NA	NA	NA	NA	NA	NA	NA	NA	NA	NA	NA	NA	NA	NA	NA	NA	NA	grazed	0	0	0	0	0
NA	2015_07_04	2015_07_04_4_2	NA	NA	NA	NA	NA	NA	NA	NA	NA	NA	NA	NA	NA	NA	NA	NA	NA	NA	NA	NA	NA	NA	NA	NA	NA	NA	NA	NA	NA	NA	NA	NA	NA	NA	NA	NA	NA	NA	NA	NA	NA	avoided	0	0	0	0	0
NA	2015_08_01	2015_08_01_1_1	NA	NA	NA	NA	NA	NA	NA	NA	NA	NA	NA	NA	NA	NA	NA	NA	NA	NA	NA	NA	NA	NA	NA	NA	NA	NA	NA	NA	NA	NA	NA	NA	NA	NA	NA	NA	NA	NA	NA	NA	NA	grazed	0	0	0	0	0
NA	2015_08_01	2015_08_01_1_2	NA	NA	NA	NA	NA	NA	NA	NA	NA	NA	NA	NA	NA	NA	NA	NA	NA	NA	NA	NA	NA	NA	NA	NA	NA	NA	NA	NA	NA	NA	NA	NA	NA	NA	NA	NA	NA	NA	NA	NA	NA	avoided	0	0	0	0	0
NA	2015_08_01	2015_08_01_2_1	NA	NA	NA	NA	NA	NA	NA	NA	NA	NA	NA	NA	NA	NA	NA	NA	NA	NA	NA	NA	NA	NA	NA	NA	NA	NA	NA	NA	NA	NA	NA	NA	NA	NA	NA	NA	NA	NA	NA	NA	NA	grazed	0	0	0	0	0
NA	2015_08_01	2015_08_01_2_2	NA	NA	NA	NA	NA	NA	NA	NA	NA	NA	NA	NA	NA	NA	NA	NA	NA	NA	NA	NA	NA	NA	NA	NA	NA	NA	NA	NA	NA	NA	NA	NA	NA	NA	NA	NA	NA	NA	NA	NA	NA	avoided	0	0	0	0	0
NA	2015_08_01	2015_08_01_3_1	NA	NA	NA	NA	NA	NA	NA	NA	NA	NA	NA	NA	NA	NA	NA	NA	NA	NA	NA	NA	NA	NA	NA	NA	NA	NA	NA	NA	NA	NA	NA	NA	NA	NA	NA	NA	NA	NA	NA	NA	NA	grazed	0	0	0	0	0
NA	2015_08_01	2015_08_01_3_2	NA	NA	NA	NA	NA	NA	NA	NA	NA	NA	NA	NA	NA	NA	NA	NA	NA	NA	NA	NA	NA	NA	NA	NA	NA	NA	NA	NA	NA	NA	NA	NA	NA	NA	NA	NA	NA	NA	NA	NA	NA	avoided	0	0	0	0	0
NA	2015_08_01	2015_08_01_4_1	NA	NA	NA	NA	NA	NA	NA	NA	NA	NA	NA	NA	NA	NA	NA	NA	NA	NA	NA	NA	NA	NA	NA	NA	NA	NA	NA	NA	NA	NA	NA	NA	NA	NA	NA	NA	NA	NA	NA	NA	NA	grazed	0	0	0	0	0
NA	2015_08_01	2015_08_01_4_2	NA	NA	NA	NA	NA	NA	NA	NA	NA	NA	NA	NA	NA	NA	NA	NA	NA	NA	NA	NA	NA	NA	NA	NA	NA	NA	NA	NA	NA	NA	NA	NA	NA	NA	NA	NA	NA	NA	NA	NA	NA	avoided	0	0	0	0	0
2015_08	2015_08_02	2015_08_02_1_1	FE	F	E	120	65	100	65	0.541666667	0.541666667	3.5	0	1	0	1	0	1	0	0	0	1	0	17.75	4.375	22.125	8	1	9	11	1	12	5.25	0	0	0	5	4	1	0.363636364	4	3	2	grazed	0	0	0	0	0
2015_08	2015_08_02	2015_08_02_1_2	FE	F	E	120	65	100	65	0.541666667	0.541666667	3.5	0	1	0	1	0	1	0	0	0	1	0	17.75	4.375	22.125	8	1	9	11	1	12	5.25	0	0	0	5	4	1	0.363636364	4	3	2	avoided	0	0	0	0	0
2015_08	2015_08_02	2015_08_02_2_1	FE	F	E	120	65	100	65	0.541666667	0.541666667	3.5	0	1	0	1	0	1	0	0	0	1	0	17.75	4.375	22.125	8	1	9	11	1	12	5.25	0	0	0	5	4	1	0.363636364	4	3	2	grazed	0	0	0	0	0
2015_08	2015_08_02	2015_08_02_2_2	FE	F	E	120	65	100	65	0.541666667	0.541666667	3.5	0	1	0	1	0	1	0	0	0	1	0	17.75	4.375	22.125	8	1	9	11	1	12	5.25	0	0	0	5	4	1	0.363636364	4	3	2	avoided	0	0	0	0	0
2015_08	2015_08_02	2015_08_02_3_1	FE	F	E	120	65	100	65	0.541666667	0.541666667	3.5	0	1	0	1	0	1	0	0	0	1	0	17.75	4.375	22.125	8	1	9	11	1	12	5.25	0	0	0	5	4	1	0.363636364	4	3	2	grazed	0	0	0	0	0
2015_08	2015_08_02	2015_08_02_3_2	FE	F	E	120	65	100	65	0.541666667	0.541666667	3.5	0	1	0	1	0	1	0	0	0	1	0	17.75	4.375	22.125	8	1	9	11	1	12	5.25	0	0	0	5	4	1	0.363636364	4	3	2	avoided	0	0	0	0	0
2015_08	2015_08_02	2015_08_02_4_1	FE	F	E	120	65	100	65	0.541666667	0.541666667	3.5	0	1	0	1	0	1	0	0	0	1	0	17.75	4.375	22.125	8	1	9	11	1	12	5.25	0	0	0	5	4	1	0.363636364	4	3	2	grazed	1	0	0	0	0
2015_08	2015_08_02	2015_08_02_4_2	FE	F	E	120	65	100	65	0.541666667	0.541666667	3.5	0	1	0	1	0	1	0	0	0	1	0	17.75	4.375	22.125	8	1	9	11	1	12	5.25	0	0	0	5	4	1	0.363636364	4	3	2	avoided	0	0	0	0	0
2015_08	2015_08_03	2015_08_03_1_1	FE	F	E	120	65	100	65	0.541666667	0.541666667	3.5	0	1	0	1	0	1	0	0	0	1	0	5	7.25	12.25	7	1	8	11	1	12	5.25	0	0	0	5	3	2	0.769230769	2	1	5	grazed	1	0	0	0	0
2015_08	2015_08_03	2015_08_03_1_2	FE	F	E	120	65	100	65	0.541666667	0.541666667	3.5	0	1	0	1	0	1	0	0	0	1	0	5	7.25	12.25	7	1	8	11	1	12	5.25	0	0	0	5	3	2	0.769230769	2	1	5	avoided	0	0	0	0	0
2015_08	2015_08_03	2015_08_03_2_1	FE	F	E	120	65	100	65	0.541666667	0.541666667	3.5	0	1	0	1	0	1	0	0	0	1	0	5	7.25	12.25	7	1	8	11	1	12	5.25	0	0	0	5	3	2	0.769230769	2	1	5	grazed	0	0	0	0	0
2015_08	2015_08_03	2015_08_03_2_2	FE	F	E	120	65	100	65	0.541666667	0.541666667	3.5	0	1	0	1	0	1	0	0	0	1	0	5	7.25	12.25	7	1	8	11	1	12	5.25	0	0	0	5	3	2	0.769230769	2	1	5	avoided	1	0	0	0	0
2015_08	2015_08_03	2015_08_03_3_1	FE	F	E	120	65	100	65	0.541666667	0.541666667	3.5	0	1	0	1	0	1	0	0	0	1	0	5	7.25	12.25	7	1	8	11	1	12	5.25	0	0	0	5	3	2	0.769230769	2	1	5	grazed	0	0	0	0	0
2015_08	2015_08_03	2015_08_03_3_2	FE	F	E	120	65	100	65	0.541666667	0.541666667	3.5	0	1	0	1	0	1	0	0	0	1	0	5	7.25	12.25	7	1	8	11	1	12	5.25	0	0	0	5	3	2	0.769230769	2	1	5	avoided	0	0	0	0	0
2015_08	2015_08_03	2015_08_03_4_1	FE	F	E	120	65	100	65	0.541666667	0.541666667	3.5	0	1	0	1	0	1	0	0	0	1	0	5	7.25	12.25	7	1	8	11	1	12	5.25	0	0	0	5	3	2	0.769230769	2	1	5	grazed	0	0	0	0	0
2015_08	2015_08_03	2015_08_03_4_2	FE	F	E	120	65	100	65	0.541666667	0.541666667	3.5	0	1	0	1	0	1	0	0	0	1	0	5	7.25	12.25	7	1	8	11	1	12	5.25	0	0	0	5	3	2	0.769230769	2	1	5	avoided	0	0	0	0	0
2015_08	2015_08_04	2015_08_04_1_1	FE	F	E	120	65	100	65	0.541666667	0.541666667	3.5	0	1	0	1	0	1	0	0	0	1	1	4.25	2.5	6.75	7	1	8	11	1	12	5.25	0	0	0	5	2	3	0.4	5	1	2	grazed	1	0	0	0	0
2015_08	2015_08_04	2015_08_04_1_2	FE	F	E	120	65	100	65	0.541666667	0.541666667	3.5	0	1	0	1	0	1	0	0	0	1	1	4.25	2.5	6.75	7	1	8	11	1	12	5.25	0	0	0	5	2	3	0.4	5	1	2	avoided	0	0	0	0	0
2015_08	2015_08_04	2015_08_04_2_1	FE	F	E	120	65	100	65	0.541666667	0.541666667	3.5	0	1	0	1	0	1	0	0	0	1	1	4.25	2.5	6.75	7	1	8	11	1	12	5.25	0	0	0	5	2	3	0.4	5	1	2	grazed	1	0	0	0	0
2015_08	2015_08_04	2015_08_04_2_2	FE	F	E	120	65	100	65	0.541666667	0.541666667	3.5	0	1	0	1	0	1	0	0	0	1	1	4.25	2.5	6.75	7	1	8	11	1	12	5.25	0	0	0	5	2	3	0.4	5	1	2	avoided	0	0	0	0	0
2015_08	2015_08_04	2015_08_04_3_1	FE	F	E	120	65	100	65	0.541666667	0.541666667	3.5	0	1	0	1	0	1	0	0	0	1	1	4.25	2.5	6.75	7	1	8	11	1	12	5.25	0	0	0	5	2	3	0.4	5	1	2	grazed	1	0	0	0	0
2015_08	2015_08_04	2015_08_04_3_2	FE	F	E	120	65	100	65	0.541666667	0.541666667	3.5	0	1	0	1	0	1	0	0	0	1	1	4.25	2.5	6.75	7	1	8	11	1	12	5.25	0	0	0	5	2	3	0.4	5	1	2	avoided	0	0	0	0	0
2015_08	2015_08_04	2015_08_04_4_1	FE	F	E	120	65	100	65	0.541666667	0.541666667	3.5	0	1	0	1	0	1	0	0	0	1	1	4.25	2.5	6.75	7	1	8	11	1	12	5.25	0	0	0	5	2	3	0.4	5	1	2	grazed	0	0	0	0	0
2015_08	2015_08_04	2015_08_04_4_2	FE	F	E	120	65	100	65	0.541666667	0.541666667	3.5	0	1	0	1	0	1	0	0	0	1	1	4.25	2.5	6.75	7	1	8	11	1	12	5.25	0	0	0	5	2	3	0.4	5	1	2	avoided	1	0	0	0	0
2015_09	2015_09_01	2015_09_01_1_1	PE	P	E	65	65	20	55	1	0.846153846	1.5	0	0	0	0	0	0	0	0	0	0	0	13.375	10.25	23.625	10	4	14	16	4	20	11	3	1	4	5	3	2	0.666666667	6	1	7	grazed	0	0	0	0	0
2015_09	2015_09_01	2015_09_01_1_2	PE	P	E	65	65	20	55	1	0.846153846	1.5	0	0	0	0	0	0	0	0	0	0	0	13.375	10.25	23.625	10	4	14	16	4	20	11	3	1	4	5	3	2	0.666666667	6	1	7	avoided	0	0	0	0	0
2015_09	2015_09_01	2015_09_01_2_1	PE	P	E	65	65	20	55	1	0.846153846	1.5	0	0	0	0	0	0	0	0	0	0	0	13.375	10.25	23.625	10	4	14	16	4	20	11	3	1	4	5	3	2	0.666666667	6	1	7	grazed	0	0	0	0	0
2015_09	2015_09_01	2015_09_01_2_2	PE	P	E	65	65	20	55	1	0.846153846	1.5	0	0	0	0	0	0	0	0	0	0	0	13.375	10.25	23.625	10	4	14	16	4	20	11	3	1	4	5	3	2	0.666666667	6	1	7	avoided	0	0	0	0	0
2015_09	2015_09_01	2015_09_01_3_1	PE	P	E	65	65	20	55	1	0.846153846	1.5	0	0	0	0	0	0	0	0	0	0	0	13.375	10.25	23.625	10	4	14	16	4	20	11	3	1	4	5	3	2	0.666666667	6	1	7	grazed	0	0	0	0	0
2015_09	2015_09_01	2015_09_01_3_2	PE	P	E	65	65	20	55	1	0.846153846	1.5	0	0	0	0	0	0	0	0	0	0	0	13.375	10.25	23.625	10	4	14	16	4	20	11	3	1	4	5	3	2	0.666666667	6	1	7	avoided	0	0	0	0	0
2015_09	2015_09_01	2015_09_01_4_1	PE	P	E	65	65	20	55	1	0.846153846	1.5	0	0	0	0	0	0	0	0	0	0	0	13.375	10.25	23.625	10	4	14	16	4	20	11	3	1	4	5	3	2	0.666666667	6	1	7	grazed	0	0	0	1	0
2015_09	2015_09_01	2015_09_01_4_2	PE	P	E	65	65	20	55	1	0.846153846	1.5	0	0	0	0	0	0	0	0	0	0	0	13.375	10.25	23.625	10	4	14	16	4	20	11	3	1	4	5	3	2	0.666666667	6	1	7	avoided	0	0	0	1	0
2015_09	2015_09_02	2015_09_02_1_1	PE	P	E	65	65	20	55	1	0.846153846	1.5	0	0	0	1	0	1	0	0	0	1	0	10.75	24.25	35	6	2	8	16	4	20	11	2	2	4	5	2	3	0.666666667	1	3	4	grazed	0	0	0	0	0
2015_09	2015_09_02	2015_09_02_1_2	PE	P	E	65	65	20	55	1	0.846153846	1.5	0	0	0	1	0	1	0	0	0	1	0	10.75	24.25	35	6	2	8	16	4	20	11	2	2	4	5	2	3	0.666666667	1	3	4	avoided	0	0	0	0	0
2015_09	2015_09_02	2015_09_02_2_1	PE	P	E	65	65	20	55	1	0.846153846	1.5	0	0	0	1	0	1	0	0	0	1	0	10.75	24.25	35	6	2	8	16	4	20	11	2	2	4	5	2	3	0.666666667	1	3	4	grazed	0	0	0	0	0
2015_09	2015_09_02	2015_09_02_2_2	PE	P	E	65	65	20	55	1	0.846153846	1.5	0	0	0	1	0	1	0	0	0	1	0	10.75	24.25	35	6	2	8	16	4	20	11	2	2	4	5	2	3	0.666666667	1	3	4	avoided	0	0	0	0	0
2015_09	2015_09_02	2015_09_02_3_1	PE	P	E	65	65	20	55	1	0.846153846	1.5	0	0	0	1	0	1	0	0	0	1	0	10.75	24.25	35	6	2	8	16	4	20	11	2	2	4	5	2	3	0.666666667	1	3	4	grazed	0	0	0	0	0
2015_09	2015_09_02	2015_09_02_3_2	PE	P	E	65	65	20	55	1	0.846153846	1.5	0	0	0	1	0	1	0	0	0	1	0	10.75	24.25	35	6	2	8	16	4	20	11	2	2	4	5	2	3	0.666666667	1	3	4	avoided	0	0	0	0	0
2015_09	2015_09_02	2015_09_02_4_1	PE	P	E	65	65	20	55	1	0.846153846	1.5	0	0	0	1	0	1	0	0	0	1	0	10.75	24.25	35	6	2	8	16	4	20	11	2	2	4	5	2	3	0.666666667	1	3	4	grazed	0	0	0	0	0
2015_09	2015_09_02	2015_09_02_4_2	PE	P	E	65	65	20	55	1	0.846153846	1.5	0	0	0	1	0	1	0	0	0	1	0	10.75	24.25	35	6	2	8	16	4	20	11	2	2	4	5	2	3	0.666666667	1	3	4	avoided	0	0	0	1	0
2015_09	2015_09_03	2015_09_03_1_1	PE	P	E	65	65	20	55	1	0.846153846	1.5	0	0	0	1	0	1	0	0	0	1	1	11.375	9.875	21.25	5	2	7	16	4	20	11	1	3	4	5	3	2	0.727272727	1	2	4	grazed	0	0	0	0	0
2015_09	2015_09_03	2015_09_03_1_2	PE	P	E	65	65	20	55	1	0.846153846	1.5	0	0	0	1	0	1	0	0	0	1	1	11.375	9.875	21.25	5	2	7	16	4	20	11	1	3	4	5	3	2	0.727272727	1	2	4	avoided	0	0	0	0	0
2015_09	2015_09_03	2015_09_03_2_1	PE	P	E	65	65	20	55	1	0.846153846	1.5	0	0	0	1	0	1	0	0	0	1	1	11.375	9.875	21.25	5	2	7	16	4	20	11	1	3	4	5	3	2	0.727272727	1	2	4	grazed	0	0	0	0	0
2015_09	2015_09_03	2015_09_03_2_2	PE	P	E	65	65	20	55	1	0.846153846	1.5	0	0	0	1	0	1	0	0	0	1	1	11.375	9.875	21.25	5	2	7	16	4	20	11	1	3	4	5	3	2	0.727272727	1	2	4	avoided	0	0	0	0	0
2015_09	2015_09_03	2015_09_03_3_1	PE	P	E	65	65	20	55	1	0.846153846	1.5	0	0	0	1	0	1	0	0	0	1	1	11.375	9.875	21.25	5	2	7	16	4	20	11	1	3	4	5	3	2	0.727272727	1	2	4	grazed	0	0	0	0	0
2015_09	2015_09_03	2015_09_03_3_2	PE	P	E	65	65	20	55	1	0.846153846	1.5	0	0	0	1	0	1	0	0	0	1	1	11.375	9.875	21.25	5	2	7	16	4	20	11	1	3	4	5	3	2	0.727272727	1	2	4	avoided	0	0	0	0	0
2015_09	2015_09_03	2015_09_03_4_1	PE	P	E	65	65	20	55	1	0.846153846	1.5	0	0	0	1	0	1	0	0	0	1	1	11.375	9.875	21.25	5	2	7	16	4	20	11	1	3	4	5	3	2	0.727272727	1	2	4	grazed	0	0	0	0	0
2015_09	2015_09_03	2015_09_03_4_2	PE	P	E	65	65	20	55	1	0.846153846	1.5	0	0	0	1	0	1	0	0	0	1	1	11.375	9.875	21.25	5	2	7	16	4	20	11	1	3	4	5	3	2	0.727272727	1	2	4	avoided	0	0	0	0	0
NA	2015_09_04	2015_09_04_1_1	NA	NA	NA	NA	NA	NA	NA	NA	NA	NA	NA	NA	NA	NA	NA	NA	NA	NA	NA	NA	NA	NA	NA	NA	NA	NA	NA	NA	NA	NA	NA	NA	NA	NA	NA	NA	NA	NA	NA	NA	NA	grazed	0	0	0	0	0
NA	2015_09_04	2015_09_04_1_2	NA	NA	NA	NA	NA	NA	NA	NA	NA	NA	NA	NA	NA	NA	NA	NA	NA	NA	NA	NA	NA	NA	NA	NA	NA	NA	NA	NA	NA	NA	NA	NA	NA	NA	NA	NA	NA	NA	NA	NA	NA	avoided	0	0	0	0	0
NA	2015_09_04	2015_09_04_2_1	NA	NA	NA	NA	NA	NA	NA	NA	NA	NA	NA	NA	NA	NA	NA	NA	NA	NA	NA	NA	NA	NA	NA	NA	NA	NA	NA	NA	NA	NA	NA	NA	NA	NA	NA	NA	NA	NA	NA	NA	NA	grazed	0	0	0	0	0
NA	2015_09_04	2015_09_04_2_2	NA	NA	NA	NA	NA	NA	NA	NA	NA	NA	NA	NA	NA	NA	NA	NA	NA	NA	NA	NA	NA	NA	NA	NA	NA	NA	NA	NA	NA	NA	NA	NA	NA	NA	NA	NA	NA	NA	NA	NA	NA	avoided	0	0	0	0	0
NA	2015_09_04	2015_09_04_3_1	NA	NA	NA	NA	NA	NA	NA	NA	NA	NA	NA	NA	NA	NA	NA	NA	NA	NA	NA	NA	NA	NA	NA	NA	NA	NA	NA	NA	NA	NA	NA	NA	NA	NA	NA	NA	NA	NA	NA	NA	NA	grazed	0	0	0	0	0
NA	2015_09_04	2015_09_04_3_2	NA	NA	NA	NA	NA	NA	NA	NA	NA	NA	NA	NA	NA	NA	NA	NA	NA	NA	NA	NA	NA	NA	NA	NA	NA	NA	NA	NA	NA	NA	NA	NA	NA	NA	NA	NA	NA	NA	NA	NA	NA	avoided	0	0	0	0	0
NA	2015_09_04	2015_09_04_4_1	NA	NA	NA	NA	NA	NA	NA	NA	NA	NA	NA	NA	NA	NA	NA	NA	NA	NA	NA	NA	NA	NA	NA	NA	NA	NA	NA	NA	NA	NA	NA	NA	NA	NA	NA	NA	NA	NA	NA	NA	NA	grazed	0	0	0	0	0
NA	2015_09_04	2015_09_04_4_2	NA	NA	NA	NA	NA	NA	NA	NA	NA	NA	NA	NA	NA	NA	NA	NA	NA	NA	NA	NA	NA	NA	NA	NA	NA	NA	NA	NA	NA	NA	NA	NA	NA	NA	NA	NA	NA	NA	NA	NA	NA	avoided	0	0	0	0	0
NA	2015_10_01	2015_10_01_1_1	NA	NA	NA	NA	NA	NA	NA	NA	NA	NA	NA	NA	NA	NA	NA	NA	NA	NA	NA	NA	NA	NA	NA	NA	NA	NA	NA	NA	NA	NA	NA	NA	NA	NA	NA	NA	NA	NA	NA	NA	NA	grazed	0	0	0	0	0
NA	2015_10_01	2015_10_01_1_2	NA	NA	NA	NA	NA	NA	NA	NA	NA	NA	NA	NA	NA	NA	NA	NA	NA	NA	NA	NA	NA	NA	NA	NA	NA	NA	NA	NA	NA	NA	NA	NA	NA	NA	NA	NA	NA	NA	NA	NA	NA	avoided	0	0	0	0	0
NA	2015_10_01	2015_10_01_2_1	NA	NA	NA	NA	NA	NA	NA	NA	NA	NA	NA	NA	NA	NA	NA	NA	NA	NA	NA	NA	NA	NA	NA	NA	NA	NA	NA	NA	NA	NA	NA	NA	NA	NA	NA	NA	NA	NA	NA	NA	NA	grazed	0	0	0	0	0
NA	2015_10_01	2015_10_01_2_2	NA	NA	NA	NA	NA	NA	NA	NA	NA	NA	NA	NA	NA	NA	NA	NA	NA	NA	NA	NA	NA	NA	NA	NA	NA	NA	NA	NA	NA	NA	NA	NA	NA	NA	NA	NA	NA	NA	NA	NA	NA	avoided	0	0	0	0	0
NA	2015_10_01	2015_10_01_3_1	NA	NA	NA	NA	NA	NA	NA	NA	NA	NA	NA	NA	NA	NA	NA	NA	NA	NA	NA	NA	NA	NA	NA	NA	NA	NA	NA	NA	NA	NA	NA	NA	NA	NA	NA	NA	NA	NA	NA	NA	NA	grazed	0	0	0	0	0
NA	2015_10_01	2015_10_01_3_2	NA	NA	NA	NA	NA	NA	NA	NA	NA	NA	NA	NA	NA	NA	NA	NA	NA	NA	NA	NA	NA	NA	NA	NA	NA	NA	NA	NA	NA	NA	NA	NA	NA	NA	NA	NA	NA	NA	NA	NA	NA	avoided	0	0	0	0	0
NA	2015_10_01	2015_10_01_4_1	NA	NA	NA	NA	NA	NA	NA	NA	NA	NA	NA	NA	NA	NA	NA	NA	NA	NA	NA	NA	NA	NA	NA	NA	NA	NA	NA	NA	NA	NA	NA	NA	NA	NA	NA	NA	NA	NA	NA	NA	NA	grazed	0	0	0	0	0
NA	2015_10_01	2015_10_01_4_2	NA	NA	NA	NA	NA	NA	NA	NA	NA	NA	NA	NA	NA	NA	NA	NA	NA	NA	NA	NA	NA	NA	NA	NA	NA	NA	NA	NA	NA	NA	NA	NA	NA	NA	NA	NA	NA	NA	NA	NA	NA	avoided	0	0	0	0	0
NA	2015_10_02	2015_10_02_1_1	NA	NA	NA	NA	NA	NA	NA	NA	NA	NA	NA	NA	NA	NA	NA	NA	NA	NA	NA	NA	NA	NA	NA	NA	NA	NA	NA	NA	NA	NA	NA	NA	NA	NA	NA	NA	NA	NA	NA	NA	NA	grazed	0	0	0	0	0
NA	2015_10_02	2015_10_02_1_2	NA	NA	NA	NA	NA	NA	NA	NA	NA	NA	NA	NA	NA	NA	NA	NA	NA	NA	NA	NA	NA	NA	NA	NA	NA	NA	NA	NA	NA	NA	NA	NA	NA	NA	NA	NA	NA	NA	NA	NA	NA	avoided	0	0	0	0	0
NA	2015_10_02	2015_10_02_2_1	NA	NA	NA	NA	NA	NA	NA	NA	NA	NA	NA	NA	NA	NA	NA	NA	NA	NA	NA	NA	NA	NA	NA	NA	NA	NA	NA	NA	NA	NA	NA	NA	NA	NA	NA	NA	NA	NA	NA	NA	NA	grazed	0	0	0	0	0
NA	2015_10_02	2015_10_02_2_2	NA	NA	NA	NA	NA	NA	NA	NA	NA	NA	NA	NA	NA	NA	NA	NA	NA	NA	NA	NA	NA	NA	NA	NA	NA	NA	NA	NA	NA	NA	NA	NA	NA	NA	NA	NA	NA	NA	NA	NA	NA	avoided	0	0	0	0	0
NA	2015_10_02	2015_10_02_3_1	NA	NA	NA	NA	NA	NA	NA	NA	NA	NA	NA	NA	NA	NA	NA	NA	NA	NA	NA	NA	NA	NA	NA	NA	NA	NA	NA	NA	NA	NA	NA	NA	NA	NA	NA	NA	NA	NA	NA	NA	NA	grazed	0	0	0	0	0
NA	2015_10_02	2015_10_02_3_2	NA	NA	NA	NA	NA	NA	NA	NA	NA	NA	NA	NA	NA	NA	NA	NA	NA	NA	NA	NA	NA	NA	NA	NA	NA	NA	NA	NA	NA	NA	NA	NA	NA	NA	NA	NA	NA	NA	NA	NA	NA	avoided	0	0	0	0	0
NA	2015_10_02	2015_10_02_4_1	NA	NA	NA	NA	NA	NA	NA	NA	NA	NA	NA	NA	NA	NA	NA	NA	NA	NA	NA	NA	NA	NA	NA	NA	NA	NA	NA	NA	NA	NA	NA	NA	NA	NA	NA	NA	NA	NA	NA	NA	NA	grazed	0	0	0	0	0
NA	2015_10_02	2015_10_02_4_2	NA	NA	NA	NA	NA	NA	NA	NA	NA	NA	NA	NA	NA	NA	NA	NA	NA	NA	NA	NA	NA	NA	NA	NA	NA	NA	NA	NA	NA	NA	NA	NA	NA	NA	NA	NA	NA	NA	NA	NA	NA	avoided	0	0	0	0	0
NA	2015_10_03	2015_10_03_1_1	NA	NA	NA	NA	NA	NA	NA	NA	NA	NA	NA	NA	NA	NA	NA	NA	NA	NA	NA	NA	NA	NA	NA	NA	NA	NA	NA	NA	NA	NA	NA	NA	NA	NA	NA	NA	NA	NA	NA	NA	NA	grazed	0	0	0	0	0
NA	2015_10_03	2015_10_03_1_2	NA	NA	NA	NA	NA	NA	NA	NA	NA	NA	NA	NA	NA	NA	NA	NA	NA	NA	NA	NA	NA	NA	NA	NA	NA	NA	NA	NA	NA	NA	NA	NA	NA	NA	NA	NA	NA	NA	NA	NA	NA	avoided	0	0	0	0	0
NA	2015_10_03	2015_10_03_2_1	NA	NA	NA	NA	NA	NA	NA	NA	NA	NA	NA	NA	NA	NA	NA	NA	NA	NA	NA	NA	NA	NA	NA	NA	NA	NA	NA	NA	NA	NA	NA	NA	NA	NA	NA	NA	NA	NA	NA	NA	NA	grazed	0	0	0	0	0
NA	2015_10_03	2015_10_03_2_2	NA	NA	NA	NA	NA	NA	NA	NA	NA	NA	NA	NA	NA	NA	NA	NA	NA	NA	NA	NA	NA	NA	NA	NA	NA	NA	NA	NA	NA	NA	NA	NA	NA	NA	NA	NA	NA	NA	NA	NA	NA	avoided	0	0	0	0	0
NA	2015_10_03	2015_10_03_3_1	NA	NA	NA	NA	NA	NA	NA	NA	NA	NA	NA	NA	NA	NA	NA	NA	NA	NA	NA	NA	NA	NA	NA	NA	NA	NA	NA	NA	NA	NA	NA	NA	NA	NA	NA	NA	NA	NA	NA	NA	NA	grazed	0	0	0	0	0
NA	2015_10_03	2015_10_03_3_2	NA	NA	NA	NA	NA	NA	NA	NA	NA	NA	NA	NA	NA	NA	NA	NA	NA	NA	NA	NA	NA	NA	NA	NA	NA	NA	NA	NA	NA	NA	NA	NA	NA	NA	NA	NA	NA	NA	NA	NA	NA	avoided	0	0	0	0	0
NA	2015_10_03	2015_10_03_4_1	NA	NA	NA	NA	NA	NA	NA	NA	NA	NA	NA	NA	NA	NA	NA	NA	NA	NA	NA	NA	NA	NA	NA	NA	NA	NA	NA	NA	NA	NA	NA	NA	NA	NA	NA	NA	NA	NA	NA	NA	NA	grazed	0	0	0	0	0
NA	2015_10_03	2015_10_03_4_2	NA	NA	NA	NA	NA	NA	NA	NA	NA	NA	NA	NA	NA	NA	NA	NA	NA	NA	NA	NA	NA	NA	NA	NA	NA	NA	NA	NA	NA	NA	NA	NA	NA	NA	NA	NA	NA	NA	NA	NA	NA	avoided	0	0	0	0	0
NA	2015_10_04	2015_10_04_1_1	NA	NA	NA	NA	NA	NA	NA	NA	NA	NA	NA	NA	NA	NA	NA	NA	NA	NA	NA	NA	NA	NA	NA	NA	NA	NA	NA	NA	NA	NA	NA	NA	NA	NA	NA	NA	NA	NA	NA	NA	NA	grazed	0	0	0	0	0
NA	2015_10_04	2015_10_04_1_2	NA	NA	NA	NA	NA	NA	NA	NA	NA	NA	NA	NA	NA	NA	NA	NA	NA	NA	NA	NA	NA	NA	NA	NA	NA	NA	NA	NA	NA	NA	NA	NA	NA	NA	NA	NA	NA	NA	NA	NA	NA	avoided	0	0	0	0	0
NA	2015_10_04	2015_10_04_2_1	NA	NA	NA	NA	NA	NA	NA	NA	NA	NA	NA	NA	NA	NA	NA	NA	NA	NA	NA	NA	NA	NA	NA	NA	NA	NA	NA	NA	NA	NA	NA	NA	NA	NA	NA	NA	NA	NA	NA	NA	NA	grazed	0	0	0	0	0
NA	2015_10_04	2015_10_04_2_2	NA	NA	NA	NA	NA	NA	NA	NA	NA	NA	NA	NA	NA	NA	NA	NA	NA	NA	NA	NA	NA	NA	NA	NA	NA	NA	NA	NA	NA	NA	NA	NA	NA	NA	NA	NA	NA	NA	NA	NA	NA	avoided	0	0	0	0	0
NA	2015_10_04	2015_10_04_3_1	NA	NA	NA	NA	NA	NA	NA	NA	NA	NA	NA	NA	NA	NA	NA	NA	NA	NA	NA	NA	NA	NA	NA	NA	NA	NA	NA	NA	NA	NA	NA	NA	NA	NA	NA	NA	NA	NA	NA	NA	NA	grazed	0	0	0	0	0
NA	2015_10_04	2015_10_04_3_2	NA	NA	NA	NA	NA	NA	NA	NA	NA	NA	NA	NA	NA	NA	NA	NA	NA	NA	NA	NA	NA	NA	NA	NA	NA	NA	NA	NA	NA	NA	NA	NA	NA	NA	NA	NA	NA	NA	NA	NA	NA	avoided	0	0	0	0	0
NA	2015_10_04	2015_10_04_4_1	NA	NA	NA	NA	NA	NA	NA	NA	NA	NA	NA	NA	NA	NA	NA	NA	NA	NA	NA	NA	NA	NA	NA	NA	NA	NA	NA	NA	NA	NA	NA	NA	NA	NA	NA	NA	NA	NA	NA	NA	NA	grazed	0	0	0	0	0
NA	2015_10_04	2015_10_04_4_2	NA	NA	NA	NA	NA	NA	NA	NA	NA	NA	NA	NA	NA	NA	NA	NA	NA	NA	NA	NA	NA	NA	NA	NA	NA	NA	NA	NA	NA	NA	NA	NA	NA	NA	NA	NA	NA	NA	NA	NA	NA	avoided	0	0	0	0	0
NA	2015_12_01	2015_12_01_1_1	NA	NA	NA	NA	NA	NA	NA	NA	NA	NA	NA	NA	NA	NA	NA	NA	NA	NA	NA	NA	NA	NA	NA	NA	NA	NA	NA	NA	NA	NA	NA	NA	NA	NA	NA	NA	NA	NA	NA	NA	NA	grazed	0	0	0	0	0
NA	2015_12_01	2015_12_01_1_2	NA	NA	NA	NA	NA	NA	NA	NA	NA	NA	NA	NA	NA	NA	NA	NA	NA	NA	NA	NA	NA	NA	NA	NA	NA	NA	NA	NA	NA	NA	NA	NA	NA	NA	NA	NA	NA	NA	NA	NA	NA	avoided	0	0	0	0	0
NA	2015_12_01	2015_12_01_2_1	NA	NA	NA	NA	NA	NA	NA	NA	NA	NA	NA	NA	NA	NA	NA	NA	NA	NA	NA	NA	NA	NA	NA	NA	NA	NA	NA	NA	NA	NA	NA	NA	NA	NA	NA	NA	NA	NA	NA	NA	NA	grazed	0	0	0	0	0
NA	2015_12_01	2015_12_01_2_2	NA	NA	NA	NA	NA	NA	NA	NA	NA	NA	NA	NA	NA	NA	NA	NA	NA	NA	NA	NA	NA	NA	NA	NA	NA	NA	NA	NA	NA	NA	NA	NA	NA	NA	NA	NA	NA	NA	NA	NA	NA	avoided	0	0	0	0	0
NA	2015_12_01	2015_12_01_3_1	NA	NA	NA	NA	NA	NA	NA	NA	NA	NA	NA	NA	NA	NA	NA	NA	NA	NA	NA	NA	NA	NA	NA	NA	NA	NA	NA	NA	NA	NA	NA	NA	NA	NA	NA	NA	NA	NA	NA	NA	NA	grazed	0	0	0	0	0
NA	2015_12_01	2015_12_01_3_2	NA	NA	NA	NA	NA	NA	NA	NA	NA	NA	NA	NA	NA	NA	NA	NA	NA	NA	NA	NA	NA	NA	NA	NA	NA	NA	NA	NA	NA	NA	NA	NA	NA	NA	NA	NA	NA	NA	NA	NA	NA	avoided	0	0	0	0	0
NA	2015_12_01	2015_12_01_4_1	NA	NA	NA	NA	NA	NA	NA	NA	NA	NA	NA	NA	NA	NA	NA	NA	NA	NA	NA	NA	NA	NA	NA	NA	NA	NA	NA	NA	NA	NA	NA	NA	NA	NA	NA	NA	NA	NA	NA	NA	NA	grazed	0	0	0	0	0
NA	2015_12_01	2015_12_01_4_2	NA	NA	NA	NA	NA	NA	NA	NA	NA	NA	NA	NA	NA	NA	NA	NA	NA	NA	NA	NA	NA	NA	NA	NA	NA	NA	NA	NA	NA	NA	NA	NA	NA	NA	NA	NA	NA	NA	NA	NA	NA	avoided	0	0	0	0	0
2015_12	2015_12_02	2015_12_02_1_1	FE	F	E	94	42	10.75	8	0.446808511	0.085106383	1.8	0	0	0	1	0	1	1	0	0	1	0	15.5	19.0125	34.5125	6	1	7	8	2	10	4	0	0	0	2	2	0	0.727272727	2	1	4	grazed	0	0	0	0	0
2015_12	2015_12_02	2015_12_02_1_2	FE	F	E	94	42	10.75	8	0.446808511	0.085106383	1.8	0	0	0	1	0	1	1	0	0	1	0	15.5	19.0125	34.5125	6	1	7	8	2	10	4	0	0	0	2	2	0	0.727272727	2	1	4	avoided	0	0	0	0	0
2015_12	2015_12_02	2015_12_02_2_1	FE	F	E	94	42	10.75	8	0.446808511	0.085106383	1.8	0	0	0	1	0	1	1	0	0	1	0	15.5	19.0125	34.5125	6	1	7	8	2	10	4	0	0	0	2	2	0	0.727272727	2	1	4	grazed	0	0	0	0	0
2015_12	2015_12_02	2015_12_02_2_2	FE	F	E	94	42	10.75	8	0.446808511	0.085106383	1.8	0	0	0	1	0	1	1	0	0	1	0	15.5	19.0125	34.5125	6	1	7	8	2	10	4	0	0	0	2	2	0	0.727272727	2	1	4	avoided	0	0	0	0	0
2015_12	2015_12_02	2015_12_02_3_1	FE	F	E	94	42	10.75	8	0.446808511	0.085106383	1.8	0	0	0	1	0	1	1	0	0	1	0	15.5	19.0125	34.5125	6	1	7	8	2	10	4	0	0	0	2	2	0	0.727272727	2	1	4	grazed	0	0	0	0	0
2015_12	2015_12_02	2015_12_02_3_2	FE	F	E	94	42	10.75	8	0.446808511	0.085106383	1.8	0	0	0	1	0	1	1	0	0	1	0	15.5	19.0125	34.5125	6	1	7	8	2	10	4	0	0	0	2	2	0	0.727272727	2	1	4	avoided	0	0	0	0	0
2015_12	2015_12_02	2015_12_02_4_1	FE	F	E	94	42	10.75	8	0.446808511	0.085106383	1.8	0	0	0	1	0	1	1	0	0	1	0	15.5	19.0125	34.5125	6	1	7	8	2	10	4	0	0	0	2	2	0	0.727272727	2	1	4	grazed	0	0	0	0	0
2015_12	2015_12_02	2015_12_02_4_2	FE	F	E	94	42	10.75	8	0.446808511	0.085106383	1.8	0	0	0	1	0	1	1	0	0	1	0	15.5	19.0125	34.5125	6	1	7	8	2	10	4	0	0	0	2	2	0	0.727272727	2	1	4	avoided	0	0	0	0	0
NA	2015_12_03	2015_12_03_1_1	NA	NA	NA	NA	NA	NA	NA	NA	NA	NA	NA	NA	NA	NA	NA	NA	NA	NA	NA	NA	NA	NA	NA	NA	NA	NA	NA	NA	NA	NA	NA	NA	NA	NA	NA	NA	NA	NA	NA	NA	NA	grazed	0	0	0	0	0
NA	2015_12_03	2015_12_03_1_2	NA	NA	NA	NA	NA	NA	NA	NA	NA	NA	NA	NA	NA	NA	NA	NA	NA	NA	NA	NA	NA	NA	NA	NA	NA	NA	NA	NA	NA	NA	NA	NA	NA	NA	NA	NA	NA	NA	NA	NA	NA	avoided	0	0	0	0	0
NA	2015_12_03	2015_12_03_2_1	NA	NA	NA	NA	NA	NA	NA	NA	NA	NA	NA	NA	NA	NA	NA	NA	NA	NA	NA	NA	NA	NA	NA	NA	NA	NA	NA	NA	NA	NA	NA	NA	NA	NA	NA	NA	NA	NA	NA	NA	NA	grazed	0	0	0	0	0
NA	2015_12_03	2015_12_03_2_2	NA	NA	NA	NA	NA	NA	NA	NA	NA	NA	NA	NA	NA	NA	NA	NA	NA	NA	NA	NA	NA	NA	NA	NA	NA	NA	NA	NA	NA	NA	NA	NA	NA	NA	NA	NA	NA	NA	NA	NA	NA	avoided	0	0	0	0	0
NA	2015_12_03	2015_12_03_3_1	NA	NA	NA	NA	NA	NA	NA	NA	NA	NA	NA	NA	NA	NA	NA	NA	NA	NA	NA	NA	NA	NA	NA	NA	NA	NA	NA	NA	NA	NA	NA	NA	NA	NA	NA	NA	NA	NA	NA	NA	NA	grazed	0	0	0	0	0
NA	2015_12_03	2015_12_03_3_2	NA	NA	NA	NA	NA	NA	NA	NA	NA	NA	NA	NA	NA	NA	NA	NA	NA	NA	NA	NA	NA	NA	NA	NA	NA	NA	NA	NA	NA	NA	NA	NA	NA	NA	NA	NA	NA	NA	NA	NA	NA	avoided	0	0	0	0	0
NA	2015_12_03	2015_12_03_4_1	NA	NA	NA	NA	NA	NA	NA	NA	NA	NA	NA	NA	NA	NA	NA	NA	NA	NA	NA	NA	NA	NA	NA	NA	NA	NA	NA	NA	NA	NA	NA	NA	NA	NA	NA	NA	NA	NA	NA	NA	NA	grazed	0	0	0	0	0
NA	2015_12_03	2015_12_03_4_2	NA	NA	NA	NA	NA	NA	NA	NA	NA	NA	NA	NA	NA	NA	NA	NA	NA	NA	NA	NA	NA	NA	NA	NA	NA	NA	NA	NA	NA	NA	NA	NA	NA	NA	NA	NA	NA	NA	NA	NA	NA	avoided	0	0	0	0	0
2015_12	2015_12_04	2015_12_04_1_1	FE	F	E	94	42	10.75	8	0.446808511	0.085106383	1.8	0	0	0	1	0	1	1	0	0	0	0	8.6375	1.8	10.4375	6	2	8	8	2	10	4	0	0	0	2	1	1	0.666666667	2	2	4	grazed	0	0	0	0	0
2015_12	2015_12_04	2015_12_04_1_2	FE	F	E	94	42	10.75	8	0.446808511	0.085106383	1.8	0	0	0	1	0	1	1	0	0	0	0	8.6375	1.8	10.4375	6	2	8	8	2	10	4	0	0	0	2	1	1	0.666666667	2	2	4	avoided	0	0	0	0	0
2015_12	2015_12_04	2015_12_04_2_1	FE	F	E	94	42	10.75	8	0.446808511	0.085106383	1.8	0	0	0	1	0	1	1	0	0	0	0	8.6375	1.8	10.4375	6	2	8	8	2	10	4	0	0	0	2	1	1	0.666666667	2	2	4	grazed	0	0	0	0	0
2015_12	2015_12_04	2015_12_04_2_2	FE	F	E	94	42	10.75	8	0.446808511	0.085106383	1.8	0	0	0	1	0	1	1	0	0	0	0	8.6375	1.8	10.4375	6	2	8	8	2	10	4	0	0	0	2	1	1	0.666666667	2	2	4	avoided	0	0	0	0	0
2015_12	2015_12_04	2015_12_04_3_1	FE	F	E	94	42	10.75	8	0.446808511	0.085106383	1.8	0	0	0	1	0	1	1	0	0	0	0	8.6375	1.8	10.4375	6	2	8	8	2	10	4	0	0	0	2	1	1	0.666666667	2	2	4	grazed	0	0	0	0	0
2015_12	2015_12_04	2015_12_04_3_2	FE	F	E	94	42	10.75	8	0.446808511	0.085106383	1.8	0	0	0	1	0	1	1	0	0	0	0	8.6375	1.8	10.4375	6	2	8	8	2	10	4	0	0	0	2	1	1	0.666666667	2	2	4	avoided	0	0	0	0	0
2015_12	2015_12_04	2015_12_04_4_1	FE	F	E	94	42	10.75	8	0.446808511	0.085106383	1.8	0	0	0	1	0	1	1	0	0	0	0	8.6375	1.8	10.4375	6	2	8	8	2	10	4	0	0	0	2	1	1	0.666666667	2	2	4	grazed	0	0	0	0	0
2015_12	2015_12_04	2015_12_04_4_2	FE	F	E	94	42	10.75	8	0.446808511	0.085106383	1.8	0	0	0	1	0	1	1	0	0	0	0	8.6375	1.8	10.4375	6	2	8	8	2	10	4	0	0	0	2	1	1	0.666666667	2	2	4	avoided	0	0	0	0	0
2015_13	2015_13_01	2015_13_01_1_1	FWE	F	WE	146	46	120	46	0.315068493	0.315068493	3	0	0	1	1	1	1	0	0	0	1	0	11.375	1.125	12.5	6	1	7	10	1	11	5	1	0	1	4	3	1	0.6	2	2	3	grazed	0	0	0	0	0
2015_13	2015_13_01	2015_13_01_1_2	FWE	F	WE	146	46	120	46	0.315068493	0.315068493	3	0	0	1	1	1	1	0	0	0	1	0	11.375	1.125	12.5	6	1	7	10	1	11	5	1	0	1	4	3	1	0.6	2	2	3	avoided	0	0	0	0	0
2015_13	2015_13_01	2015_13_01_2_1	FWE	F	WE	146	46	120	46	0.315068493	0.315068493	3	0	0	1	1	1	1	0	0	0	1	0	11.375	1.125	12.5	6	1	7	10	1	11	5	1	0	1	4	3	1	0.6	2	2	3	grazed	0	0	0	0	0
2015_13	2015_13_01	2015_13_01_2_2	FWE	F	WE	146	46	120	46	0.315068493	0.315068493	3	0	0	1	1	1	1	0	0	0	1	0	11.375	1.125	12.5	6	1	7	10	1	11	5	1	0	1	4	3	1	0.6	2	2	3	avoided	0	0	0	0	0
2015_13	2015_13_01	2015_13_01_3_1	FWE	F	WE	146	46	120	46	0.315068493	0.315068493	3	0	0	1	1	1	1	0	0	0	1	0	11.375	1.125	12.5	6	1	7	10	1	11	5	1	0	1	4	3	1	0.6	2	2	3	grazed	0	0	0	0	0
2015_13	2015_13_01	2015_13_01_3_2	FWE	F	WE	146	46	120	46	0.315068493	0.315068493	3	0	0	1	1	1	1	0	0	0	1	0	11.375	1.125	12.5	6	1	7	10	1	11	5	1	0	1	4	3	1	0.6	2	2	3	avoided	0	0	0	0	0
2015_13	2015_13_01	2015_13_01_4_1	FWE	F	WE	146	46	120	46	0.315068493	0.315068493	3	0	0	1	1	1	1	0	0	0	1	0	11.375	1.125	12.5	6	1	7	10	1	11	5	1	0	1	4	3	1	0.6	2	2	3	grazed	0	0	0	0	0
2015_13	2015_13_01	2015_13_01_4_2	FWE	F	WE	146	46	120	46	0.315068493	0.315068493	3	0	0	1	1	1	1	0	0	0	1	0	11.375	1.125	12.5	6	1	7	10	1	11	5	1	0	1	4	3	1	0.6	2	2	3	avoided	0	0	0	0	0
NA	2015_13_02	2015_13_02_1_1	NA	NA	NA	NA	NA	NA	NA	NA	NA	NA	NA	NA	NA	NA	NA	NA	NA	NA	NA	NA	NA	NA	NA	NA	NA	NA	NA	NA	NA	NA	NA	NA	NA	NA	NA	NA	NA	NA	NA	NA	NA	grazed	0	0	0	0	0
NA	2015_13_02	2015_13_02_1_2	NA	NA	NA	NA	NA	NA	NA	NA	NA	NA	NA	NA	NA	NA	NA	NA	NA	NA	NA	NA	NA	NA	NA	NA	NA	NA	NA	NA	NA	NA	NA	NA	NA	NA	NA	NA	NA	NA	NA	NA	NA	avoided	0	0	0	0	0
NA	2015_13_02	2015_13_02_2_1	NA	NA	NA	NA	NA	NA	NA	NA	NA	NA	NA	NA	NA	NA	NA	NA	NA	NA	NA	NA	NA	NA	NA	NA	NA	NA	NA	NA	NA	NA	NA	NA	NA	NA	NA	NA	NA	NA	NA	NA	NA	grazed	0	0	0	0	0
NA	2015_13_02	2015_13_02_2_2	NA	NA	NA	NA	NA	NA	NA	NA	NA	NA	NA	NA	NA	NA	NA	NA	NA	NA	NA	NA	NA	NA	NA	NA	NA	NA	NA	NA	NA	NA	NA	NA	NA	NA	NA	NA	NA	NA	NA	NA	NA	avoided	0	0	0	0	0
NA	2015_13_02	2015_13_02_3_1	NA	NA	NA	NA	NA	NA	NA	NA	NA	NA	NA	NA	NA	NA	NA	NA	NA	NA	NA	NA	NA	NA	NA	NA	NA	NA	NA	NA	NA	NA	NA	NA	NA	NA	NA	NA	NA	NA	NA	NA	NA	grazed	0	0	0	0	0
NA	2015_13_02	2015_13_02_3_2	NA	NA	NA	NA	NA	NA	NA	NA	NA	NA	NA	NA	NA	NA	NA	NA	NA	NA	NA	NA	NA	NA	NA	NA	NA	NA	NA	NA	NA	NA	NA	NA	NA	NA	NA	NA	NA	NA	NA	NA	NA	avoided	0	0	0	0	0
NA	2015_13_02	2015_13_02_4_1	NA	NA	NA	NA	NA	NA	NA	NA	NA	NA	NA	NA	NA	NA	NA	NA	NA	NA	NA	NA	NA	NA	NA	NA	NA	NA	NA	NA	NA	NA	NA	NA	NA	NA	NA	NA	NA	NA	NA	NA	NA	grazed	0	0	0	0	0
NA	2015_13_02	2015_13_02_4_2	NA	NA	NA	NA	NA	NA	NA	NA	NA	NA	NA	NA	NA	NA	NA	NA	NA	NA	NA	NA	NA	NA	NA	NA	NA	NA	NA	NA	NA	NA	NA	NA	NA	NA	NA	NA	NA	NA	NA	NA	NA	avoided	0	0	0	0	0
NA	2015_13_03	2015_13_03_1_1	NA	NA	NA	NA	NA	NA	NA	NA	NA	NA	NA	NA	NA	NA	NA	NA	NA	NA	NA	NA	NA	NA	NA	NA	NA	NA	NA	NA	NA	NA	NA	NA	NA	NA	NA	NA	NA	NA	NA	NA	NA	grazed	0	0	0	0	0
NA	2015_13_03	2015_13_03_1_2	NA	NA	NA	NA	NA	NA	NA	NA	NA	NA	NA	NA	NA	NA	NA	NA	NA	NA	NA	NA	NA	NA	NA	NA	NA	NA	NA	NA	NA	NA	NA	NA	NA	NA	NA	NA	NA	NA	NA	NA	NA	avoided	0	0	0	0	0
NA	2015_13_03	2015_13_03_2_1	NA	NA	NA	NA	NA	NA	NA	NA	NA	NA	NA	NA	NA	NA	NA	NA	NA	NA	NA	NA	NA	NA	NA	NA	NA	NA	NA	NA	NA	NA	NA	NA	NA	NA	NA	NA	NA	NA	NA	NA	NA	grazed	0	0	0	0	0
NA	2015_13_03	2015_13_03_2_2	NA	NA	NA	NA	NA	NA	NA	NA	NA	NA	NA	NA	NA	NA	NA	NA	NA	NA	NA	NA	NA	NA	NA	NA	NA	NA	NA	NA	NA	NA	NA	NA	NA	NA	NA	NA	NA	NA	NA	NA	NA	avoided	0	0	0	0	0
NA	2015_13_03	2015_13_03_3_1	NA	NA	NA	NA	NA	NA	NA	NA	NA	NA	NA	NA	NA	NA	NA	NA	NA	NA	NA	NA	NA	NA	NA	NA	NA	NA	NA	NA	NA	NA	NA	NA	NA	NA	NA	NA	NA	NA	NA	NA	NA	grazed	0	0	0	0	0
NA	2015_13_03	2015_13_03_3_2	NA	NA	NA	NA	NA	NA	NA	NA	NA	NA	NA	NA	NA	NA	NA	NA	NA	NA	NA	NA	NA	NA	NA	NA	NA	NA	NA	NA	NA	NA	NA	NA	NA	NA	NA	NA	NA	NA	NA	NA	NA	avoided	0	0	0	0	0
NA	2015_13_03	2015_13_03_4_1	NA	NA	NA	NA	NA	NA	NA	NA	NA	NA	NA	NA	NA	NA	NA	NA	NA	NA	NA	NA	NA	NA	NA	NA	NA	NA	NA	NA	NA	NA	NA	NA	NA	NA	NA	NA	NA	NA	NA	NA	NA	grazed	0	0	0	0	0
NA	2015_13_03	2015_13_03_4_2	NA	NA	NA	NA	NA	NA	NA	NA	NA	NA	NA	NA	NA	NA	NA	NA	NA	NA	NA	NA	NA	NA	NA	NA	NA	NA	NA	NA	NA	NA	NA	NA	NA	NA	NA	NA	NA	NA	NA	NA	NA	avoided	0	0	0	0	0
NA	2015_13_04	2015_13_04_1_1	NA	NA	NA	NA	NA	NA	NA	NA	NA	NA	NA	NA	NA	NA	NA	NA	NA	NA	NA	NA	NA	NA	NA	NA	NA	NA	NA	NA	NA	NA	NA	NA	NA	NA	NA	NA	NA	NA	NA	NA	NA	grazed	0	0	0	0	0
NA	2015_13_04	2015_13_04_1_2	NA	NA	NA	NA	NA	NA	NA	NA	NA	NA	NA	NA	NA	NA	NA	NA	NA	NA	NA	NA	NA	NA	NA	NA	NA	NA	NA	NA	NA	NA	NA	NA	NA	NA	NA	NA	NA	NA	NA	NA	NA	avoided	0	0	0	0	0
NA	2015_13_04	2015_13_04_2_1	NA	NA	NA	NA	NA	NA	NA	NA	NA	NA	NA	NA	NA	NA	NA	NA	NA	NA	NA	NA	NA	NA	NA	NA	NA	NA	NA	NA	NA	NA	NA	NA	NA	NA	NA	NA	NA	NA	NA	NA	NA	grazed	0	0	0	0	0
NA	2015_13_04	2015_13_04_2_2	NA	NA	NA	NA	NA	NA	NA	NA	NA	NA	NA	NA	NA	NA	NA	NA	NA	NA	NA	NA	NA	NA	NA	NA	NA	NA	NA	NA	NA	NA	NA	NA	NA	NA	NA	NA	NA	NA	NA	NA	NA	avoided	0	0	0	0	0
NA	2015_13_04	2015_13_04_3_1	NA	NA	NA	NA	NA	NA	NA	NA	NA	NA	NA	NA	NA	NA	NA	NA	NA	NA	NA	NA	NA	NA	NA	NA	NA	NA	NA	NA	NA	NA	NA	NA	NA	NA	NA	NA	NA	NA	NA	NA	NA	grazed	0	0	0	0	0
NA	2015_13_04	2015_13_04_3_2	NA	NA	NA	NA	NA	NA	NA	NA	NA	NA	NA	NA	NA	NA	NA	NA	NA	NA	NA	NA	NA	NA	NA	NA	NA	NA	NA	NA	NA	NA	NA	NA	NA	NA	NA	NA	NA	NA	NA	NA	NA	avoided	0	0	0	0	0
NA	2015_13_04	2015_13_04_4_1	NA	NA	NA	NA	NA	NA	NA	NA	NA	NA	NA	NA	NA	NA	NA	NA	NA	NA	NA	NA	NA	NA	NA	NA	NA	NA	NA	NA	NA	NA	NA	NA	NA	NA	NA	NA	NA	NA	NA	NA	NA	grazed	0	0	0	0	0
NA	2015_13_04	2015_13_04_4_2	NA	NA	NA	NA	NA	NA	NA	NA	NA	NA	NA	NA	NA	NA	NA	NA	NA	NA	NA	NA	NA	NA	NA	NA	NA	NA	NA	NA	NA	NA	NA	NA	NA	NA	NA	NA	NA	NA	NA	NA	NA	avoided	0	0	0	0	0
2015_14	2015_14_01	2015_14_01_1_1	FE	F	E	165	165	196.1	165	1	1	8	0	1	1	1	0	1	0	0	0	0	0	20.8125	0.9375	21.75	11	3	14	21	3	24	12.25	1	0	1	8	4	4	0.666666667	3	4	7	grazed	0	0	0	0	0
2015_14	2015_14_01	2015_14_01_1_2	FE	F	E	165	165	196.1	165	1	1	8	0	1	1	1	0	1	0	0	0	0	0	20.8125	0.9375	21.75	11	3	14	21	3	24	12.25	1	0	1	8	4	4	0.666666667	3	4	7	avoided	0	0	0	0	0
2015_14	2015_14_01	2015_14_01_2_1	FE	F	E	165	165	196.1	165	1	1	8	0	1	1	1	0	1	0	0	0	0	0	20.8125	0.9375	21.75	11	3	14	21	3	24	12.25	1	0	1	8	4	4	0.666666667	3	4	7	grazed	1	0	0	0	0
2015_14	2015_14_01	2015_14_01_2_2	FE	F	E	165	165	196.1	165	1	1	8	0	1	1	1	0	1	0	0	0	0	0	20.8125	0.9375	21.75	11	3	14	21	3	24	12.25	1	0	1	8	4	4	0.666666667	3	4	7	avoided	0	0	0	0	0
2015_14	2015_14_01	2015_14_01_3_1	FE	F	E	165	165	196.1	165	1	1	8	0	1	1	1	0	1	0	0	0	0	0	20.8125	0.9375	21.75	11	3	14	21	3	24	12.25	1	0	1	8	4	4	0.666666667	3	4	7	grazed	0	0	0	0	0
2015_14	2015_14_01	2015_14_01_3_2	FE	F	E	165	165	196.1	165	1	1	8	0	1	1	1	0	1	0	0	0	0	0	20.8125	0.9375	21.75	11	3	14	21	3	24	12.25	1	0	1	8	4	4	0.666666667	3	4	7	avoided	0	0	0	0	0
2015_14	2015_14_01	2015_14_01_4_1	FE	F	E	165	165	196.1	165	1	1	8	0	1	1	1	0	1	0	0	0	0	0	20.8125	0.9375	21.75	11	3	14	21	3	24	12.25	1	0	1	8	4	4	0.666666667	3	4	7	grazed	0	0	0	0	0
2015_14	2015_14_01	2015_14_01_4_2	FE	F	E	165	165	196.1	165	1	1	8	0	1	1	1	0	1	0	0	0	0	0	20.8125	0.9375	21.75	11	3	14	21	3	24	12.25	1	0	1	8	4	4	0.666666667	3	4	7	avoided	0	0	0	0	0
NA	2015_14_02	2015_14_02_1_1	NA	NA	NA	NA	NA	NA	NA	NA	NA	NA	NA	NA	NA	NA	NA	NA	NA	NA	NA	NA	NA	NA	NA	NA	NA	NA	NA	NA	NA	NA	NA	NA	NA	NA	NA	NA	NA	NA	NA	NA	NA	grazed	0	0	0	0	0
NA	2015_14_02	2015_14_02_1_2	NA	NA	NA	NA	NA	NA	NA	NA	NA	NA	NA	NA	NA	NA	NA	NA	NA	NA	NA	NA	NA	NA	NA	NA	NA	NA	NA	NA	NA	NA	NA	NA	NA	NA	NA	NA	NA	NA	NA	NA	NA	avoided	0	0	0	0	0
NA	2015_14_02	2015_14_02_2_1	NA	NA	NA	NA	NA	NA	NA	NA	NA	NA	NA	NA	NA	NA	NA	NA	NA	NA	NA	NA	NA	NA	NA	NA	NA	NA	NA	NA	NA	NA	NA	NA	NA	NA	NA	NA	NA	NA	NA	NA	NA	grazed	0	0	0	0	0
NA	2015_14_02	2015_14_02_2_2	NA	NA	NA	NA	NA	NA	NA	NA	NA	NA	NA	NA	NA	NA	NA	NA	NA	NA	NA	NA	NA	NA	NA	NA	NA	NA	NA	NA	NA	NA	NA	NA	NA	NA	NA	NA	NA	NA	NA	NA	NA	avoided	0	0	0	0	0
NA	2015_14_02	2015_14_02_3_1	NA	NA	NA	NA	NA	NA	NA	NA	NA	NA	NA	NA	NA	NA	NA	NA	NA	NA	NA	NA	NA	NA	NA	NA	NA	NA	NA	NA	NA	NA	NA	NA	NA	NA	NA	NA	NA	NA	NA	NA	NA	grazed	0	0	0	0	0
NA	2015_14_02	2015_14_02_3_2	NA	NA	NA	NA	NA	NA	NA	NA	NA	NA	NA	NA	NA	NA	NA	NA	NA	NA	NA	NA	NA	NA	NA	NA	NA	NA	NA	NA	NA	NA	NA	NA	NA	NA	NA	NA	NA	NA	NA	NA	NA	avoided	0	0	0	0	0
NA	2015_14_02	2015_14_02_4_1	NA	NA	NA	NA	NA	NA	NA	NA	NA	NA	NA	NA	NA	NA	NA	NA	NA	NA	NA	NA	NA	NA	NA	NA	NA	NA	NA	NA	NA	NA	NA	NA	NA	NA	NA	NA	NA	NA	NA	NA	NA	grazed	0	0	0	0	0
NA	2015_14_02	2015_14_02_4_2	NA	NA	NA	NA	NA	NA	NA	NA	NA	NA	NA	NA	NA	NA	NA	NA	NA	NA	NA	NA	NA	NA	NA	NA	NA	NA	NA	NA	NA	NA	NA	NA	NA	NA	NA	NA	NA	NA	NA	NA	NA	avoided	0	0	0	0	0
2015_14	2015_14_03	2015_14_03_1_1	FE	F	E	165	165	196.1	165	1	1	8	0	1	1	1	0	0	0	0	0	0	1	11.125	0	11.125	10	0	10	21	3	24	12.25	0	1	1	8	4	4	0.75	2	2	6	grazed	0	0	0	0	0
2015_14	2015_14_03	2015_14_03_1_2	FE	F	E	165	165	196.1	165	1	1	8	0	1	1	1	0	0	0	0	0	0	1	11.125	0	11.125	10	0	10	21	3	24	12.25	0	1	1	8	4	4	0.75	2	2	6	avoided	0	0	0	0	0
2015_14	2015_14_03	2015_14_03_2_1	FE	F	E	165	165	196.1	165	1	1	8	0	1	1	1	0	0	0	0	0	0	1	11.125	0	11.125	10	0	10	21	3	24	12.25	0	1	1	8	4	4	0.75	2	2	6	grazed	0	0	0	0	0
2015_14	2015_14_03	2015_14_03_2_2	FE	F	E	165	165	196.1	165	1	1	8	0	1	1	1	0	0	0	0	0	0	1	11.125	0	11.125	10	0	10	21	3	24	12.25	0	1	1	8	4	4	0.75	2	2	6	avoided	0	0	0	0	0
2015_14	2015_14_03	2015_14_03_3_1	FE	F	E	165	165	196.1	165	1	1	8	0	1	1	1	0	0	0	0	0	0	1	11.125	0	11.125	10	0	10	21	3	24	12.25	0	1	1	8	4	4	0.75	2	2	6	grazed	0	0	0	0	0
2015_14	2015_14_03	2015_14_03_3_2	FE	F	E	165	165	196.1	165	1	1	8	0	1	1	1	0	0	0	0	0	0	1	11.125	0	11.125	10	0	10	21	3	24	12.25	0	1	1	8	4	4	0.75	2	2	6	avoided	0	0	0	0	0
2015_14	2015_14_03	2015_14_03_4_1	FE	F	E	165	165	196.1	165	1	1	8	0	1	1	1	0	0	0	0	0	0	1	11.125	0	11.125	10	0	10	21	3	24	12.25	0	1	1	8	4	4	0.75	2	2	6	grazed	0	0	0	0	0
2015_14	2015_14_03	2015_14_03_4_2	FE	F	E	165	165	196.1	165	1	1	8	0	1	1	1	0	0	0	0	0	0	1	11.125	0	11.125	10	0	10	21	3	24	12.25	0	1	1	8	4	4	0.75	2	2	6	avoided	0	0	0	0	0
2015_14	2015_14_04	2015_14_04_1_1	FE	F	E	165	165	196.1	165	1	1	8	0	1	1	1	0	0	0	0	0	0	1	16.5625	0.5625	17.125	12	2	14	21	3	24	12.25	1	0	1	8	5	3	0.444444444	6	4	4	grazed	0	0	0	0	0
2015_14	2015_14_04	2015_14_04_1_2	FE	F	E	165	165	196.1	165	1	1	8	0	1	1	1	0	0	0	0	0	0	1	16.5625	0.5625	17.125	12	2	14	21	3	24	12.25	1	0	1	8	5	3	0.444444444	6	4	4	avoided	0	0	0	0	0
2015_14	2015_14_04	2015_14_04_2_1	FE	F	E	165	165	196.1	165	1	1	8	0	1	1	1	0	0	0	0	0	0	1	16.5625	0.5625	17.125	12	2	14	21	3	24	12.25	1	0	1	8	5	3	0.444444444	6	4	4	grazed	0	0	0	0	0
2015_14	2015_14_04	2015_14_04_2_2	FE	F	E	165	165	196.1	165	1	1	8	0	1	1	1	0	0	0	0	0	0	1	16.5625	0.5625	17.125	12	2	14	21	3	24	12.25	1	0	1	8	5	3	0.444444444	6	4	4	avoided	0	0	0	0	0
2015_14	2015_14_04	2015_14_04_3_1	FE	F	E	165	165	196.1	165	1	1	8	0	1	1	1	0	0	0	0	0	0	1	16.5625	0.5625	17.125	12	2	14	21	3	24	12.25	1	0	1	8	5	3	0.444444444	6	4	4	grazed	0	0	0	0	0
2015_14	2015_14_04	2015_14_04_3_2	FE	F	E	165	165	196.1	165	1	1	8	0	1	1	1	0	0	0	0	0	0	1	16.5625	0.5625	17.125	12	2	14	21	3	24	12.25	1	0	1	8	5	3	0.444444444	6	4	4	avoided	0	0	0	0	0
2015_14	2015_14_04	2015_14_04_4_1	FE	F	E	165	165	196.1	165	1	1	8	0	1	1	1	0	0	0	0	0	0	1	16.5625	0.5625	17.125	12	2	14	21	3	24	12.25	1	0	1	8	5	3	0.444444444	6	4	4	grazed	0	0	0	0	0
2015_14	2015_14_04	2015_14_04_4_2	FE	F	E	165	165	196.1	165	1	1	8	0	1	1	1	0	0	0	0	0	0	1	16.5625	0.5625	17.125	12	2	14	21	3	24	12.25	1	0	1	8	5	3	0.444444444	6	4	4	avoided	0	0	0	0	0
NA	2015_15_01	2015_15_01_1_1	NA	NA	NA	NA	NA	NA	NA	NA	NA	NA	NA	NA	NA	NA	NA	NA	NA	NA	NA	NA	NA	NA	NA	NA	NA	NA	NA	NA	NA	NA	NA	NA	NA	NA	NA	NA	NA	NA	NA	NA	NA	grazed	0	0	0	0	0
NA	2015_15_01	2015_15_01_1_2	NA	NA	NA	NA	NA	NA	NA	NA	NA	NA	NA	NA	NA	NA	NA	NA	NA	NA	NA	NA	NA	NA	NA	NA	NA	NA	NA	NA	NA	NA	NA	NA	NA	NA	NA	NA	NA	NA	NA	NA	NA	avoided	0	0	0	0	0
NA	2015_15_01	2015_15_01_2_1	NA	NA	NA	NA	NA	NA	NA	NA	NA	NA	NA	NA	NA	NA	NA	NA	NA	NA	NA	NA	NA	NA	NA	NA	NA	NA	NA	NA	NA	NA	NA	NA	NA	NA	NA	NA	NA	NA	NA	NA	NA	grazed	0	0	0	0	0
NA	2015_15_01	2015_15_01_2_2	NA	NA	NA	NA	NA	NA	NA	NA	NA	NA	NA	NA	NA	NA	NA	NA	NA	NA	NA	NA	NA	NA	NA	NA	NA	NA	NA	NA	NA	NA	NA	NA	NA	NA	NA	NA	NA	NA	NA	NA	NA	avoided	0	0	0	0	0
NA	2015_15_01	2015_15_01_3_1	NA	NA	NA	NA	NA	NA	NA	NA	NA	NA	NA	NA	NA	NA	NA	NA	NA	NA	NA	NA	NA	NA	NA	NA	NA	NA	NA	NA	NA	NA	NA	NA	NA	NA	NA	NA	NA	NA	NA	NA	NA	grazed	0	0	0	0	0
NA	2015_15_01	2015_15_01_3_2	NA	NA	NA	NA	NA	NA	NA	NA	NA	NA	NA	NA	NA	NA	NA	NA	NA	NA	NA	NA	NA	NA	NA	NA	NA	NA	NA	NA	NA	NA	NA	NA	NA	NA	NA	NA	NA	NA	NA	NA	NA	avoided	0	0	0	0	0
NA	2015_15_01	2015_15_01_4_1	NA	NA	NA	NA	NA	NA	NA	NA	NA	NA	NA	NA	NA	NA	NA	NA	NA	NA	NA	NA	NA	NA	NA	NA	NA	NA	NA	NA	NA	NA	NA	NA	NA	NA	NA	NA	NA	NA	NA	NA	NA	grazed	0	0	0	0	0
NA	2015_15_01	2015_15_01_4_2	NA	NA	NA	NA	NA	NA	NA	NA	NA	NA	NA	NA	NA	NA	NA	NA	NA	NA	NA	NA	NA	NA	NA	NA	NA	NA	NA	NA	NA	NA	NA	NA	NA	NA	NA	NA	NA	NA	NA	NA	NA	avoided	0	0	0	0	0
2015_15	2015_15_02	2015_15_02_1_1	FE	F	E	300	110	30	40	0.366666667	0.133333333	3.5	0	1	0	1	0	1	0	0	0	1	0	16.25	8.75	25	9	2	11	18	3	21	11.25	1	2	3	5	3	2	0.307692308	7	2	2	grazed	0	0	0	0	0
2015_15	2015_15_02	2015_15_02_1_2	FE	F	E	300	110	30	40	0.366666667	0.133333333	3.5	0	1	0	1	0	1	0	0	0	1	0	16.25	8.75	25	9	2	11	18	3	21	11.25	1	2	3	5	3	2	0.307692308	7	2	2	avoided	0	0	0	0	0
2015_15	2015_15_02	2015_15_02_2_1	FE	F	E	300	110	30	40	0.366666667	0.133333333	3.5	0	1	0	1	0	1	0	0	0	1	0	16.25	8.75	25	9	2	11	18	3	21	11.25	1	2	3	5	3	2	0.307692308	7	2	2	grazed	0	0	0	0	0
2015_15	2015_15_02	2015_15_02_2_2	FE	F	E	300	110	30	40	0.366666667	0.133333333	3.5	0	1	0	1	0	1	0	0	0	1	0	16.25	8.75	25	9	2	11	18	3	21	11.25	1	2	3	5	3	2	0.307692308	7	2	2	avoided	0	0	0	0	0
2015_15	2015_15_02	2015_15_02_3_1	FE	F	E	300	110	30	40	0.366666667	0.133333333	3.5	0	1	0	1	0	1	0	0	0	1	0	16.25	8.75	25	9	2	11	18	3	21	11.25	1	2	3	5	3	2	0.307692308	7	2	2	grazed	0	0	0	0	0
2015_15	2015_15_02	2015_15_02_3_2	FE	F	E	300	110	30	40	0.366666667	0.133333333	3.5	0	1	0	1	0	1	0	0	0	1	0	16.25	8.75	25	9	2	11	18	3	21	11.25	1	2	3	5	3	2	0.307692308	7	2	2	avoided	0	0	0	0	0
2015_15	2015_15_02	2015_15_02_4_1	FE	F	E	300	110	30	40	0.366666667	0.133333333	3.5	0	1	0	1	0	1	0	0	0	1	0	16.25	8.75	25	9	2	11	18	3	21	11.25	1	2	3	5	3	2	0.307692308	7	2	2	grazed	0	0	0	0	0
2015_15	2015_15_02	2015_15_02_4_2	FE	F	E	300	110	30	40	0.366666667	0.133333333	3.5	0	1	0	1	0	1	0	0	0	1	0	16.25	8.75	25	9	2	11	18	3	21	11.25	1	2	3	5	3	2	0.307692308	7	2	2	avoided	0	0	0	0	0
NA	2015_15_03	2015_15_03_1_1	NA	NA	NA	NA	NA	NA	NA	NA	NA	NA	NA	NA	NA	NA	NA	NA	NA	NA	NA	NA	NA	NA	NA	NA	NA	NA	NA	NA	NA	NA	NA	NA	NA	NA	NA	NA	NA	NA	NA	NA	NA	grazed	0	0	0	0	0
NA	2015_15_03	2015_15_03_1_2	NA	NA	NA	NA	NA	NA	NA	NA	NA	NA	NA	NA	NA	NA	NA	NA	NA	NA	NA	NA	NA	NA	NA	NA	NA	NA	NA	NA	NA	NA	NA	NA	NA	NA	NA	NA	NA	NA	NA	NA	NA	avoided	0	0	0	0	0
NA	2015_15_03	2015_15_03_2_1	NA	NA	NA	NA	NA	NA	NA	NA	NA	NA	NA	NA	NA	NA	NA	NA	NA	NA	NA	NA	NA	NA	NA	NA	NA	NA	NA	NA	NA	NA	NA	NA	NA	NA	NA	NA	NA	NA	NA	NA	NA	grazed	0	0	0	0	0
NA	2015_15_03	2015_15_03_2_2	NA	NA	NA	NA	NA	NA	NA	NA	NA	NA	NA	NA	NA	NA	NA	NA	NA	NA	NA	NA	NA	NA	NA	NA	NA	NA	NA	NA	NA	NA	NA	NA	NA	NA	NA	NA	NA	NA	NA	NA	NA	avoided	0	0	0	0	0
NA	2015_15_03	2015_15_03_3_1	NA	NA	NA	NA	NA	NA	NA	NA	NA	NA	NA	NA	NA	NA	NA	NA	NA	NA	NA	NA	NA	NA	NA	NA	NA	NA	NA	NA	NA	NA	NA	NA	NA	NA	NA	NA	NA	NA	NA	NA	NA	grazed	0	0	0	0	0
NA	2015_15_03	2015_15_03_3_2	NA	NA	NA	NA	NA	NA	NA	NA	NA	NA	NA	NA	NA	NA	NA	NA	NA	NA	NA	NA	NA	NA	NA	NA	NA	NA	NA	NA	NA	NA	NA	NA	NA	NA	NA	NA	NA	NA	NA	NA	NA	avoided	0	0	0	0	0
NA	2015_15_03	2015_15_03_4_1	NA	NA	NA	NA	NA	NA	NA	NA	NA	NA	NA	NA	NA	NA	NA	NA	NA	NA	NA	NA	NA	NA	NA	NA	NA	NA	NA	NA	NA	NA	NA	NA	NA	NA	NA	NA	NA	NA	NA	NA	NA	grazed	0	0	0	0	0
NA	2015_15_03	2015_15_03_4_2	NA	NA	NA	NA	NA	NA	NA	NA	NA	NA	NA	NA	NA	NA	NA	NA	NA	NA	NA	NA	NA	NA	NA	NA	NA	NA	NA	NA	NA	NA	NA	NA	NA	NA	NA	NA	NA	NA	NA	NA	NA	avoided	0	0	0	0	0
2015_15	2015_15_04	2015_15_04_1_1	FE	F	E	300	110	30	40	0.366666667	0.133333333	3.5	0	1	0	1	0	1	0	0	0	1	0	28.125	8.875	37	10	1	11	18	3	21	11.25	0	3	3	5	3	2	0.533333333	1	6	4	grazed	0	0	0	0	0
2015_15	2015_15_04	2015_15_04_1_2	FE	F	E	300	110	30	40	0.366666667	0.133333333	3.5	0	1	0	1	0	1	0	0	0	1	0	28.125	8.875	37	10	1	11	18	3	21	11.25	0	3	3	5	3	2	0.533333333	1	6	4	avoided	0	0	0	0	0
2015_15	2015_15_04	2015_15_04_2_1	FE	F	E	300	110	30	40	0.366666667	0.133333333	3.5	0	1	0	1	0	1	0	0	0	1	0	28.125	8.875	37	10	1	11	18	3	21	11.25	0	3	3	5	3	2	0.533333333	1	6	4	grazed	0	0	0	0	0
2015_15	2015_15_04	2015_15_04_2_2	FE	F	E	300	110	30	40	0.366666667	0.133333333	3.5	0	1	0	1	0	1	0	0	0	1	0	28.125	8.875	37	10	1	11	18	3	21	11.25	0	3	3	5	3	2	0.533333333	1	6	4	avoided	0	0	0	0	0
2015_15	2015_15_04	2015_15_04_3_1	FE	F	E	300	110	30	40	0.366666667	0.133333333	3.5	0	1	0	1	0	1	0	0	0	1	0	28.125	8.875	37	10	1	11	18	3	21	11.25	0	3	3	5	3	2	0.533333333	1	6	4	grazed	0	0	0	0	0
2015_15	2015_15_04	2015_15_04_3_2	FE	F	E	300	110	30	40	0.366666667	0.133333333	3.5	0	1	0	1	0	1	0	0	0	1	0	28.125	8.875	37	10	1	11	18	3	21	11.25	0	3	3	5	3	2	0.533333333	1	6	4	avoided	0	0	0	0	0
2015_15	2015_15_04	2015_15_04_4_1	FE	F	E	300	110	30	40	0.366666667	0.133333333	3.5	0	1	0	1	0	1	0	0	0	1	0	28.125	8.875	37	10	1	11	18	3	21	11.25	0	3	3	5	3	2	0.533333333	1	6	4	grazed	0	0	0	0	0
2015_15	2015_15_04	2015_15_04_4_2	FE	F	E	300	110	30	40	0.366666667	0.133333333	3.5	0	1	0	1	0	1	0	0	0	1	0	28.125	8.875	37	10	1	11	18	3	21	11.25	0	3	3	5	3	2	0.533333333	1	6	4	avoided	1	0	0	0	0
2015_16	2015_16_01	2015_16_01_1_1	FE	F	E	124	34	58	NA	0.274193548	NA	2.5	0	0	1	1	0	1	0	0	1	1	0	11.625	1.25	12.875	14	3	17	24	3	27	14.5	7	0	7	9	5	4	0.692307692	6	2	9	grazed	1	0	0	0	0
2015_16	2015_16_01	2015_16_01_1_2	FE	F	E	124	34	58	NA	0.274193548	NA	2.5	0	0	1	1	0	1	0	0	1	1	0	11.625	1.25	12.875	14	3	17	24	3	27	14.5	7	0	7	9	5	4	0.692307692	6	2	9	avoided	0	0	0	0	0
2015_16	2015_16_01	2015_16_01_2_1	FE	F	E	124	34	58	NA	0.274193548	NA	2.5	0	0	1	1	0	1	0	0	1	1	0	11.625	1.25	12.875	14	3	17	24	3	27	14.5	7	0	7	9	5	4	0.692307692	6	2	9	grazed	1	0	0	0	0
2015_16	2015_16_01	2015_16_01_2_2	FE	F	E	124	34	58	NA	0.274193548	NA	2.5	0	0	1	1	0	1	0	0	1	1	0	11.625	1.25	12.875	14	3	17	24	3	27	14.5	7	0	7	9	5	4	0.692307692	6	2	9	avoided	0	0	0	0	0
2015_16	2015_16_01	2015_16_01_3_1	FE	F	E	124	34	58	NA	0.274193548	NA	2.5	0	0	1	1	0	1	0	0	1	1	0	11.625	1.25	12.875	14	3	17	24	3	27	14.5	7	0	7	9	5	4	0.692307692	6	2	9	grazed	1	0	0	0	0
2015_16	2015_16_01	2015_16_01_3_2	FE	F	E	124	34	58	NA	0.274193548	NA	2.5	0	0	1	1	0	1	0	0	1	1	0	11.625	1.25	12.875	14	3	17	24	3	27	14.5	7	0	7	9	5	4	0.692307692	6	2	9	avoided	1	0	0	0	0
2015_16	2015_16_01	2015_16_01_4_1	FE	F	E	124	34	58	NA	0.274193548	NA	2.5	0	0	1	1	0	1	0	0	1	1	0	11.625	1.25	12.875	14	3	17	24	3	27	14.5	7	0	7	9	5	4	0.692307692	6	2	9	grazed	1	0	0	0	0
2015_16	2015_16_01	2015_16_01_4_2	FE	F	E	124	34	58	NA	0.274193548	NA	2.5	0	0	1	1	0	1	0	0	1	1	0	11.625	1.25	12.875	14	3	17	24	3	27	14.5	7	0	7	9	5	4	0.692307692	6	2	9	avoided	1	0	0	0	0
2015_16	2015_16_02	2015_16_02_1_1	FE	F	E	124	34	58	NA	0.274193548	NA	2.5	0	1	1	1	1	1	0	0	1	1	1	7.5	1.25	8.75	11	1	12	24	3	27	14.5	1	6	7	9	6	3	0.666666667	3	3	6	grazed	0	0	0	0	0
2015_16	2015_16_02	2015_16_02_1_2	FE	F	E	124	34	58	NA	0.274193548	NA	2.5	0	1	1	1	1	1	0	0	1	1	1	7.5	1.25	8.75	11	1	12	24	3	27	14.5	1	6	7	9	6	3	0.666666667	3	3	6	avoided	0	0	0	0	0
2015_16	2015_16_02	2015_16_02_2_1	FE	F	E	124	34	58	NA	0.274193548	NA	2.5	0	1	1	1	1	1	0	0	1	1	1	7.5	1.25	8.75	11	1	12	24	3	27	14.5	1	6	7	9	6	3	0.666666667	3	3	6	grazed	0	0	0	0	0
2015_16	2015_16_02	2015_16_02_2_2	FE	F	E	124	34	58	NA	0.274193548	NA	2.5	0	1	1	1	1	1	0	0	1	1	1	7.5	1.25	8.75	11	1	12	24	3	27	14.5	1	6	7	9	6	3	0.666666667	3	3	6	avoided	0	0	0	0	0
2015_16	2015_16_02	2015_16_02_3_1	FE	F	E	124	34	58	NA	0.274193548	NA	2.5	0	1	1	1	1	1	0	0	1	1	1	7.5	1.25	8.75	11	1	12	24	3	27	14.5	1	6	7	9	6	3	0.666666667	3	3	6	grazed	0	0	0	0	0
2015_16	2015_16_02	2015_16_02_3_2	FE	F	E	124	34	58	NA	0.274193548	NA	2.5	0	1	1	1	1	1	0	0	1	1	1	7.5	1.25	8.75	11	1	12	24	3	27	14.5	1	6	7	9	6	3	0.666666667	3	3	6	avoided	0	0	0	0	0
2015_16	2015_16_02	2015_16_02_4_1	FE	F	E	124	34	58	NA	0.274193548	NA	2.5	0	1	1	1	1	1	0	0	1	1	1	7.5	1.25	8.75	11	1	12	24	3	27	14.5	1	6	7	9	6	3	0.666666667	3	3	6	grazed	0	0	0	0	0
2015_16	2015_16_02	2015_16_02_4_2	FE	F	E	124	34	58	NA	0.274193548	NA	2.5	0	1	1	1	1	1	0	0	1	1	1	7.5	1.25	8.75	11	1	12	24	3	27	14.5	1	6	7	9	6	3	0.666666667	3	3	6	avoided	0	0	0	0	0
2015_16	2015_16_03	2015_16_03_1_1	FE	F	E	124	34	58	NA	0.274193548	NA	2.5	0	1	1	1	1	1	0	0	1	1	0	6.375	0	6.375	11	0	11	24	3	27	14.5	1	6	7	9	7	2	0.428571429	2	6	3	grazed	0	0	0	0	0
2015_16	2015_16_03	2015_16_03_1_2	FE	F	E	124	34	58	NA	0.274193548	NA	2.5	0	1	1	1	1	1	0	0	1	1	0	6.375	0	6.375	11	0	11	24	3	27	14.5	1	6	7	9	7	2	0.428571429	2	6	3	avoided	0	0	0	0	0
2015_16	2015_16_03	2015_16_03_2_1	FE	F	E	124	34	58	NA	0.274193548	NA	2.5	0	1	1	1	1	1	0	0	1	1	0	6.375	0	6.375	11	0	11	24	3	27	14.5	1	6	7	9	7	2	0.428571429	2	6	3	grazed	0	0	0	0	0
2015_16	2015_16_03	2015_16_03_2_2	FE	F	E	124	34	58	NA	0.274193548	NA	2.5	0	1	1	1	1	1	0	0	1	1	0	6.375	0	6.375	11	0	11	24	3	27	14.5	1	6	7	9	7	2	0.428571429	2	6	3	avoided	0	0	0	0	0
2015_16	2015_16_03	2015_16_03_3_1	FE	F	E	124	34	58	NA	0.274193548	NA	2.5	0	1	1	1	1	1	0	0	1	1	0	6.375	0	6.375	11	0	11	24	3	27	14.5	1	6	7	9	7	2	0.428571429	2	6	3	grazed	0	0	0	0	0
2015_16	2015_16_03	2015_16_03_3_2	FE	F	E	124	34	58	NA	0.274193548	NA	2.5	0	1	1	1	1	1	0	0	1	1	0	6.375	0	6.375	11	0	11	24	3	27	14.5	1	6	7	9	7	2	0.428571429	2	6	3	avoided	0	0	0	1	0
2015_16	2015_16_03	2015_16_03_4_1	FE	F	E	124	34	58	NA	0.274193548	NA	2.5	0	1	1	1	1	1	0	0	1	1	0	6.375	0	6.375	11	0	11	24	3	27	14.5	1	6	7	9	7	2	0.428571429	2	6	3	grazed	0	0	0	0	0
2015_16	2015_16_03	2015_16_03_4_2	FE	F	E	124	34	58	NA	0.274193548	NA	2.5	0	1	1	1	1	1	0	0	1	1	0	6.375	0	6.375	11	0	11	24	3	27	14.5	1	6	7	9	7	2	0.428571429	2	6	3	avoided	0	0	0	0	0
2015_16	2015_16_04	2015_16_04_1_1	FE	F	E	124	34	58	NA	0.274193548	NA	2.5	0	0	1	1	0	1	0	0	0	1	1	14	0.25	14.25	9	1	10	24	3	27	14.5	3	4	7	9	2	7	0.571428571	5	1	4	grazed	0	0	0	0	0
2015_16	2015_16_04	2015_16_04_1_2	FE	F	E	124	34	58	NA	0.274193548	NA	2.5	0	0	1	1	0	1	0	0	0	1	1	14	0.25	14.25	9	1	10	24	3	27	14.5	3	4	7	9	2	7	0.571428571	5	1	4	avoided	0	0	0	0	0
2015_16	2015_16_04	2015_16_04_2_1	FE	F	E	124	34	58	NA	0.274193548	NA	2.5	0	0	1	1	0	1	0	0	0	1	1	14	0.25	14.25	9	1	10	24	3	27	14.5	3	4	7	9	2	7	0.571428571	5	1	4	grazed	0	0	0	0	0
2015_16	2015_16_04	2015_16_04_2_2	FE	F	E	124	34	58	NA	0.274193548	NA	2.5	0	0	1	1	0	1	0	0	0	1	1	14	0.25	14.25	9	1	10	24	3	27	14.5	3	4	7	9	2	7	0.571428571	5	1	4	avoided	0	0	0	0	0
2015_16	2015_16_04	2015_16_04_3_1	FE	F	E	124	34	58	NA	0.274193548	NA	2.5	0	0	1	1	0	1	0	0	0	1	1	14	0.25	14.25	9	1	10	24	3	27	14.5	3	4	7	9	2	7	0.571428571	5	1	4	grazed	0	0	0	0	0
2015_16	2015_16_04	2015_16_04_3_2	FE	F	E	124	34	58	NA	0.274193548	NA	2.5	0	0	1	1	0	1	0	0	0	1	1	14	0.25	14.25	9	1	10	24	3	27	14.5	3	4	7	9	2	7	0.571428571	5	1	4	avoided	0	0	0	0	0
2015_16	2015_16_04	2015_16_04_4_1	FE	F	E	124	34	58	NA	0.274193548	NA	2.5	0	0	1	1	0	1	0	0	0	1	1	14	0.25	14.25	9	1	10	24	3	27	14.5	3	4	7	9	2	7	0.571428571	5	1	4	grazed	0	0	0	0	0
2015_16	2015_16_04	2015_16_04_4_2	FE	F	E	124	34	58	NA	0.274193548	NA	2.5	0	0	1	1	0	1	0	0	0	1	1	14	0.25	14.25	9	1	10	24	3	27	14.5	3	4	7	9	2	7	0.571428571	5	1	4	avoided	0	0	0	0	0
2015_18	2015_18_01	2015_18_01_1_1	P_WE	P	WE	12.6	3.6	7.5	3.6	0.285714286	0.285714286	1	70	1	1	1	1	1	0	0	0	1	0	25	0	25	5	0	5	6	1	7	3	0	0	0	4	3	1	0.75	1	1	3	grazed	0	0	0	0	0
2015_18	2015_18_01	2015_18_01_1_2	P_WE	P	WE	12.6	3.6	7.5	3.6	0.285714286	0.285714286	1	70	1	1	1	1	1	0	0	0	1	0	25	0	25	5	0	5	6	1	7	3	0	0	0	4	3	1	0.75	1	1	3	avoided	0	0	0	0	0
2015_18	2015_18_01	2015_18_01_2_1	P_WE	P	WE	12.6	3.6	7.5	3.6	0.285714286	0.285714286	1	70	1	1	1	1	1	0	0	0	1	0	25	0	25	5	0	5	6	1	7	3	0	0	0	4	3	1	0.75	1	1	3	grazed	0	0	0	0	0
2015_18	2015_18_01	2015_18_01_2_2	P_WE	P	WE	12.6	3.6	7.5	3.6	0.285714286	0.285714286	1	70	1	1	1	1	1	0	0	0	1	0	25	0	25	5	0	5	6	1	7	3	0	0	0	4	3	1	0.75	1	1	3	avoided	0	0	0	0	0
2015_18	2015_18_01	2015_18_01_3_1	P_WE	P	WE	12.6	3.6	7.5	3.6	0.285714286	0.285714286	1	70	1	1	1	1	1	0	0	0	1	0	25	0	25	5	0	5	6	1	7	3	0	0	0	4	3	1	0.75	1	1	3	grazed	0	0	0	0	0
2015_18	2015_18_01	2015_18_01_3_2	P_WE	P	WE	12.6	3.6	7.5	3.6	0.285714286	0.285714286	1	70	1	1	1	1	1	0	0	0	1	0	25	0	25	5	0	5	6	1	7	3	0	0	0	4	3	1	0.75	1	1	3	avoided	0	0	0	0	0
2015_18	2015_18_01	2015_18_01_4_1	P_WE	P	WE	12.6	3.6	7.5	3.6	0.285714286	0.285714286	1	70	1	1	1	1	1	0	0	0	1	0	25	0	25	5	0	5	6	1	7	3	0	0	0	4	3	1	0.75	1	1	3	grazed	0	0	0	0	0
2015_18	2015_18_01	2015_18_01_4_2	P_WE	P	WE	12.6	3.6	7.5	3.6	0.285714286	0.285714286	1	70	1	1	1	1	1	0	0	0	1	0	25	0	25	5	0	5	6	1	7	3	0	0	0	4	3	1	0.75	1	1	3	avoided	0	0	0	0	0
NA	2015_18_02	2015_18_02_1_1	NA	NA	NA	NA	NA	NA	NA	NA	NA	NA	NA	NA	NA	NA	NA	NA	NA	NA	NA	NA	NA	NA	NA	NA	NA	NA	NA	NA	NA	NA	NA	NA	NA	NA	NA	NA	NA	NA	NA	NA	NA	grazed	0	0	0	0	0
NA	2015_18_02	2015_18_02_1_2	NA	NA	NA	NA	NA	NA	NA	NA	NA	NA	NA	NA	NA	NA	NA	NA	NA	NA	NA	NA	NA	NA	NA	NA	NA	NA	NA	NA	NA	NA	NA	NA	NA	NA	NA	NA	NA	NA	NA	NA	NA	avoided	0	0	0	0	0
NA	2015_18_02	2015_18_02_2_1	NA	NA	NA	NA	NA	NA	NA	NA	NA	NA	NA	NA	NA	NA	NA	NA	NA	NA	NA	NA	NA	NA	NA	NA	NA	NA	NA	NA	NA	NA	NA	NA	NA	NA	NA	NA	NA	NA	NA	NA	NA	grazed	0	0	0	0	0
NA	2015_18_02	2015_18_02_2_2	NA	NA	NA	NA	NA	NA	NA	NA	NA	NA	NA	NA	NA	NA	NA	NA	NA	NA	NA	NA	NA	NA	NA	NA	NA	NA	NA	NA	NA	NA	NA	NA	NA	NA	NA	NA	NA	NA	NA	NA	NA	avoided	0	0	0	0	0
NA	2015_18_02	2015_18_02_3_1	NA	NA	NA	NA	NA	NA	NA	NA	NA	NA	NA	NA	NA	NA	NA	NA	NA	NA	NA	NA	NA	NA	NA	NA	NA	NA	NA	NA	NA	NA	NA	NA	NA	NA	NA	NA	NA	NA	NA	NA	NA	grazed	0	0	0	0	0
NA	2015_18_02	2015_18_02_3_2	NA	NA	NA	NA	NA	NA	NA	NA	NA	NA	NA	NA	NA	NA	NA	NA	NA	NA	NA	NA	NA	NA	NA	NA	NA	NA	NA	NA	NA	NA	NA	NA	NA	NA	NA	NA	NA	NA	NA	NA	NA	avoided	0	0	0	0	0
NA	2015_18_02	2015_18_02_4_1	NA	NA	NA	NA	NA	NA	NA	NA	NA	NA	NA	NA	NA	NA	NA	NA	NA	NA	NA	NA	NA	NA	NA	NA	NA	NA	NA	NA	NA	NA	NA	NA	NA	NA	NA	NA	NA	NA	NA	NA	NA	grazed	0	0	0	0	0
NA	2015_18_02	2015_18_02_4_2	NA	NA	NA	NA	NA	NA	NA	NA	NA	NA	NA	NA	NA	NA	NA	NA	NA	NA	NA	NA	NA	NA	NA	NA	NA	NA	NA	NA	NA	NA	NA	NA	NA	NA	NA	NA	NA	NA	NA	NA	NA	avoided	0	0	0	0	0
NA	2015_18_03	2015_18_03_1_1	NA	NA	NA	NA	NA	NA	NA	NA	NA	NA	NA	NA	NA	NA	NA	NA	NA	NA	NA	NA	NA	NA	NA	NA	NA	NA	NA	NA	NA	NA	NA	NA	NA	NA	NA	NA	NA	NA	NA	NA	NA	grazed	0	0	0	0	0
NA	2015_18_03	2015_18_03_1_2	NA	NA	NA	NA	NA	NA	NA	NA	NA	NA	NA	NA	NA	NA	NA	NA	NA	NA	NA	NA	NA	NA	NA	NA	NA	NA	NA	NA	NA	NA	NA	NA	NA	NA	NA	NA	NA	NA	NA	NA	NA	avoided	0	0	0	0	0
NA	2015_18_03	2015_18_03_2_1	NA	NA	NA	NA	NA	NA	NA	NA	NA	NA	NA	NA	NA	NA	NA	NA	NA	NA	NA	NA	NA	NA	NA	NA	NA	NA	NA	NA	NA	NA	NA	NA	NA	NA	NA	NA	NA	NA	NA	NA	NA	grazed	0	0	0	0	0
NA	2015_18_03	2015_18_03_2_2	NA	NA	NA	NA	NA	NA	NA	NA	NA	NA	NA	NA	NA	NA	NA	NA	NA	NA	NA	NA	NA	NA	NA	NA	NA	NA	NA	NA	NA	NA	NA	NA	NA	NA	NA	NA	NA	NA	NA	NA	NA	avoided	0	0	0	0	0
NA	2015_18_03	2015_18_03_3_1	NA	NA	NA	NA	NA	NA	NA	NA	NA	NA	NA	NA	NA	NA	NA	NA	NA	NA	NA	NA	NA	NA	NA	NA	NA	NA	NA	NA	NA	NA	NA	NA	NA	NA	NA	NA	NA	NA	NA	NA	NA	grazed	0	0	0	0	0
NA	2015_18_03	2015_18_03_3_2	NA	NA	NA	NA	NA	NA	NA	NA	NA	NA	NA	NA	NA	NA	NA	NA	NA	NA	NA	NA	NA	NA	NA	NA	NA	NA	NA	NA	NA	NA	NA	NA	NA	NA	NA	NA	NA	NA	NA	NA	NA	avoided	0	0	0	0	0
NA	2015_18_03	2015_18_03_4_1	NA	NA	NA	NA	NA	NA	NA	NA	NA	NA	NA	NA	NA	NA	NA	NA	NA	NA	NA	NA	NA	NA	NA	NA	NA	NA	NA	NA	NA	NA	NA	NA	NA	NA	NA	NA	NA	NA	NA	NA	NA	grazed	0	0	0	0	0
NA	2015_18_03	2015_18_03_4_2	NA	NA	NA	NA	NA	NA	NA	NA	NA	NA	NA	NA	NA	NA	NA	NA	NA	NA	NA	NA	NA	NA	NA	NA	NA	NA	NA	NA	NA	NA	NA	NA	NA	NA	NA	NA	NA	NA	NA	NA	NA	avoided	0	0	0	0	0
NA	2015_18_04	2015_18_04_1_1	NA	NA	NA	NA	NA	NA	NA	NA	NA	NA	NA	NA	NA	NA	NA	NA	NA	NA	NA	NA	NA	NA	NA	NA	NA	NA	NA	NA	NA	NA	NA	NA	NA	NA	NA	NA	NA	NA	NA	NA	NA	grazed	0	0	0	0	0
NA	2015_18_04	2015_18_04_1_2	NA	NA	NA	NA	NA	NA	NA	NA	NA	NA	NA	NA	NA	NA	NA	NA	NA	NA	NA	NA	NA	NA	NA	NA	NA	NA	NA	NA	NA	NA	NA	NA	NA	NA	NA	NA	NA	NA	NA	NA	NA	avoided	0	0	0	0	0
NA	2015_18_04	2015_18_04_2_1	NA	NA	NA	NA	NA	NA	NA	NA	NA	NA	NA	NA	NA	NA	NA	NA	NA	NA	NA	NA	NA	NA	NA	NA	NA	NA	NA	NA	NA	NA	NA	NA	NA	NA	NA	NA	NA	NA	NA	NA	NA	grazed	0	0	0	0	0
NA	2015_18_04	2015_18_04_2_2	NA	NA	NA	NA	NA	NA	NA	NA	NA	NA	NA	NA	NA	NA	NA	NA	NA	NA	NA	NA	NA	NA	NA	NA	NA	NA	NA	NA	NA	NA	NA	NA	NA	NA	NA	NA	NA	NA	NA	NA	NA	avoided	0	0	0	0	0
NA	2015_18_04	2015_18_04_3_1	NA	NA	NA	NA	NA	NA	NA	NA	NA	NA	NA	NA	NA	NA	NA	NA	NA	NA	NA	NA	NA	NA	NA	NA	NA	NA	NA	NA	NA	NA	NA	NA	NA	NA	NA	NA	NA	NA	NA	NA	NA	grazed	0	0	0	0	0
NA	2015_18_04	2015_18_04_3_2	NA	NA	NA	NA	NA	NA	NA	NA	NA	NA	NA	NA	NA	NA	NA	NA	NA	NA	NA	NA	NA	NA	NA	NA	NA	NA	NA	NA	NA	NA	NA	NA	NA	NA	NA	NA	NA	NA	NA	NA	NA	avoided	0	0	0	0	0
NA	2015_18_04	2015_18_04_4_1	NA	NA	NA	NA	NA	NA	NA	NA	NA	NA	NA	NA	NA	NA	NA	NA	NA	NA	NA	NA	NA	NA	NA	NA	NA	NA	NA	NA	NA	NA	NA	NA	NA	NA	NA	NA	NA	NA	NA	NA	NA	grazed	0	0	0	0	0
NA	2015_18_04	2015_18_04_4_2	NA	NA	NA	NA	NA	NA	NA	NA	NA	NA	NA	NA	NA	NA	NA	NA	NA	NA	NA	NA	NA	NA	NA	NA	NA	NA	NA	NA	NA	NA	NA	NA	NA	NA	NA	NA	NA	NA	NA	NA	NA	avoided	0	0	0	0	0
2015_19	2015_19_01	2015_19_01_1_1	FE	F	E	135	15	8	15	0.111111111	0.111111111	2	0	0	0	1	0	1	0	0	0	1	0	10.75	0	10.75	9	0	9	12	1	13	8	3	1	4	5	4	1	0.5	4	2	3	grazed	0	0	0	0	0
2015_19	2015_19_01	2015_19_01_1_2	FE	F	E	135	15	8	15	0.111111111	0.111111111	2	0	0	0	1	0	1	0	0	0	1	0	10.75	0	10.75	9	0	9	12	1	13	8	3	1	4	5	4	1	0.5	4	2	3	avoided	0	0	0	0	0
2015_19	2015_19_01	2015_19_01_2_1	FE	F	E	135	15	8	15	0.111111111	0.111111111	2	0	0	0	1	0	1	0	0	0	1	0	10.75	0	10.75	9	0	9	12	1	13	8	3	1	4	5	4	1	0.5	4	2	3	grazed	1	0	0	0	0
2015_19	2015_19_01	2015_19_01_2_2	FE	F	E	135	15	8	15	0.111111111	0.111111111	2	0	0	0	1	0	1	0	0	0	1	0	10.75	0	10.75	9	0	9	12	1	13	8	3	1	4	5	4	1	0.5	4	2	3	avoided	1	0	0	0	0
2015_19	2015_19_01	2015_19_01_3_1	FE	F	E	135	15	8	15	0.111111111	0.111111111	2	0	0	0	1	0	1	0	0	0	1	0	10.75	0	10.75	9	0	9	12	1	13	8	3	1	4	5	4	1	0.5	4	2	3	grazed	0	0	0	0	0
2015_19	2015_19_01	2015_19_01_3_2	FE	F	E	135	15	8	15	0.111111111	0.111111111	2	0	0	0	1	0	1	0	0	0	1	0	10.75	0	10.75	9	0	9	12	1	13	8	3	1	4	5	4	1	0.5	4	2	3	avoided	0	0	0	0	0
2015_19	2015_19_01	2015_19_01_4_1	FE	F	E	135	15	8	15	0.111111111	0.111111111	2	0	0	0	1	0	1	0	0	0	1	0	10.75	0	10.75	9	0	9	12	1	13	8	3	1	4	5	4	1	0.5	4	2	3	grazed	1	0	0	0	0
2015_19	2015_19_01	2015_19_01_4_2	FE	F	E	135	15	8	15	0.111111111	0.111111111	2	0	0	0	1	0	1	0	0	0	1	0	10.75	0	10.75	9	0	9	12	1	13	8	3	1	4	5	4	1	0.5	4	2	3	avoided	0	0	0	0	0
2015_19	2015_19_02	2015_19_02_1_1	FE	F	E	135	15	8	15	0.111111111	0.111111111	2	0	0	0	1	1	1	0	0	0	1	1	13.75	0	13.75	7	0	7	12	1	13	8	3	1	4	5	3	2	0.6	1	3	3	grazed	1	0	0	0	0
2015_19	2015_19_02	2015_19_02_1_2	FE	F	E	135	15	8	15	0.111111111	0.111111111	2	0	0	0	1	1	1	0	0	0	1	1	13.75	0	13.75	7	0	7	12	1	13	8	3	1	4	5	3	2	0.6	1	3	3	avoided	0	0	0	0	0
2015_19	2015_19_02	2015_19_02_2_1	FE	F	E	135	15	8	15	0.111111111	0.111111111	2	0	0	0	1	1	1	0	0	0	1	1	13.75	0	13.75	7	0	7	12	1	13	8	3	1	4	5	3	2	0.6	1	3	3	grazed	1	0	0	0	0
2015_19	2015_19_02	2015_19_02_2_2	FE	F	E	135	15	8	15	0.111111111	0.111111111	2	0	0	0	1	1	1	0	0	0	1	1	13.75	0	13.75	7	0	7	12	1	13	8	3	1	4	5	3	2	0.6	1	3	3	avoided	0	0	0	0	0
2015_19	2015_19_02	2015_19_02_3_1	FE	F	E	135	15	8	15	0.111111111	0.111111111	2	0	0	0	1	1	1	0	0	0	1	1	13.75	0	13.75	7	0	7	12	1	13	8	3	1	4	5	3	2	0.6	1	3	3	grazed	1	0	0	0	0
2015_19	2015_19_02	2015_19_02_3_2	FE	F	E	135	15	8	15	0.111111111	0.111111111	2	0	0	0	1	1	1	0	0	0	1	1	13.75	0	13.75	7	0	7	12	1	13	8	3	1	4	5	3	2	0.6	1	3	3	avoided	0	0	0	0	0
2015_19	2015_19_02	2015_19_02_4_1	FE	F	E	135	15	8	15	0.111111111	0.111111111	2	0	0	0	1	1	1	0	0	0	1	1	13.75	0	13.75	7	0	7	12	1	13	8	3	1	4	5	3	2	0.6	1	3	3	grazed	1	0	0	0	0
2015_19	2015_19_02	2015_19_02_4_2	FE	F	E	135	15	8	15	0.111111111	0.111111111	2	0	0	0	1	1	1	0	0	0	1	1	13.75	0	13.75	7	0	7	12	1	13	8	3	1	4	5	3	2	0.6	1	3	3	avoided	0	0	0	0	0
NA	2015_19_03	2015_19_03_1_1	NA	NA	NA	NA	NA	NA	NA	NA	NA	NA	NA	NA	NA	NA	NA	NA	NA	NA	NA	NA	NA	NA	NA	NA	NA	NA	NA	NA	NA	NA	NA	NA	NA	NA	NA	NA	NA	NA	NA	NA	NA	grazed	0	0	0	0	0
NA	2015_19_03	2015_19_03_1_2	NA	NA	NA	NA	NA	NA	NA	NA	NA	NA	NA	NA	NA	NA	NA	NA	NA	NA	NA	NA	NA	NA	NA	NA	NA	NA	NA	NA	NA	NA	NA	NA	NA	NA	NA	NA	NA	NA	NA	NA	NA	avoided	0	0	0	0	0
NA	2015_19_03	2015_19_03_2_1	NA	NA	NA	NA	NA	NA	NA	NA	NA	NA	NA	NA	NA	NA	NA	NA	NA	NA	NA	NA	NA	NA	NA	NA	NA	NA	NA	NA	NA	NA	NA	NA	NA	NA	NA	NA	NA	NA	NA	NA	NA	grazed	0	0	0	0	0
NA	2015_19_03	2015_19_03_2_2	NA	NA	NA	NA	NA	NA	NA	NA	NA	NA	NA	NA	NA	NA	NA	NA	NA	NA	NA	NA	NA	NA	NA	NA	NA	NA	NA	NA	NA	NA	NA	NA	NA	NA	NA	NA	NA	NA	NA	NA	NA	avoided	0	0	0	0	0
NA	2015_19_03	2015_19_03_3_1	NA	NA	NA	NA	NA	NA	NA	NA	NA	NA	NA	NA	NA	NA	NA	NA	NA	NA	NA	NA	NA	NA	NA	NA	NA	NA	NA	NA	NA	NA	NA	NA	NA	NA	NA	NA	NA	NA	NA	NA	NA	grazed	0	0	0	0	0
NA	2015_19_03	2015_19_03_3_2	NA	NA	NA	NA	NA	NA	NA	NA	NA	NA	NA	NA	NA	NA	NA	NA	NA	NA	NA	NA	NA	NA	NA	NA	NA	NA	NA	NA	NA	NA	NA	NA	NA	NA	NA	NA	NA	NA	NA	NA	NA	avoided	0	0	0	0	0
NA	2015_19_03	2015_19_03_4_1	NA	NA	NA	NA	NA	NA	NA	NA	NA	NA	NA	NA	NA	NA	NA	NA	NA	NA	NA	NA	NA	NA	NA	NA	NA	NA	NA	NA	NA	NA	NA	NA	NA	NA	NA	NA	NA	NA	NA	NA	NA	grazed	0	0	0	0	0
NA	2015_19_03	2015_19_03_4_2	NA	NA	NA	NA	NA	NA	NA	NA	NA	NA	NA	NA	NA	NA	NA	NA	NA	NA	NA	NA	NA	NA	NA	NA	NA	NA	NA	NA	NA	NA	NA	NA	NA	NA	NA	NA	NA	NA	NA	NA	NA	avoided	0	0	0	0	0
NA	2015_19_04	2015_19_04_1_1	NA	NA	NA	NA	NA	NA	NA	NA	NA	NA	NA	NA	NA	NA	NA	NA	NA	NA	NA	NA	NA	NA	NA	NA	NA	NA	NA	NA	NA	NA	NA	NA	NA	NA	NA	NA	NA	NA	NA	NA	NA	grazed	0	0	0	0	0
NA	2015_19_04	2015_19_04_1_2	NA	NA	NA	NA	NA	NA	NA	NA	NA	NA	NA	NA	NA	NA	NA	NA	NA	NA	NA	NA	NA	NA	NA	NA	NA	NA	NA	NA	NA	NA	NA	NA	NA	NA	NA	NA	NA	NA	NA	NA	NA	avoided	1	0	0	0	0
NA	2015_19_04	2015_19_04_2_1	NA	NA	NA	NA	NA	NA	NA	NA	NA	NA	NA	NA	NA	NA	NA	NA	NA	NA	NA	NA	NA	NA	NA	NA	NA	NA	NA	NA	NA	NA	NA	NA	NA	NA	NA	NA	NA	NA	NA	NA	NA	grazed	0	0	0	0	0
NA	2015_19_04	2015_19_04_2_2	NA	NA	NA	NA	NA	NA	NA	NA	NA	NA	NA	NA	NA	NA	NA	NA	NA	NA	NA	NA	NA	NA	NA	NA	NA	NA	NA	NA	NA	NA	NA	NA	NA	NA	NA	NA	NA	NA	NA	NA	NA	avoided	1	0	0	0	0
NA	2015_19_04	2015_19_04_3_1	NA	NA	NA	NA	NA	NA	NA	NA	NA	NA	NA	NA	NA	NA	NA	NA	NA	NA	NA	NA	NA	NA	NA	NA	NA	NA	NA	NA	NA	NA	NA	NA	NA	NA	NA	NA	NA	NA	NA	NA	NA	grazed	1	0	0	0	0
NA	2015_19_04	2015_19_04_3_2	NA	NA	NA	NA	NA	NA	NA	NA	NA	NA	NA	NA	NA	NA	NA	NA	NA	NA	NA	NA	NA	NA	NA	NA	NA	NA	NA	NA	NA	NA	NA	NA	NA	NA	NA	NA	NA	NA	NA	NA	NA	avoided	0	0	0	0	0
NA	2015_19_04	2015_19_04_4_1	NA	NA	NA	NA	NA	NA	NA	NA	NA	NA	NA	NA	NA	NA	NA	NA	NA	NA	NA	NA	NA	NA	NA	NA	NA	NA	NA	NA	NA	NA	NA	NA	NA	NA	NA	NA	NA	NA	NA	NA	NA	grazed	1	0	0	0	0
NA	2015_19_04	2015_19_04_4_2	NA	NA	NA	NA	NA	NA	NA	NA	NA	NA	NA	NA	NA	NA	NA	NA	NA	NA	NA	NA	NA	NA	NA	NA	NA	NA	NA	NA	NA	NA	NA	NA	NA	NA	NA	NA	NA	NA	NA	NA	NA	avoided	0	0	0	0	0
NA	2015_20_01	2015_20_01_1_1	NA	NA	NA	NA	NA	NA	NA	NA	NA	NA	NA	NA	NA	NA	NA	NA	NA	NA	NA	NA	NA	NA	NA	NA	NA	NA	NA	NA	NA	NA	NA	NA	NA	NA	NA	NA	NA	NA	NA	NA	NA	grazed	0	0	0	0	0
NA	2015_20_01	2015_20_01_1_2	NA	NA	NA	NA	NA	NA	NA	NA	NA	NA	NA	NA	NA	NA	NA	NA	NA	NA	NA	NA	NA	NA	NA	NA	NA	NA	NA	NA	NA	NA	NA	NA	NA	NA	NA	NA	NA	NA	NA	NA	NA	avoided	1	0	0	0	0
NA	2015_20_01	2015_20_01_2_1	NA	NA	NA	NA	NA	NA	NA	NA	NA	NA	NA	NA	NA	NA	NA	NA	NA	NA	NA	NA	NA	NA	NA	NA	NA	NA	NA	NA	NA	NA	NA	NA	NA	NA	NA	NA	NA	NA	NA	NA	NA	grazed	0	0	0	0	0
NA	2015_20_01	2015_20_01_2_2	NA	NA	NA	NA	NA	NA	NA	NA	NA	NA	NA	NA	NA	NA	NA	NA	NA	NA	NA	NA	NA	NA	NA	NA	NA	NA	NA	NA	NA	NA	NA	NA	NA	NA	NA	NA	NA	NA	NA	NA	NA	avoided	0	0	0	0	0
NA	2015_20_01	2015_20_01_3_1	NA	NA	NA	NA	NA	NA	NA	NA	NA	NA	NA	NA	NA	NA	NA	NA	NA	NA	NA	NA	NA	NA	NA	NA	NA	NA	NA	NA	NA	NA	NA	NA	NA	NA	NA	NA	NA	NA	NA	NA	NA	grazed	0	0	0	0	0
NA	2015_20_01	2015_20_01_3_2	NA	NA	NA	NA	NA	NA	NA	NA	NA	NA	NA	NA	NA	NA	NA	NA	NA	NA	NA	NA	NA	NA	NA	NA	NA	NA	NA	NA	NA	NA	NA	NA	NA	NA	NA	NA	NA	NA	NA	NA	NA	avoided	0	0	0	0	0
NA	2015_20_01	2015_20_01_4_1	NA	NA	NA	NA	NA	NA	NA	NA	NA	NA	NA	NA	NA	NA	NA	NA	NA	NA	NA	NA	NA	NA	NA	NA	NA	NA	NA	NA	NA	NA	NA	NA	NA	NA	NA	NA	NA	NA	NA	NA	NA	grazed	0	0	0	0	0
NA	2015_20_01	2015_20_01_4_2	NA	NA	NA	NA	NA	NA	NA	NA	NA	NA	NA	NA	NA	NA	NA	NA	NA	NA	NA	NA	NA	NA	NA	NA	NA	NA	NA	NA	NA	NA	NA	NA	NA	NA	NA	NA	NA	NA	NA	NA	NA	avoided	0	0	0	0	0
2015_20	2015_20_02	2015_20_02_1_1	FE	F	E	100.3	89.81	36.57	40	0.895413759	0.398803589	1.7	0	1	0	1	0	1	0	0	0	1	0	27.875	7.875	35.75	9	1	10	13	2	15	7.5	0	1	1	6	4	2	0.571428571	3	3	4	grazed	0	0	0	0	0
2015_20	2015_20_02	2015_20_02_1_2	FE	F	E	100.3	89.81	36.57	40	0.895413759	0.398803589	1.7	0	1	0	1	0	1	0	0	0	1	0	27.875	7.875	35.75	9	1	10	13	2	15	7.5	0	1	1	6	4	2	0.571428571	3	3	4	avoided	0	0	0	0	0
2015_20	2015_20_02	2015_20_02_2_1	FE	F	E	100.3	89.81	36.57	40	0.895413759	0.398803589	1.7	0	1	0	1	0	1	0	0	0	1	0	27.875	7.875	35.75	9	1	10	13	2	15	7.5	0	1	1	6	4	2	0.571428571	3	3	4	grazed	0	0	0	0	0
2015_20	2015_20_02	2015_20_02_2_2	FE	F	E	100.3	89.81	36.57	40	0.895413759	0.398803589	1.7	0	1	0	1	0	1	0	0	0	1	0	27.875	7.875	35.75	9	1	10	13	2	15	7.5	0	1	1	6	4	2	0.571428571	3	3	4	avoided	0	0	0	0	0
2015_20	2015_20_02	2015_20_02_3_1	FE	F	E	100.3	89.81	36.57	40	0.895413759	0.398803589	1.7	0	1	0	1	0	1	0	0	0	1	0	27.875	7.875	35.75	9	1	10	13	2	15	7.5	0	1	1	6	4	2	0.571428571	3	3	4	grazed	0	0	0	0	0
2015_20	2015_20_02	2015_20_02_3_2	FE	F	E	100.3	89.81	36.57	40	0.895413759	0.398803589	1.7	0	1	0	1	0	1	0	0	0	1	0	27.875	7.875	35.75	9	1	10	13	2	15	7.5	0	1	1	6	4	2	0.571428571	3	3	4	avoided	0	0	0	0	0
2015_20	2015_20_02	2015_20_02_4_1	FE	F	E	100.3	89.81	36.57	40	0.895413759	0.398803589	1.7	0	1	0	1	0	1	0	0	0	1	0	27.875	7.875	35.75	9	1	10	13	2	15	7.5	0	1	1	6	4	2	0.571428571	3	3	4	grazed	0	0	0	0	0
2015_20	2015_20_02	2015_20_02_4_2	FE	F	E	100.3	89.81	36.57	40	0.895413759	0.398803589	1.7	0	1	0	1	0	1	0	0	0	1	0	27.875	7.875	35.75	9	1	10	13	2	15	7.5	0	1	1	6	4	2	0.571428571	3	3	4	avoided	0	0	0	0	0
2015_20	2015_20_03	2015_20_03_1_1	FE	F	E	100.3	89.81	36.57	40	0.895413759	0.398803589	1.7	0	1	0	1	0	0	0	0	0	1	1	17.625	4.875	22.5	6	2	8	13	2	15	7.5	1	0	1	6	3	3	0.545454545	1	4	3	grazed	0	0	0	0	0
2015_20	2015_20_03	2015_20_03_1_2	FE	F	E	100.3	89.81	36.57	40	0.895413759	0.398803589	1.7	0	1	0	1	0	0	0	0	0	1	1	17.625	4.875	22.5	6	2	8	13	2	15	7.5	1	0	1	6	3	3	0.545454545	1	4	3	avoided	0	0	0	0	0
2015_20	2015_20_03	2015_20_03_2_1	FE	F	E	100.3	89.81	36.57	40	0.895413759	0.398803589	1.7	0	1	0	1	0	0	0	0	0	1	1	17.625	4.875	22.5	6	2	8	13	2	15	7.5	1	0	1	6	3	3	0.545454545	1	4	3	grazed	0	0	0	0	0
2015_20	2015_20_03	2015_20_03_2_2	FE	F	E	100.3	89.81	36.57	40	0.895413759	0.398803589	1.7	0	1	0	1	0	0	0	0	0	1	1	17.625	4.875	22.5	6	2	8	13	2	15	7.5	1	0	1	6	3	3	0.545454545	1	4	3	avoided	0	0	0	0	0
2015_20	2015_20_03	2015_20_03_3_1	FE	F	E	100.3	89.81	36.57	40	0.895413759	0.398803589	1.7	0	1	0	1	0	0	0	0	0	1	1	17.625	4.875	22.5	6	2	8	13	2	15	7.5	1	0	1	6	3	3	0.545454545	1	4	3	grazed	0	0	0	0	0
2015_20	2015_20_03	2015_20_03_3_2	FE	F	E	100.3	89.81	36.57	40	0.895413759	0.398803589	1.7	0	1	0	1	0	0	0	0	0	1	1	17.625	4.875	22.5	6	2	8	13	2	15	7.5	1	0	1	6	3	3	0.545454545	1	4	3	avoided	0	0	0	0	0
2015_20	2015_20_03	2015_20_03_4_1	FE	F	E	100.3	89.81	36.57	40	0.895413759	0.398803589	1.7	0	1	0	1	0	0	0	0	0	1	1	17.625	4.875	22.5	6	2	8	13	2	15	7.5	1	0	1	6	3	3	0.545454545	1	4	3	grazed	0	0	0	0	0
2015_20	2015_20_03	2015_20_03_4_2	FE	F	E	100.3	89.81	36.57	40	0.895413759	0.398803589	1.7	0	1	0	1	0	0	0	0	0	1	1	17.625	4.875	22.5	6	2	8	13	2	15	7.5	1	0	1	6	3	3	0.545454545	1	4	3	avoided	0	0	0	0	0
2015_20	2015_20_04	2015_20_04_1_1	FE	F	E	100.3	89.81	36.57	40	0.895413759	0.398803589	1.7	0	1	0	1	0	0	0	0	0	1	1	16.375	1.5	17.875	4	1	5	13	2	15	7.5	0	1	1	6	0	6	0.571428571	1	2	2	grazed	1	0	0	0	0
2015_20	2015_20_04	2015_20_04_1_2	FE	F	E	100.3	89.81	36.57	40	0.895413759	0.398803589	1.7	0	1	0	1	0	0	0	0	0	1	1	16.375	1.5	17.875	4	1	5	13	2	15	7.5	0	1	1	6	0	6	0.571428571	1	2	2	avoided	0	0	0	0	0
2015_20	2015_20_04	2015_20_04_2_1	FE	F	E	100.3	89.81	36.57	40	0.895413759	0.398803589	1.7	0	1	0	1	0	0	0	0	0	1	1	16.375	1.5	17.875	4	1	5	13	2	15	7.5	0	1	1	6	0	6	0.571428571	1	2	2	grazed	0	0	0	0	0
2015_20	2015_20_04	2015_20_04_2_2	FE	F	E	100.3	89.81	36.57	40	0.895413759	0.398803589	1.7	0	1	0	1	0	0	0	0	0	1	1	16.375	1.5	17.875	4	1	5	13	2	15	7.5	0	1	1	6	0	6	0.571428571	1	2	2	avoided	0	0	0	0	0
2015_20	2015_20_04	2015_20_04_3_1	FE	F	E	100.3	89.81	36.57	40	0.895413759	0.398803589	1.7	0	1	0	1	0	0	0	0	0	1	1	16.375	1.5	17.875	4	1	5	13	2	15	7.5	0	1	1	6	0	6	0.571428571	1	2	2	grazed	0	0	0	0	0
2015_20	2015_20_04	2015_20_04_3_2	FE	F	E	100.3	89.81	36.57	40	0.895413759	0.398803589	1.7	0	1	0	1	0	0	0	0	0	1	1	16.375	1.5	17.875	4	1	5	13	2	15	7.5	0	1	1	6	0	6	0.571428571	1	2	2	avoided	0	0	0	0	0
2015_20	2015_20_04	2015_20_04_4_1	FE	F	E	100.3	89.81	36.57	40	0.895413759	0.398803589	1.7	0	1	0	1	0	0	0	0	0	1	1	16.375	1.5	17.875	4	1	5	13	2	15	7.5	0	1	1	6	0	6	0.571428571	1	2	2	grazed	0	0	0	0	0
2015_20	2015_20_04	2015_20_04_4_2	FE	F	E	100.3	89.81	36.57	40	0.895413759	0.398803589	1.7	0	1	0	1	0	0	0	0	0	1	1	16.375	1.5	17.875	4	1	5	13	2	15	7.5	0	1	1	6	0	6	0.571428571	1	2	2	avoided	0	0	0	0	0
2015_21	2015_21_01	2015_21_01_1_1	FWE	F	WE	9.75	9.75	23	9.75	1	1	2	0	0	1	0	0	1	1	0	0	1	0	35	7.5	42.5	10	1	11	10	1	11	4.25	2	0	2	3	3	0	0.705882353	3	2	6	grazed	1	0	0	0	0
2015_21	2015_21_01	2015_21_01_1_2	FWE	F	WE	9.75	9.75	23	9.75	1	1	2	0	0	1	0	0	1	1	0	0	1	0	35	7.5	42.5	10	1	11	10	1	11	4.25	2	0	2	3	3	0	0.705882353	3	2	6	avoided	1	0	0	0	0
2015_21	2015_21_01	2015_21_01_2_1	FWE	F	WE	9.75	9.75	23	9.75	1	1	2	0	0	1	0	0	1	1	0	0	1	0	35	7.5	42.5	10	1	11	10	1	11	4.25	2	0	2	3	3	0	0.705882353	3	2	6	grazed	0	0	0	0	0
2015_21	2015_21_01	2015_21_01_2_2	FWE	F	WE	9.75	9.75	23	9.75	1	1	2	0	0	1	0	0	1	1	0	0	1	0	35	7.5	42.5	10	1	11	10	1	11	4.25	2	0	2	3	3	0	0.705882353	3	2	6	avoided	0	0	0	0	0
2015_21	2015_21_01	2015_21_01_3_1	FWE	F	WE	9.75	9.75	23	9.75	1	1	2	0	0	1	0	0	1	1	0	0	1	0	35	7.5	42.5	10	1	11	10	1	11	4.25	2	0	2	3	3	0	0.705882353	3	2	6	grazed	0	0	0	0	0
2015_21	2015_21_01	2015_21_01_3_2	FWE	F	WE	9.75	9.75	23	9.75	1	1	2	0	0	1	0	0	1	1	0	0	1	0	35	7.5	42.5	10	1	11	10	1	11	4.25	2	0	2	3	3	0	0.705882353	3	2	6	avoided	0	0	0	0	0
2015_21	2015_21_01	2015_21_01_4_1	FWE	F	WE	9.75	9.75	23	9.75	1	1	2	0	0	1	0	0	1	1	0	0	1	0	35	7.5	42.5	10	1	11	10	1	11	4.25	2	0	2	3	3	0	0.705882353	3	2	6	grazed	0	0	0	0	0
2015_21	2015_21_01	2015_21_01_4_2	FWE	F	WE	9.75	9.75	23	9.75	1	1	2	0	0	1	0	0	1	1	0	0	1	0	35	7.5	42.5	10	1	11	10	1	11	4.25	2	0	2	3	3	0	0.705882353	3	2	6	avoided	0	0	0	0	0
2015_21	2015_21_02	2015_21_02_1_1	FWE	F	WE	9.75	9.75	23	9.75	1	1	2	0	0	1	0	0	1	1	0	0	1	0	35	10	45	8	1	9	10	1	11	4.25	1	1	2	3	3	0	0.714285714	2	2	5	grazed	0	0	0	0	0
2015_21	2015_21_02	2015_21_02_1_2	FWE	F	WE	9.75	9.75	23	9.75	1	1	2	0	0	1	0	0	1	1	0	0	1	0	35	10	45	8	1	9	10	1	11	4.25	1	1	2	3	3	0	0.714285714	2	2	5	avoided	1	0	0	0	0
2015_21	2015_21_02	2015_21_02_2_1	FWE	F	WE	9.75	9.75	23	9.75	1	1	2	0	0	1	0	0	1	1	0	0	1	0	35	10	45	8	1	9	10	1	11	4.25	1	1	2	3	3	0	0.714285714	2	2	5	grazed	0	0	0	0	0
2015_21	2015_21_02	2015_21_02_2_2	FWE	F	WE	9.75	9.75	23	9.75	1	1	2	0	0	1	0	0	1	1	0	0	1	0	35	10	45	8	1	9	10	1	11	4.25	1	1	2	3	3	0	0.714285714	2	2	5	avoided	0	0	0	0	0
2015_21	2015_21_02	2015_21_02_3_1	FWE	F	WE	9.75	9.75	23	9.75	1	1	2	0	0	1	0	0	1	1	0	0	1	0	35	10	45	8	1	9	10	1	11	4.25	1	1	2	3	3	0	0.714285714	2	2	5	grazed	0	0	0	0	0
2015_21	2015_21_02	2015_21_02_3_2	FWE	F	WE	9.75	9.75	23	9.75	1	1	2	0	0	1	0	0	1	1	0	0	1	0	35	10	45	8	1	9	10	1	11	4.25	1	1	2	3	3	0	0.714285714	2	2	5	avoided	0	0	0	0	0
2015_21	2015_21_02	2015_21_02_4_1	FWE	F	WE	9.75	9.75	23	9.75	1	1	2	0	0	1	0	0	1	1	0	0	1	0	35	10	45	8	1	9	10	1	11	4.25	1	1	2	3	3	0	0.714285714	2	2	5	grazed	0	0	0	0	0
2015_21	2015_21_02	2015_21_02_4_2	FWE	F	WE	9.75	9.75	23	9.75	1	1	2	0	0	1	0	0	1	1	0	0	1	0	35	10	45	8	1	9	10	1	11	4.25	1	1	2	3	3	0	0.714285714	2	2	5	avoided	0	0	0	0	0
2015_21	2015_21_03	2015_21_03_1_1	FWE	F	WE	9.75	9.75	23	9.75	1	1	2	0	0	1	0	0	1	1	0	0	1	1	15	5	20	4	1	5	10	1	11	4.25	1	1	2	3	2	1	0.75	1	1	3	grazed	0	0	0	0	0
2015_21	2015_21_03	2015_21_03_1_2	FWE	F	WE	9.75	9.75	23	9.75	1	1	2	0	0	1	0	0	1	1	0	0	1	1	15	5	20	4	1	5	10	1	11	4.25	1	1	2	3	2	1	0.75	1	1	3	avoided	0	0	0	0	0
2015_21	2015_21_03	2015_21_03_2_1	FWE	F	WE	9.75	9.75	23	9.75	1	1	2	0	0	1	0	0	1	1	0	0	1	1	15	5	20	4	1	5	10	1	11	4.25	1	1	2	3	2	1	0.75	1	1	3	grazed	0	0	0	0	0
2015_21	2015_21_03	2015_21_03_2_2	FWE	F	WE	9.75	9.75	23	9.75	1	1	2	0	0	1	0	0	1	1	0	0	1	1	15	5	20	4	1	5	10	1	11	4.25	1	1	2	3	2	1	0.75	1	1	3	avoided	0	0	0	0	0
2015_21	2015_21_03	2015_21_03_3_1	FWE	F	WE	9.75	9.75	23	9.75	1	1	2	0	0	1	0	0	1	1	0	0	1	1	15	5	20	4	1	5	10	1	11	4.25	1	1	2	3	2	1	0.75	1	1	3	grazed	0	0	0	0	0
2015_21	2015_21_03	2015_21_03_3_2	FWE	F	WE	9.75	9.75	23	9.75	1	1	2	0	0	1	0	0	1	1	0	0	1	1	15	5	20	4	1	5	10	1	11	4.25	1	1	2	3	2	1	0.75	1	1	3	avoided	0	0	0	0	0
2015_21	2015_21_03	2015_21_03_4_1	FWE	F	WE	9.75	9.75	23	9.75	1	1	2	0	0	1	0	0	1	1	0	0	1	1	15	5	20	4	1	5	10	1	11	4.25	1	1	2	3	2	1	0.75	1	1	3	grazed	0	0	0	0	0
2015_21	2015_21_03	2015_21_03_4_2	FWE	F	WE	9.75	9.75	23	9.75	1	1	2	0	0	1	0	0	1	1	0	0	1	1	15	5	20	4	1	5	10	1	11	4.25	1	1	2	3	2	1	0.75	1	1	3	avoided	0	0	0	0	0
NA	2015_21_04	2015_21_04_1_1	NA	NA	NA	NA	NA	NA	NA	NA	NA	NA	NA	NA	NA	NA	NA	NA	NA	NA	NA	NA	NA	NA	NA	NA	NA	NA	NA	NA	NA	NA	NA	NA	NA	NA	NA	NA	NA	NA	NA	NA	NA	grazed	0	0	0	0	0
NA	2015_21_04	2015_21_04_1_2	NA	NA	NA	NA	NA	NA	NA	NA	NA	NA	NA	NA	NA	NA	NA	NA	NA	NA	NA	NA	NA	NA	NA	NA	NA	NA	NA	NA	NA	NA	NA	NA	NA	NA	NA	NA	NA	NA	NA	NA	NA	avoided	0	0	0	0	0
NA	2015_21_04	2015_21_04_2_1	NA	NA	NA	NA	NA	NA	NA	NA	NA	NA	NA	NA	NA	NA	NA	NA	NA	NA	NA	NA	NA	NA	NA	NA	NA	NA	NA	NA	NA	NA	NA	NA	NA	NA	NA	NA	NA	NA	NA	NA	NA	grazed	0	0	0	0	0
NA	2015_21_04	2015_21_04_2_2	NA	NA	NA	NA	NA	NA	NA	NA	NA	NA	NA	NA	NA	NA	NA	NA	NA	NA	NA	NA	NA	NA	NA	NA	NA	NA	NA	NA	NA	NA	NA	NA	NA	NA	NA	NA	NA	NA	NA	NA	NA	avoided	0	0	0	0	0
NA	2015_21_04	2015_21_04_3_1	NA	NA	NA	NA	NA	NA	NA	NA	NA	NA	NA	NA	NA	NA	NA	NA	NA	NA	NA	NA	NA	NA	NA	NA	NA	NA	NA	NA	NA	NA	NA	NA	NA	NA	NA	NA	NA	NA	NA	NA	NA	grazed	0	0	0	0	0
NA	2015_21_04	2015_21_04_3_2	NA	NA	NA	NA	NA	NA	NA	NA	NA	NA	NA	NA	NA	NA	NA	NA	NA	NA	NA	NA	NA	NA	NA	NA	NA	NA	NA	NA	NA	NA	NA	NA	NA	NA	NA	NA	NA	NA	NA	NA	NA	avoided	0	0	0	0	0
NA	2015_21_04	2015_21_04_4_1	NA	NA	NA	NA	NA	NA	NA	NA	NA	NA	NA	NA	NA	NA	NA	NA	NA	NA	NA	NA	NA	NA	NA	NA	NA	NA	NA	NA	NA	NA	NA	NA	NA	NA	NA	NA	NA	NA	NA	NA	NA	grazed	0	0	0	0	0
NA	2015_21_04	2015_21_04_4_2	NA	NA	NA	NA	NA	NA	NA	NA	NA	NA	NA	NA	NA	NA	NA	NA	NA	NA	NA	NA	NA	NA	NA	NA	NA	NA	NA	NA	NA	NA	NA	NA	NA	NA	NA	NA	NA	NA	NA	NA	NA	avoided	0	0	0	0	0
2015_22	2015_22_01	2015_22_01_1_1	FE	F	E	70	28	30	28	0.4	0.4	2	0	0	0	0	0	0	0	0	0	0	0	27.5	0.625	28.125	16	1	17	22	4	26	16	3	2	5	7	4	3	0.583333333	5	5	7	grazed	0	0	0	0	0
2015_22	2015_22_01	2015_22_01_1_2	FE	F	E	70	28	30	28	0.4	0.4	2	0	0	0	0	0	0	0	0	0	0	0	27.5	0.625	28.125	16	1	17	22	4	26	16	3	2	5	7	4	3	0.583333333	5	5	7	avoided	0	0	0	0	0
2015_22	2015_22_01	2015_22_01_2_1	FE	F	E	70	28	30	28	0.4	0.4	2	0	0	0	0	0	0	0	0	0	0	0	27.5	0.625	28.125	16	1	17	22	4	26	16	3	2	5	7	4	3	0.583333333	5	5	7	grazed	0	0	0	0	1
2015_22	2015_22_01	2015_22_01_2_2	FE	F	E	70	28	30	28	0.4	0.4	2	0	0	0	0	0	0	0	0	0	0	0	27.5	0.625	28.125	16	1	17	22	4	26	16	3	2	5	7	4	3	0.583333333	5	5	7	avoided	0	0	0	0	0
2015_22	2015_22_01	2015_22_01_3_1	FE	F	E	70	28	30	28	0.4	0.4	2	0	0	0	0	0	0	0	0	0	0	0	27.5	0.625	28.125	16	1	17	22	4	26	16	3	2	5	7	4	3	0.583333333	5	5	7	grazed	0	0	0	0	0
2015_22	2015_22_01	2015_22_01_3_2	FE	F	E	70	28	30	28	0.4	0.4	2	0	0	0	0	0	0	0	0	0	0	0	27.5	0.625	28.125	16	1	17	22	4	26	16	3	2	5	7	4	3	0.583333333	5	5	7	avoided	0	0	0	0	0
2015_22	2015_22_01	2015_22_01_4_1	FE	F	E	70	28	30	28	0.4	0.4	2	0	0	0	0	0	0	0	0	0	0	0	27.5	0.625	28.125	16	1	17	22	4	26	16	3	2	5	7	4	3	0.583333333	5	5	7	grazed	0	0	0	0	0
2015_22	2015_22_01	2015_22_01_4_2	FE	F	E	70	28	30	28	0.4	0.4	2	0	0	0	0	0	0	0	0	0	0	0	27.5	0.625	28.125	16	1	17	22	4	26	16	3	2	5	7	4	3	0.583333333	5	5	7	avoided	0	0	0	0	0
NA	2015_22_02	2015_22_02_1_1	NA	NA	NA	NA	NA	NA	NA	NA	NA	NA	NA	NA	NA	NA	NA	NA	NA	NA	NA	NA	NA	NA	NA	NA	NA	NA	NA	NA	NA	NA	NA	NA	NA	NA	NA	NA	NA	NA	NA	NA	NA	grazed	0	0	0	0	0
NA	2015_22_02	2015_22_02_1_2	NA	NA	NA	NA	NA	NA	NA	NA	NA	NA	NA	NA	NA	NA	NA	NA	NA	NA	NA	NA	NA	NA	NA	NA	NA	NA	NA	NA	NA	NA	NA	NA	NA	NA	NA	NA	NA	NA	NA	NA	NA	avoided	0	0	0	0	0
NA	2015_22_02	2015_22_02_2_1	NA	NA	NA	NA	NA	NA	NA	NA	NA	NA	NA	NA	NA	NA	NA	NA	NA	NA	NA	NA	NA	NA	NA	NA	NA	NA	NA	NA	NA	NA	NA	NA	NA	NA	NA	NA	NA	NA	NA	NA	NA	grazed	0	0	0	0	0
NA	2015_22_02	2015_22_02_2_2	NA	NA	NA	NA	NA	NA	NA	NA	NA	NA	NA	NA	NA	NA	NA	NA	NA	NA	NA	NA	NA	NA	NA	NA	NA	NA	NA	NA	NA	NA	NA	NA	NA	NA	NA	NA	NA	NA	NA	NA	NA	avoided	0	0	0	0	0
NA	2015_22_02	2015_22_02_3_1	NA	NA	NA	NA	NA	NA	NA	NA	NA	NA	NA	NA	NA	NA	NA	NA	NA	NA	NA	NA	NA	NA	NA	NA	NA	NA	NA	NA	NA	NA	NA	NA	NA	NA	NA	NA	NA	NA	NA	NA	NA	grazed	0	0	0	0	0
NA	2015_22_02	2015_22_02_3_2	NA	NA	NA	NA	NA	NA	NA	NA	NA	NA	NA	NA	NA	NA	NA	NA	NA	NA	NA	NA	NA	NA	NA	NA	NA	NA	NA	NA	NA	NA	NA	NA	NA	NA	NA	NA	NA	NA	NA	NA	NA	avoided	0	0	0	0	0
NA	2015_22_02	2015_22_02_4_1	NA	NA	NA	NA	NA	NA	NA	NA	NA	NA	NA	NA	NA	NA	NA	NA	NA	NA	NA	NA	NA	NA	NA	NA	NA	NA	NA	NA	NA	NA	NA	NA	NA	NA	NA	NA	NA	NA	NA	NA	NA	grazed	0	0	0	0	0
NA	2015_22_02	2015_22_02_4_2	NA	NA	NA	NA	NA	NA	NA	NA	NA	NA	NA	NA	NA	NA	NA	NA	NA	NA	NA	NA	NA	NA	NA	NA	NA	NA	NA	NA	NA	NA	NA	NA	NA	NA	NA	NA	NA	NA	NA	NA	NA	avoided	0	0	0	0	0
2015_22	2015_22_03	2015_22_03_1_1	FE	F	E	70	28	30	28	0.4	0.4	2	0	0	1	1	0	1	0	0	1	1	1	3.25	0	3.25	8	1	9	22	4	26	16	2	3	5	7	4	3	0.714285714	2	2	5	grazed	0	0	0	0	0
2015_22	2015_22_03	2015_22_03_1_2	FE	F	E	70	28	30	28	0.4	0.4	2	0	0	1	1	0	1	0	0	1	1	1	3.25	0	3.25	8	1	9	22	4	26	16	2	3	5	7	4	3	0.714285714	2	2	5	avoided	0	0	0	0	0
2015_22	2015_22_03	2015_22_03_2_1	FE	F	E	70	28	30	28	0.4	0.4	2	0	0	1	1	0	1	0	0	1	1	1	3.25	0	3.25	8	1	9	22	4	26	16	2	3	5	7	4	3	0.714285714	2	2	5	grazed	0	0	0	0	0
2015_22	2015_22_03	2015_22_03_2_2	FE	F	E	70	28	30	28	0.4	0.4	2	0	0	1	1	0	1	0	0	1	1	1	3.25	0	3.25	8	1	9	22	4	26	16	2	3	5	7	4	3	0.714285714	2	2	5	avoided	0	0	0	0	0
2015_22	2015_22_03	2015_22_03_3_1	FE	F	E	70	28	30	28	0.4	0.4	2	0	0	1	1	0	1	0	0	1	1	1	3.25	0	3.25	8	1	9	22	4	26	16	2	3	5	7	4	3	0.714285714	2	2	5	grazed	0	0	0	0	0
2015_22	2015_22_03	2015_22_03_3_2	FE	F	E	70	28	30	28	0.4	0.4	2	0	0	1	1	0	1	0	0	1	1	1	3.25	0	3.25	8	1	9	22	4	26	16	2	3	5	7	4	3	0.714285714	2	2	5	avoided	0	0	0	0	0
2015_22	2015_22_03	2015_22_03_4_1	FE	F	E	70	28	30	28	0.4	0.4	2	0	0	1	1	0	1	0	0	1	1	1	3.25	0	3.25	8	1	9	22	4	26	16	2	3	5	7	4	3	0.714285714	2	2	5	grazed	0	0	0	0	0
2015_22	2015_22_03	2015_22_03_4_2	FE	F	E	70	28	30	28	0.4	0.4	2	0	0	1	1	0	1	0	0	1	1	1	3.25	0	3.25	8	1	9	22	4	26	16	2	3	5	7	4	3	0.714285714	2	2	5	avoided	0	0	0	0	0
NA	2015_22_04	2015_22_04_1_1	NA	NA	NA	NA	NA	NA	NA	NA	NA	NA	NA	NA	NA	NA	NA	NA	NA	NA	NA	NA	NA	NA	NA	NA	NA	NA	NA	NA	NA	NA	NA	NA	NA	NA	NA	NA	NA	NA	NA	NA	NA	grazed	0	0	0	0	0
NA	2015_22_04	2015_22_04_1_2	NA	NA	NA	NA	NA	NA	NA	NA	NA	NA	NA	NA	NA	NA	NA	NA	NA	NA	NA	NA	NA	NA	NA	NA	NA	NA	NA	NA	NA	NA	NA	NA	NA	NA	NA	NA	NA	NA	NA	NA	NA	avoided	0	0	0	0	0
NA	2015_22_04	2015_22_04_2_1	NA	NA	NA	NA	NA	NA	NA	NA	NA	NA	NA	NA	NA	NA	NA	NA	NA	NA	NA	NA	NA	NA	NA	NA	NA	NA	NA	NA	NA	NA	NA	NA	NA	NA	NA	NA	NA	NA	NA	NA	NA	grazed	0	0	0	0	0
NA	2015_22_04	2015_22_04_2_2	NA	NA	NA	NA	NA	NA	NA	NA	NA	NA	NA	NA	NA	NA	NA	NA	NA	NA	NA	NA	NA	NA	NA	NA	NA	NA	NA	NA	NA	NA	NA	NA	NA	NA	NA	NA	NA	NA	NA	NA	NA	avoided	0	0	0	0	0
NA	2015_22_04	2015_22_04_3_1	NA	NA	NA	NA	NA	NA	NA	NA	NA	NA	NA	NA	NA	NA	NA	NA	NA	NA	NA	NA	NA	NA	NA	NA	NA	NA	NA	NA	NA	NA	NA	NA	NA	NA	NA	NA	NA	NA	NA	NA	NA	grazed	0	0	0	0	0
NA	2015_22_04	2015_22_04_3_2	NA	NA	NA	NA	NA	NA	NA	NA	NA	NA	NA	NA	NA	NA	NA	NA	NA	NA	NA	NA	NA	NA	NA	NA	NA	NA	NA	NA	NA	NA	NA	NA	NA	NA	NA	NA	NA	NA	NA	NA	NA	avoided	0	0	0	0	0
NA	2015_22_04	2015_22_04_4_1	NA	NA	NA	NA	NA	NA	NA	NA	NA	NA	NA	NA	NA	NA	NA	NA	NA	NA	NA	NA	NA	NA	NA	NA	NA	NA	NA	NA	NA	NA	NA	NA	NA	NA	NA	NA	NA	NA	NA	NA	NA	grazed	0	0	0	0	0
NA	2015_22_04	2015_22_04_4_2	NA	NA	NA	NA	NA	NA	NA	NA	NA	NA	NA	NA	NA	NA	NA	NA	NA	NA	NA	NA	NA	NA	NA	NA	NA	NA	NA	NA	NA	NA	NA	NA	NA	NA	NA	NA	NA	NA	NA	NA	NA	avoided	0	0	0	0	0
2015_23	2015_23_01	2015_23_01_1_1	P_WE	P	WE	3.4	3.4	21	3.4	1	1	0.5	95	1	1	1	0	0	0	1	1	1	0	19.375	0	19.375	6	0	6	11	0	11	6.75	1	1	2	5	4	1	0.8	1	1	4	grazed	0	0	0	0	0
2015_23	2015_23_01	2015_23_01_1_2	P_WE	P	WE	3.4	3.4	21	3.4	1	1	0.5	95	1	1	1	0	0	0	1	1	1	0	19.375	0	19.375	6	0	6	11	0	11	6.75	1	1	2	5	4	1	0.8	1	1	4	avoided	0	0	0	0	0
2015_23	2015_23_01	2015_23_01_2_1	P_WE	P	WE	3.4	3.4	21	3.4	1	1	0.5	95	1	1	1	0	0	0	1	1	1	0	19.375	0	19.375	6	0	6	11	0	11	6.75	1	1	2	5	4	1	0.8	1	1	4	grazed	0	0	0	0	0
2015_23	2015_23_01	2015_23_01_2_2	P_WE	P	WE	3.4	3.4	21	3.4	1	1	0.5	95	1	1	1	0	0	0	1	1	1	0	19.375	0	19.375	6	0	6	11	0	11	6.75	1	1	2	5	4	1	0.8	1	1	4	avoided	0	0	0	0	0
2015_23	2015_23_01	2015_23_01_3_1	P_WE	P	WE	3.4	3.4	21	3.4	1	1	0.5	95	1	1	1	0	0	0	1	1	1	0	19.375	0	19.375	6	0	6	11	0	11	6.75	1	1	2	5	4	1	0.8	1	1	4	grazed	0	0	0	0	0
2015_23	2015_23_01	2015_23_01_3_2	P_WE	P	WE	3.4	3.4	21	3.4	1	1	0.5	95	1	1	1	0	0	0	1	1	1	0	19.375	0	19.375	6	0	6	11	0	11	6.75	1	1	2	5	4	1	0.8	1	1	4	avoided	0	0	0	0	0
2015_23	2015_23_01	2015_23_01_4_1	P_WE	P	WE	3.4	3.4	21	3.4	1	1	0.5	95	1	1	1	0	0	0	1	1	1	0	19.375	0	19.375	6	0	6	11	0	11	6.75	1	1	2	5	4	1	0.8	1	1	4	grazed	0	0	0	0	0
2015_23	2015_23_01	2015_23_01_4_2	P_WE	P	WE	3.4	3.4	21	3.4	1	1	0.5	95	1	1	1	0	0	0	1	1	1	0	19.375	0	19.375	6	0	6	11	0	11	6.75	1	1	2	5	4	1	0.8	1	1	4	avoided	0	0	0	0	0
NA	2015_23_02	2015_23_02_1_1	NA	NA	NA	NA	NA	NA	NA	NA	NA	NA	NA	NA	NA	NA	NA	NA	NA	NA	NA	NA	NA	NA	NA	NA	NA	NA	NA	NA	NA	NA	NA	NA	NA	NA	NA	NA	NA	NA	NA	NA	NA	grazed	0	0	0	0	0
NA	2015_23_02	2015_23_02_1_2	NA	NA	NA	NA	NA	NA	NA	NA	NA	NA	NA	NA	NA	NA	NA	NA	NA	NA	NA	NA	NA	NA	NA	NA	NA	NA	NA	NA	NA	NA	NA	NA	NA	NA	NA	NA	NA	NA	NA	NA	NA	avoided	0	0	0	0	0
NA	2015_23_02	2015_23_02_2_1	NA	NA	NA	NA	NA	NA	NA	NA	NA	NA	NA	NA	NA	NA	NA	NA	NA	NA	NA	NA	NA	NA	NA	NA	NA	NA	NA	NA	NA	NA	NA	NA	NA	NA	NA	NA	NA	NA	NA	NA	NA	grazed	0	0	0	0	0
NA	2015_23_02	2015_23_02_2_2	NA	NA	NA	NA	NA	NA	NA	NA	NA	NA	NA	NA	NA	NA	NA	NA	NA	NA	NA	NA	NA	NA	NA	NA	NA	NA	NA	NA	NA	NA	NA	NA	NA	NA	NA	NA	NA	NA	NA	NA	NA	avoided	0	0	0	0	0
NA	2015_23_02	2015_23_02_3_1	NA	NA	NA	NA	NA	NA	NA	NA	NA	NA	NA	NA	NA	NA	NA	NA	NA	NA	NA	NA	NA	NA	NA	NA	NA	NA	NA	NA	NA	NA	NA	NA	NA	NA	NA	NA	NA	NA	NA	NA	NA	grazed	0	0	0	0	0
NA	2015_23_02	2015_23_02_3_2	NA	NA	NA	NA	NA	NA	NA	NA	NA	NA	NA	NA	NA	NA	NA	NA	NA	NA	NA	NA	NA	NA	NA	NA	NA	NA	NA	NA	NA	NA	NA	NA	NA	NA	NA	NA	NA	NA	NA	NA	NA	avoided	0	0	0	0	0
NA	2015_23_02	2015_23_02_4_1	NA	NA	NA	NA	NA	NA	NA	NA	NA	NA	NA	NA	NA	NA	NA	NA	NA	NA	NA	NA	NA	NA	NA	NA	NA	NA	NA	NA	NA	NA	NA	NA	NA	NA	NA	NA	NA	NA	NA	NA	NA	grazed	0	0	0	0	0
NA	2015_23_02	2015_23_02_4_2	NA	NA	NA	NA	NA	NA	NA	NA	NA	NA	NA	NA	NA	NA	NA	NA	NA	NA	NA	NA	NA	NA	NA	NA	NA	NA	NA	NA	NA	NA	NA	NA	NA	NA	NA	NA	NA	NA	NA	NA	NA	avoided	0	0	0	0	0
NA	2015_23_03	2015_23_03_1_1	NA	NA	NA	NA	NA	NA	NA	NA	NA	NA	NA	NA	NA	NA	NA	NA	NA	NA	NA	NA	NA	NA	NA	NA	NA	NA	NA	NA	NA	NA	NA	NA	NA	NA	NA	NA	NA	NA	NA	NA	NA	grazed	0	0	0	0	0
NA	2015_23_03	2015_23_03_1_2	NA	NA	NA	NA	NA	NA	NA	NA	NA	NA	NA	NA	NA	NA	NA	NA	NA	NA	NA	NA	NA	NA	NA	NA	NA	NA	NA	NA	NA	NA	NA	NA	NA	NA	NA	NA	NA	NA	NA	NA	NA	avoided	0	0	0	0	0
NA	2015_23_03	2015_23_03_2_1	NA	NA	NA	NA	NA	NA	NA	NA	NA	NA	NA	NA	NA	NA	NA	NA	NA	NA	NA	NA	NA	NA	NA	NA	NA	NA	NA	NA	NA	NA	NA	NA	NA	NA	NA	NA	NA	NA	NA	NA	NA	grazed	0	0	0	0	0
NA	2015_23_03	2015_23_03_2_2	NA	NA	NA	NA	NA	NA	NA	NA	NA	NA	NA	NA	NA	NA	NA	NA	NA	NA	NA	NA	NA	NA	NA	NA	NA	NA	NA	NA	NA	NA	NA	NA	NA	NA	NA	NA	NA	NA	NA	NA	NA	avoided	0	0	0	0	0
NA	2015_23_03	2015_23_03_3_1	NA	NA	NA	NA	NA	NA	NA	NA	NA	NA	NA	NA	NA	NA	NA	NA	NA	NA	NA	NA	NA	NA	NA	NA	NA	NA	NA	NA	NA	NA	NA	NA	NA	NA	NA	NA	NA	NA	NA	NA	NA	grazed	0	0	0	0	0
NA	2015_23_03	2015_23_03_3_2	NA	NA	NA	NA	NA	NA	NA	NA	NA	NA	NA	NA	NA	NA	NA	NA	NA	NA	NA	NA	NA	NA	NA	NA	NA	NA	NA	NA	NA	NA	NA	NA	NA	NA	NA	NA	NA	NA	NA	NA	NA	avoided	0	0	0	0	0
NA	2015_23_03	2015_23_03_4_1	NA	NA	NA	NA	NA	NA	NA	NA	NA	NA	NA	NA	NA	NA	NA	NA	NA	NA	NA	NA	NA	NA	NA	NA	NA	NA	NA	NA	NA	NA	NA	NA	NA	NA	NA	NA	NA	NA	NA	NA	NA	grazed	0	0	0	0	0
NA	2015_23_03	2015_23_03_4_2	NA	NA	NA	NA	NA	NA	NA	NA	NA	NA	NA	NA	NA	NA	NA	NA	NA	NA	NA	NA	NA	NA	NA	NA	NA	NA	NA	NA	NA	NA	NA	NA	NA	NA	NA	NA	NA	NA	NA	NA	NA	avoided	0	0	0	0	0
NA	2015_23_04	2015_23_04_1_1	NA	NA	NA	NA	NA	NA	NA	NA	NA	NA	NA	NA	NA	NA	NA	NA	NA	NA	NA	NA	NA	NA	NA	NA	NA	NA	NA	NA	NA	NA	NA	NA	NA	NA	NA	NA	NA	NA	NA	NA	NA	grazed	0	0	0	0	0
NA	2015_23_04	2015_23_04_1_2	NA	NA	NA	NA	NA	NA	NA	NA	NA	NA	NA	NA	NA	NA	NA	NA	NA	NA	NA	NA	NA	NA	NA	NA	NA	NA	NA	NA	NA	NA	NA	NA	NA	NA	NA	NA	NA	NA	NA	NA	NA	avoided	0	0	0	0	0
NA	2015_23_04	2015_23_04_2_1	NA	NA	NA	NA	NA	NA	NA	NA	NA	NA	NA	NA	NA	NA	NA	NA	NA	NA	NA	NA	NA	NA	NA	NA	NA	NA	NA	NA	NA	NA	NA	NA	NA	NA	NA	NA	NA	NA	NA	NA	NA	grazed	0	0	0	0	0
NA	2015_23_04	2015_23_04_2_2	NA	NA	NA	NA	NA	NA	NA	NA	NA	NA	NA	NA	NA	NA	NA	NA	NA	NA	NA	NA	NA	NA	NA	NA	NA	NA	NA	NA	NA	NA	NA	NA	NA	NA	NA	NA	NA	NA	NA	NA	NA	avoided	0	0	0	0	0
NA	2015_23_04	2015_23_04_3_1	NA	NA	NA	NA	NA	NA	NA	NA	NA	NA	NA	NA	NA	NA	NA	NA	NA	NA	NA	NA	NA	NA	NA	NA	NA	NA	NA	NA	NA	NA	NA	NA	NA	NA	NA	NA	NA	NA	NA	NA	NA	grazed	0	0	0	0	0
NA	2015_23_04	2015_23_04_3_2	NA	NA	NA	NA	NA	NA	NA	NA	NA	NA	NA	NA	NA	NA	NA	NA	NA	NA	NA	NA	NA	NA	NA	NA	NA	NA	NA	NA	NA	NA	NA	NA	NA	NA	NA	NA	NA	NA	NA	NA	NA	avoided	0	0	0	0	0
NA	2015_23_04	2015_23_04_4_1	NA	NA	NA	NA	NA	NA	NA	NA	NA	NA	NA	NA	NA	NA	NA	NA	NA	NA	NA	NA	NA	NA	NA	NA	NA	NA	NA	NA	NA	NA	NA	NA	NA	NA	NA	NA	NA	NA	NA	NA	NA	grazed	0	0	0	0	0
NA	2015_23_04	2015_23_04_4_2	NA	NA	NA	NA	NA	NA	NA	NA	NA	NA	NA	NA	NA	NA	NA	NA	NA	NA	NA	NA	NA	NA	NA	NA	NA	NA	NA	NA	NA	NA	NA	NA	NA	NA	NA	NA	NA	NA	NA	NA	NA	avoided	0	0	0	0	0
2015_25	2015_25_01	2015_25_01_1_1	PE	P	E	12.8	12.8	13.8	12.8	1	1	0.5	0	0	1	1	1	1	0	0	1	0	0	16.25	0	16.25	9	0	9	14	1	15	7.25	0	1	1	5	4	1	0.363636364	5	2	2	grazed	0	0	0	0	0
2015_25	2015_25_01	2015_25_01_1_2	PE	P	E	12.8	12.8	13.8	12.8	1	1	0.5	0	0	1	1	1	1	0	0	1	0	0	16.25	0	16.25	9	0	9	14	1	15	7.25	0	1	1	5	4	1	0.363636364	5	2	2	avoided	0	0	0	0	0
2015_25	2015_25_01	2015_25_01_2_1	PE	P	E	12.8	12.8	13.8	12.8	1	1	0.5	0	0	1	1	1	1	0	0	1	0	0	16.25	0	16.25	9	0	9	14	1	15	7.25	0	1	1	5	4	1	0.363636364	5	2	2	grazed	0	0	0	0	0
2015_25	2015_25_01	2015_25_01_2_2	PE	P	E	12.8	12.8	13.8	12.8	1	1	0.5	0	0	1	1	1	1	0	0	1	0	0	16.25	0	16.25	9	0	9	14	1	15	7.25	0	1	1	5	4	1	0.363636364	5	2	2	avoided	0	0	0	0	0
2015_25	2015_25_01	2015_25_01_3_1	PE	P	E	12.8	12.8	13.8	12.8	1	1	0.5	0	0	1	1	1	1	0	0	1	0	0	16.25	0	16.25	9	0	9	14	1	15	7.25	0	1	1	5	4	1	0.363636364	5	2	2	grazed	0	0	0	0	0
2015_25	2015_25_01	2015_25_01_3_2	PE	P	E	12.8	12.8	13.8	12.8	1	1	0.5	0	0	1	1	1	1	0	0	1	0	0	16.25	0	16.25	9	0	9	14	1	15	7.25	0	1	1	5	4	1	0.363636364	5	2	2	avoided	0	0	0	0	0
2015_25	2015_25_01	2015_25_01_4_1	PE	P	E	12.8	12.8	13.8	12.8	1	1	0.5	0	0	1	1	1	1	0	0	1	0	0	16.25	0	16.25	9	0	9	14	1	15	7.25	0	1	1	5	4	1	0.363636364	5	2	2	grazed	0	0	0	0	0
2015_25	2015_25_01	2015_25_01_4_2	PE	P	E	12.8	12.8	13.8	12.8	1	1	0.5	0	0	1	1	1	1	0	0	1	0	0	16.25	0	16.25	9	0	9	14	1	15	7.25	0	1	1	5	4	1	0.363636364	5	2	2	avoided	0	0	0	0	0
2015_25	2015_25_02	2015_25_02_1_1	PE	P	E	12.8	12.8	13.8	12.8	1	1	0.5	0	0	1	1	1	1	0	0	1	0	0	31.625	0.875	32.5	6	1	7	14	1	15	7.25	1	0	1	5	3	2	0.25	3	3	1	grazed	0	0	0	0	0
2015_25	2015_25_02	2015_25_02_1_2	PE	P	E	12.8	12.8	13.8	12.8	1	1	0.5	0	0	1	1	1	1	0	0	1	0	0	31.625	0.875	32.5	6	1	7	14	1	15	7.25	1	0	1	5	3	2	0.25	3	3	1	avoided	0	0	0	0	0
2015_25	2015_25_02	2015_25_02_2_1	PE	P	E	12.8	12.8	13.8	12.8	1	1	0.5	0	0	1	1	1	1	0	0	1	0	0	31.625	0.875	32.5	6	1	7	14	1	15	7.25	1	0	1	5	3	2	0.25	3	3	1	grazed	0	0	0	0	0
2015_25	2015_25_02	2015_25_02_2_2	PE	P	E	12.8	12.8	13.8	12.8	1	1	0.5	0	0	1	1	1	1	0	0	1	0	0	31.625	0.875	32.5	6	1	7	14	1	15	7.25	1	0	1	5	3	2	0.25	3	3	1	avoided	0	0	0	0	0
2015_25	2015_25_02	2015_25_02_3_1	PE	P	E	12.8	12.8	13.8	12.8	1	1	0.5	0	0	1	1	1	1	0	0	1	0	0	31.625	0.875	32.5	6	1	7	14	1	15	7.25	1	0	1	5	3	2	0.25	3	3	1	grazed	0	0	0	0	0
2015_25	2015_25_02	2015_25_02_3_2	PE	P	E	12.8	12.8	13.8	12.8	1	1	0.5	0	0	1	1	1	1	0	0	1	0	0	31.625	0.875	32.5	6	1	7	14	1	15	7.25	1	0	1	5	3	2	0.25	3	3	1	avoided	0	0	0	0	0
2015_25	2015_25_02	2015_25_02_4_1	PE	P	E	12.8	12.8	13.8	12.8	1	1	0.5	0	0	1	1	1	1	0	0	1	0	0	31.625	0.875	32.5	6	1	7	14	1	15	7.25	1	0	1	5	3	2	0.25	3	3	1	grazed	0	0	0	0	0
2015_25	2015_25_02	2015_25_02_4_2	PE	P	E	12.8	12.8	13.8	12.8	1	1	0.5	0	0	1	1	1	1	0	0	1	0	0	31.625	0.875	32.5	6	1	7	14	1	15	7.25	1	0	1	5	3	2	0.25	3	3	1	avoided	0	0	0	0	0
NA	2015_25_03	2015_25_03_1_1	NA	NA	NA	NA	NA	NA	NA	NA	NA	NA	NA	NA	NA	NA	NA	NA	NA	NA	NA	NA	NA	NA	NA	NA	NA	NA	NA	NA	NA	NA	NA	NA	NA	NA	NA	NA	NA	NA	NA	NA	NA	grazed	0	0	0	0	0
NA	2015_25_03	2015_25_03_1_2	NA	NA	NA	NA	NA	NA	NA	NA	NA	NA	NA	NA	NA	NA	NA	NA	NA	NA	NA	NA	NA	NA	NA	NA	NA	NA	NA	NA	NA	NA	NA	NA	NA	NA	NA	NA	NA	NA	NA	NA	NA	avoided	0	0	0	0	0
NA	2015_25_03	2015_25_03_2_1	NA	NA	NA	NA	NA	NA	NA	NA	NA	NA	NA	NA	NA	NA	NA	NA	NA	NA	NA	NA	NA	NA	NA	NA	NA	NA	NA	NA	NA	NA	NA	NA	NA	NA	NA	NA	NA	NA	NA	NA	NA	grazed	0	0	0	0	0
NA	2015_25_03	2015_25_03_2_2	NA	NA	NA	NA	NA	NA	NA	NA	NA	NA	NA	NA	NA	NA	NA	NA	NA	NA	NA	NA	NA	NA	NA	NA	NA	NA	NA	NA	NA	NA	NA	NA	NA	NA	NA	NA	NA	NA	NA	NA	NA	avoided	0	0	0	0	0
NA	2015_25_03	2015_25_03_3_1	NA	NA	NA	NA	NA	NA	NA	NA	NA	NA	NA	NA	NA	NA	NA	NA	NA	NA	NA	NA	NA	NA	NA	NA	NA	NA	NA	NA	NA	NA	NA	NA	NA	NA	NA	NA	NA	NA	NA	NA	NA	grazed	0	0	0	0	0
NA	2015_25_03	2015_25_03_3_2	NA	NA	NA	NA	NA	NA	NA	NA	NA	NA	NA	NA	NA	NA	NA	NA	NA	NA	NA	NA	NA	NA	NA	NA	NA	NA	NA	NA	NA	NA	NA	NA	NA	NA	NA	NA	NA	NA	NA	NA	NA	avoided	0	0	0	0	0
NA	2015_25_03	2015_25_03_4_1	NA	NA	NA	NA	NA	NA	NA	NA	NA	NA	NA	NA	NA	NA	NA	NA	NA	NA	NA	NA	NA	NA	NA	NA	NA	NA	NA	NA	NA	NA	NA	NA	NA	NA	NA	NA	NA	NA	NA	NA	NA	grazed	0	0	0	0	0
NA	2015_25_03	2015_25_03_4_2	NA	NA	NA	NA	NA	NA	NA	NA	NA	NA	NA	NA	NA	NA	NA	NA	NA	NA	NA	NA	NA	NA	NA	NA	NA	NA	NA	NA	NA	NA	NA	NA	NA	NA	NA	NA	NA	NA	NA	NA	NA	avoided	0	0	0	0	0
2015_25	2015_25_04	2015_25_04_1_1	PE	P	E	12.8	12.8	13.8	12.8	1	1	0.5	0	0	1	1	1	1	0	0	1	0	1	8.125	0	8.125	8	0	8	14	1	15	7.25	1	0	1	5	2	3	0.4	4	2	2	grazed	0	0	0	0	0
2015_25	2015_25_04	2015_25_04_1_2	PE	P	E	12.8	12.8	13.8	12.8	1	1	0.5	0	0	1	1	1	1	0	0	1	0	1	8.125	0	8.125	8	0	8	14	1	15	7.25	1	0	1	5	2	3	0.4	4	2	2	avoided	0	0	0	0	0
2015_25	2015_25_04	2015_25_04_2_1	PE	P	E	12.8	12.8	13.8	12.8	1	1	0.5	0	0	1	1	1	1	0	0	1	0	1	8.125	0	8.125	8	0	8	14	1	15	7.25	1	0	1	5	2	3	0.4	4	2	2	grazed	0	0	0	0	0
2015_25	2015_25_04	2015_25_04_2_2	PE	P	E	12.8	12.8	13.8	12.8	1	1	0.5	0	0	1	1	1	1	0	0	1	0	1	8.125	0	8.125	8	0	8	14	1	15	7.25	1	0	1	5	2	3	0.4	4	2	2	avoided	0	0	0	0	0
2015_25	2015_25_04	2015_25_04_3_1	PE	P	E	12.8	12.8	13.8	12.8	1	1	0.5	0	0	1	1	1	1	0	0	1	0	1	8.125	0	8.125	8	0	8	14	1	15	7.25	1	0	1	5	2	3	0.4	4	2	2	grazed	0	0	0	0	0
2015_25	2015_25_04	2015_25_04_3_2	PE	P	E	12.8	12.8	13.8	12.8	1	1	0.5	0	0	1	1	1	1	0	0	1	0	1	8.125	0	8.125	8	0	8	14	1	15	7.25	1	0	1	5	2	3	0.4	4	2	2	avoided	0	0	0	0	0
2015_25	2015_25_04	2015_25_04_4_1	PE	P	E	12.8	12.8	13.8	12.8	1	1	0.5	0	0	1	1	1	1	0	0	1	0	1	8.125	0	8.125	8	0	8	14	1	15	7.25	1	0	1	5	2	3	0.4	4	2	2	grazed	0	0	0	0	0
2015_25	2015_25_04	2015_25_04_4_2	PE	P	E	12.8	12.8	13.8	12.8	1	1	0.5	0	0	1	1	1	1	0	0	1	0	1	8.125	0	8.125	8	0	8	14	1	15	7.25	1	0	1	5	2	3	0.4	4	2	2	avoided	0	0	0	0	0
2015_26	2015_26_01	2015_26_01_1_1	PE	P	E	23.5	23.5	24	23.5	1	1	2.25	0	0	1	1	1	1	0	0	0	1	1	21.875	5.625	27.5	9	1	10	16	2	18	8.75	3	0	3	5	3	2	0.75	2	2	6	grazed	0	0	0	0	0
2015_26	2015_26_01	2015_26_01_1_2	PE	P	E	23.5	23.5	24	23.5	1	1	2.25	0	0	1	1	1	1	0	0	0	1	1	21.875	5.625	27.5	9	1	10	16	2	18	8.75	3	0	3	5	3	2	0.75	2	2	6	avoided	0	0	0	0	0
2015_26	2015_26_01	2015_26_01_2_1	PE	P	E	23.5	23.5	24	23.5	1	1	2.25	0	0	1	1	1	1	0	0	0	1	1	21.875	5.625	27.5	9	1	10	16	2	18	8.75	3	0	3	5	3	2	0.75	2	2	6	grazed	0	0	0	0	0
2015_26	2015_26_01	2015_26_01_2_2	PE	P	E	23.5	23.5	24	23.5	1	1	2.25	0	0	1	1	1	1	0	0	0	1	1	21.875	5.625	27.5	9	1	10	16	2	18	8.75	3	0	3	5	3	2	0.75	2	2	6	avoided	0	0	0	0	0
2015_26	2015_26_01	2015_26_01_3_1	PE	P	E	23.5	23.5	24	23.5	1	1	2.25	0	0	1	1	1	1	0	0	0	1	1	21.875	5.625	27.5	9	1	10	16	2	18	8.75	3	0	3	5	3	2	0.75	2	2	6	grazed	0	0	0	0	0
2015_26	2015_26_01	2015_26_01_3_2	PE	P	E	23.5	23.5	24	23.5	1	1	2.25	0	0	1	1	1	1	0	0	0	1	1	21.875	5.625	27.5	9	1	10	16	2	18	8.75	3	0	3	5	3	2	0.75	2	2	6	avoided	0	0	0	0	0
2015_26	2015_26_01	2015_26_01_4_1	PE	P	E	23.5	23.5	24	23.5	1	1	2.25	0	0	1	1	1	1	0	0	0	1	1	21.875	5.625	27.5	9	1	10	16	2	18	8.75	3	0	3	5	3	2	0.75	2	2	6	grazed	0	0	0	0	0
2015_26	2015_26_01	2015_26_01_4_2	PE	P	E	23.5	23.5	24	23.5	1	1	2.25	0	0	1	1	1	1	0	0	0	1	1	21.875	5.625	27.5	9	1	10	16	2	18	8.75	3	0	3	5	3	2	0.75	2	2	6	avoided	0	0	0	0	0
NA	2015_26_02	2015_26_02_1_1	NA	NA	NA	NA	NA	NA	NA	NA	NA	NA	NA	NA	NA	NA	NA	NA	NA	NA	NA	NA	NA	NA	NA	NA	NA	NA	NA	NA	NA	NA	NA	NA	NA	NA	NA	NA	NA	NA	NA	NA	NA	grazed	0	0	0	0	0
NA	2015_26_02	2015_26_02_1_2	NA	NA	NA	NA	NA	NA	NA	NA	NA	NA	NA	NA	NA	NA	NA	NA	NA	NA	NA	NA	NA	NA	NA	NA	NA	NA	NA	NA	NA	NA	NA	NA	NA	NA	NA	NA	NA	NA	NA	NA	NA	avoided	1	0	0	0	0
NA	2015_26_02	2015_26_02_2_1	NA	NA	NA	NA	NA	NA	NA	NA	NA	NA	NA	NA	NA	NA	NA	NA	NA	NA	NA	NA	NA	NA	NA	NA	NA	NA	NA	NA	NA	NA	NA	NA	NA	NA	NA	NA	NA	NA	NA	NA	NA	grazed	0	0	0	0	0
NA	2015_26_02	2015_26_02_2_2	NA	NA	NA	NA	NA	NA	NA	NA	NA	NA	NA	NA	NA	NA	NA	NA	NA	NA	NA	NA	NA	NA	NA	NA	NA	NA	NA	NA	NA	NA	NA	NA	NA	NA	NA	NA	NA	NA	NA	NA	NA	avoided	0	0	0	0	0
NA	2015_26_02	2015_26_02_3_1	NA	NA	NA	NA	NA	NA	NA	NA	NA	NA	NA	NA	NA	NA	NA	NA	NA	NA	NA	NA	NA	NA	NA	NA	NA	NA	NA	NA	NA	NA	NA	NA	NA	NA	NA	NA	NA	NA	NA	NA	NA	grazed	0	0	0	0	0
NA	2015_26_02	2015_26_02_3_2	NA	NA	NA	NA	NA	NA	NA	NA	NA	NA	NA	NA	NA	NA	NA	NA	NA	NA	NA	NA	NA	NA	NA	NA	NA	NA	NA	NA	NA	NA	NA	NA	NA	NA	NA	NA	NA	NA	NA	NA	NA	avoided	0	0	0	0	0
NA	2015_26_02	2015_26_02_4_1	NA	NA	NA	NA	NA	NA	NA	NA	NA	NA	NA	NA	NA	NA	NA	NA	NA	NA	NA	NA	NA	NA	NA	NA	NA	NA	NA	NA	NA	NA	NA	NA	NA	NA	NA	NA	NA	NA	NA	NA	NA	grazed	0	0	0	0	0
NA	2015_26_02	2015_26_02_4_2	NA	NA	NA	NA	NA	NA	NA	NA	NA	NA	NA	NA	NA	NA	NA	NA	NA	NA	NA	NA	NA	NA	NA	NA	NA	NA	NA	NA	NA	NA	NA	NA	NA	NA	NA	NA	NA	NA	NA	NA	NA	avoided	0	0	0	0	0
2015_26	2015_26_03	2015_26_03_1_1	PE	P	E	23.5	23.5	24	23.5	1	1	2.25	0	0	1	1	1	1	0	0	0	1	1	38	12	50	9	2	11	16	2	18	8.75	1	2	3	5	3	2	0.625	4	2	5	grazed	1	0	0	0	0
2015_26	2015_26_03	2015_26_03_1_2	PE	P	E	23.5	23.5	24	23.5	1	1	2.25	0	0	1	1	1	1	0	0	0	1	1	38	12	50	9	2	11	16	2	18	8.75	1	2	3	5	3	2	0.625	4	2	5	avoided	1	0	0	0	0
2015_26	2015_26_03	2015_26_03_2_1	PE	P	E	23.5	23.5	24	23.5	1	1	2.25	0	0	1	1	1	1	0	0	0	1	1	38	12	50	9	2	11	16	2	18	8.75	1	2	3	5	3	2	0.625	4	2	5	grazed	1	0	0	0	0
2015_26	2015_26_03	2015_26_03_2_2	PE	P	E	23.5	23.5	24	23.5	1	1	2.25	0	0	1	1	1	1	0	0	0	1	1	38	12	50	9	2	11	16	2	18	8.75	1	2	3	5	3	2	0.625	4	2	5	avoided	1	0	0	0	0
2015_26	2015_26_03	2015_26_03_3_1	PE	P	E	23.5	23.5	24	23.5	1	1	2.25	0	0	1	1	1	1	0	0	0	1	1	38	12	50	9	2	11	16	2	18	8.75	1	2	3	5	3	2	0.625	4	2	5	grazed	1	0	0	0	0
2015_26	2015_26_03	2015_26_03_3_2	PE	P	E	23.5	23.5	24	23.5	1	1	2.25	0	0	1	1	1	1	0	0	0	1	1	38	12	50	9	2	11	16	2	18	8.75	1	2	3	5	3	2	0.625	4	2	5	avoided	1	0	0	0	0
2015_26	2015_26_03	2015_26_03_4_1	PE	P	E	23.5	23.5	24	23.5	1	1	2.25	0	0	1	1	1	1	0	0	0	1	1	38	12	50	9	2	11	16	2	18	8.75	1	2	3	5	3	2	0.625	4	2	5	grazed	1	0	0	0	0
2015_26	2015_26_03	2015_26_03_4_2	PE	P	E	23.5	23.5	24	23.5	1	1	2.25	0	0	1	1	1	1	0	0	0	1	1	38	12	50	9	2	11	16	2	18	8.75	1	2	3	5	3	2	0.625	4	2	5	avoided	1	0	0	0	0
2015_26	2015_26_04	2015_26_04_1_1	PE	P	E	23.5	23.5	24	23.5	1	1	2.25	0	0	1	1	1	1	0	0	0	1	0	16.25	6.25	22.5	8	1	9	16	2	18	8.75	1	2	3	5	1	4	0.8	1	2	6	grazed	0	0	0	0	0
2015_26	2015_26_04	2015_26_04_1_2	PE	P	E	23.5	23.5	24	23.5	1	1	2.25	0	0	1	1	1	1	0	0	0	1	0	16.25	6.25	22.5	8	1	9	16	2	18	8.75	1	2	3	5	1	4	0.8	1	2	6	avoided	0	0	0	0	0
2015_26	2015_26_04	2015_26_04_2_1	PE	P	E	23.5	23.5	24	23.5	1	1	2.25	0	0	1	1	1	1	0	0	0	1	0	16.25	6.25	22.5	8	1	9	16	2	18	8.75	1	2	3	5	1	4	0.8	1	2	6	grazed	0	0	0	0	0
2015_26	2015_26_04	2015_26_04_2_2	PE	P	E	23.5	23.5	24	23.5	1	1	2.25	0	0	1	1	1	1	0	0	0	1	0	16.25	6.25	22.5	8	1	9	16	2	18	8.75	1	2	3	5	1	4	0.8	1	2	6	avoided	0	0	0	0	0
2015_26	2015_26_04	2015_26_04_3_1	PE	P	E	23.5	23.5	24	23.5	1	1	2.25	0	0	1	1	1	1	0	0	0	1	0	16.25	6.25	22.5	8	1	9	16	2	18	8.75	1	2	3	5	1	4	0.8	1	2	6	grazed	1	0	0	0	0
2015_26	2015_26_04	2015_26_04_3_2	PE	P	E	23.5	23.5	24	23.5	1	1	2.25	0	0	1	1	1	1	0	0	0	1	0	16.25	6.25	22.5	8	1	9	16	2	18	8.75	1	2	3	5	1	4	0.8	1	2	6	avoided	0	0	0	0	0
2015_26	2015_26_04	2015_26_04_4_1	PE	P	E	23.5	23.5	24	23.5	1	1	2.25	0	0	1	1	1	1	0	0	0	1	0	16.25	6.25	22.5	8	1	9	16	2	18	8.75	1	2	3	5	1	4	0.8	1	2	6	grazed	1	0	0	0	0
2015_26	2015_26_04	2015_26_04_4_2	PE	P	E	23.5	23.5	24	23.5	1	1	2.25	0	0	1	1	1	1	0	0	0	1	0	16.25	6.25	22.5	8	1	9	16	2	18	8.75	1	2	3	5	1	4	0.8	1	2	6	avoided	1	0	0	0	0
2016_01	2016_01_01	2016_01_01_1_1	FWE	F	WE	15.01	15.01	40.8	15.01	1	1	2.75	80	0	1	1	0	1	0	0	0	1	0	9.25	0	9.25	7	0	7	11	1	12	7.5	0	1	1	5	5	0	0.833333333	1	1	5	grazed	0	0	0	0	0
2016_01	2016_01_01	2016_01_01_1_2	FWE	F	WE	15.01	15.01	40.8	15.01	1	1	2.75	80	0	1	1	0	1	0	0	0	1	0	9.25	0	9.25	7	0	7	11	1	12	7.5	0	1	1	5	5	0	0.833333333	1	1	5	avoided	0	0	0	0	0
2016_01	2016_01_01	2016_01_01_2_1	FWE	F	WE	15.01	15.01	40.8	15.01	1	1	2.75	80	0	1	1	0	1	0	0	0	1	0	9.25	0	9.25	7	0	7	11	1	12	7.5	0	1	1	5	5	0	0.833333333	1	1	5	grazed	0	0	0	0	0
2016_01	2016_01_01	2016_01_01_2_2	FWE	F	WE	15.01	15.01	40.8	15.01	1	1	2.75	80	0	1	1	0	1	0	0	0	1	0	9.25	0	9.25	7	0	7	11	1	12	7.5	0	1	1	5	5	0	0.833333333	1	1	5	avoided	0	0	0	0	0
2016_01	2016_01_01	2016_01_01_3_1	FWE	F	WE	15.01	15.01	40.8	15.01	1	1	2.75	80	0	1	1	0	1	0	0	0	1	0	9.25	0	9.25	7	0	7	11	1	12	7.5	0	1	1	5	5	0	0.833333333	1	1	5	grazed	0	0	0	0	0
2016_01	2016_01_01	2016_01_01_3_2	FWE	F	WE	15.01	15.01	40.8	15.01	1	1	2.75	80	0	1	1	0	1	0	0	0	1	0	9.25	0	9.25	7	0	7	11	1	12	7.5	0	1	1	5	5	0	0.833333333	1	1	5	avoided	0	0	0	0	0
2016_01	2016_01_01	2016_01_01_4_1	FWE	F	WE	15.01	15.01	40.8	15.01	1	1	2.75	80	0	1	1	0	1	0	0	0	1	0	9.25	0	9.25	7	0	7	11	1	12	7.5	0	1	1	5	5	0	0.833333333	1	1	5	grazed	0	0	0	0	0
2016_01	2016_01_01	2016_01_01_4_2	FWE	F	WE	15.01	15.01	40.8	15.01	1	1	2.75	80	0	1	1	0	1	0	0	0	1	0	9.25	0	9.25	7	0	7	11	1	12	7.5	0	1	1	5	5	0	0.833333333	1	1	5	avoided	0	0	0	0	0
NA	2016_01_02	2016_01_02_1_1	NA	NA	NA	NA	NA	NA	NA	NA	NA	NA	NA	NA	NA	NA	NA	NA	NA	NA	NA	NA	NA	NA	NA	NA	NA	NA	NA	NA	NA	NA	NA	NA	NA	NA	NA	NA	NA	NA	NA	NA	NA	grazed	0	0	0	0	0
NA	2016_01_02	2016_01_02_1_2	NA	NA	NA	NA	NA	NA	NA	NA	NA	NA	NA	NA	NA	NA	NA	NA	NA	NA	NA	NA	NA	NA	NA	NA	NA	NA	NA	NA	NA	NA	NA	NA	NA	NA	NA	NA	NA	NA	NA	NA	NA	avoided	0	0	0	0	0
NA	2016_01_02	2016_01_02_2_1	NA	NA	NA	NA	NA	NA	NA	NA	NA	NA	NA	NA	NA	NA	NA	NA	NA	NA	NA	NA	NA	NA	NA	NA	NA	NA	NA	NA	NA	NA	NA	NA	NA	NA	NA	NA	NA	NA	NA	NA	NA	grazed	0	0	0	0	0
NA	2016_01_02	2016_01_02_2_2	NA	NA	NA	NA	NA	NA	NA	NA	NA	NA	NA	NA	NA	NA	NA	NA	NA	NA	NA	NA	NA	NA	NA	NA	NA	NA	NA	NA	NA	NA	NA	NA	NA	NA	NA	NA	NA	NA	NA	NA	NA	avoided	0	0	0	0	0
NA	2016_01_02	2016_01_02_3_1	NA	NA	NA	NA	NA	NA	NA	NA	NA	NA	NA	NA	NA	NA	NA	NA	NA	NA	NA	NA	NA	NA	NA	NA	NA	NA	NA	NA	NA	NA	NA	NA	NA	NA	NA	NA	NA	NA	NA	NA	NA	grazed	0	0	0	0	0
NA	2016_01_02	2016_01_02_3_2	NA	NA	NA	NA	NA	NA	NA	NA	NA	NA	NA	NA	NA	NA	NA	NA	NA	NA	NA	NA	NA	NA	NA	NA	NA	NA	NA	NA	NA	NA	NA	NA	NA	NA	NA	NA	NA	NA	NA	NA	NA	avoided	0	0	0	0	0
NA	2016_01_02	2016_01_02_4_1	NA	NA	NA	NA	NA	NA	NA	NA	NA	NA	NA	NA	NA	NA	NA	NA	NA	NA	NA	NA	NA	NA	NA	NA	NA	NA	NA	NA	NA	NA	NA	NA	NA	NA	NA	NA	NA	NA	NA	NA	NA	grazed	0	0	0	0	0
NA	2016_01_02	2016_01_02_4_2	NA	NA	NA	NA	NA	NA	NA	NA	NA	NA	NA	NA	NA	NA	NA	NA	NA	NA	NA	NA	NA	NA	NA	NA	NA	NA	NA	NA	NA	NA	NA	NA	NA	NA	NA	NA	NA	NA	NA	NA	NA	avoided	0	0	0	0	0
NA	2016_01_03	2016_01_03_1_1	NA	NA	NA	NA	NA	NA	NA	NA	NA	NA	NA	NA	NA	NA	NA	NA	NA	NA	NA	NA	NA	NA	NA	NA	NA	NA	NA	NA	NA	NA	NA	NA	NA	NA	NA	NA	NA	NA	NA	NA	NA	grazed	0	0	0	0	0
NA	2016_01_03	2016_01_03_1_2	NA	NA	NA	NA	NA	NA	NA	NA	NA	NA	NA	NA	NA	NA	NA	NA	NA	NA	NA	NA	NA	NA	NA	NA	NA	NA	NA	NA	NA	NA	NA	NA	NA	NA	NA	NA	NA	NA	NA	NA	NA	avoided	0	0	0	0	0
NA	2016_01_03	2016_01_03_2_1	NA	NA	NA	NA	NA	NA	NA	NA	NA	NA	NA	NA	NA	NA	NA	NA	NA	NA	NA	NA	NA	NA	NA	NA	NA	NA	NA	NA	NA	NA	NA	NA	NA	NA	NA	NA	NA	NA	NA	NA	NA	grazed	0	0	0	0	0
NA	2016_01_03	2016_01_03_2_2	NA	NA	NA	NA	NA	NA	NA	NA	NA	NA	NA	NA	NA	NA	NA	NA	NA	NA	NA	NA	NA	NA	NA	NA	NA	NA	NA	NA	NA	NA	NA	NA	NA	NA	NA	NA	NA	NA	NA	NA	NA	avoided	0	0	0	0	0
NA	2016_01_03	2016_01_03_3_1	NA	NA	NA	NA	NA	NA	NA	NA	NA	NA	NA	NA	NA	NA	NA	NA	NA	NA	NA	NA	NA	NA	NA	NA	NA	NA	NA	NA	NA	NA	NA	NA	NA	NA	NA	NA	NA	NA	NA	NA	NA	grazed	0	0	0	0	0
NA	2016_01_03	2016_01_03_3_2	NA	NA	NA	NA	NA	NA	NA	NA	NA	NA	NA	NA	NA	NA	NA	NA	NA	NA	NA	NA	NA	NA	NA	NA	NA	NA	NA	NA	NA	NA	NA	NA	NA	NA	NA	NA	NA	NA	NA	NA	NA	avoided	0	0	0	0	0
NA	2016_01_03	2016_01_03_4_1	NA	NA	NA	NA	NA	NA	NA	NA	NA	NA	NA	NA	NA	NA	NA	NA	NA	NA	NA	NA	NA	NA	NA	NA	NA	NA	NA	NA	NA	NA	NA	NA	NA	NA	NA	NA	NA	NA	NA	NA	NA	grazed	0	0	0	0	0
NA	2016_01_03	2016_01_03_4_2	NA	NA	NA	NA	NA	NA	NA	NA	NA	NA	NA	NA	NA	NA	NA	NA	NA	NA	NA	NA	NA	NA	NA	NA	NA	NA	NA	NA	NA	NA	NA	NA	NA	NA	NA	NA	NA	NA	NA	NA	NA	avoided	0	0	0	0	0
2016_01	2016_01_04	2016_01_04_1_1	FWE	F	WE	15.01	15.01	40.8	15.01	1	1	2.75	80	0	1	1	0	1	0	0	0	1	1	5	0.375	5.375	7	1	8	11	1	12	7.5	1	0	1	5	2	3	0.4	5	1	2	grazed	0	0	0	0	0
2016_01	2016_01_04	2016_01_04_1_2	FWE	F	WE	15.01	15.01	40.8	15.01	1	1	2.75	80	0	1	1	0	1	0	0	0	1	1	5	0.375	5.375	7	1	8	11	1	12	7.5	1	0	1	5	2	3	0.4	5	1	2	avoided	0	0	0	0	0
2016_01	2016_01_04	2016_01_04_2_1	FWE	F	WE	15.01	15.01	40.8	15.01	1	1	2.75	80	0	1	1	0	1	0	0	0	1	1	5	0.375	5.375	7	1	8	11	1	12	7.5	1	0	1	5	2	3	0.4	5	1	2	grazed	1	0	0	0	0
2016_01	2016_01_04	2016_01_04_2_2	FWE	F	WE	15.01	15.01	40.8	15.01	1	1	2.75	80	0	1	1	0	1	0	0	0	1	1	5	0.375	5.375	7	1	8	11	1	12	7.5	1	0	1	5	2	3	0.4	5	1	2	avoided	1	0	0	0	0
2016_01	2016_01_04	2016_01_04_3_1	FWE	F	WE	15.01	15.01	40.8	15.01	1	1	2.75	80	0	1	1	0	1	0	0	0	1	1	5	0.375	5.375	7	1	8	11	1	12	7.5	1	0	1	5	2	3	0.4	5	1	2	grazed	0	0	0	0	0
2016_01	2016_01_04	2016_01_04_3_2	FWE	F	WE	15.01	15.01	40.8	15.01	1	1	2.75	80	0	1	1	0	1	0	0	0	1	1	5	0.375	5.375	7	1	8	11	1	12	7.5	1	0	1	5	2	3	0.4	5	1	2	avoided	0	0	0	0	0
2016_01	2016_01_04	2016_01_04_4_1	FWE	F	WE	15.01	15.01	40.8	15.01	1	1	2.75	80	0	1	1	0	1	0	0	0	1	1	5	0.375	5.375	7	1	8	11	1	12	7.5	1	0	1	5	2	3	0.4	5	1	2	grazed	0	0	0	0	0
2016_01	2016_01_04	2016_01_04_4_2	FWE	F	WE	15.01	15.01	40.8	15.01	1	1	2.75	80	0	1	1	0	1	0	0	0	1	1	5	0.375	5.375	7	1	8	11	1	12	7.5	1	0	1	5	2	3	0.4	5	1	2	avoided	0	0	0	0	0
2016_02	2016_02_01	2016_02_01_1_1	P_WE	P	WE	90.604	90.604	20.5	90.604	1	1	1.75	50	0	0	0	0	0	0	0	0	0	0	14	4.4	18.4	9	1	10	14	2	16	6.25	2	2	4	5	4	1	0.571428571	3	3	4	grazed	0	0	0	0	0
2016_02	2016_02_01	2016_02_01_1_2	P_WE	P	WE	90.604	90.604	20.5	90.604	1	1	1.75	50	0	0	0	0	0	0	0	0	0	0	14	4.4	18.4	9	1	10	14	2	16	6.25	2	2	4	5	4	1	0.571428571	3	3	4	avoided	0	0	0	0	0
2016_02	2016_02_01	2016_02_01_2_1	P_WE	P	WE	90.604	90.604	20.5	90.604	1	1	1.75	50	0	0	0	0	0	0	0	0	0	0	14	4.4	18.4	9	1	10	14	2	16	6.25	2	2	4	5	4	1	0.571428571	3	3	4	grazed	0	0	0	0	0
2016_02	2016_02_01	2016_02_01_2_2	P_WE	P	WE	90.604	90.604	20.5	90.604	1	1	1.75	50	0	0	0	0	0	0	0	0	0	0	14	4.4	18.4	9	1	10	14	2	16	6.25	2	2	4	5	4	1	0.571428571	3	3	4	avoided	0	0	0	0	0
2016_02	2016_02_01	2016_02_01_3_1	P_WE	P	WE	90.604	90.604	20.5	90.604	1	1	1.75	50	0	0	0	0	0	0	0	0	0	0	14	4.4	18.4	9	1	10	14	2	16	6.25	2	2	4	5	4	1	0.571428571	3	3	4	grazed	0	0	0	0	0
2016_02	2016_02_01	2016_02_01_3_2	P_WE	P	WE	90.604	90.604	20.5	90.604	1	1	1.75	50	0	0	0	0	0	0	0	0	0	0	14	4.4	18.4	9	1	10	14	2	16	6.25	2	2	4	5	4	1	0.571428571	3	3	4	avoided	0	0	0	0	0
2016_02	2016_02_01	2016_02_01_4_1	P_WE	P	WE	90.604	90.604	20.5	90.604	1	1	1.75	50	0	0	0	0	0	0	0	0	0	0	14	4.4	18.4	9	1	10	14	2	16	6.25	2	2	4	5	4	1	0.571428571	3	3	4	grazed	0	0	0	0	0
2016_02	2016_02_01	2016_02_01_4_2	P_WE	P	WE	90.604	90.604	20.5	90.604	1	1	1.75	50	0	0	0	0	0	0	0	0	0	0	14	4.4	18.4	9	1	10	14	2	16	6.25	2	2	4	5	4	1	0.571428571	3	3	4	avoided	0	0	0	0	0
2016_02	2016_02_02	2016_02_02_1_1	P_WE	P	WE	90.604	90.604	20.5	90.604	1	1	1.75	50	0	0	0	0	0	0	0	0	0	0	7.3	0.275	7.575	4	2	6	14	2	16	6.25	2	2	4	5	2	3	0.666666667	1	2	3	grazed	0	0	0	0	0
2016_02	2016_02_02	2016_02_02_1_2	P_WE	P	WE	90.604	90.604	20.5	90.604	1	1	1.75	50	0	0	0	0	0	0	0	0	0	0	7.3	0.275	7.575	4	2	6	14	2	16	6.25	2	2	4	5	2	3	0.666666667	1	2	3	avoided	0	0	0	0	0
2016_02	2016_02_02	2016_02_02_2_1	P_WE	P	WE	90.604	90.604	20.5	90.604	1	1	1.75	50	0	0	0	0	0	0	0	0	0	0	7.3	0.275	7.575	4	2	6	14	2	16	6.25	2	2	4	5	2	3	0.666666667	1	2	3	grazed	0	0	0	0	0
2016_02	2016_02_02	2016_02_02_2_2	P_WE	P	WE	90.604	90.604	20.5	90.604	1	1	1.75	50	0	0	0	0	0	0	0	0	0	0	7.3	0.275	7.575	4	2	6	14	2	16	6.25	2	2	4	5	2	3	0.666666667	1	2	3	avoided	0	0	0	0	0
2016_02	2016_02_02	2016_02_02_3_1	P_WE	P	WE	90.604	90.604	20.5	90.604	1	1	1.75	50	0	0	0	0	0	0	0	0	0	0	7.3	0.275	7.575	4	2	6	14	2	16	6.25	2	2	4	5	2	3	0.666666667	1	2	3	grazed	0	0	0	0	0
2016_02	2016_02_02	2016_02_02_3_2	P_WE	P	WE	90.604	90.604	20.5	90.604	1	1	1.75	50	0	0	0	0	0	0	0	0	0	0	7.3	0.275	7.575	4	2	6	14	2	16	6.25	2	2	4	5	2	3	0.666666667	1	2	3	avoided	0	0	0	0	0
2016_02	2016_02_02	2016_02_02_4_1	P_WE	P	WE	90.604	90.604	20.5	90.604	1	1	1.75	50	0	0	0	0	0	0	0	0	0	0	7.3	0.275	7.575	4	2	6	14	2	16	6.25	2	2	4	5	2	3	0.666666667	1	2	3	grazed	0	0	0	0	0
2016_02	2016_02_02	2016_02_02_4_2	P_WE	P	WE	90.604	90.604	20.5	90.604	1	1	1.75	50	0	0	0	0	0	0	0	0	0	0	7.3	0.275	7.575	4	2	6	14	2	16	6.25	2	2	4	5	2	3	0.666666667	1	2	3	avoided	0	0	0	0	0
2016_02	2016_02_03	2016_02_03_1_1	P_WE	P	WE	90.604	90.604	20.5	90.604	1	1	1.75	50	0	0	1	0	1	0	0	0	1	0	3.025	0.4375	3.4625	9	2	11	14	2	16	6.25	2	2	4	5	3	2	0.705882353	2	3	6	grazed	0	0	0	0	0
2016_02	2016_02_03	2016_02_03_1_2	P_WE	P	WE	90.604	90.604	20.5	90.604	1	1	1.75	50	0	0	1	0	1	0	0	0	1	0	3.025	0.4375	3.4625	9	2	11	14	2	16	6.25	2	2	4	5	3	2	0.705882353	2	3	6	avoided	0	0	0	0	0
2016_02	2016_02_03	2016_02_03_2_1	P_WE	P	WE	90.604	90.604	20.5	90.604	1	1	1.75	50	0	0	1	0	1	0	0	0	1	0	3.025	0.4375	3.4625	9	2	11	14	2	16	6.25	2	2	4	5	3	2	0.705882353	2	3	6	grazed	1	0	0	0	0
2016_02	2016_02_03	2016_02_03_2_2	P_WE	P	WE	90.604	90.604	20.5	90.604	1	1	1.75	50	0	0	1	0	1	0	0	0	1	0	3.025	0.4375	3.4625	9	2	11	14	2	16	6.25	2	2	4	5	3	2	0.705882353	2	3	6	avoided	0	0	0	0	0
2016_02	2016_02_03	2016_02_03_3_1	P_WE	P	WE	90.604	90.604	20.5	90.604	1	1	1.75	50	0	0	1	0	1	0	0	0	1	0	3.025	0.4375	3.4625	9	2	11	14	2	16	6.25	2	2	4	5	3	2	0.705882353	2	3	6	grazed	0	0	0	0	0
2016_02	2016_02_03	2016_02_03_3_2	P_WE	P	WE	90.604	90.604	20.5	90.604	1	1	1.75	50	0	0	1	0	1	0	0	0	1	0	3.025	0.4375	3.4625	9	2	11	14	2	16	6.25	2	2	4	5	3	2	0.705882353	2	3	6	avoided	0	0	0	0	0
2016_02	2016_02_03	2016_02_03_4_1	P_WE	P	WE	90.604	90.604	20.5	90.604	1	1	1.75	50	0	0	1	0	1	0	0	0	1	0	3.025	0.4375	3.4625	9	2	11	14	2	16	6.25	2	2	4	5	3	2	0.705882353	2	3	6	grazed	1	0	0	0	0
2016_02	2016_02_03	2016_02_03_4_2	P_WE	P	WE	90.604	90.604	20.5	90.604	1	1	1.75	50	0	0	1	0	1	0	0	0	1	0	3.025	0.4375	3.4625	9	2	11	14	2	16	6.25	2	2	4	5	3	2	0.705882353	2	3	6	avoided	0	0	0	0	0
2016_02	2016_02_04	2016_02_04_1_1	P_WE	P	WE	90.604	90.604	20.5	90.604	1	1	1.75	50	0	1	1	0	1	0	0	0	0	0	22.5	7.5125	30.0125	10	2	12	14	2	16	6.25	3	1	4	5	2	3	0.909090909	1	1	10	grazed	1	0	0	0	0
2016_02	2016_02_04	2016_02_04_1_2	P_WE	P	WE	90.604	90.604	20.5	90.604	1	1	1.75	50	0	1	1	0	1	0	0	0	0	0	22.5	7.5125	30.0125	10	2	12	14	2	16	6.25	3	1	4	5	2	3	0.909090909	1	1	10	avoided	1	0	0	0	0
2016_02	2016_02_04	2016_02_04_2_1	P_WE	P	WE	90.604	90.604	20.5	90.604	1	1	1.75	50	0	1	1	0	1	0	0	0	0	0	22.5	7.5125	30.0125	10	2	12	14	2	16	6.25	3	1	4	5	2	3	0.909090909	1	1	10	grazed	1	0	0	0	0
2016_02	2016_02_04	2016_02_04_2_2	P_WE	P	WE	90.604	90.604	20.5	90.604	1	1	1.75	50	0	1	1	0	1	0	0	0	0	0	22.5	7.5125	30.0125	10	2	12	14	2	16	6.25	3	1	4	5	2	3	0.909090909	1	1	10	avoided	1	0	0	0	0
2016_02	2016_02_04	2016_02_04_3_1	P_WE	P	WE	90.604	90.604	20.5	90.604	1	1	1.75	50	0	1	1	0	1	0	0	0	0	0	22.5	7.5125	30.0125	10	2	12	14	2	16	6.25	3	1	4	5	2	3	0.909090909	1	1	10	grazed	0	0	0	0	0
2016_02	2016_02_04	2016_02_04_3_2	P_WE	P	WE	90.604	90.604	20.5	90.604	1	1	1.75	50	0	1	1	0	1	0	0	0	0	0	22.5	7.5125	30.0125	10	2	12	14	2	16	6.25	3	1	4	5	2	3	0.909090909	1	1	10	avoided	1	0	0	0	0
2016_02	2016_02_04	2016_02_04_4_1	P_WE	P	WE	90.604	90.604	20.5	90.604	1	1	1.75	50	0	1	1	0	1	0	0	0	0	0	22.5	7.5125	30.0125	10	2	12	14	2	16	6.25	3	1	4	5	2	3	0.909090909	1	1	10	grazed	1	0	0	0	0
2016_02	2016_02_04	2016_02_04_4_2	P_WE	P	WE	90.604	90.604	20.5	90.604	1	1	1.75	50	0	1	1	0	1	0	0	0	0	0	22.5	7.5125	30.0125	10	2	12	14	2	16	6.25	3	1	4	5	2	3	0.909090909	1	1	10	avoided	1	0	0	0	0
NA	2016_03_01	2016_03_01_1_1	NA	NA	NA	NA	NA	NA	NA	NA	NA	NA	NA	NA	NA	NA	NA	NA	NA	NA	NA	NA	NA	NA	NA	NA	NA	NA	NA	NA	NA	NA	NA	NA	NA	NA	NA	NA	NA	NA	NA	NA	NA	grazed	0	0	0	0	0
NA	2016_03_01	2016_03_01_1_2	NA	NA	NA	NA	NA	NA	NA	NA	NA	NA	NA	NA	NA	NA	NA	NA	NA	NA	NA	NA	NA	NA	NA	NA	NA	NA	NA	NA	NA	NA	NA	NA	NA	NA	NA	NA	NA	NA	NA	NA	NA	avoided	0	0	0	0	0
NA	2016_03_01	2016_03_01_2_1	NA	NA	NA	NA	NA	NA	NA	NA	NA	NA	NA	NA	NA	NA	NA	NA	NA	NA	NA	NA	NA	NA	NA	NA	NA	NA	NA	NA	NA	NA	NA	NA	NA	NA	NA	NA	NA	NA	NA	NA	NA	grazed	0	0	0	0	0
NA	2016_03_01	2016_03_01_2_2	NA	NA	NA	NA	NA	NA	NA	NA	NA	NA	NA	NA	NA	NA	NA	NA	NA	NA	NA	NA	NA	NA	NA	NA	NA	NA	NA	NA	NA	NA	NA	NA	NA	NA	NA	NA	NA	NA	NA	NA	NA	avoided	0	0	0	0	0
NA	2016_03_01	2016_03_01_3_1	NA	NA	NA	NA	NA	NA	NA	NA	NA	NA	NA	NA	NA	NA	NA	NA	NA	NA	NA	NA	NA	NA	NA	NA	NA	NA	NA	NA	NA	NA	NA	NA	NA	NA	NA	NA	NA	NA	NA	NA	NA	grazed	0	0	0	0	0
NA	2016_03_01	2016_03_01_3_2	NA	NA	NA	NA	NA	NA	NA	NA	NA	NA	NA	NA	NA	NA	NA	NA	NA	NA	NA	NA	NA	NA	NA	NA	NA	NA	NA	NA	NA	NA	NA	NA	NA	NA	NA	NA	NA	NA	NA	NA	NA	avoided	0	0	0	0	0
NA	2016_03_01	2016_03_01_4_1	NA	NA	NA	NA	NA	NA	NA	NA	NA	NA	NA	NA	NA	NA	NA	NA	NA	NA	NA	NA	NA	NA	NA	NA	NA	NA	NA	NA	NA	NA	NA	NA	NA	NA	NA	NA	NA	NA	NA	NA	NA	grazed	0	0	0	0	0
NA	2016_03_01	2016_03_01_4_2	NA	NA	NA	NA	NA	NA	NA	NA	NA	NA	NA	NA	NA	NA	NA	NA	NA	NA	NA	NA	NA	NA	NA	NA	NA	NA	NA	NA	NA	NA	NA	NA	NA	NA	NA	NA	NA	NA	NA	NA	NA	avoided	0	0	0	0	0
NA	2016_03_02	2016_03_02_1_1	NA	NA	NA	NA	NA	NA	NA	NA	NA	NA	NA	NA	NA	NA	NA	NA	NA	NA	NA	NA	NA	NA	NA	NA	NA	NA	NA	NA	NA	NA	NA	NA	NA	NA	NA	NA	NA	NA	NA	NA	NA	grazed	0	0	0	0	0
NA	2016_03_02	2016_03_02_1_2	NA	NA	NA	NA	NA	NA	NA	NA	NA	NA	NA	NA	NA	NA	NA	NA	NA	NA	NA	NA	NA	NA	NA	NA	NA	NA	NA	NA	NA	NA	NA	NA	NA	NA	NA	NA	NA	NA	NA	NA	NA	avoided	0	0	0	0	0
NA	2016_03_02	2016_03_02_2_1	NA	NA	NA	NA	NA	NA	NA	NA	NA	NA	NA	NA	NA	NA	NA	NA	NA	NA	NA	NA	NA	NA	NA	NA	NA	NA	NA	NA	NA	NA	NA	NA	NA	NA	NA	NA	NA	NA	NA	NA	NA	grazed	0	0	0	0	0
NA	2016_03_02	2016_03_02_2_2	NA	NA	NA	NA	NA	NA	NA	NA	NA	NA	NA	NA	NA	NA	NA	NA	NA	NA	NA	NA	NA	NA	NA	NA	NA	NA	NA	NA	NA	NA	NA	NA	NA	NA	NA	NA	NA	NA	NA	NA	NA	avoided	0	0	0	0	0
NA	2016_03_02	2016_03_02_3_1	NA	NA	NA	NA	NA	NA	NA	NA	NA	NA	NA	NA	NA	NA	NA	NA	NA	NA	NA	NA	NA	NA	NA	NA	NA	NA	NA	NA	NA	NA	NA	NA	NA	NA	NA	NA	NA	NA	NA	NA	NA	grazed	0	0	0	0	0
NA	2016_03_02	2016_03_02_3_2	NA	NA	NA	NA	NA	NA	NA	NA	NA	NA	NA	NA	NA	NA	NA	NA	NA	NA	NA	NA	NA	NA	NA	NA	NA	NA	NA	NA	NA	NA	NA	NA	NA	NA	NA	NA	NA	NA	NA	NA	NA	avoided	0	0	0	0	0
NA	2016_03_02	2016_03_02_4_1	NA	NA	NA	NA	NA	NA	NA	NA	NA	NA	NA	NA	NA	NA	NA	NA	NA	NA	NA	NA	NA	NA	NA	NA	NA	NA	NA	NA	NA	NA	NA	NA	NA	NA	NA	NA	NA	NA	NA	NA	NA	grazed	0	0	0	0	0
NA	2016_03_02	2016_03_02_4_2	NA	NA	NA	NA	NA	NA	NA	NA	NA	NA	NA	NA	NA	NA	NA	NA	NA	NA	NA	NA	NA	NA	NA	NA	NA	NA	NA	NA	NA	NA	NA	NA	NA	NA	NA	NA	NA	NA	NA	NA	NA	avoided	0	0	0	0	0
2016_03	2016_03_03	2016_03_03_1_1	FWE	F	WE	12	12	42	12	1	1	3	0	0	1	1	0	1	0	0	0	1	0	17.125	9.375	26.5	4	2	6	10	3	13	6.75	0	2	2	5	1	4	0.666666667	2	1	3	grazed	0	0	0	0	0
2016_03	2016_03_03	2016_03_03_1_2	FWE	F	WE	12	12	42	12	1	1	3	0	0	1	1	0	1	0	0	0	1	0	17.125	9.375	26.5	4	2	6	10	3	13	6.75	0	2	2	5	1	4	0.666666667	2	1	3	avoided	0	0	0	0	0
2016_03	2016_03_03	2016_03_03_2_1	FWE	F	WE	12	12	42	12	1	1	3	0	0	1	1	0	1	0	0	0	1	0	17.125	9.375	26.5	4	2	6	10	3	13	6.75	0	2	2	5	1	4	0.666666667	2	1	3	grazed	0	0	0	0	0
2016_03	2016_03_03	2016_03_03_2_2	FWE	F	WE	12	12	42	12	1	1	3	0	0	1	1	0	1	0	0	0	1	0	17.125	9.375	26.5	4	2	6	10	3	13	6.75	0	2	2	5	1	4	0.666666667	2	1	3	avoided	0	0	0	0	0
2016_03	2016_03_03	2016_03_03_3_1	FWE	F	WE	12	12	42	12	1	1	3	0	0	1	1	0	1	0	0	0	1	0	17.125	9.375	26.5	4	2	6	10	3	13	6.75	0	2	2	5	1	4	0.666666667	2	1	3	grazed	0	0	0	0	0
2016_03	2016_03_03	2016_03_03_3_2	FWE	F	WE	12	12	42	12	1	1	3	0	0	1	1	0	1	0	0	0	1	0	17.125	9.375	26.5	4	2	6	10	3	13	6.75	0	2	2	5	1	4	0.666666667	2	1	3	avoided	0	0	0	0	0
2016_03	2016_03_03	2016_03_03_4_1	FWE	F	WE	12	12	42	12	1	1	3	0	0	1	1	0	1	0	0	0	1	0	17.125	9.375	26.5	4	2	6	10	3	13	6.75	0	2	2	5	1	4	0.666666667	2	1	3	grazed	0	0	0	0	0
2016_03	2016_03_03	2016_03_03_4_2	FWE	F	WE	12	12	42	12	1	1	3	0	0	1	1	0	1	0	0	0	1	0	17.125	9.375	26.5	4	2	6	10	3	13	6.75	0	2	2	5	1	4	0.666666667	2	1	3	avoided	0	0	0	0	0
2016_03	2016_03_04	2016_03_04_1_1	FWE	F	WE	12	12	42	12	1	1	3	0	0	1	1	0	1	0	0	0	1	0	19.625	11.25	30.875	7	2	9	10	3	13	6.75	0	2	2	5	5	0	0.5	3	3	3	grazed	0	0	0	0	0
2016_03	2016_03_04	2016_03_04_1_2	FWE	F	WE	12	12	42	12	1	1	3	0	0	1	1	0	1	0	0	0	1	0	19.625	11.25	30.875	7	2	9	10	3	13	6.75	0	2	2	5	5	0	0.5	3	3	3	avoided	0	0	0	0	0
2016_03	2016_03_04	2016_03_04_2_1	FWE	F	WE	12	12	42	12	1	1	3	0	0	1	1	0	1	0	0	0	1	0	19.625	11.25	30.875	7	2	9	10	3	13	6.75	0	2	2	5	5	0	0.5	3	3	3	grazed	0	0	0	0	0
2016_03	2016_03_04	2016_03_04_2_2	FWE	F	WE	12	12	42	12	1	1	3	0	0	1	1	0	1	0	0	0	1	0	19.625	11.25	30.875	7	2	9	10	3	13	6.75	0	2	2	5	5	0	0.5	3	3	3	avoided	0	0	0	0	0
2016_03	2016_03_04	2016_03_04_3_1	FWE	F	WE	12	12	42	12	1	1	3	0	0	1	1	0	1	0	0	0	1	0	19.625	11.25	30.875	7	2	9	10	3	13	6.75	0	2	2	5	5	0	0.5	3	3	3	grazed	0	0	0	0	0
2016_03	2016_03_04	2016_03_04_3_2	FWE	F	WE	12	12	42	12	1	1	3	0	0	1	1	0	1	0	0	0	1	0	19.625	11.25	30.875	7	2	9	10	3	13	6.75	0	2	2	5	5	0	0.5	3	3	3	avoided	0	0	0	0	0
2016_03	2016_03_04	2016_03_04_4_1	FWE	F	WE	12	12	42	12	1	1	3	0	0	1	1	0	1	0	0	0	1	0	19.625	11.25	30.875	7	2	9	10	3	13	6.75	0	2	2	5	5	0	0.5	3	3	3	grazed	0	0	0	0	0
2016_03	2016_03_04	2016_03_04_4_2	FWE	F	WE	12	12	42	12	1	1	3	0	0	1	1	0	1	0	0	0	1	0	19.625	11.25	30.875	7	2	9	10	3	13	6.75	0	2	2	5	5	0	0.5	3	3	3	avoided	0	0	0	0	0
NA	2016_04_01	2016_04_01_1_1	NA	NA	NA	NA	NA	NA	NA	NA	NA	NA	NA	NA	NA	NA	NA	NA	NA	NA	NA	NA	NA	NA	NA	NA	NA	NA	NA	NA	NA	NA	NA	NA	NA	NA	NA	NA	NA	NA	NA	NA	NA	grazed	0	0	0	0	0
NA	2016_04_01	2016_04_01_1_2	NA	NA	NA	NA	NA	NA	NA	NA	NA	NA	NA	NA	NA	NA	NA	NA	NA	NA	NA	NA	NA	NA	NA	NA	NA	NA	NA	NA	NA	NA	NA	NA	NA	NA	NA	NA	NA	NA	NA	NA	NA	avoided	0	0	0	0	0
NA	2016_04_01	2016_04_01_2_1	NA	NA	NA	NA	NA	NA	NA	NA	NA	NA	NA	NA	NA	NA	NA	NA	NA	NA	NA	NA	NA	NA	NA	NA	NA	NA	NA	NA	NA	NA	NA	NA	NA	NA	NA	NA	NA	NA	NA	NA	NA	grazed	0	0	0	0	0
NA	2016_04_01	2016_04_01_2_2	NA	NA	NA	NA	NA	NA	NA	NA	NA	NA	NA	NA	NA	NA	NA	NA	NA	NA	NA	NA	NA	NA	NA	NA	NA	NA	NA	NA	NA	NA	NA	NA	NA	NA	NA	NA	NA	NA	NA	NA	NA	avoided	0	0	0	0	0
NA	2016_04_01	2016_04_01_3_1	NA	NA	NA	NA	NA	NA	NA	NA	NA	NA	NA	NA	NA	NA	NA	NA	NA	NA	NA	NA	NA	NA	NA	NA	NA	NA	NA	NA	NA	NA	NA	NA	NA	NA	NA	NA	NA	NA	NA	NA	NA	grazed	0	0	0	0	0
NA	2016_04_01	2016_04_01_3_2	NA	NA	NA	NA	NA	NA	NA	NA	NA	NA	NA	NA	NA	NA	NA	NA	NA	NA	NA	NA	NA	NA	NA	NA	NA	NA	NA	NA	NA	NA	NA	NA	NA	NA	NA	NA	NA	NA	NA	NA	NA	avoided	0	0	0	0	0
NA	2016_04_01	2016_04_01_4_1	NA	NA	NA	NA	NA	NA	NA	NA	NA	NA	NA	NA	NA	NA	NA	NA	NA	NA	NA	NA	NA	NA	NA	NA	NA	NA	NA	NA	NA	NA	NA	NA	NA	NA	NA	NA	NA	NA	NA	NA	NA	grazed	0	0	0	0	0
NA	2016_04_01	2016_04_01_4_2	NA	NA	NA	NA	NA	NA	NA	NA	NA	NA	NA	NA	NA	NA	NA	NA	NA	NA	NA	NA	NA	NA	NA	NA	NA	NA	NA	NA	NA	NA	NA	NA	NA	NA	NA	NA	NA	NA	NA	NA	NA	avoided	1	0	0	0	0
2016_04	2016_04_02	2016_04_02_1_1	FWE	F	WE	21.7	21.7	24.1	21.7	1	1	2	0	0	1	1	0	1	0	0	0	1	0	2.125	0	2.125	8	1	9	14	3	17	7.25	0	1	1	5	2	3	0.714285714	1	3	5	grazed	0	0	0	0	0
2016_04	2016_04_02	2016_04_02_1_2	FWE	F	WE	21.7	21.7	24.1	21.7	1	1	2	0	0	1	1	0	1	0	0	0	1	0	2.125	0	2.125	8	1	9	14	3	17	7.25	0	1	1	5	2	3	0.714285714	1	3	5	avoided	1	0	0	0	0
2016_04	2016_04_02	2016_04_02_2_1	FWE	F	WE	21.7	21.7	24.1	21.7	1	1	2	0	0	1	1	0	1	0	0	0	1	0	2.125	0	2.125	8	1	9	14	3	17	7.25	0	1	1	5	2	3	0.714285714	1	3	5	grazed	0	0	0	0	0
2016_04	2016_04_02	2016_04_02_2_2	FWE	F	WE	21.7	21.7	24.1	21.7	1	1	2	0	0	1	1	0	1	0	0	0	1	0	2.125	0	2.125	8	1	9	14	3	17	7.25	0	1	1	5	2	3	0.714285714	1	3	5	avoided	0	0	0	0	0
2016_04	2016_04_02	2016_04_02_3_1	FWE	F	WE	21.7	21.7	24.1	21.7	1	1	2	0	0	1	1	0	1	0	0	0	1	0	2.125	0	2.125	8	1	9	14	3	17	7.25	0	1	1	5	2	3	0.714285714	1	3	5	grazed	1	0	0	0	0
2016_04	2016_04_02	2016_04_02_3_2	FWE	F	WE	21.7	21.7	24.1	21.7	1	1	2	0	0	1	1	0	1	0	0	0	1	0	2.125	0	2.125	8	1	9	14	3	17	7.25	0	1	1	5	2	3	0.714285714	1	3	5	avoided	1	0	0	0	0
2016_04	2016_04_02	2016_04_02_4_1	FWE	F	WE	21.7	21.7	24.1	21.7	1	1	2	0	0	1	1	0	1	0	0	0	1	0	2.125	0	2.125	8	1	9	14	3	17	7.25	0	1	1	5	2	3	0.714285714	1	3	5	grazed	0	0	0	0	0
2016_04	2016_04_02	2016_04_02_4_2	FWE	F	WE	21.7	21.7	24.1	21.7	1	1	2	0	0	1	1	0	1	0	0	0	1	0	2.125	0	2.125	8	1	9	14	3	17	7.25	0	1	1	5	2	3	0.714285714	1	3	5	avoided	0	0	0	0	0
NA	2016_04_03	2016_04_03_1_1	NA	NA	NA	NA	NA	NA	NA	NA	NA	NA	NA	NA	NA	NA	NA	NA	NA	NA	NA	NA	NA	NA	NA	NA	NA	NA	NA	NA	NA	NA	NA	NA	NA	NA	NA	NA	NA	NA	NA	NA	NA	grazed	0	0	0	0	0
NA	2016_04_03	2016_04_03_1_2	NA	NA	NA	NA	NA	NA	NA	NA	NA	NA	NA	NA	NA	NA	NA	NA	NA	NA	NA	NA	NA	NA	NA	NA	NA	NA	NA	NA	NA	NA	NA	NA	NA	NA	NA	NA	NA	NA	NA	NA	NA	avoided	0	0	0	0	0
NA	2016_04_03	2016_04_03_2_1	NA	NA	NA	NA	NA	NA	NA	NA	NA	NA	NA	NA	NA	NA	NA	NA	NA	NA	NA	NA	NA	NA	NA	NA	NA	NA	NA	NA	NA	NA	NA	NA	NA	NA	NA	NA	NA	NA	NA	NA	NA	grazed	0	0	0	0	0
NA	2016_04_03	2016_04_03_2_2	NA	NA	NA	NA	NA	NA	NA	NA	NA	NA	NA	NA	NA	NA	NA	NA	NA	NA	NA	NA	NA	NA	NA	NA	NA	NA	NA	NA	NA	NA	NA	NA	NA	NA	NA	NA	NA	NA	NA	NA	NA	avoided	0	0	0	0	0
NA	2016_04_03	2016_04_03_3_1	NA	NA	NA	NA	NA	NA	NA	NA	NA	NA	NA	NA	NA	NA	NA	NA	NA	NA	NA	NA	NA	NA	NA	NA	NA	NA	NA	NA	NA	NA	NA	NA	NA	NA	NA	NA	NA	NA	NA	NA	NA	grazed	0	0	0	0	0
NA	2016_04_03	2016_04_03_3_2	NA	NA	NA	NA	NA	NA	NA	NA	NA	NA	NA	NA	NA	NA	NA	NA	NA	NA	NA	NA	NA	NA	NA	NA	NA	NA	NA	NA	NA	NA	NA	NA	NA	NA	NA	NA	NA	NA	NA	NA	NA	avoided	0	0	0	0	0
NA	2016_04_03	2016_04_03_4_1	NA	NA	NA	NA	NA	NA	NA	NA	NA	NA	NA	NA	NA	NA	NA	NA	NA	NA	NA	NA	NA	NA	NA	NA	NA	NA	NA	NA	NA	NA	NA	NA	NA	NA	NA	NA	NA	NA	NA	NA	NA	grazed	0	0	0	0	0
NA	2016_04_03	2016_04_03_4_2	NA	NA	NA	NA	NA	NA	NA	NA	NA	NA	NA	NA	NA	NA	NA	NA	NA	NA	NA	NA	NA	NA	NA	NA	NA	NA	NA	NA	NA	NA	NA	NA	NA	NA	NA	NA	NA	NA	NA	NA	NA	avoided	0	0	0	0	0
2016_04	2016_04_04	2016_04_04_1_1	FWE	F	WE	21.7	21.7	24.1	21.7	1	1	2	0	0	1	1	0	1	0	0	0	1	1	1.625	0	1.625	10	3	13	14	3	17	7.25	0	1	1	5	4	1	0.266666667	5	6	2	grazed	0	0	0	0	0
2016_04	2016_04_04	2016_04_04_1_2	FWE	F	WE	21.7	21.7	24.1	21.7	1	1	2	0	0	1	1	0	1	0	0	0	1	1	1.625	0	1.625	10	3	13	14	3	17	7.25	0	1	1	5	4	1	0.266666667	5	6	2	avoided	1	0	0	0	0
2016_04	2016_04_04	2016_04_04_2_1	FWE	F	WE	21.7	21.7	24.1	21.7	1	1	2	0	0	1	1	0	1	0	0	0	1	1	1.625	0	1.625	10	3	13	14	3	17	7.25	0	1	1	5	4	1	0.266666667	5	6	2	grazed	0	0	0	0	0
2016_04	2016_04_04	2016_04_04_2_2	FWE	F	WE	21.7	21.7	24.1	21.7	1	1	2	0	0	1	1	0	1	0	0	0	1	1	1.625	0	1.625	10	3	13	14	3	17	7.25	0	1	1	5	4	1	0.266666667	5	6	2	avoided	1	0	0	0	0
2016_04	2016_04_04	2016_04_04_3_1	FWE	F	WE	21.7	21.7	24.1	21.7	1	1	2	0	0	1	1	0	1	0	0	0	1	1	1.625	0	1.625	10	3	13	14	3	17	7.25	0	1	1	5	4	1	0.266666667	5	6	2	grazed	0	0	0	0	0
2016_04	2016_04_04	2016_04_04_3_2	FWE	F	WE	21.7	21.7	24.1	21.7	1	1	2	0	0	1	1	0	1	0	0	0	1	1	1.625	0	1.625	10	3	13	14	3	17	7.25	0	1	1	5	4	1	0.266666667	5	6	2	avoided	0	0	0	0	0
2016_04	2016_04_04	2016_04_04_4_1	FWE	F	WE	21.7	21.7	24.1	21.7	1	1	2	0	0	1	1	0	1	0	0	0	1	1	1.625	0	1.625	10	3	13	14	3	17	7.25	0	1	1	5	4	1	0.266666667	5	6	2	grazed	0	0	0	0	0
2016_04	2016_04_04	2016_04_04_4_2	FWE	F	WE	21.7	21.7	24.1	21.7	1	1	2	0	0	1	1	0	1	0	0	0	1	1	1.625	0	1.625	10	3	13	14	3	17	7.25	0	1	1	5	4	1	0.266666667	5	6	2	avoided	1	0	0	0	0
2016_06	2016_06_01	2016_06_01_1_1	P_WE	P	WE	6	3	12.4	3	0.5	0.5	1	0	1	0	1	0	1	1	0	0	0	1	7.5	7.5	15	2	1	3	6	1	7	4	0	0	0	1	0	1	0.5	1	1	1	grazed	0	0	0	0	0
2016_06	2016_06_01	2016_06_01_1_2	P_WE	P	WE	6	3	12.4	3	0.5	0.5	1	0	1	0	1	0	1	1	0	0	0	1	7.5	7.5	15	2	1	3	6	1	7	4	0	0	0	1	0	1	0.5	1	1	1	avoided	0	0	0	0	0
2016_06	2016_06_01	2016_06_01_2_1	P_WE	P	WE	6	3	12.4	3	0.5	0.5	1	0	1	0	1	0	1	1	0	0	0	1	7.5	7.5	15	2	1	3	6	1	7	4	0	0	0	1	0	1	0.5	1	1	1	grazed	0	0	0	0	0
2016_06	2016_06_01	2016_06_01_2_2	P_WE	P	WE	6	3	12.4	3	0.5	0.5	1	0	1	0	1	0	1	1	0	0	0	1	7.5	7.5	15	2	1	3	6	1	7	4	0	0	0	1	0	1	0.5	1	1	1	avoided	0	0	0	0	0
2016_06	2016_06_01	2016_06_01_3_1	P_WE	P	WE	6	3	12.4	3	0.5	0.5	1	0	1	0	1	0	1	1	0	0	0	1	7.5	7.5	15	2	1	3	6	1	7	4	0	0	0	1	0	1	0.5	1	1	1	grazed	0	0	0	0	0
2016_06	2016_06_01	2016_06_01_3_2	P_WE	P	WE	6	3	12.4	3	0.5	0.5	1	0	1	0	1	0	1	1	0	0	0	1	7.5	7.5	15	2	1	3	6	1	7	4	0	0	0	1	0	1	0.5	1	1	1	avoided	0	0	0	0	0
2016_06	2016_06_01	2016_06_01_4_1	P_WE	P	WE	6	3	12.4	3	0.5	0.5	1	0	1	0	1	0	1	1	0	0	0	1	7.5	7.5	15	2	1	3	6	1	7	4	0	0	0	1	0	1	0.5	1	1	1	grazed	0	0	0	0	0
2016_06	2016_06_01	2016_06_01_4_2	P_WE	P	WE	6	3	12.4	3	0.5	0.5	1	0	1	0	1	0	1	1	0	0	0	1	7.5	7.5	15	2	1	3	6	1	7	4	0	0	0	1	0	1	0.5	1	1	1	avoided	0	0	0	0	0
NA	2016_06_02	2016_06_02_1_1	NA	NA	NA	NA	NA	NA	NA	NA	NA	NA	NA	NA	NA	NA	NA	NA	NA	NA	NA	NA	NA	NA	NA	NA	NA	NA	NA	NA	NA	NA	NA	NA	NA	NA	NA	NA	NA	NA	NA	NA	NA	grazed	0	0	0	0	0
NA	2016_06_02	2016_06_02_1_2	NA	NA	NA	NA	NA	NA	NA	NA	NA	NA	NA	NA	NA	NA	NA	NA	NA	NA	NA	NA	NA	NA	NA	NA	NA	NA	NA	NA	NA	NA	NA	NA	NA	NA	NA	NA	NA	NA	NA	NA	NA	avoided	0	0	0	0	0
NA	2016_06_02	2016_06_02_2_1	NA	NA	NA	NA	NA	NA	NA	NA	NA	NA	NA	NA	NA	NA	NA	NA	NA	NA	NA	NA	NA	NA	NA	NA	NA	NA	NA	NA	NA	NA	NA	NA	NA	NA	NA	NA	NA	NA	NA	NA	NA	grazed	0	0	0	0	0
NA	2016_06_02	2016_06_02_2_2	NA	NA	NA	NA	NA	NA	NA	NA	NA	NA	NA	NA	NA	NA	NA	NA	NA	NA	NA	NA	NA	NA	NA	NA	NA	NA	NA	NA	NA	NA	NA	NA	NA	NA	NA	NA	NA	NA	NA	NA	NA	avoided	0	0	0	0	0
NA	2016_06_02	2016_06_02_3_1	NA	NA	NA	NA	NA	NA	NA	NA	NA	NA	NA	NA	NA	NA	NA	NA	NA	NA	NA	NA	NA	NA	NA	NA	NA	NA	NA	NA	NA	NA	NA	NA	NA	NA	NA	NA	NA	NA	NA	NA	NA	grazed	0	0	0	0	0
NA	2016_06_02	2016_06_02_3_2	NA	NA	NA	NA	NA	NA	NA	NA	NA	NA	NA	NA	NA	NA	NA	NA	NA	NA	NA	NA	NA	NA	NA	NA	NA	NA	NA	NA	NA	NA	NA	NA	NA	NA	NA	NA	NA	NA	NA	NA	NA	avoided	0	0	0	0	0
NA	2016_06_02	2016_06_02_4_1	NA	NA	NA	NA	NA	NA	NA	NA	NA	NA	NA	NA	NA	NA	NA	NA	NA	NA	NA	NA	NA	NA	NA	NA	NA	NA	NA	NA	NA	NA	NA	NA	NA	NA	NA	NA	NA	NA	NA	NA	NA	grazed	0	0	0	0	0
NA	2016_06_02	2016_06_02_4_2	NA	NA	NA	NA	NA	NA	NA	NA	NA	NA	NA	NA	NA	NA	NA	NA	NA	NA	NA	NA	NA	NA	NA	NA	NA	NA	NA	NA	NA	NA	NA	NA	NA	NA	NA	NA	NA	NA	NA	NA	NA	avoided	0	0	0	0	0
NA	2016_06_03	2016_06_03_1_1	NA	NA	NA	NA	NA	NA	NA	NA	NA	NA	NA	NA	NA	NA	NA	NA	NA	NA	NA	NA	NA	NA	NA	NA	NA	NA	NA	NA	NA	NA	NA	NA	NA	NA	NA	NA	NA	NA	NA	NA	NA	grazed	0	0	0	0	0
NA	2016_06_03	2016_06_03_1_2	NA	NA	NA	NA	NA	NA	NA	NA	NA	NA	NA	NA	NA	NA	NA	NA	NA	NA	NA	NA	NA	NA	NA	NA	NA	NA	NA	NA	NA	NA	NA	NA	NA	NA	NA	NA	NA	NA	NA	NA	NA	avoided	0	0	0	0	0
NA	2016_06_03	2016_06_03_2_1	NA	NA	NA	NA	NA	NA	NA	NA	NA	NA	NA	NA	NA	NA	NA	NA	NA	NA	NA	NA	NA	NA	NA	NA	NA	NA	NA	NA	NA	NA	NA	NA	NA	NA	NA	NA	NA	NA	NA	NA	NA	grazed	0	0	0	0	0
NA	2016_06_03	2016_06_03_2_2	NA	NA	NA	NA	NA	NA	NA	NA	NA	NA	NA	NA	NA	NA	NA	NA	NA	NA	NA	NA	NA	NA	NA	NA	NA	NA	NA	NA	NA	NA	NA	NA	NA	NA	NA	NA	NA	NA	NA	NA	NA	avoided	0	0	0	0	0
NA	2016_06_03	2016_06_03_3_1	NA	NA	NA	NA	NA	NA	NA	NA	NA	NA	NA	NA	NA	NA	NA	NA	NA	NA	NA	NA	NA	NA	NA	NA	NA	NA	NA	NA	NA	NA	NA	NA	NA	NA	NA	NA	NA	NA	NA	NA	NA	grazed	0	0	0	0	0
NA	2016_06_03	2016_06_03_3_2	NA	NA	NA	NA	NA	NA	NA	NA	NA	NA	NA	NA	NA	NA	NA	NA	NA	NA	NA	NA	NA	NA	NA	NA	NA	NA	NA	NA	NA	NA	NA	NA	NA	NA	NA	NA	NA	NA	NA	NA	NA	avoided	0	0	0	0	0
NA	2016_06_03	2016_06_03_4_1	NA	NA	NA	NA	NA	NA	NA	NA	NA	NA	NA	NA	NA	NA	NA	NA	NA	NA	NA	NA	NA	NA	NA	NA	NA	NA	NA	NA	NA	NA	NA	NA	NA	NA	NA	NA	NA	NA	NA	NA	NA	grazed	0	0	0	0	0
NA	2016_06_03	2016_06_03_4_2	NA	NA	NA	NA	NA	NA	NA	NA	NA	NA	NA	NA	NA	NA	NA	NA	NA	NA	NA	NA	NA	NA	NA	NA	NA	NA	NA	NA	NA	NA	NA	NA	NA	NA	NA	NA	NA	NA	NA	NA	NA	avoided	0	0	0	0	0
NA	2016_06_04	2016_06_04_1_1	NA	NA	NA	NA	NA	NA	NA	NA	NA	NA	NA	NA	NA	NA	NA	NA	NA	NA	NA	NA	NA	NA	NA	NA	NA	NA	NA	NA	NA	NA	NA	NA	NA	NA	NA	NA	NA	NA	NA	NA	NA	grazed	0	0	0	0	0
NA	2016_06_04	2016_06_04_1_2	NA	NA	NA	NA	NA	NA	NA	NA	NA	NA	NA	NA	NA	NA	NA	NA	NA	NA	NA	NA	NA	NA	NA	NA	NA	NA	NA	NA	NA	NA	NA	NA	NA	NA	NA	NA	NA	NA	NA	NA	NA	avoided	0	0	0	0	0
NA	2016_06_04	2016_06_04_2_1	NA	NA	NA	NA	NA	NA	NA	NA	NA	NA	NA	NA	NA	NA	NA	NA	NA	NA	NA	NA	NA	NA	NA	NA	NA	NA	NA	NA	NA	NA	NA	NA	NA	NA	NA	NA	NA	NA	NA	NA	NA	grazed	0	0	0	0	0
NA	2016_06_04	2016_06_04_2_2	NA	NA	NA	NA	NA	NA	NA	NA	NA	NA	NA	NA	NA	NA	NA	NA	NA	NA	NA	NA	NA	NA	NA	NA	NA	NA	NA	NA	NA	NA	NA	NA	NA	NA	NA	NA	NA	NA	NA	NA	NA	avoided	0	0	0	0	0
NA	2016_06_04	2016_06_04_3_1	NA	NA	NA	NA	NA	NA	NA	NA	NA	NA	NA	NA	NA	NA	NA	NA	NA	NA	NA	NA	NA	NA	NA	NA	NA	NA	NA	NA	NA	NA	NA	NA	NA	NA	NA	NA	NA	NA	NA	NA	NA	grazed	0	0	0	0	0
NA	2016_06_04	2016_06_04_3_2	NA	NA	NA	NA	NA	NA	NA	NA	NA	NA	NA	NA	NA	NA	NA	NA	NA	NA	NA	NA	NA	NA	NA	NA	NA	NA	NA	NA	NA	NA	NA	NA	NA	NA	NA	NA	NA	NA	NA	NA	NA	avoided	0	0	0	0	0
NA	2016_06_04	2016_06_04_4_1	NA	NA	NA	NA	NA	NA	NA	NA	NA	NA	NA	NA	NA	NA	NA	NA	NA	NA	NA	NA	NA	NA	NA	NA	NA	NA	NA	NA	NA	NA	NA	NA	NA	NA	NA	NA	NA	NA	NA	NA	NA	grazed	0	0	0	0	0
NA	2016_06_04	2016_06_04_4_2	NA	NA	NA	NA	NA	NA	NA	NA	NA	NA	NA	NA	NA	NA	NA	NA	NA	NA	NA	NA	NA	NA	NA	NA	NA	NA	NA	NA	NA	NA	NA	NA	NA	NA	NA	NA	NA	NA	NA	NA	NA	avoided	0	0	0	0	0
2016_07	2016_07_01	2016_07_01_1_1	FE	F	E	190	45	50	15	0.236842105	0.078947368	3	0	0	1	1	0	1	1	0	0	1	0	19.25	3.25	22.5	9	1	10	14	1	15	6.75	1	0	1	5	2	3	0.571428571	2	4	4	grazed	0	0	0	0	0
2016_07	2016_07_01	2016_07_01_1_2	FE	F	E	190	45	50	15	0.236842105	0.078947368	3	0	0	1	1	0	1	1	0	0	1	0	19.25	3.25	22.5	9	1	10	14	1	15	6.75	1	0	1	5	2	3	0.571428571	2	4	4	avoided	0	0	0	0	0
2016_07	2016_07_01	2016_07_01_2_1	FE	F	E	190	45	50	15	0.236842105	0.078947368	3	0	0	1	1	0	1	1	0	0	1	0	19.25	3.25	22.5	9	1	10	14	1	15	6.75	1	0	1	5	2	3	0.571428571	2	4	4	grazed	0	0	0	0	0
2016_07	2016_07_01	2016_07_01_2_2	FE	F	E	190	45	50	15	0.236842105	0.078947368	3	0	0	1	1	0	1	1	0	0	1	0	19.25	3.25	22.5	9	1	10	14	1	15	6.75	1	0	1	5	2	3	0.571428571	2	4	4	avoided	0	0	0	0	0
2016_07	2016_07_01	2016_07_01_3_1	FE	F	E	190	45	50	15	0.236842105	0.078947368	3	0	0	1	1	0	1	1	0	0	1	0	19.25	3.25	22.5	9	1	10	14	1	15	6.75	1	0	1	5	2	3	0.571428571	2	4	4	grazed	1	0	0	0	0
2016_07	2016_07_01	2016_07_01_3_2	FE	F	E	190	45	50	15	0.236842105	0.078947368	3	0	0	1	1	0	1	1	0	0	1	0	19.25	3.25	22.5	9	1	10	14	1	15	6.75	1	0	1	5	2	3	0.571428571	2	4	4	avoided	0	0	0	0	0
2016_07	2016_07_01	2016_07_01_4_1	FE	F	E	190	45	50	15	0.236842105	0.078947368	3	0	0	1	1	0	1	1	0	0	1	0	19.25	3.25	22.5	9	1	10	14	1	15	6.75	1	0	1	5	2	3	0.571428571	2	4	4	grazed	0	0	0	0	0
2016_07	2016_07_01	2016_07_01_4_2	FE	F	E	190	45	50	15	0.236842105	0.078947368	3	0	0	1	1	0	1	1	0	0	1	0	19.25	3.25	22.5	9	1	10	14	1	15	6.75	1	0	1	5	2	3	0.571428571	2	4	4	avoided	0	0	0	0	0
2016_07	2016_07_02	2016_07_02_1_1	FE	F	E	190	45	50	15	0.236842105	0.078947368	3	0	0	1	1	0	1	1	0	0	1	0	21.875	3.75	25.625	9	1	10	14	1	15	6.75	1	0	1	5	2	3	0.75	1	3	6	grazed	0	0	0	0	0
2016_07	2016_07_02	2016_07_02_1_2	FE	F	E	190	45	50	15	0.236842105	0.078947368	3	0	0	1	1	0	1	1	0	0	1	0	21.875	3.75	25.625	9	1	10	14	1	15	6.75	1	0	1	5	2	3	0.75	1	3	6	avoided	0	0	0	0	0
2016_07	2016_07_02	2016_07_02_2_1	FE	F	E	190	45	50	15	0.236842105	0.078947368	3	0	0	1	1	0	1	1	0	0	1	0	21.875	3.75	25.625	9	1	10	14	1	15	6.75	1	0	1	5	2	3	0.75	1	3	6	grazed	0	0	0	0	0
2016_07	2016_07_02	2016_07_02_2_2	FE	F	E	190	45	50	15	0.236842105	0.078947368	3	0	0	1	1	0	1	1	0	0	1	0	21.875	3.75	25.625	9	1	10	14	1	15	6.75	1	0	1	5	2	3	0.75	1	3	6	avoided	0	0	0	0	0
2016_07	2016_07_02	2016_07_02_3_1	FE	F	E	190	45	50	15	0.236842105	0.078947368	3	0	0	1	1	0	1	1	0	0	1	0	21.875	3.75	25.625	9	1	10	14	1	15	6.75	1	0	1	5	2	3	0.75	1	3	6	grazed	1	0	0	0	0
2016_07	2016_07_02	2016_07_02_3_2	FE	F	E	190	45	50	15	0.236842105	0.078947368	3	0	0	1	1	0	1	1	0	0	1	0	21.875	3.75	25.625	9	1	10	14	1	15	6.75	1	0	1	5	2	3	0.75	1	3	6	avoided	1	0	0	0	0
2016_07	2016_07_02	2016_07_02_4_1	FE	F	E	190	45	50	15	0.236842105	0.078947368	3	0	0	1	1	0	1	1	0	0	1	0	21.875	3.75	25.625	9	1	10	14	1	15	6.75	1	0	1	5	2	3	0.75	1	3	6	grazed	0	0	0	0	0
2016_07	2016_07_02	2016_07_02_4_2	FE	F	E	190	45	50	15	0.236842105	0.078947368	3	0	0	1	1	0	1	1	0	0	1	0	21.875	3.75	25.625	9	1	10	14	1	15	6.75	1	0	1	5	2	3	0.75	1	3	6	avoided	0	0	0	0	0
NA	2016_07_03	2016_07_03_1_1	NA	NA	NA	NA	NA	NA	NA	NA	NA	NA	NA	NA	NA	NA	NA	NA	NA	NA	NA	NA	NA	NA	NA	NA	NA	NA	NA	NA	NA	NA	NA	NA	NA	NA	NA	NA	NA	NA	NA	NA	NA	grazed	0	0	0	0	0
NA	2016_07_03	2016_07_03_1_2	NA	NA	NA	NA	NA	NA	NA	NA	NA	NA	NA	NA	NA	NA	NA	NA	NA	NA	NA	NA	NA	NA	NA	NA	NA	NA	NA	NA	NA	NA	NA	NA	NA	NA	NA	NA	NA	NA	NA	NA	NA	avoided	1	0	0	0	0
NA	2016_07_03	2016_07_03_2_1	NA	NA	NA	NA	NA	NA	NA	NA	NA	NA	NA	NA	NA	NA	NA	NA	NA	NA	NA	NA	NA	NA	NA	NA	NA	NA	NA	NA	NA	NA	NA	NA	NA	NA	NA	NA	NA	NA	NA	NA	NA	grazed	0	0	0	0	0
NA	2016_07_03	2016_07_03_2_2	NA	NA	NA	NA	NA	NA	NA	NA	NA	NA	NA	NA	NA	NA	NA	NA	NA	NA	NA	NA	NA	NA	NA	NA	NA	NA	NA	NA	NA	NA	NA	NA	NA	NA	NA	NA	NA	NA	NA	NA	NA	avoided	0	0	0	0	0
NA	2016_07_03	2016_07_03_3_1	NA	NA	NA	NA	NA	NA	NA	NA	NA	NA	NA	NA	NA	NA	NA	NA	NA	NA	NA	NA	NA	NA	NA	NA	NA	NA	NA	NA	NA	NA	NA	NA	NA	NA	NA	NA	NA	NA	NA	NA	NA	grazed	0	0	0	0	0
NA	2016_07_03	2016_07_03_3_2	NA	NA	NA	NA	NA	NA	NA	NA	NA	NA	NA	NA	NA	NA	NA	NA	NA	NA	NA	NA	NA	NA	NA	NA	NA	NA	NA	NA	NA	NA	NA	NA	NA	NA	NA	NA	NA	NA	NA	NA	NA	avoided	0	0	0	0	0
NA	2016_07_03	2016_07_03_4_1	NA	NA	NA	NA	NA	NA	NA	NA	NA	NA	NA	NA	NA	NA	NA	NA	NA	NA	NA	NA	NA	NA	NA	NA	NA	NA	NA	NA	NA	NA	NA	NA	NA	NA	NA	NA	NA	NA	NA	NA	NA	grazed	0	0	0	0	0
NA	2016_07_03	2016_07_03_4_2	NA	NA	NA	NA	NA	NA	NA	NA	NA	NA	NA	NA	NA	NA	NA	NA	NA	NA	NA	NA	NA	NA	NA	NA	NA	NA	NA	NA	NA	NA	NA	NA	NA	NA	NA	NA	NA	NA	NA	NA	NA	avoided	1	0	0	0	0
2016_07	2016_07_04	2016_07_04_1_1	FE	F	E	190	45	50	15	0.236842105	0.078947368	3	0	1	1	1	0	1	0	0	0	0	1	19.75	10.875	30.625	7	1	8	14	1	15	6.75	0	1	1	5	3	2	0.769230769	1	2	5	grazed	1	0	0	0	0
2016_07	2016_07_04	2016_07_04_1_2	FE	F	E	190	45	50	15	0.236842105	0.078947368	3	0	1	1	1	0	1	0	0	0	0	1	19.75	10.875	30.625	7	1	8	14	1	15	6.75	0	1	1	5	3	2	0.769230769	1	2	5	avoided	1	0	0	0	0
2016_07	2016_07_04	2016_07_04_2_1	FE	F	E	190	45	50	15	0.236842105	0.078947368	3	0	1	1	1	0	1	0	0	0	0	1	19.75	10.875	30.625	7	1	8	14	1	15	6.75	0	1	1	5	3	2	0.769230769	1	2	5	grazed	0	0	0	0	0
2016_07	2016_07_04	2016_07_04_2_2	FE	F	E	190	45	50	15	0.236842105	0.078947368	3	0	1	1	1	0	1	0	0	0	0	1	19.75	10.875	30.625	7	1	8	14	1	15	6.75	0	1	1	5	3	2	0.769230769	1	2	5	avoided	0	0	0	0	0
2016_07	2016_07_04	2016_07_04_3_1	FE	F	E	190	45	50	15	0.236842105	0.078947368	3	0	1	1	1	0	1	0	0	0	0	1	19.75	10.875	30.625	7	1	8	14	1	15	6.75	0	1	1	5	3	2	0.769230769	1	2	5	grazed	0	0	0	0	0
2016_07	2016_07_04	2016_07_04_3_2	FE	F	E	190	45	50	15	0.236842105	0.078947368	3	0	1	1	1	0	1	0	0	0	0	1	19.75	10.875	30.625	7	1	8	14	1	15	6.75	0	1	1	5	3	2	0.769230769	1	2	5	avoided	0	0	0	0	0
2016_07	2016_07_04	2016_07_04_4_1	FE	F	E	190	45	50	15	0.236842105	0.078947368	3	0	1	1	1	0	1	0	0	0	0	1	19.75	10.875	30.625	7	1	8	14	1	15	6.75	0	1	1	5	3	2	0.769230769	1	2	5	grazed	0	0	0	0	0
2016_07	2016_07_04	2016_07_04_4_2	FE	F	E	190	45	50	15	0.236842105	0.078947368	3	0	1	1	1	0	1	0	0	0	0	1	19.75	10.875	30.625	7	1	8	14	1	15	6.75	0	1	1	5	3	2	0.769230769	1	2	5	avoided	0	0	0	0	0
NA	2016_08_01	2016_08_01_1_1	NA	NA	NA	NA	NA	NA	NA	NA	NA	NA	NA	NA	NA	NA	NA	NA	NA	NA	NA	NA	NA	NA	NA	NA	NA	NA	NA	NA	NA	NA	NA	NA	NA	NA	NA	NA	NA	NA	NA	NA	NA	grazed	0	0	0	0	0
NA	2016_08_01	2016_08_01_1_2	NA	NA	NA	NA	NA	NA	NA	NA	NA	NA	NA	NA	NA	NA	NA	NA	NA	NA	NA	NA	NA	NA	NA	NA	NA	NA	NA	NA	NA	NA	NA	NA	NA	NA	NA	NA	NA	NA	NA	NA	NA	avoided	0	0	0	0	0
NA	2016_08_01	2016_08_01_2_1	NA	NA	NA	NA	NA	NA	NA	NA	NA	NA	NA	NA	NA	NA	NA	NA	NA	NA	NA	NA	NA	NA	NA	NA	NA	NA	NA	NA	NA	NA	NA	NA	NA	NA	NA	NA	NA	NA	NA	NA	NA	grazed	0	0	0	0	0
NA	2016_08_01	2016_08_01_2_2	NA	NA	NA	NA	NA	NA	NA	NA	NA	NA	NA	NA	NA	NA	NA	NA	NA	NA	NA	NA	NA	NA	NA	NA	NA	NA	NA	NA	NA	NA	NA	NA	NA	NA	NA	NA	NA	NA	NA	NA	NA	avoided	0	0	0	0	0
NA	2016_08_01	2016_08_01_3_1	NA	NA	NA	NA	NA	NA	NA	NA	NA	NA	NA	NA	NA	NA	NA	NA	NA	NA	NA	NA	NA	NA	NA	NA	NA	NA	NA	NA	NA	NA	NA	NA	NA	NA	NA	NA	NA	NA	NA	NA	NA	grazed	0	0	0	0	0
NA	2016_08_01	2016_08_01_3_2	NA	NA	NA	NA	NA	NA	NA	NA	NA	NA	NA	NA	NA	NA	NA	NA	NA	NA	NA	NA	NA	NA	NA	NA	NA	NA	NA	NA	NA	NA	NA	NA	NA	NA	NA	NA	NA	NA	NA	NA	NA	avoided	0	0	0	0	0
NA	2016_08_01	2016_08_01_4_1	NA	NA	NA	NA	NA	NA	NA	NA	NA	NA	NA	NA	NA	NA	NA	NA	NA	NA	NA	NA	NA	NA	NA	NA	NA	NA	NA	NA	NA	NA	NA	NA	NA	NA	NA	NA	NA	NA	NA	NA	NA	grazed	0	0	0	0	0
NA	2016_08_01	2016_08_01_4_2	NA	NA	NA	NA	NA	NA	NA	NA	NA	NA	NA	NA	NA	NA	NA	NA	NA	NA	NA	NA	NA	NA	NA	NA	NA	NA	NA	NA	NA	NA	NA	NA	NA	NA	NA	NA	NA	NA	NA	NA	NA	avoided	0	0	0	0	0
2016_08	2016_08_02	2016_08_02_1_1	FE	F	E	101	20	47.6	20	0.198019802	0.198019802	2	35	0	1	1	1	1	0	0	1	1	0	8.875	0.375	9.25	7	1	8	10	1	11	6.5	0	0	0	5	4	1	0.222222222	2	5	1	grazed	0	0	0	0	0
2016_08	2016_08_02	2016_08_02_1_2	FE	F	E	101	20	47.6	20	0.198019802	0.198019802	2	35	0	1	1	1	1	0	0	1	1	0	8.875	0.375	9.25	7	1	8	10	1	11	6.5	0	0	0	5	4	1	0.222222222	2	5	1	avoided	0	0	0	0	0
2016_08	2016_08_02	2016_08_02_2_1	FE	F	E	101	20	47.6	20	0.198019802	0.198019802	2	35	0	1	1	1	1	0	0	1	1	0	8.875	0.375	9.25	7	1	8	10	1	11	6.5	0	0	0	5	4	1	0.222222222	2	5	1	grazed	0	0	0	0	0
2016_08	2016_08_02	2016_08_02_2_2	FE	F	E	101	20	47.6	20	0.198019802	0.198019802	2	35	0	1	1	1	1	0	0	1	1	0	8.875	0.375	9.25	7	1	8	10	1	11	6.5	0	0	0	5	4	1	0.222222222	2	5	1	avoided	0	0	0	0	0
2016_08	2016_08_02	2016_08_02_3_1	FE	F	E	101	20	47.6	20	0.198019802	0.198019802	2	35	0	1	1	1	1	0	0	1	1	0	8.875	0.375	9.25	7	1	8	10	1	11	6.5	0	0	0	5	4	1	0.222222222	2	5	1	grazed	0	0	0	0	0
2016_08	2016_08_02	2016_08_02_3_2	FE	F	E	101	20	47.6	20	0.198019802	0.198019802	2	35	0	1	1	1	1	0	0	1	1	0	8.875	0.375	9.25	7	1	8	10	1	11	6.5	0	0	0	5	4	1	0.222222222	2	5	1	avoided	0	0	0	0	0
2016_08	2016_08_02	2016_08_02_4_1	FE	F	E	101	20	47.6	20	0.198019802	0.198019802	2	35	0	1	1	1	1	0	0	1	1	0	8.875	0.375	9.25	7	1	8	10	1	11	6.5	0	0	0	5	4	1	0.222222222	2	5	1	grazed	0	0	0	0	0
2016_08	2016_08_02	2016_08_02_4_2	FE	F	E	101	20	47.6	20	0.198019802	0.198019802	2	35	0	1	1	1	1	0	0	1	1	0	8.875	0.375	9.25	7	1	8	10	1	11	6.5	0	0	0	5	4	1	0.222222222	2	5	1	avoided	0	0	0	0	0
2016_08	2016_08_03	2016_08_03_1_1	FE	F	E	101	20	47.6	20	0.198019802	0.198019802	2	35	0	1	1	1	1	0	0	0	1	1	5.428571429	0	5.428571429	5	0	5	10	1	11	6.5	0	0	0	5	4	1	0.333333333	2	2	1	grazed	0	0	0	0	0
2016_08	2016_08_03	2016_08_03_1_2	FE	F	E	101	20	47.6	20	0.198019802	0.198019802	2	35	0	1	1	1	1	0	0	0	1	1	5.428571429	0	5.428571429	5	0	5	10	1	11	6.5	0	0	0	5	4	1	0.333333333	2	2	1	avoided	0	0	0	0	0
2016_08	2016_08_03	2016_08_03_2_1	FE	F	E	101	20	47.6	20	0.198019802	0.198019802	2	35	0	1	1	1	1	0	0	0	1	1	5.428571429	0	5.428571429	5	0	5	10	1	11	6.5	0	0	0	5	4	1	0.333333333	2	2	1	grazed	0	0	0	0	0
2016_08	2016_08_03	2016_08_03_2_2	FE	F	E	101	20	47.6	20	0.198019802	0.198019802	2	35	0	1	1	1	1	0	0	0	1	1	5.428571429	0	5.428571429	5	0	5	10	1	11	6.5	0	0	0	5	4	1	0.333333333	2	2	1	avoided	0	0	0	0	0
2016_08	2016_08_03	2016_08_03_3_1	FE	F	E	101	20	47.6	20	0.198019802	0.198019802	2	35	0	1	1	1	1	0	0	0	1	1	5.428571429	0	5.428571429	5	0	5	10	1	11	6.5	0	0	0	5	4	1	0.333333333	2	2	1	grazed	0	0	0	0	0
2016_08	2016_08_03	2016_08_03_3_2	FE	F	E	101	20	47.6	20	0.198019802	0.198019802	2	35	0	1	1	1	1	0	0	0	1	1	5.428571429	0	5.428571429	5	0	5	10	1	11	6.5	0	0	0	5	4	1	0.333333333	2	2	1	avoided	0	0	0	0	0
2016_08	2016_08_03	2016_08_03_4_1	FE	F	E	101	20	47.6	20	0.198019802	0.198019802	2	35	0	1	1	1	1	0	0	0	1	1	5.428571429	0	5.428571429	5	0	5	10	1	11	6.5	0	0	0	5	4	1	0.333333333	2	2	1	grazed	0	0	0	0	0
2016_08	2016_08_03	2016_08_03_4_2	FE	F	E	101	20	47.6	20	0.198019802	0.198019802	2	35	0	1	1	1	1	0	0	0	1	1	5.428571429	0	5.428571429	5	0	5	10	1	11	6.5	0	0	0	5	4	1	0.333333333	2	2	1	avoided	0	0	0	0	0
2016_08	2016_08_04	2016_08_04_1_1	FE	F	E	101	20	47.6	20	0.198019802	0.198019802	2	35	0	1	1	1	1	0	0	1	1	1	2.5	0	2.5	3	0	3	10	1	11	6.5	0	0	0	5	1	4	0.5	1	1	1	grazed	0	0	0	0	0
2016_08	2016_08_04	2016_08_04_1_2	FE	F	E	101	20	47.6	20	0.198019802	0.198019802	2	35	0	1	1	1	1	0	0	1	1	1	2.5	0	2.5	3	0	3	10	1	11	6.5	0	0	0	5	1	4	0.5	1	1	1	avoided	0	0	0	0	0
2016_08	2016_08_04	2016_08_04_2_1	FE	F	E	101	20	47.6	20	0.198019802	0.198019802	2	35	0	1	1	1	1	0	0	1	1	1	2.5	0	2.5	3	0	3	10	1	11	6.5	0	0	0	5	1	4	0.5	1	1	1	grazed	0	0	0	0	0
2016_08	2016_08_04	2016_08_04_2_2	FE	F	E	101	20	47.6	20	0.198019802	0.198019802	2	35	0	1	1	1	1	0	0	1	1	1	2.5	0	2.5	3	0	3	10	1	11	6.5	0	0	0	5	1	4	0.5	1	1	1	avoided	0	0	0	0	0
2016_08	2016_08_04	2016_08_04_3_1	FE	F	E	101	20	47.6	20	0.198019802	0.198019802	2	35	0	1	1	1	1	0	0	1	1	1	2.5	0	2.5	3	0	3	10	1	11	6.5	0	0	0	5	1	4	0.5	1	1	1	grazed	0	0	0	0	0
2016_08	2016_08_04	2016_08_04_3_2	FE	F	E	101	20	47.6	20	0.198019802	0.198019802	2	35	0	1	1	1	1	0	0	1	1	1	2.5	0	2.5	3	0	3	10	1	11	6.5	0	0	0	5	1	4	0.5	1	1	1	avoided	0	0	0	0	0
2016_08	2016_08_04	2016_08_04_4_1	FE	F	E	101	20	47.6	20	0.198019802	0.198019802	2	35	0	1	1	1	1	0	0	1	1	1	2.5	0	2.5	3	0	3	10	1	11	6.5	0	0	0	5	1	4	0.5	1	1	1	grazed	0	0	0	0	0
2016_08	2016_08_04	2016_08_04_4_2	FE	F	E	101	20	47.6	20	0.198019802	0.198019802	2	35	0	1	1	1	1	0	0	1	1	1	2.5	0	2.5	3	0	3	10	1	11	6.5	0	0	0	5	1	4	0.5	1	1	1	avoided	0	0	0	0	0
NA	2016_09_01	2016_09_01_1_1	NA	NA	NA	NA	NA	NA	NA	NA	NA	NA	NA	NA	NA	NA	NA	NA	NA	NA	NA	NA	NA	NA	NA	NA	NA	NA	NA	NA	NA	NA	NA	NA	NA	NA	NA	NA	NA	NA	NA	NA	NA	grazed	0	0	0	0	0
NA	2016_09_01	2016_09_01_1_2	NA	NA	NA	NA	NA	NA	NA	NA	NA	NA	NA	NA	NA	NA	NA	NA	NA	NA	NA	NA	NA	NA	NA	NA	NA	NA	NA	NA	NA	NA	NA	NA	NA	NA	NA	NA	NA	NA	NA	NA	NA	avoided	0	0	0	0	0
NA	2016_09_01	2016_09_01_2_1	NA	NA	NA	NA	NA	NA	NA	NA	NA	NA	NA	NA	NA	NA	NA	NA	NA	NA	NA	NA	NA	NA	NA	NA	NA	NA	NA	NA	NA	NA	NA	NA	NA	NA	NA	NA	NA	NA	NA	NA	NA	grazed	0	0	0	0	0
NA	2016_09_01	2016_09_01_2_2	NA	NA	NA	NA	NA	NA	NA	NA	NA	NA	NA	NA	NA	NA	NA	NA	NA	NA	NA	NA	NA	NA	NA	NA	NA	NA	NA	NA	NA	NA	NA	NA	NA	NA	NA	NA	NA	NA	NA	NA	NA	avoided	0	0	0	0	0
NA	2016_09_01	2016_09_01_3_1	NA	NA	NA	NA	NA	NA	NA	NA	NA	NA	NA	NA	NA	NA	NA	NA	NA	NA	NA	NA	NA	NA	NA	NA	NA	NA	NA	NA	NA	NA	NA	NA	NA	NA	NA	NA	NA	NA	NA	NA	NA	grazed	0	0	0	0	0
NA	2016_09_01	2016_09_01_3_2	NA	NA	NA	NA	NA	NA	NA	NA	NA	NA	NA	NA	NA	NA	NA	NA	NA	NA	NA	NA	NA	NA	NA	NA	NA	NA	NA	NA	NA	NA	NA	NA	NA	NA	NA	NA	NA	NA	NA	NA	NA	avoided	0	0	0	0	0
NA	2016_09_01	2016_09_01_4_1	NA	NA	NA	NA	NA	NA	NA	NA	NA	NA	NA	NA	NA	NA	NA	NA	NA	NA	NA	NA	NA	NA	NA	NA	NA	NA	NA	NA	NA	NA	NA	NA	NA	NA	NA	NA	NA	NA	NA	NA	NA	grazed	0	0	0	0	0
NA	2016_09_01	2016_09_01_4_2	NA	NA	NA	NA	NA	NA	NA	NA	NA	NA	NA	NA	NA	NA	NA	NA	NA	NA	NA	NA	NA	NA	NA	NA	NA	NA	NA	NA	NA	NA	NA	NA	NA	NA	NA	NA	NA	NA	NA	NA	NA	avoided	0	0	0	0	0
NA	2016_09_02	2016_09_02_1_1	NA	NA	NA	NA	NA	NA	NA	NA	NA	NA	NA	NA	NA	NA	NA	NA	NA	NA	NA	NA	NA	NA	NA	NA	NA	NA	NA	NA	NA	NA	NA	NA	NA	NA	NA	NA	NA	NA	NA	NA	NA	grazed	0	0	0	0	0
NA	2016_09_02	2016_09_02_1_2	NA	NA	NA	NA	NA	NA	NA	NA	NA	NA	NA	NA	NA	NA	NA	NA	NA	NA	NA	NA	NA	NA	NA	NA	NA	NA	NA	NA	NA	NA	NA	NA	NA	NA	NA	NA	NA	NA	NA	NA	NA	avoided	0	0	0	0	0
NA	2016_09_02	2016_09_02_2_1	NA	NA	NA	NA	NA	NA	NA	NA	NA	NA	NA	NA	NA	NA	NA	NA	NA	NA	NA	NA	NA	NA	NA	NA	NA	NA	NA	NA	NA	NA	NA	NA	NA	NA	NA	NA	NA	NA	NA	NA	NA	grazed	0	0	0	0	0
NA	2016_09_02	2016_09_02_2_2	NA	NA	NA	NA	NA	NA	NA	NA	NA	NA	NA	NA	NA	NA	NA	NA	NA	NA	NA	NA	NA	NA	NA	NA	NA	NA	NA	NA	NA	NA	NA	NA	NA	NA	NA	NA	NA	NA	NA	NA	NA	avoided	0	0	0	0	0
NA	2016_09_02	2016_09_02_3_1	NA	NA	NA	NA	NA	NA	NA	NA	NA	NA	NA	NA	NA	NA	NA	NA	NA	NA	NA	NA	NA	NA	NA	NA	NA	NA	NA	NA	NA	NA	NA	NA	NA	NA	NA	NA	NA	NA	NA	NA	NA	grazed	0	0	0	0	0
NA	2016_09_02	2016_09_02_3_2	NA	NA	NA	NA	NA	NA	NA	NA	NA	NA	NA	NA	NA	NA	NA	NA	NA	NA	NA	NA	NA	NA	NA	NA	NA	NA	NA	NA	NA	NA	NA	NA	NA	NA	NA	NA	NA	NA	NA	NA	NA	avoided	0	0	0	0	0
NA	2016_09_02	2016_09_02_4_1	NA	NA	NA	NA	NA	NA	NA	NA	NA	NA	NA	NA	NA	NA	NA	NA	NA	NA	NA	NA	NA	NA	NA	NA	NA	NA	NA	NA	NA	NA	NA	NA	NA	NA	NA	NA	NA	NA	NA	NA	NA	grazed	0	0	0	0	0
NA	2016_09_02	2016_09_02_4_2	NA	NA	NA	NA	NA	NA	NA	NA	NA	NA	NA	NA	NA	NA	NA	NA	NA	NA	NA	NA	NA	NA	NA	NA	NA	NA	NA	NA	NA	NA	NA	NA	NA	NA	NA	NA	NA	NA	NA	NA	NA	avoided	0	0	0	0	0
2016_09	2016_09_03	2016_09_03_1_1	FE	F	E	100	80	53	30	0.8	0.3	4	0	1	0	1	0	1	0	0	0	0	1	1.875	0	1.875	5	0	5	13	1	14	7.5	1	1	2	8	3	5	0.333333333	2	2	1	grazed	0	0	0	0	0
2016_09	2016_09_03	2016_09_03_1_2	FE	F	E	100	80	53	30	0.8	0.3	4	0	1	0	1	0	1	0	0	0	0	1	1.875	0	1.875	5	0	5	13	1	14	7.5	1	1	2	8	3	5	0.333333333	2	2	1	avoided	0	0	0	0	0
2016_09	2016_09_03	2016_09_03_2_1	FE	F	E	100	80	53	30	0.8	0.3	4	0	1	0	1	0	1	0	0	0	0	1	1.875	0	1.875	5	0	5	13	1	14	7.5	1	1	2	8	3	5	0.333333333	2	2	1	grazed	0	0	0	0	0
2016_09	2016_09_03	2016_09_03_2_2	FE	F	E	100	80	53	30	0.8	0.3	4	0	1	0	1	0	1	0	0	0	0	1	1.875	0	1.875	5	0	5	13	1	14	7.5	1	1	2	8	3	5	0.333333333	2	2	1	avoided	0	0	0	0	0
2016_09	2016_09_03	2016_09_03_3_1	FE	F	E	100	80	53	30	0.8	0.3	4	0	1	0	1	0	1	0	0	0	0	1	1.875	0	1.875	5	0	5	13	1	14	7.5	1	1	2	8	3	5	0.333333333	2	2	1	grazed	0	0	0	0	0
2016_09	2016_09_03	2016_09_03_3_2	FE	F	E	100	80	53	30	0.8	0.3	4	0	1	0	1	0	1	0	0	0	0	1	1.875	0	1.875	5	0	5	13	1	14	7.5	1	1	2	8	3	5	0.333333333	2	2	1	avoided	0	0	0	0	0
2016_09	2016_09_03	2016_09_03_4_1	FE	F	E	100	80	53	30	0.8	0.3	4	0	1	0	1	0	1	0	0	0	0	1	1.875	0	1.875	5	0	5	13	1	14	7.5	1	1	2	8	3	5	0.333333333	2	2	1	grazed	0	0	0	0	0
2016_09	2016_09_03	2016_09_03_4_2	FE	F	E	100	80	53	30	0.8	0.3	4	0	1	0	1	0	1	0	0	0	0	1	1.875	0	1.875	5	0	5	13	1	14	7.5	1	1	2	8	3	5	0.333333333	2	2	1	avoided	0	0	0	0	0
2016_09	2016_09_04	2016_09_04_1_1	FE	F	E	100	80	53	30	0.8	0.3	4	0	0	0	1	0	1	0	0	0	0	1	20.625	0.625	21.25	7	1	8	13	1	14	7.5	2	0	2	8	5	3	0.666666667	2	2	4	grazed	0	0	0	0	0
2016_09	2016_09_04	2016_09_04_1_2	FE	F	E	100	80	53	30	0.8	0.3	4	0	0	0	1	0	1	0	0	0	0	1	20.625	0.625	21.25	7	1	8	13	1	14	7.5	2	0	2	8	5	3	0.666666667	2	2	4	avoided	0	0	0	0	0
2016_09	2016_09_04	2016_09_04_2_1	FE	F	E	100	80	53	30	0.8	0.3	4	0	0	0	1	0	1	0	0	0	0	1	20.625	0.625	21.25	7	1	8	13	1	14	7.5	2	0	2	8	5	3	0.666666667	2	2	4	grazed	0	0	0	0	0
2016_09	2016_09_04	2016_09_04_2_2	FE	F	E	100	80	53	30	0.8	0.3	4	0	0	0	1	0	1	0	0	0	0	1	20.625	0.625	21.25	7	1	8	13	1	14	7.5	2	0	2	8	5	3	0.666666667	2	2	4	avoided	0	0	0	0	0
2016_09	2016_09_04	2016_09_04_3_1	FE	F	E	100	80	53	30	0.8	0.3	4	0	0	0	1	0	1	0	0	0	0	1	20.625	0.625	21.25	7	1	8	13	1	14	7.5	2	0	2	8	5	3	0.666666667	2	2	4	grazed	0	0	0	0	0
2016_09	2016_09_04	2016_09_04_3_2	FE	F	E	100	80	53	30	0.8	0.3	4	0	0	0	1	0	1	0	0	0	0	1	20.625	0.625	21.25	7	1	8	13	1	14	7.5	2	0	2	8	5	3	0.666666667	2	2	4	avoided	0	0	0	0	0
2016_09	2016_09_04	2016_09_04_4_1	FE	F	E	100	80	53	30	0.8	0.3	4	0	0	0	1	0	1	0	0	0	0	1	20.625	0.625	21.25	7	1	8	13	1	14	7.5	2	0	2	8	5	3	0.666666667	2	2	4	grazed	0	0	0	0	0
2016_09	2016_09_04	2016_09_04_4_2	FE	F	E	100	80	53	30	0.8	0.3	4	0	0	0	1	0	1	0	0	0	0	1	20.625	0.625	21.25	7	1	8	13	1	14	7.5	2	0	2	8	5	3	0.666666667	2	2	4	avoided	0	0	0	0	0
NA	2016_10_01	2016_10_01_1_1	NA	NA	NA	NA	NA	NA	NA	NA	NA	NA	NA	NA	NA	NA	NA	NA	NA	NA	NA	NA	NA	NA	NA	NA	NA	NA	NA	NA	NA	NA	NA	NA	NA	NA	NA	NA	NA	NA	NA	NA	NA	grazed	0	0	0	0	0
NA	2016_10_01	2016_10_01_1_2	NA	NA	NA	NA	NA	NA	NA	NA	NA	NA	NA	NA	NA	NA	NA	NA	NA	NA	NA	NA	NA	NA	NA	NA	NA	NA	NA	NA	NA	NA	NA	NA	NA	NA	NA	NA	NA	NA	NA	NA	NA	avoided	0	0	0	0	0
NA	2016_10_01	2016_10_01_2_1	NA	NA	NA	NA	NA	NA	NA	NA	NA	NA	NA	NA	NA	NA	NA	NA	NA	NA	NA	NA	NA	NA	NA	NA	NA	NA	NA	NA	NA	NA	NA	NA	NA	NA	NA	NA	NA	NA	NA	NA	NA	grazed	0	0	0	0	0
NA	2016_10_01	2016_10_01_2_2	NA	NA	NA	NA	NA	NA	NA	NA	NA	NA	NA	NA	NA	NA	NA	NA	NA	NA	NA	NA	NA	NA	NA	NA	NA	NA	NA	NA	NA	NA	NA	NA	NA	NA	NA	NA	NA	NA	NA	NA	NA	avoided	0	0	0	0	0
NA	2016_10_01	2016_10_01_3_1	NA	NA	NA	NA	NA	NA	NA	NA	NA	NA	NA	NA	NA	NA	NA	NA	NA	NA	NA	NA	NA	NA	NA	NA	NA	NA	NA	NA	NA	NA	NA	NA	NA	NA	NA	NA	NA	NA	NA	NA	NA	grazed	0	0	0	0	0
NA	2016_10_01	2016_10_01_3_2	NA	NA	NA	NA	NA	NA	NA	NA	NA	NA	NA	NA	NA	NA	NA	NA	NA	NA	NA	NA	NA	NA	NA	NA	NA	NA	NA	NA	NA	NA	NA	NA	NA	NA	NA	NA	NA	NA	NA	NA	NA	avoided	0	0	0	0	0
NA	2016_10_01	2016_10_01_4_1	NA	NA	NA	NA	NA	NA	NA	NA	NA	NA	NA	NA	NA	NA	NA	NA	NA	NA	NA	NA	NA	NA	NA	NA	NA	NA	NA	NA	NA	NA	NA	NA	NA	NA	NA	NA	NA	NA	NA	NA	NA	grazed	0	0	0	0	0
NA	2016_10_01	2016_10_01_4_2	NA	NA	NA	NA	NA	NA	NA	NA	NA	NA	NA	NA	NA	NA	NA	NA	NA	NA	NA	NA	NA	NA	NA	NA	NA	NA	NA	NA	NA	NA	NA	NA	NA	NA	NA	NA	NA	NA	NA	NA	NA	avoided	0	0	0	0	0
NA	2016_10_02	2016_10_02_1_1	NA	NA	NA	NA	NA	NA	NA	NA	NA	NA	NA	NA	NA	NA	NA	NA	NA	NA	NA	NA	NA	NA	NA	NA	NA	NA	NA	NA	NA	NA	NA	NA	NA	NA	NA	NA	NA	NA	NA	NA	NA	grazed	0	0	0	0	0
NA	2016_10_02	2016_10_02_1_2	NA	NA	NA	NA	NA	NA	NA	NA	NA	NA	NA	NA	NA	NA	NA	NA	NA	NA	NA	NA	NA	NA	NA	NA	NA	NA	NA	NA	NA	NA	NA	NA	NA	NA	NA	NA	NA	NA	NA	NA	NA	avoided	0	0	0	0	0
NA	2016_10_02	2016_10_02_2_1	NA	NA	NA	NA	NA	NA	NA	NA	NA	NA	NA	NA	NA	NA	NA	NA	NA	NA	NA	NA	NA	NA	NA	NA	NA	NA	NA	NA	NA	NA	NA	NA	NA	NA	NA	NA	NA	NA	NA	NA	NA	grazed	0	0	0	0	0
NA	2016_10_02	2016_10_02_2_2	NA	NA	NA	NA	NA	NA	NA	NA	NA	NA	NA	NA	NA	NA	NA	NA	NA	NA	NA	NA	NA	NA	NA	NA	NA	NA	NA	NA	NA	NA	NA	NA	NA	NA	NA	NA	NA	NA	NA	NA	NA	avoided	0	0	0	0	0
NA	2016_10_02	2016_10_02_3_1	NA	NA	NA	NA	NA	NA	NA	NA	NA	NA	NA	NA	NA	NA	NA	NA	NA	NA	NA	NA	NA	NA	NA	NA	NA	NA	NA	NA	NA	NA	NA	NA	NA	NA	NA	NA	NA	NA	NA	NA	NA	grazed	0	0	0	0	0
NA	2016_10_02	2016_10_02_3_2	NA	NA	NA	NA	NA	NA	NA	NA	NA	NA	NA	NA	NA	NA	NA	NA	NA	NA	NA	NA	NA	NA	NA	NA	NA	NA	NA	NA	NA	NA	NA	NA	NA	NA	NA	NA	NA	NA	NA	NA	NA	avoided	0	0	0	0	0
NA	2016_10_02	2016_10_02_4_1	NA	NA	NA	NA	NA	NA	NA	NA	NA	NA	NA	NA	NA	NA	NA	NA	NA	NA	NA	NA	NA	NA	NA	NA	NA	NA	NA	NA	NA	NA	NA	NA	NA	NA	NA	NA	NA	NA	NA	NA	NA	grazed	0	0	0	0	0
NA	2016_10_02	2016_10_02_4_2	NA	NA	NA	NA	NA	NA	NA	NA	NA	NA	NA	NA	NA	NA	NA	NA	NA	NA	NA	NA	NA	NA	NA	NA	NA	NA	NA	NA	NA	NA	NA	NA	NA	NA	NA	NA	NA	NA	NA	NA	NA	avoided	0	0	0	0	0
2016_10	2016_10_03	2016_10_03_1_1	P_WE	P	WE	7	2.5	2.1	2.5	0.357142857	0.357142857	1	0	0	0	1	0	1	0	0	0	1	1	4.25	2	6.25	6	1	7	13	1	14	6.5	1	3	4	6	4	2	0.444444444	3	2	2	grazed	0	0	0	0	0
2016_10	2016_10_03	2016_10_03_1_2	P_WE	P	WE	7	2.5	2.1	2.5	0.357142857	0.357142857	1	0	0	0	1	0	1	0	0	0	1	1	4.25	2	6.25	6	1	7	13	1	14	6.5	1	3	4	6	4	2	0.444444444	3	2	2	avoided	0	0	0	0	0
2016_10	2016_10_03	2016_10_03_2_1	P_WE	P	WE	7	2.5	2.1	2.5	0.357142857	0.357142857	1	0	0	0	1	0	1	0	0	0	1	1	4.25	2	6.25	6	1	7	13	1	14	6.5	1	3	4	6	4	2	0.444444444	3	2	2	grazed	0	0	0	0	0
2016_10	2016_10_03	2016_10_03_2_2	P_WE	P	WE	7	2.5	2.1	2.5	0.357142857	0.357142857	1	0	0	0	1	0	1	0	0	0	1	1	4.25	2	6.25	6	1	7	13	1	14	6.5	1	3	4	6	4	2	0.444444444	3	2	2	avoided	0	0	0	0	0
2016_10	2016_10_03	2016_10_03_3_1	P_WE	P	WE	7	2.5	2.1	2.5	0.357142857	0.357142857	1	0	0	0	1	0	1	0	0	0	1	1	4.25	2	6.25	6	1	7	13	1	14	6.5	1	3	4	6	4	2	0.444444444	3	2	2	grazed	0	0	0	0	0
2016_10	2016_10_03	2016_10_03_3_2	P_WE	P	WE	7	2.5	2.1	2.5	0.357142857	0.357142857	1	0	0	0	1	0	1	0	0	0	1	1	4.25	2	6.25	6	1	7	13	1	14	6.5	1	3	4	6	4	2	0.444444444	3	2	2	avoided	0	0	0	0	0
2016_10	2016_10_03	2016_10_03_4_1	P_WE	P	WE	7	2.5	2.1	2.5	0.357142857	0.357142857	1	0	0	0	1	0	1	0	0	0	1	1	4.25	2	6.25	6	1	7	13	1	14	6.5	1	3	4	6	4	2	0.444444444	3	2	2	grazed	0	0	0	0	0
2016_10	2016_10_03	2016_10_03_4_2	P_WE	P	WE	7	2.5	2.1	2.5	0.357142857	0.357142857	1	0	0	0	1	0	1	0	0	0	1	1	4.25	2	6.25	6	1	7	13	1	14	6.5	1	3	4	6	4	2	0.444444444	3	2	2	avoided	0	0	0	0	0
2016_10	2016_10_04	2016_10_04_1_1	P_WE	P	WE	7	2.5	2.1	2.5	0.357142857	0.357142857	1	0	0	1	1	0	0	0	0	0	0	1	10.75	1.75	12.5	9	1	10	13	1	14	6.5	3	1	4	6	3	3	0.461538462	3	4	3	grazed	0	0	0	0	0
2016_10	2016_10_04	2016_10_04_1_2	P_WE	P	WE	7	2.5	2.1	2.5	0.357142857	0.357142857	1	0	0	1	1	0	0	0	0	0	0	1	10.75	1.75	12.5	9	1	10	13	1	14	6.5	3	1	4	6	3	3	0.461538462	3	4	3	avoided	0	0	0	0	0
2016_10	2016_10_04	2016_10_04_2_1	P_WE	P	WE	7	2.5	2.1	2.5	0.357142857	0.357142857	1	0	0	1	1	0	0	0	0	0	0	1	10.75	1.75	12.5	9	1	10	13	1	14	6.5	3	1	4	6	3	3	0.461538462	3	4	3	grazed	1	0	0	0	0
2016_10	2016_10_04	2016_10_04_2_2	P_WE	P	WE	7	2.5	2.1	2.5	0.357142857	0.357142857	1	0	0	1	1	0	0	0	0	0	0	1	10.75	1.75	12.5	9	1	10	13	1	14	6.5	3	1	4	6	3	3	0.461538462	3	4	3	avoided	0	0	0	0	0
2016_10	2016_10_04	2016_10_04_3_1	P_WE	P	WE	7	2.5	2.1	2.5	0.357142857	0.357142857	1	0	0	1	1	0	0	0	0	0	0	1	10.75	1.75	12.5	9	1	10	13	1	14	6.5	3	1	4	6	3	3	0.461538462	3	4	3	grazed	0	0	0	0	0
2016_10	2016_10_04	2016_10_04_3_2	P_WE	P	WE	7	2.5	2.1	2.5	0.357142857	0.357142857	1	0	0	1	1	0	0	0	0	0	0	1	10.75	1.75	12.5	9	1	10	13	1	14	6.5	3	1	4	6	3	3	0.461538462	3	4	3	avoided	0	0	0	0	0
2016_10	2016_10_04	2016_10_04_4_1	P_WE	P	WE	7	2.5	2.1	2.5	0.357142857	0.357142857	1	0	0	1	1	0	0	0	0	0	0	1	10.75	1.75	12.5	9	1	10	13	1	14	6.5	3	1	4	6	3	3	0.461538462	3	4	3	grazed	0	0	0	0	0
2016_10	2016_10_04	2016_10_04_4_2	P_WE	P	WE	7	2.5	2.1	2.5	0.357142857	0.357142857	1	0	0	1	1	0	0	0	0	0	0	1	10.75	1.75	12.5	9	1	10	13	1	14	6.5	3	1	4	6	3	3	0.461538462	3	4	3	avoided	0	0	0	0	0
2016_11	2016_11_01	2016_11_01_1_1	FE	F	E	130	8	26	8	0.061538462	0.061538462	2	80	0	1	1	0	1	1	0	0	1	0	28.375	0.75	29.125	13	1	14	22	2	24	10.75	0	0	0	7	4	3	0.444444444	6	4	4	grazed	0	0	0	0	0
2016_11	2016_11_01	2016_11_01_1_2	FE	F	E	130	8	26	8	0.061538462	0.061538462	2	80	0	1	1	0	1	1	0	0	1	0	28.375	0.75	29.125	13	1	14	22	2	24	10.75	0	0	0	7	4	3	0.444444444	6	4	4	avoided	0	0	0	0	0
2016_11	2016_11_01	2016_11_01_2_1	FE	F	E	130	8	26	8	0.061538462	0.061538462	2	80	0	1	1	0	1	1	0	0	1	0	28.375	0.75	29.125	13	1	14	22	2	24	10.75	0	0	0	7	4	3	0.444444444	6	4	4	grazed	0	0	0	0	0
2016_11	2016_11_01	2016_11_01_2_2	FE	F	E	130	8	26	8	0.061538462	0.061538462	2	80	0	1	1	0	1	1	0	0	1	0	28.375	0.75	29.125	13	1	14	22	2	24	10.75	0	0	0	7	4	3	0.444444444	6	4	4	avoided	0	0	0	0	0
2016_11	2016_11_01	2016_11_01_3_1	FE	F	E	130	8	26	8	0.061538462	0.061538462	2	80	0	1	1	0	1	1	0	0	1	0	28.375	0.75	29.125	13	1	14	22	2	24	10.75	0	0	0	7	4	3	0.444444444	6	4	4	grazed	0	0	0	0	0
2016_11	2016_11_01	2016_11_01_3_2	FE	F	E	130	8	26	8	0.061538462	0.061538462	2	80	0	1	1	0	1	1	0	0	1	0	28.375	0.75	29.125	13	1	14	22	2	24	10.75	0	0	0	7	4	3	0.444444444	6	4	4	avoided	1	0	0	0	0
2016_11	2016_11_01	2016_11_01_4_1	FE	F	E	130	8	26	8	0.061538462	0.061538462	2	80	0	1	1	0	1	1	0	0	1	0	28.375	0.75	29.125	13	1	14	22	2	24	10.75	0	0	0	7	4	3	0.444444444	6	4	4	grazed	0	0	0	0	0
2016_11	2016_11_01	2016_11_01_4_2	FE	F	E	130	8	26	8	0.061538462	0.061538462	2	80	0	1	1	0	1	1	0	0	1	0	28.375	0.75	29.125	13	1	14	22	2	24	10.75	0	0	0	7	4	3	0.444444444	6	4	4	avoided	0	0	0	0	0
2016_11	2016_11_02	2016_11_02_1_1	FE	F	E	130	8	26	8	0.061538462	0.061538462	2	80	0	1	1	0	1	1	0	0	1	0	18.875	3.25	22.125	12	1	13	22	2	24	10.75	0	0	0	7	4	3	0.375	5	5	3	grazed	0	0	0	0	0
2016_11	2016_11_02	2016_11_02_1_2	FE	F	E	130	8	26	8	0.061538462	0.061538462	2	80	0	1	1	0	1	1	0	0	1	0	18.875	3.25	22.125	12	1	13	22	2	24	10.75	0	0	0	7	4	3	0.375	5	5	3	avoided	0	0	0	0	0
2016_11	2016_11_02	2016_11_02_2_1	FE	F	E	130	8	26	8	0.061538462	0.061538462	2	80	0	1	1	0	1	1	0	0	1	0	18.875	3.25	22.125	12	1	13	22	2	24	10.75	0	0	0	7	4	3	0.375	5	5	3	grazed	0	0	0	0	0
2016_11	2016_11_02	2016_11_02_2_2	FE	F	E	130	8	26	8	0.061538462	0.061538462	2	80	0	1	1	0	1	1	0	0	1	0	18.875	3.25	22.125	12	1	13	22	2	24	10.75	0	0	0	7	4	3	0.375	5	5	3	avoided	0	0	0	0	0
2016_11	2016_11_02	2016_11_02_3_1	FE	F	E	130	8	26	8	0.061538462	0.061538462	2	80	0	1	1	0	1	1	0	0	1	0	18.875	3.25	22.125	12	1	13	22	2	24	10.75	0	0	0	7	4	3	0.375	5	5	3	grazed	0	0	0	0	0
2016_11	2016_11_02	2016_11_02_3_2	FE	F	E	130	8	26	8	0.061538462	0.061538462	2	80	0	1	1	0	1	1	0	0	1	0	18.875	3.25	22.125	12	1	13	22	2	24	10.75	0	0	0	7	4	3	0.375	5	5	3	avoided	1	0	0	0	0
2016_11	2016_11_02	2016_11_02_4_1	FE	F	E	130	8	26	8	0.061538462	0.061538462	2	80	0	1	1	0	1	1	0	0	1	0	18.875	3.25	22.125	12	1	13	22	2	24	10.75	0	0	0	7	4	3	0.375	5	5	3	grazed	0	0	0	0	0
2016_11	2016_11_02	2016_11_02_4_2	FE	F	E	130	8	26	8	0.061538462	0.061538462	2	80	0	1	1	0	1	1	0	0	1	0	18.875	3.25	22.125	12	1	13	22	2	24	10.75	0	0	0	7	4	3	0.375	5	5	3	avoided	0	0	0	0	0
NA	2016_11_03	2016_11_03_1_1	NA	NA	NA	NA	NA	NA	NA	NA	NA	NA	NA	NA	NA	NA	NA	NA	NA	NA	NA	NA	NA	NA	NA	NA	NA	NA	NA	NA	NA	NA	NA	NA	NA	NA	NA	NA	NA	NA	NA	NA	NA	grazed	0	0	0	0	0
NA	2016_11_03	2016_11_03_1_2	NA	NA	NA	NA	NA	NA	NA	NA	NA	NA	NA	NA	NA	NA	NA	NA	NA	NA	NA	NA	NA	NA	NA	NA	NA	NA	NA	NA	NA	NA	NA	NA	NA	NA	NA	NA	NA	NA	NA	NA	NA	avoided	0	0	0	0	0
NA	2016_11_03	2016_11_03_2_1	NA	NA	NA	NA	NA	NA	NA	NA	NA	NA	NA	NA	NA	NA	NA	NA	NA	NA	NA	NA	NA	NA	NA	NA	NA	NA	NA	NA	NA	NA	NA	NA	NA	NA	NA	NA	NA	NA	NA	NA	NA	grazed	1	0	0	0	0
NA	2016_11_03	2016_11_03_2_2	NA	NA	NA	NA	NA	NA	NA	NA	NA	NA	NA	NA	NA	NA	NA	NA	NA	NA	NA	NA	NA	NA	NA	NA	NA	NA	NA	NA	NA	NA	NA	NA	NA	NA	NA	NA	NA	NA	NA	NA	NA	avoided	1	0	0	0	0
NA	2016_11_03	2016_11_03_3_1	NA	NA	NA	NA	NA	NA	NA	NA	NA	NA	NA	NA	NA	NA	NA	NA	NA	NA	NA	NA	NA	NA	NA	NA	NA	NA	NA	NA	NA	NA	NA	NA	NA	NA	NA	NA	NA	NA	NA	NA	NA	grazed	1	0	0	0	0
NA	2016_11_03	2016_11_03_3_2	NA	NA	NA	NA	NA	NA	NA	NA	NA	NA	NA	NA	NA	NA	NA	NA	NA	NA	NA	NA	NA	NA	NA	NA	NA	NA	NA	NA	NA	NA	NA	NA	NA	NA	NA	NA	NA	NA	NA	NA	NA	avoided	1	0	0	0	0
NA	2016_11_03	2016_11_03_4_1	NA	NA	NA	NA	NA	NA	NA	NA	NA	NA	NA	NA	NA	NA	NA	NA	NA	NA	NA	NA	NA	NA	NA	NA	NA	NA	NA	NA	NA	NA	NA	NA	NA	NA	NA	NA	NA	NA	NA	NA	NA	grazed	0	0	0	0	0
NA	2016_11_03	2016_11_03_4_2	NA	NA	NA	NA	NA	NA	NA	NA	NA	NA	NA	NA	NA	NA	NA	NA	NA	NA	NA	NA	NA	NA	NA	NA	NA	NA	NA	NA	NA	NA	NA	NA	NA	NA	NA	NA	NA	NA	NA	NA	NA	avoided	0	0	0	0	0
2016_11	2016_11_04	2016_11_04_1_1	FE	F	E	130	8	26	8	0.061538462	0.061538462	2	80	0	1	1	0	1	1	0	0	1	1	14.75	0	14.75	12	2	14	22	2	24	10.75	0	0	0	7	3	4	0.666666667	3	4	7	grazed	1	0	0	0	0
2016_11	2016_11_04	2016_11_04_1_2	FE	F	E	130	8	26	8	0.061538462	0.061538462	2	80	0	1	1	0	1	1	0	0	1	1	14.75	0	14.75	12	2	14	22	2	24	10.75	0	0	0	7	3	4	0.666666667	3	4	7	avoided	1	0	0	0	0
2016_11	2016_11_04	2016_11_04_2_1	FE	F	E	130	8	26	8	0.061538462	0.061538462	2	80	0	1	1	0	1	1	0	0	1	1	14.75	0	14.75	12	2	14	22	2	24	10.75	0	0	0	7	3	4	0.666666667	3	4	7	grazed	1	0	0	0	0
2016_11	2016_11_04	2016_11_04_2_2	FE	F	E	130	8	26	8	0.061538462	0.061538462	2	80	0	1	1	0	1	1	0	0	1	1	14.75	0	14.75	12	2	14	22	2	24	10.75	0	0	0	7	3	4	0.666666667	3	4	7	avoided	0	0	0	0	0
2016_11	2016_11_04	2016_11_04_3_1	FE	F	E	130	8	26	8	0.061538462	0.061538462	2	80	0	1	1	0	1	1	0	0	1	1	14.75	0	14.75	12	2	14	22	2	24	10.75	0	0	0	7	3	4	0.666666667	3	4	7	grazed	1	0	0	0	0
2016_11	2016_11_04	2016_11_04_3_2	FE	F	E	130	8	26	8	0.061538462	0.061538462	2	80	0	1	1	0	1	1	0	0	1	1	14.75	0	14.75	12	2	14	22	2	24	10.75	0	0	0	7	3	4	0.666666667	3	4	7	avoided	0	0	0	0	0
2016_11	2016_11_04	2016_11_04_4_1	FE	F	E	130	8	26	8	0.061538462	0.061538462	2	80	0	1	1	0	1	1	0	0	1	1	14.75	0	14.75	12	2	14	22	2	24	10.75	0	0	0	7	3	4	0.666666667	3	4	7	grazed	0	0	0	0	0
2016_11	2016_11_04	2016_11_04_4_2	FE	F	E	130	8	26	8	0.061538462	0.061538462	2	80	0	1	1	0	1	1	0	0	1	1	14.75	0	14.75	12	2	14	22	2	24	10.75	0	0	0	7	3	4	0.666666667	3	4	7	avoided	1	0	0	0	0
2016_12	2016_12_01	2016_12_01_1_1	FE	F	E	195	25	33	25	0.128205128	0.128205128	3.3	30	0	1	1	0	1	0	0	0	1	0	14.5	8.75	23.25	7	2	9	18	4	22	10.75	0	7	7	3	1	2	0.615384615	1	4	4	grazed	0	0	0	0	0
2016_12	2016_12_01	2016_12_01_1_2	FE	F	E	195	25	33	25	0.128205128	0.128205128	3.3	30	0	1	1	0	1	0	0	0	1	0	14.5	8.75	23.25	7	2	9	18	4	22	10.75	0	7	7	3	1	2	0.615384615	1	4	4	avoided	0	0	0	0	0
2016_12	2016_12_01	2016_12_01_2_1	FE	F	E	195	25	33	25	0.128205128	0.128205128	3.3	30	0	1	1	0	1	0	0	0	1	0	14.5	8.75	23.25	7	2	9	18	4	22	10.75	0	7	7	3	1	2	0.615384615	1	4	4	grazed	0	0	0	0	0
2016_12	2016_12_01	2016_12_01_2_2	FE	F	E	195	25	33	25	0.128205128	0.128205128	3.3	30	0	1	1	0	1	0	0	0	1	0	14.5	8.75	23.25	7	2	9	18	4	22	10.75	0	7	7	3	1	2	0.615384615	1	4	4	avoided	0	0	0	0	0
2016_12	2016_12_01	2016_12_01_3_1	FE	F	E	195	25	33	25	0.128205128	0.128205128	3.3	30	0	1	1	0	1	0	0	0	1	0	14.5	8.75	23.25	7	2	9	18	4	22	10.75	0	7	7	3	1	2	0.615384615	1	4	4	grazed	0	0	0	0	0
2016_12	2016_12_01	2016_12_01_3_2	FE	F	E	195	25	33	25	0.128205128	0.128205128	3.3	30	0	1	1	0	1	0	0	0	1	0	14.5	8.75	23.25	7	2	9	18	4	22	10.75	0	7	7	3	1	2	0.615384615	1	4	4	avoided	0	0	0	0	0
2016_12	2016_12_01	2016_12_01_4_1	FE	F	E	195	25	33	25	0.128205128	0.128205128	3.3	30	0	1	1	0	1	0	0	0	1	0	14.5	8.75	23.25	7	2	9	18	4	22	10.75	0	7	7	3	1	2	0.615384615	1	4	4	grazed	0	0	0	0	0
2016_12	2016_12_01	2016_12_01_4_2	FE	F	E	195	25	33	25	0.128205128	0.128205128	3.3	30	0	1	1	0	1	0	0	0	1	0	14.5	8.75	23.25	7	2	9	18	4	22	10.75	0	7	7	3	1	2	0.615384615	1	4	4	avoided	0	0	0	0	0
2016_12	2016_12_02	2016_12_02_1_1	FE	F	E	195	25	33	25	0.128205128	0.128205128	3.3	30	0	1	1	0	1	0	0	0	1	1	5.625	0.625	6.25	13	2	15	18	4	22	10.75	5	2	7	3	1	2	0.421052632	5	6	4	grazed	0	0	0	0	0
2016_12	2016_12_02	2016_12_02_1_2	FE	F	E	195	25	33	25	0.128205128	0.128205128	3.3	30	0	1	1	0	1	0	0	0	1	1	5.625	0.625	6.25	13	2	15	18	4	22	10.75	5	2	7	3	1	2	0.421052632	5	6	4	avoided	0	0	0	0	0
2016_12	2016_12_02	2016_12_02_2_1	FE	F	E	195	25	33	25	0.128205128	0.128205128	3.3	30	0	1	1	0	1	0	0	0	1	1	5.625	0.625	6.25	13	2	15	18	4	22	10.75	5	2	7	3	1	2	0.421052632	5	6	4	grazed	0	0	0	0	0
2016_12	2016_12_02	2016_12_02_2_2	FE	F	E	195	25	33	25	0.128205128	0.128205128	3.3	30	0	1	1	0	1	0	0	0	1	1	5.625	0.625	6.25	13	2	15	18	4	22	10.75	5	2	7	3	1	2	0.421052632	5	6	4	avoided	0	0	0	0	0
2016_12	2016_12_02	2016_12_02_3_1	FE	F	E	195	25	33	25	0.128205128	0.128205128	3.3	30	0	1	1	0	1	0	0	0	1	1	5.625	0.625	6.25	13	2	15	18	4	22	10.75	5	2	7	3	1	2	0.421052632	5	6	4	grazed	1	0	0	0	0
2016_12	2016_12_02	2016_12_02_3_2	FE	F	E	195	25	33	25	0.128205128	0.128205128	3.3	30	0	1	1	0	1	0	0	0	1	1	5.625	0.625	6.25	13	2	15	18	4	22	10.75	5	2	7	3	1	2	0.421052632	5	6	4	avoided	0	0	0	0	0
2016_12	2016_12_02	2016_12_02_4_1	FE	F	E	195	25	33	25	0.128205128	0.128205128	3.3	30	0	1	1	0	1	0	0	0	1	1	5.625	0.625	6.25	13	2	15	18	4	22	10.75	5	2	7	3	1	2	0.421052632	5	6	4	grazed	0	0	0	0	0
2016_12	2016_12_02	2016_12_02_4_2	FE	F	E	195	25	33	25	0.128205128	0.128205128	3.3	30	0	1	1	0	1	0	0	0	1	1	5.625	0.625	6.25	13	2	15	18	4	22	10.75	5	2	7	3	1	2	0.421052632	5	6	4	avoided	0	0	0	0	0
[truncated: 1,904 more rows]
[truncated: 197 more columns]
