# Supplementary material
Source: MDPI journal article supplement (https://www.mdpi.com/2071-1050/12/24/10641)
Supplement: s1 [file s1 › 1040089_SupplementaryMaterial/Hueppe_etal_Figure S1.pdf]

**Supplementary Material Figure S1.** Examples of photographic botanical documentation of vegetation found on plots.

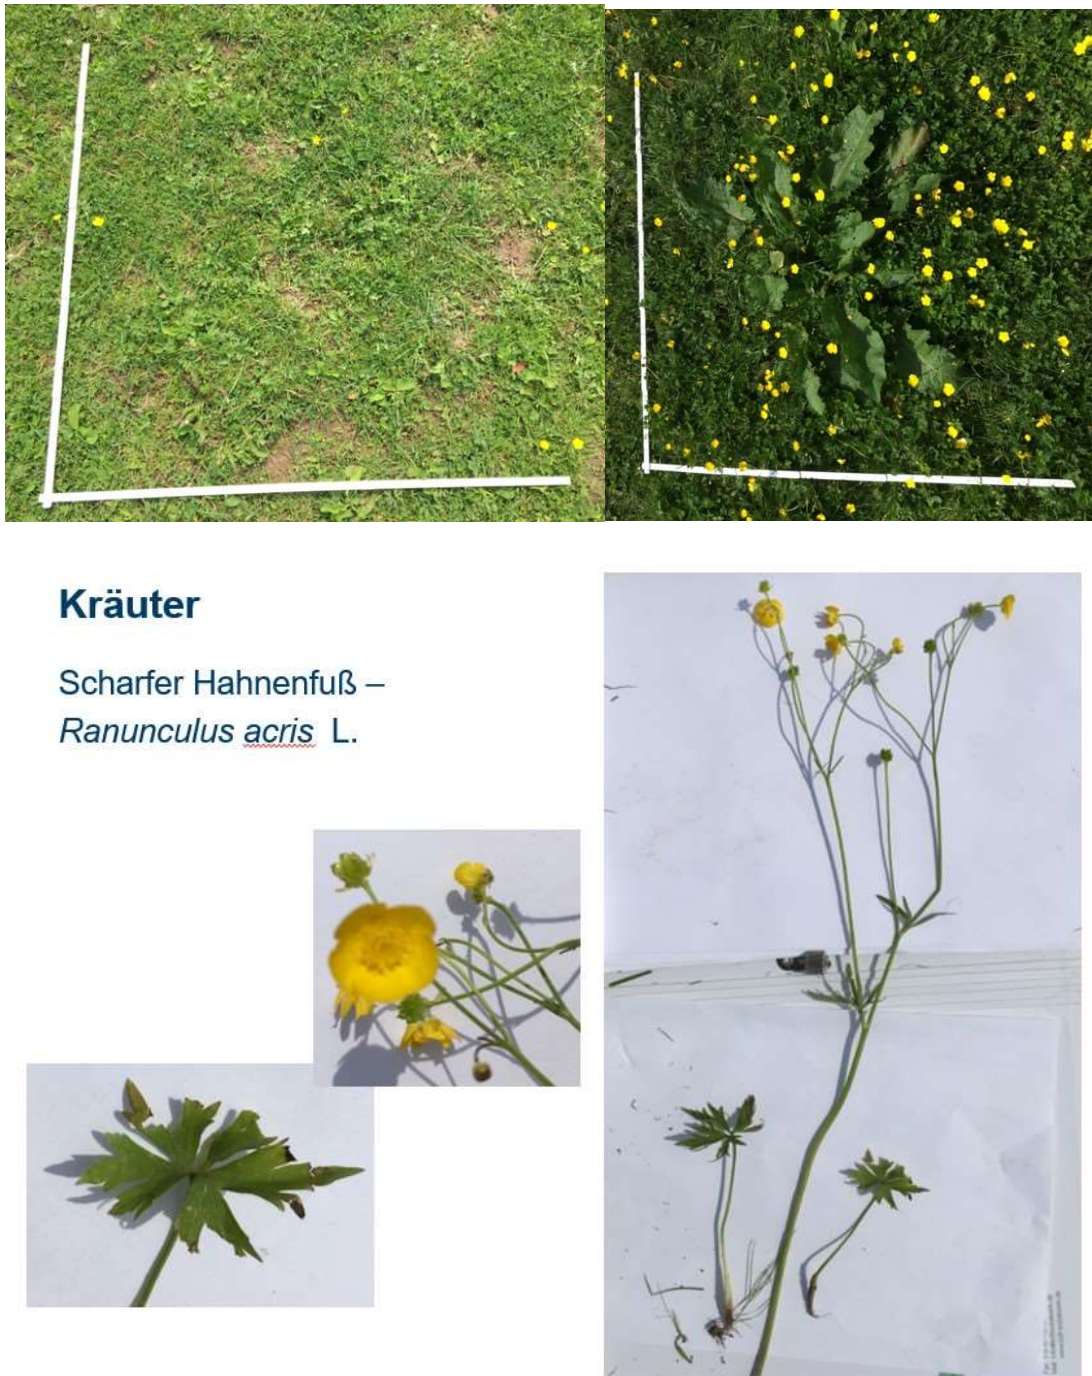

**Figure S1.** Examples of photographic botanical documentation of vegetation found on plots.
