# Supplementary material
Source: MDPI journal article supplement (https://www.mdpi.com/2071-1050/12/24/10641)
Supplement: s1 [file s1 › 1040089_SupplementaryMaterial/Hueppe_etal_Table S1.pdf]

# 1 Supplementary Material

## 2 Supplementary Material Table S1. Standardised data sheet assessing farm structure data.

| <b>Modul Weidemanagement 2018</b>                    |                                                          |       |
|------------------------------------------------------|----------------------------------------------------------|-------|
| Name Betrieb (Name, z.B. "Helenenhof")               |                                                          |       |
| Name Inhaber/Bewirtschafter                          |                                                          |       |
| Betrieb Nummer in 2017 (z.B. 01 oder 11)             |                                                          |       |
| Betrieb (ID Jahr_Betriebsnummer, z.B. "2018_02")     |                                                          | 2018_ |
| <b>Datenblatt zur Abgabe</b>                         |                                                          |       |
| Variable                                             | Einheit/Ausprägung                                       | Daten |
| Großregion (z.B. "Leinetal", "Wesermarsch", "Eifel") |                                                          |       |
| <b>Management</b>                                    |                                                          |       |
| Landwirtschaftliche Nutzfläche                       | ha                                                       |       |
| Ackerfläche                                          | ha                                                       |       |
| Grünlandfläche                                       | ha                                                       |       |
| Arrondierung                                         | mittlere Entfernung der Flächen vom Betrieb in km        |       |
| Betriebstyp                                          | Haupt-, Neben-, Zuerwerb                                 |       |
| Arbeitskräfte                                        | AK/Betrieb                                               |       |
| Ausbildung Betriebsleiter                            | Land-, Pferdewirtschaft, keine fachbezogene              |       |
| Berufserfahrung Landwirtschaft/Pferdewirtschaft      | Jahre                                                    |       |
| Betriebsausrichtung                                  | Gestüt, Pensionshaltung, Ausbildung etc.                 |       |
| Andere Tierhaltungen auf Betrieb                     | Rinder, Schafe, Monogastrier                             |       |
| Anzahl Pferde                                        | je Betrieb                                               |       |
| Anzahl Pferde-GV                                     | je Betrieb                                               |       |
| Pferdetypen                                          | Kleinpferde, Warm-, Kaltblüter, etc.                     |       |
| Von Pferden genutzte LN, Futterfläche, Weide, Heu    | ha                                                       |       |
| Heu-/Silage-Zukauf                                   | % von Rauhfutterbedarf, konserviertes Futter, ohne Weide |       |
| Sonstige Angaben:                                    |                                                          |       |

3

4
