# Supplementary material
Source: MDPI journal article supplement (https://www.mdpi.com/2071-1050/12/24/10641)
Supplement: s1 [file s1 › 1040089_SupplementaryMaterial/Hueppe_etal_Table S3.pdf]

## 7

| Modul Weidemanagement 2018   |                               |                                                                                          |                |             |             |             |             |             |             |                 |             |             |
|------------------------------|-------------------------------|------------------------------------------------------------------------------------------|----------------|-------------|-------------|-------------|-------------|-------------|-------------|-----------------|-------------|-------------|
| Betrieb (Name)               |                               |                                                                                          |                |             |             |             |             |             |             |                 |             |             |
| Betrieb (ID)                 | 2018_                         |                                                                                          |                |             |             |             |             |             |             |                 |             |             |
| <b>Datenblatt zur Abgabe</b> |                               | <b>Schlag 1</b>                                                                          |                |             |             |             |             |             |             | <b>Schlag 2</b> |             |             |
|                              |                               | 1.1                                                                                      | 1.2            | 2.1         | 2.2         | 3.1         | 3.2         | 4.1         | 4.2         | 1.1             | 1.2         | 2.1         |
|                              |                               | befressen                                                                                | gemieden       | befressen   | gemieden    | befressen   | gemieden    | befressen   | gemieden    | befressen       | gemieden    | befressen   |
|                              | Sample_ID                     | 2018__1.1.1                                                                              | 2018__1.1.2    | 2018__1.2.1 | 2018__1.2.2 | 2018__1.3.1 | 2018__1.3.2 | 2018__1.4.1 | 2018__1.4.2 | 2018__2.1.1     | 2018__2.1.2 | 2018__2.1.3 |
| Geographische Länge          |                               |                                                                                          |                |             |             |             |             |             |             |                 |             |             |
| Geographische Breite         |                               |                                                                                          |                |             |             |             |             |             |             |                 |             |             |
|                              | Offener Boden                 |                                                                                          |                |             |             |             |             |             |             |                 |             |             |
|                              | Ertragsanteil Gräser          |                                                                                          |                |             |             |             |             |             |             |                 |             |             |
|                              | Ertragsanteil Kräuter         |                                                                                          |                |             |             |             |             |             |             |                 |             |             |
|                              | Ertragsanteil Leguminosen     |                                                                                          |                |             |             |             |             |             |             |                 |             |             |
| <b>Gräser</b>                |                               | Art                                                                                      | Ertragsanteile |             |             |             |             |             |             |                 |             |             |
|                              |                               |                                                                                          |                |             |             |             |             |             |             |                 |             |             |
|                              |                               |                                                                                          |                |             |             |             |             |             |             |                 |             |             |
|                              |                               |                                                                                          |                |             |             |             |             |             |             |                 |             |             |
|                              |                               |                                                                                          |                |             |             |             |             |             |             |                 |             |             |
|                              |                               |                                                                                          |                |             |             |             |             |             |             |                 |             |             |
|                              | Ertragsanteil Weitere Gräser  |                                                                                          |                |             |             |             |             |             |             |                 |             |             |
| <b>Kräuter</b>               |                               | Art                                                                                      | Ertragsanteile |             |             |             |             |             |             |                 |             |             |
|                              |                               |                                                                                          |                |             |             |             |             |             |             |                 |             |             |
|                              |                               |                                                                                          |                |             |             |             |             |             |             |                 |             |             |
|                              |                               |                                                                                          |                |             |             |             |             |             |             |                 |             |             |
|                              |                               |                                                                                          |                |             |             |             |             |             |             |                 |             |             |
|                              |                               |                                                                                          |                |             |             |             |             |             |             |                 |             |             |
|                              |                               |                                                                                          |                |             |             |             |             |             |             |                 |             |             |
|                              | bitte alphabetisch sortieren! |                                                                                          |                |             |             |             |             |             |             |                 |             |             |
|                              |                               |                                                                                          |                |             |             |             |             |             |             |                 |             |             |
|                              |                               |                                                                                          |                |             |             |             |             |             |             |                 |             |             |
|                              |                               |                                                                                          |                |             |             |             |             |             |             |                 |             |             |
|                              |                               |                                                                                          |                |             |             |             |             |             |             |                 |             |             |
|                              |                               |                                                                                          |                |             |             |             |             |             |             |                 |             |             |
| <b>Leguminosen</b>           |                               | Art                                                                                      | Ertragsanteile |             |             |             |             |             |             |                 |             |             |
|                              |                               |                                                                                          |                |             |             |             |             |             |             |                 |             |             |
|                              |                               |                                                                                          |                |             |             |             |             |             |             |                 |             |             |
|                              |                               |                                                                                          |                |             |             |             |             |             |             |                 |             |             |
|                              |                               |                                                                                          |                |             |             |             |             |             |             |                 |             |             |
|                              |                               |                                                                                          |                |             |             |             |             |             |             |                 |             |             |
|                              | beachte: !!                   | je subplot: Ertragsanteil Gräser und Summe Ertragsanteile Kräuter und Leguminosen = 100% |                |             |             |             |             |             |             |                 |             |             |
|                              | Ertragsanteile GESAMT:        | 0                                                                                        | 0              | 0           | 0           | 0           | 0           | 0           | 0           | 0               | 0           | 0           |
