# Supplementary material
Source: MDPI journal article supplement (https://www.mdpi.com/2071-1050/12/24/10641)
Supplement: s1 [file s1 › 1040089_SupplementaryMaterial/Hueppe_etal_Table S5.docx]

**Table S5.** Regression coefficients of models: **(a)** socio-economic class explaining farm structure, grassland management and vegetation characteristics (only target variables with socio-economic parameters remaining in model are shown), **(b)** socio-economic class and farm structure data explaining vegetation characteristics and **(c)** socio-economic class and grassland management explaining vegetation characteristics. P = part-time business, E = with agricultural education. Significant
(P ≤ 0.05) effects are shown in bold. Missing values representing parameters not remaining in model after model validation.

| **(a) Socio-economic class** | | | | | | | | | | | | | | | | | | | | | | | | |
| --- | --- | --- | --- | --- | --- | --- | --- | --- | --- | --- | --- | --- | --- | --- | --- | --- | --- | --- | --- | --- | --- | --- | --- | --- |
|  | | **Farm structure** | | | | | | | | | | **Grassland management** | | | | | | **Vegetation characteristics** | | | | | | |
| **Coefficients** | | **Grassland**  **area** | | **Proportion horse area** | | **Purchase** | | **Horses (LU)** | | **Labour** | | **Mineral fertiliser** | | **Organic fertiliser** | | **Reseeding** | | **alpha-**  **HNV** | | **gamma-HNV** | | **Sørensen index** | | |
|  | (Intercept) | 3.023 | | 2.434 | | -1.402 | | 3.586 | | 1.145 | | 0.681 | | -3.328 | | 6.801 | | -1.352 | | 2.5 | | 0.5487 | | |
| Income type | P | **-0.860** | | -0.547 | | - | | -1.189 | | **-0.926** | | - | | - | | - | | - | | - | | - | | |
| Education | E | **0.475** | | **-2.470** | | **-1.482** | | - | | -0.196 | | 1.753 | | 1.775 | | **-14.364** | | -0.658 | | -0.640 | | -0.184 | | |
| I x E | P x E | - | | **2.651** | | - | | - | | - | | - | | - | | - | | - | | - | | - | | |
| **(b) Socio-economic class + farm structure data** | | | | | | | | | | | | | | | | | | | | | | | |
| **Coefficients** | | **YS Forbs** | | **alpha-**  **FSR** | | **beta-**  **FSR** | | **gamma-**  **FSR** | | **alpha-**  **HNV** | | **beta-**  **HNV** | | **gamma-HNV** | | **alpha-**  **WR** | | **beta-**  **WR** | | **gamma-**  **WR** | | **Sørensen index** | | |
|  | (Intercept) | **-1.449** | | 2.105 | | **1.962** | | 2.646 | | -2.386 | | 0.595 | | 1.311 | | 3.006 | | 2.073 | | 5.164 | | 0.549 | | |
| Income type | P | - | | - | | - | | - | | - | | - | | - | | - | | - | | - | | - | | |
| Education | E | - | | - | | - | | - | | - | | - | | - | | - | | - | | - | | -0.182 | | |
| IxE | P x E | - | | - | | - | | - | | - | | - | | - | | - | | - | | - | | - | | |
| Grassland area |  | - | | 0.001 | | - | | 0.001 | | - | | - | | 0.011 | | - | | - | | 0.006 | | - | | |
| Proportion horse area |  | **0.360** | | 0.186 | | - | | 0.196 | | 1.385 | | 0.614 | | 1.519 | | 0.005 | | - | | - | | - | | |
| Purchase |  | - | | - | | - | | - | | - | | - | | - | | - | | - | | - | | - | | |
| Horses (LU) |  | **0.003** | | - | | - | | - | | -0.016 | | - | | -0.015 | | - | | - | | - | | - | | |
| Labour |  | **-0.065** | | - | | **0.029** | | - | | - | | - | | - | | - | | 0.072 | | - | | - | | |
| **(c) Socio-economic class + fertilisation + grassland management** | | | | | | | | | | | | | | | | | | | | | | | | | | |
| **Coefficients** | | | **YS Forbs** | | **alpha-**  **FSR** | |  | |  | | **alpha-**  **HNV** | |  | |  | | **alpha-**  **WR** | |  | |  | | **Sørensen index** | | |
|  | (Intercept) | **-0.861** | | 2.434 | |  | |  | | -0.680 | |  | |  | | 3.274 | |  | |  | | 0.486 | | |
| Income type | P | - | | - | |  | |  | | - | |  | |  | | - | |  | |  | | - | | |
| Education | E | - | | - | |  | |  | | - | |  | |  | | - | |  | |  | | -0.147 | | |
| I x E | P x E | - | | - | |  | |  | | - | |  | |  | | - | |  | |  | | - | | |
| Fertilisation | Yes | - | | - | |  | |  | | - | |  | |  | | - | |  | |  | | - | | |
| Collecting dung | Yes | **0.276** | | -0.196 | |  | |  | | - | |  | |  | | -0.734 | |  | |  | | - | | |
| Harrowing | Yes | - | | - | |  | |  | | - | |  | |  | | - | |  | |  | | 0.205 | | |
| Reseeding | Yes | **-0.236** | | -0.087 | |  | |  | | -0.654 | |  | |  | | - | |  | |  | | - | | |
| Rolling | Yes | - | | - | |  | |  | | - | |  | |  | | 0.860 | |  | |  | | - | | |
| Herbicides | Yes | **-0.264** | | -0.125 | |  | |  | | - | |  | |  | | - | |  | |  | | - | | |
| Topping | Yes | **-0.199** | | - | |  | |  | | -0.597 | |  | |  | | - | |  | |  | | -0.210 | | |
| Topping + cutting removal | Yes | - | | -0.131 | |  | |  | | -0.893 | |  | |  | | - | |  | |  | | - | | |
| Mowing | Yes | **-0.334** | | -0.144 | |  | |  | | -0.347 | |  | |  | | -0.555 | |  | |  | | - | | |
